# Supplementary material for: Property impact of common linker segments in sequence-controlled polyesters
Source: Royal Society of Chemistry journal article supplement (doi:10.1039/c8py01443d), 2018-11-29
Supplement: c8py01443d1.pdf [file c8py01443d1.pdf]

## Supplementary Information

# Property Impact of Common Linker Segments in Sequence-Controlled Polyesters

Jordan H. Swisher<sup>a</sup>, Jamie A. Nowalk<sup>a</sup>, and Tara Y. Meyer<sup>\*a, b</sup>

a. Department of Chemistry, University of Pittsburgh, Pittsburgh, Pennsylvania 15260, United States

b. McGowan Institute for Regenerative Medicine, University of Pittsburgh, Pittsburgh, Pennsylvania 15260, United States

## Table of Contents

|            |                                                            |            |
|------------|------------------------------------------------------------|------------|
| <b>1.0</b> | <b>Supplementary Figures And Procedures</b>                | <b>2</b>   |
| 1.1        | <i>Optical Profiles</i>                                    | 2          |
| 1.2        | <i>Nanoindentation</i>                                     | 4          |
| 1.3        | <i>ICP-OES</i>                                             | 5          |
| 1.4        | <i>Fox T<sub>g</sub> predictions</i>                       | 6          |
| 1.5        | <i>Thermogravimetric Analysis</i>                          | 6          |
| 1.6        | <i>Scanning Probe Microscopy</i>                           | 7          |
| 1.7        | <i>Additional Degradation Study Data</i>                   | 7          |
| <b>2.0</b> | <b>Experimental and NMR Data</b>                           | <b>9</b>   |
| 2.1        | <i>Materials</i>                                           | 9          |
| 2.2        | <i>Starting Materials</i>                                  | 9          |
| 2.3        | <i>Alkyl Linker Containing Compounds</i>                   | 13         |
| 2.4        | <i>EG Linker Containing Compounds</i>                      | 23         |
| 2.5        | <i>Thio Linker Containing Compounds</i>                    | 33         |
| 2.6        | <i>Urea Linker Containing Compounds</i>                    | 43         |
| 2.7        | <i>Triazole Linker Containing Compounds and Precursors</i> | 53         |
| 2.8        | <i>Sy Linker Containing Compounds and Precursors</i>       | 67         |
| 2.9        | <i>EEG Linker Containing Compounds and Precursors</i>      | 87         |
| <b>3.0</b> | <b>References</b>                                          | <b>101</b> |

## 1.0 SUPPLEMENTARY FIGURES AND PROCEDURES

## 1.1 OPTICAL PROFILES

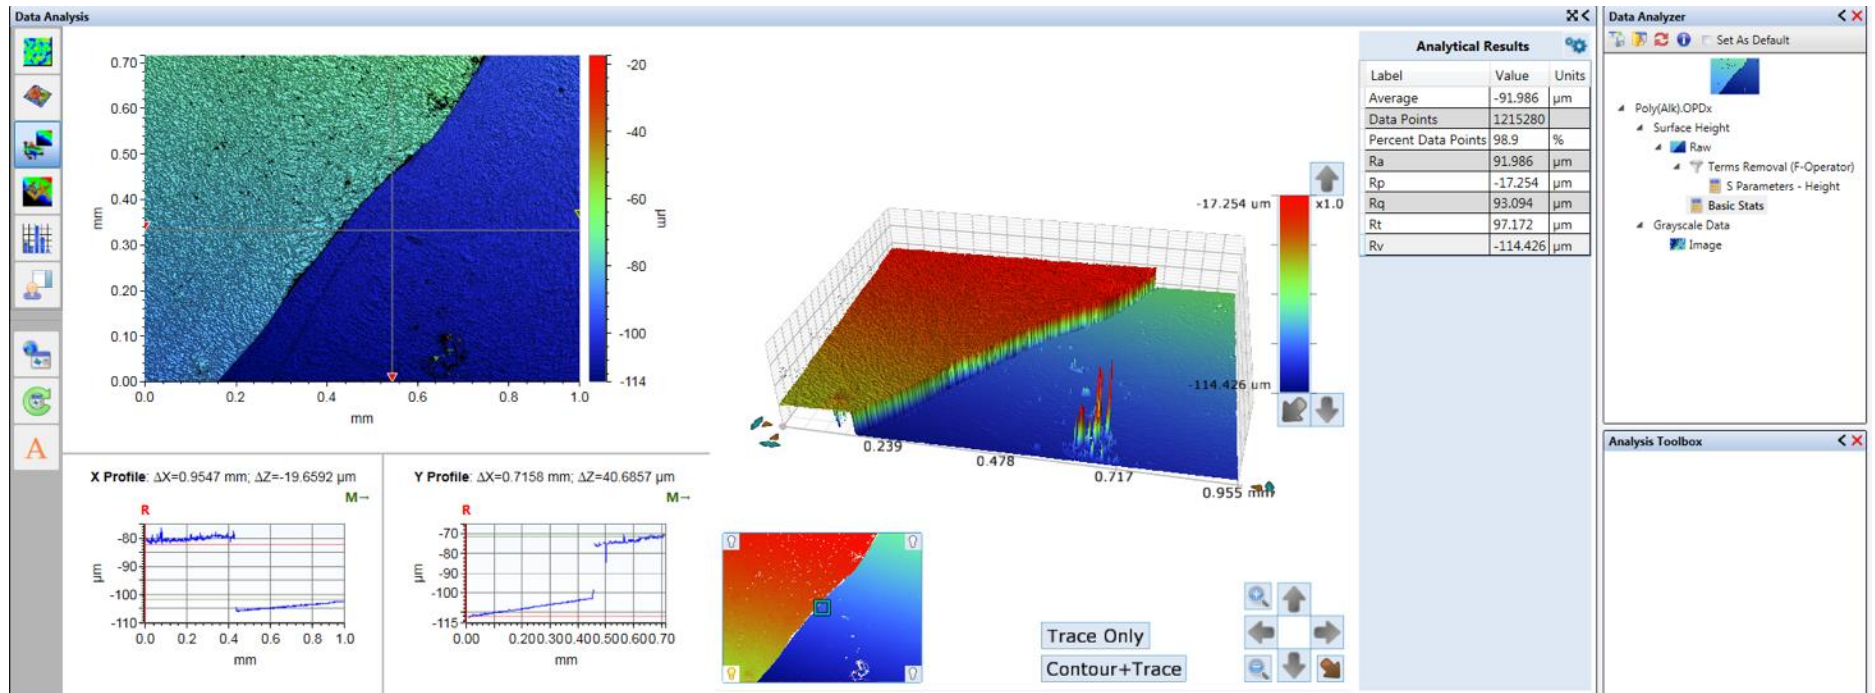

Figure S1. Optical profile of poly(Alk).

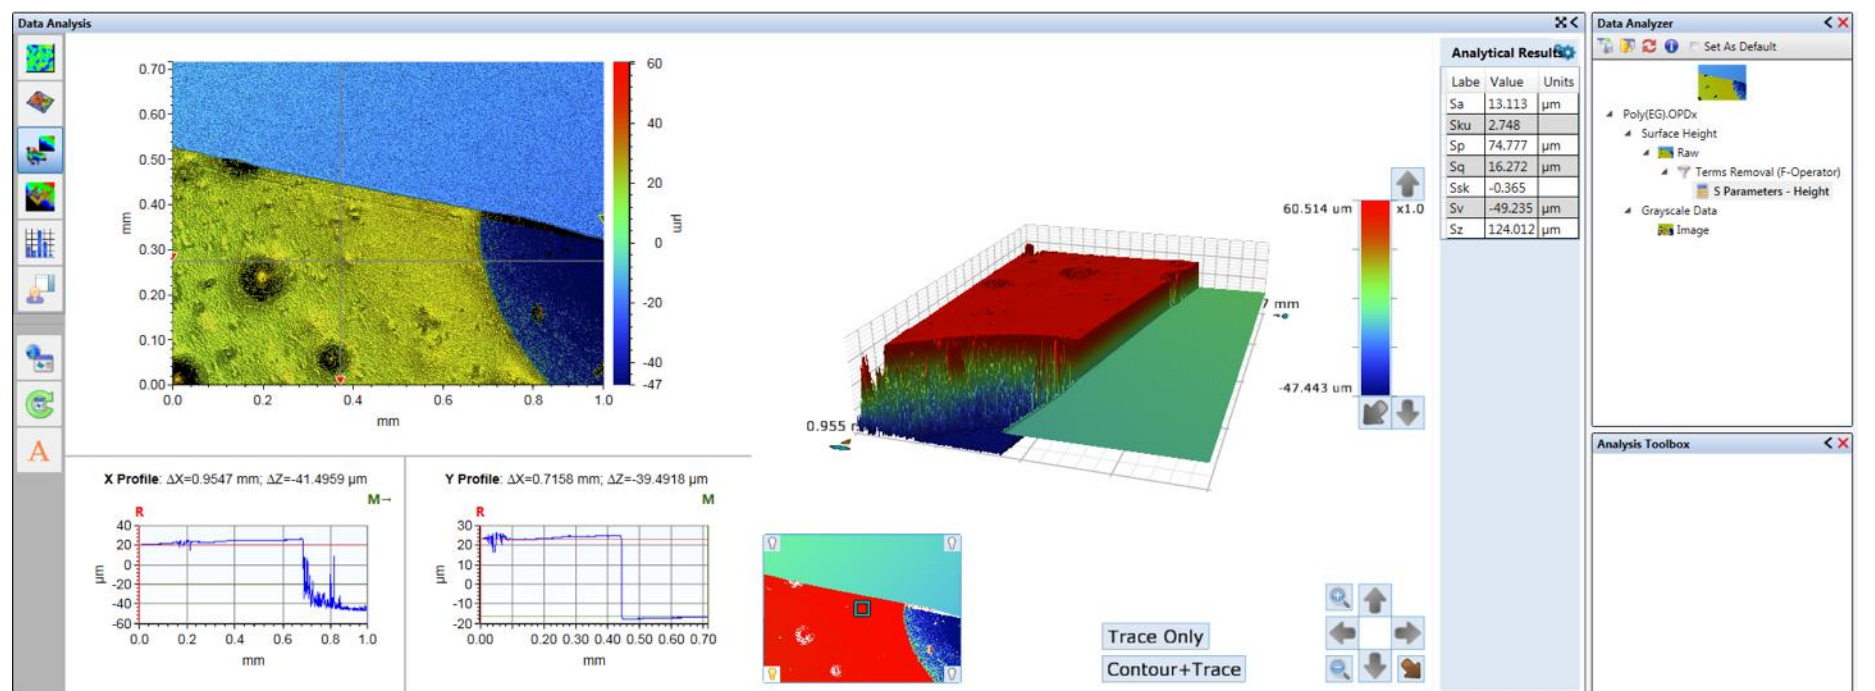

Figure S2. Optical profile of poly(EG).

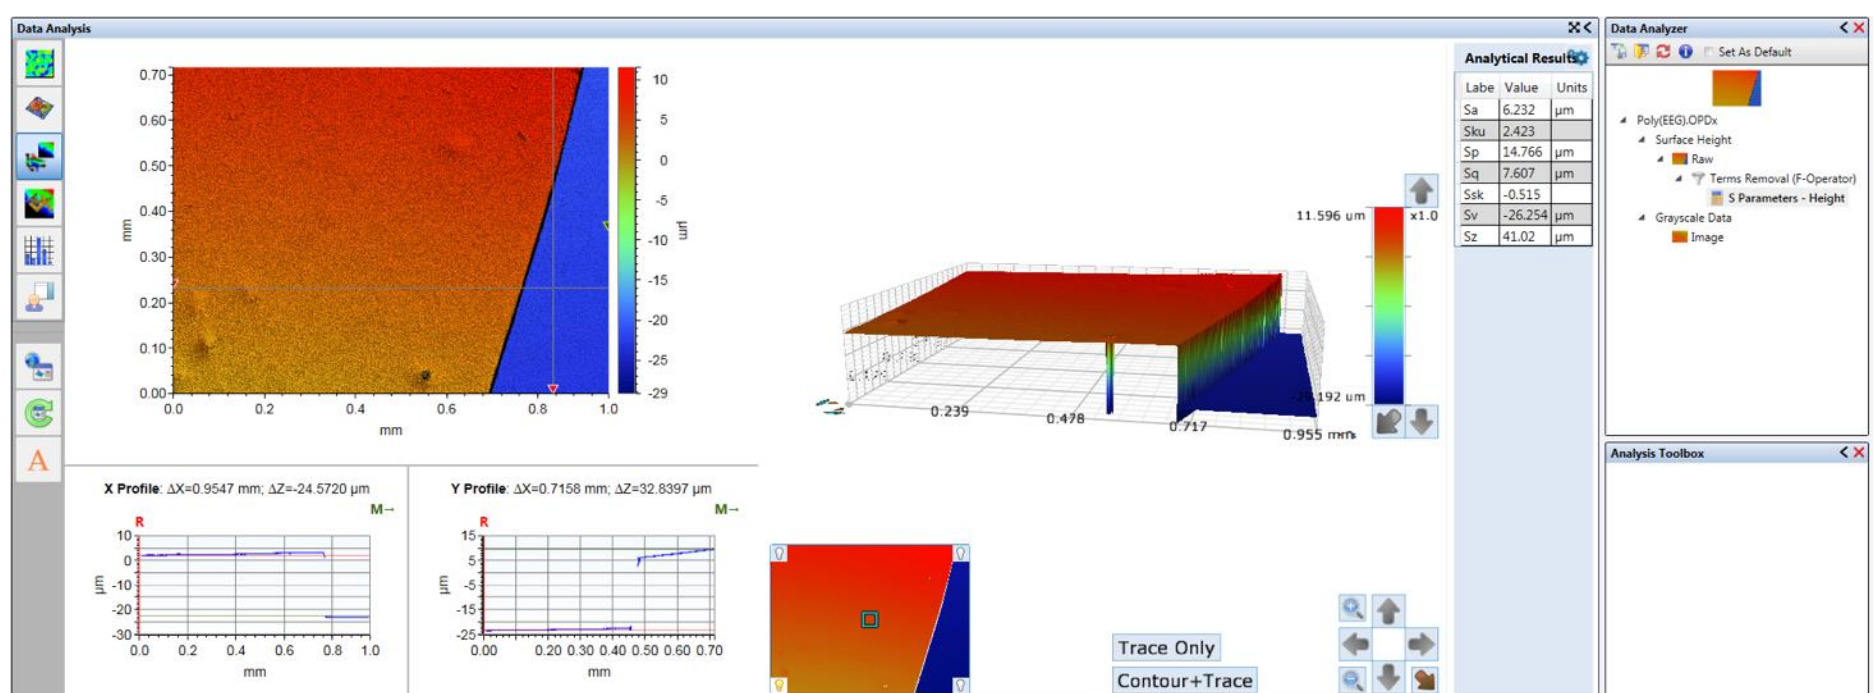

Figure S3. Optical profile of poly(EEG).



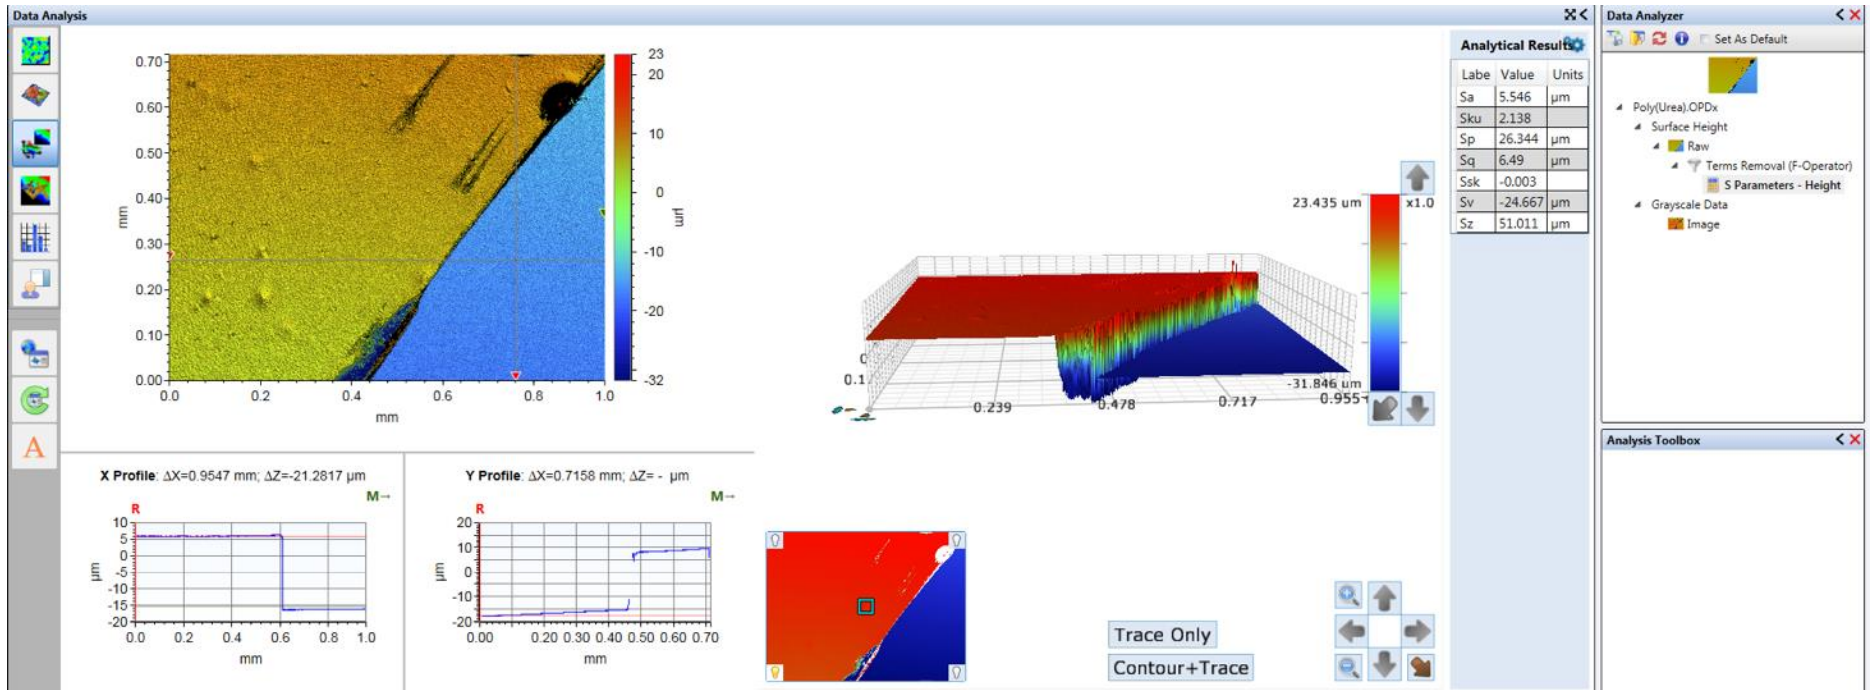

Figure S4. Optical profile of poly(Urea).

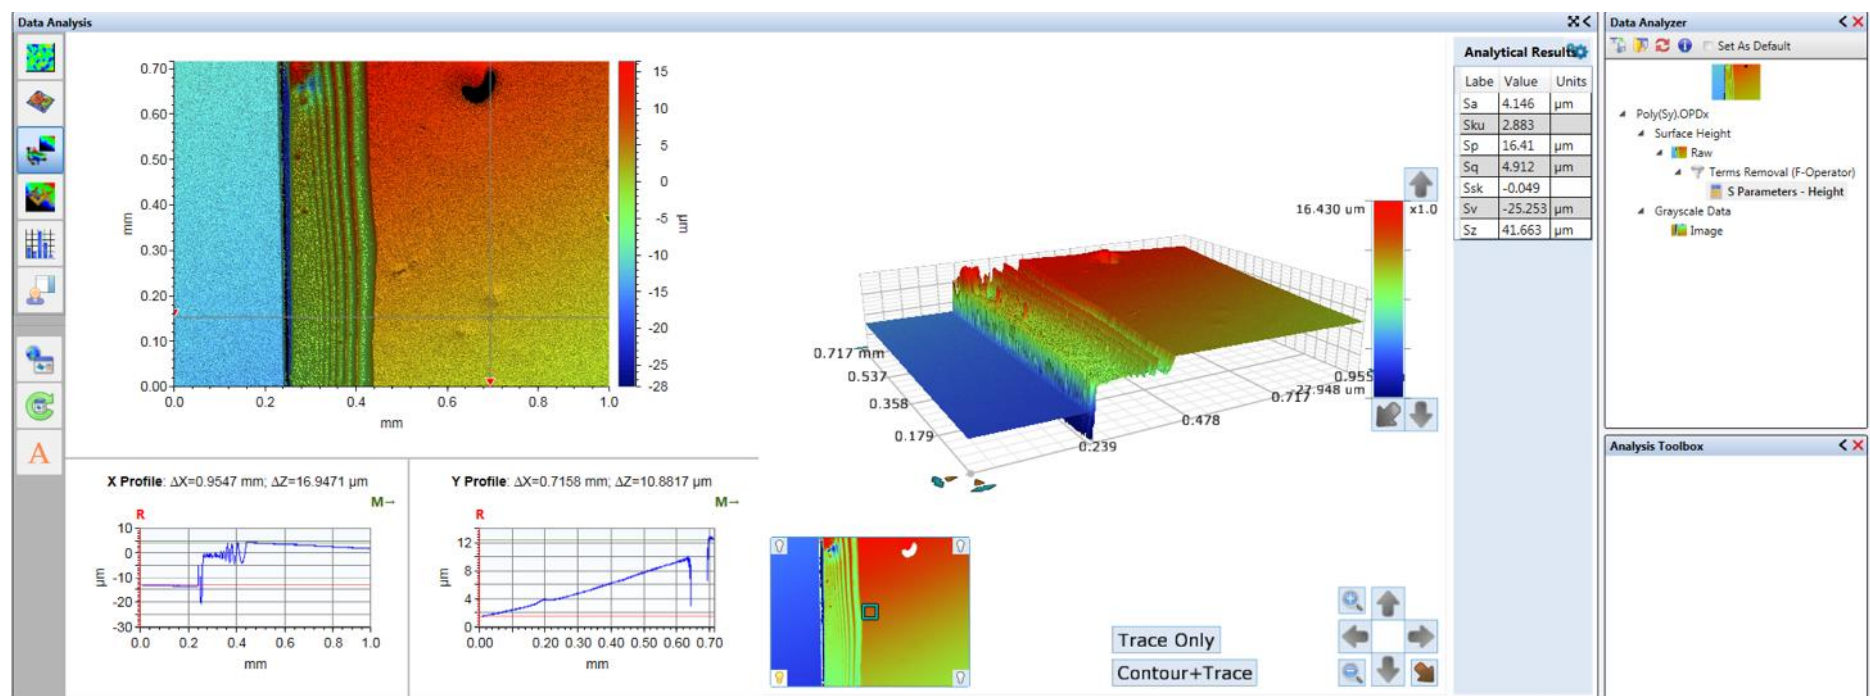

Figure S5. Optical profile of poly(Sy).

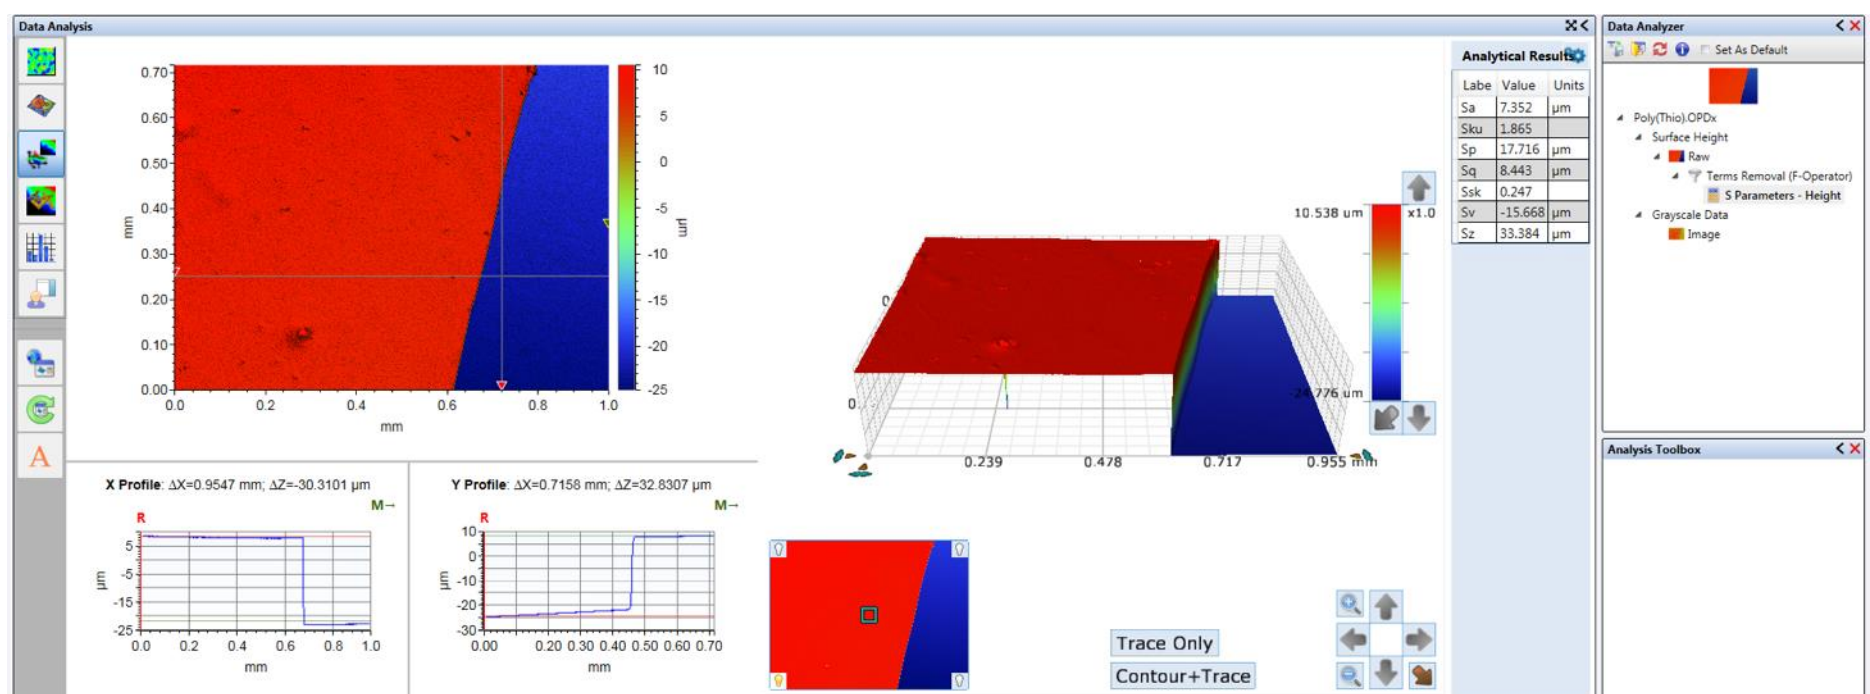

Figure S6. Optical profile of poly(Thio).

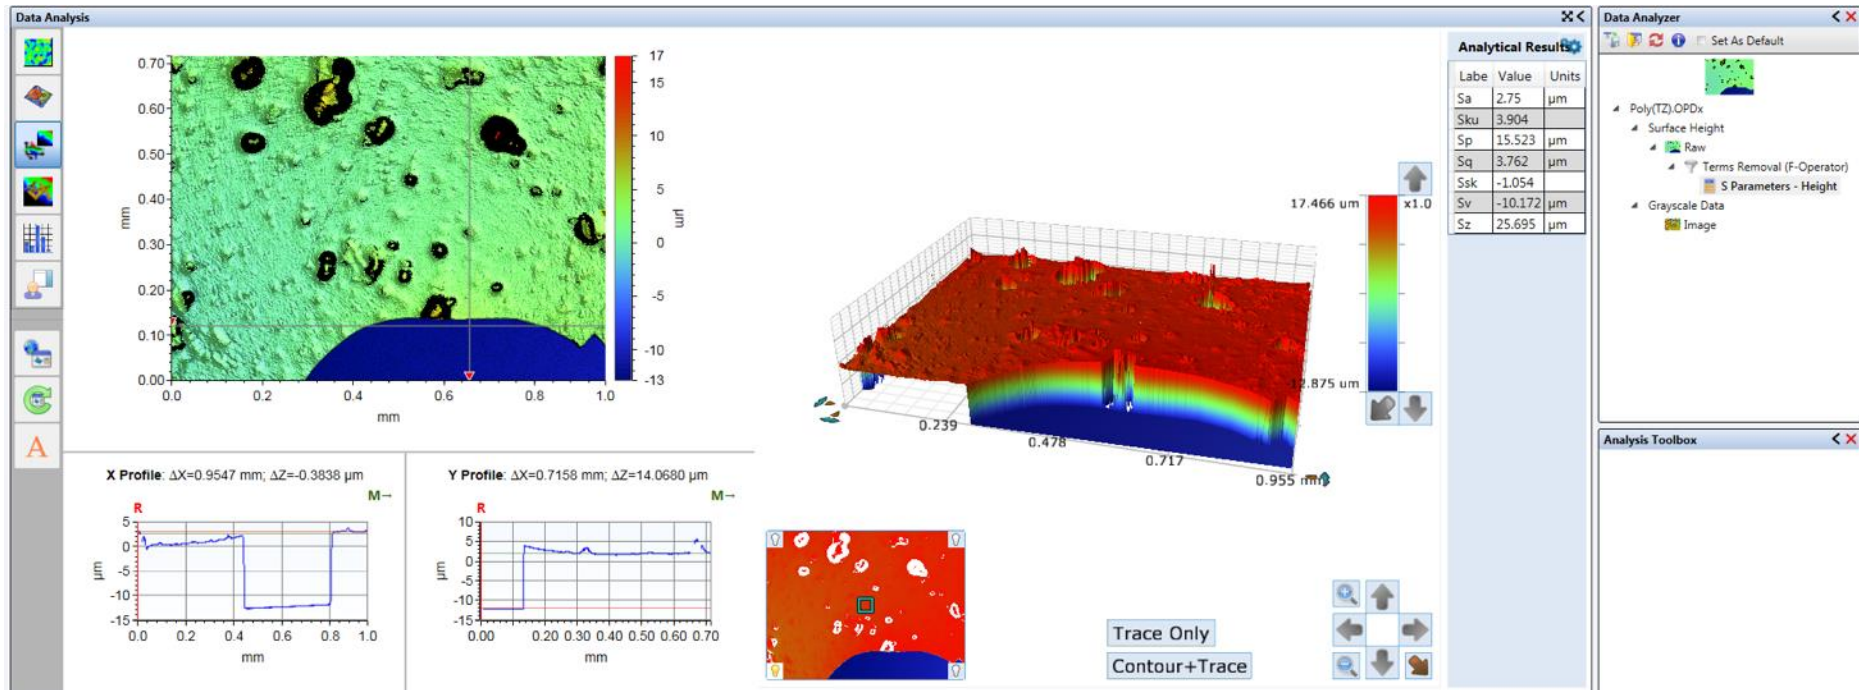

Figure S7. Optical profile of poly(TZ).

## 1.2 NANOINDENTATION

Nanoindentation was performed using a Hysitron TI 950 Triboindenter with a Berkovich diamond indenter tip. All indentations were performed at room temperature using a displacement-controlled method with a set displacement of 4,000 nm. Each indentation had a loading segment of 20 seconds, a holding segment of 10 s, and a deloading segment of 20 s. The loading segment had variable loading rates, depending on the material, to reach an indentation depth of 4,000 nm. The holding segment held the tip at 4,000 nm for 10 s to limit nosing. A 4 x 5 matrix of indentations was performed with 200 micrometers between indentations to avoid overlap and local bias on the film surface.

Load-displacement curves were provided by the instrument and all other values were obtained from analysis of the load-displacement curves using the Oliver-Pharr method.<sup>1-5</sup> A representative load-displacement curve with associated values is provided in Figure S8.

The maximum load,  $P_{Max}$ , is equal to the maximum force applied during the indentation. The stiffness of the films,  $S$ , is defined as the slope of the initial 30% of the deloading curve. The hardness value,  $H$ , is defined as:

$$(S1) \quad H = \frac{P_{Max}}{A(h_c)}$$

where  $A(h_c)$  is the projected contact area at the contact depth, and is defined as:

$$(S2) \quad A(h_c) = 24.5h_c^2$$

where 24.5 is a geometrical constant associated with the Berkovich tip. The contact depth,  $h_c$ , which is not equal to the maximum indentation depth,  $h_{max}$ , in elastic models, was estimated as:

$$(S3) \quad h_c = h_{Max} - \varepsilon \frac{P_{Max}}{S}$$

where  $\varepsilon$  is another geometrical constant related to the Berkovich tip equal to 0.75.

The reduced elastic modulus,  $E_r$ , was defined as:

$$(S4) \quad E_r = S \frac{\sqrt{\pi}}{2\beta\sqrt{A(h_c)}}$$

where  $\beta$  is a correction factor ( $\beta = 1.034$  for a Berkovich tip). Finally, Young's Modulus,  $E$ , was calculated by Eq. S5:

$$(S5) \quad \frac{1}{E_r} = \frac{1 - \nu^2}{E} + \frac{1 - \nu_i^2}{E_i}$$

where  $\nu$  and  $E$  are the Poisson's ratio and modulus of the sample, (Poisson's ratio was defined as 0.3, a standard value for polymers<sup>6</sup>) and  $\nu_i$  and  $E_i$  are the Poisson's ratio and modulus of the diamond indenter (0.07 and 1141 GPa, respectively).



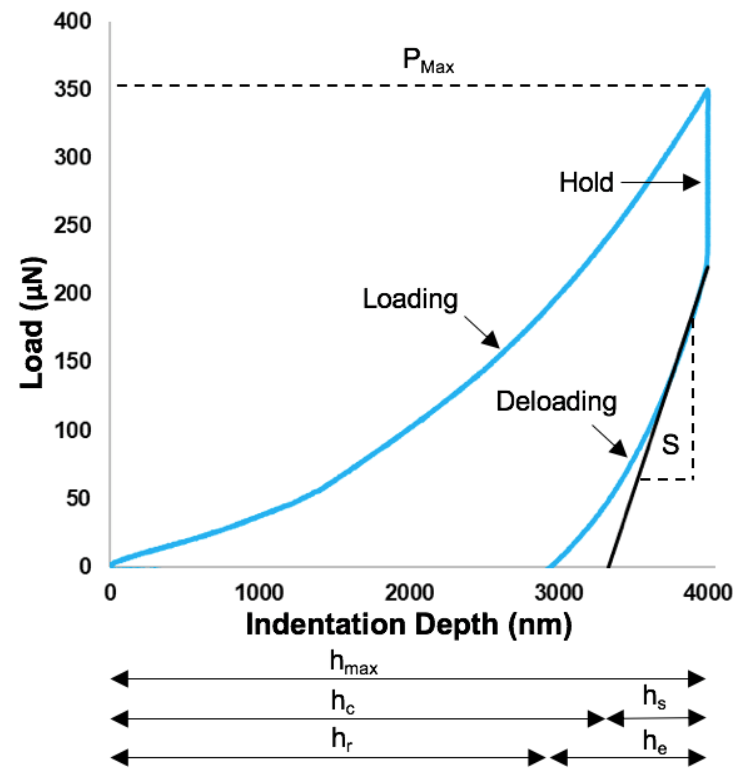

**Figure S8.** Representative load-displacement curve where  $h_s$  is the sink-in depth,  $h_r$  is the residual indent depth and  $h_e$  is the depth of elastic recovery.

From the 20 indentations performed on each polymer, at least 17 were averaged to determine  $E$ ,  $P_{Max}$ ,  $E_r$ ,  $H$  and  $S$ . The removed outliers were determined by using the Thompson-Tau method on  $E$ ,  $E_r$ ,  $H$ ,  $S$  and  $P_{max}$  values of each indent, and if any of these five values for a particular indent were determined to be outliers, that indent was removed from the dataset.

Scanning probe microscopy (SPM) images were taken using the imaging mode of the Hysitron software with a scan rate of 1.00 Hz, tip velocity of 20 µm/sec, and scan size of 10 µm.

### 1.3 ICP-OES

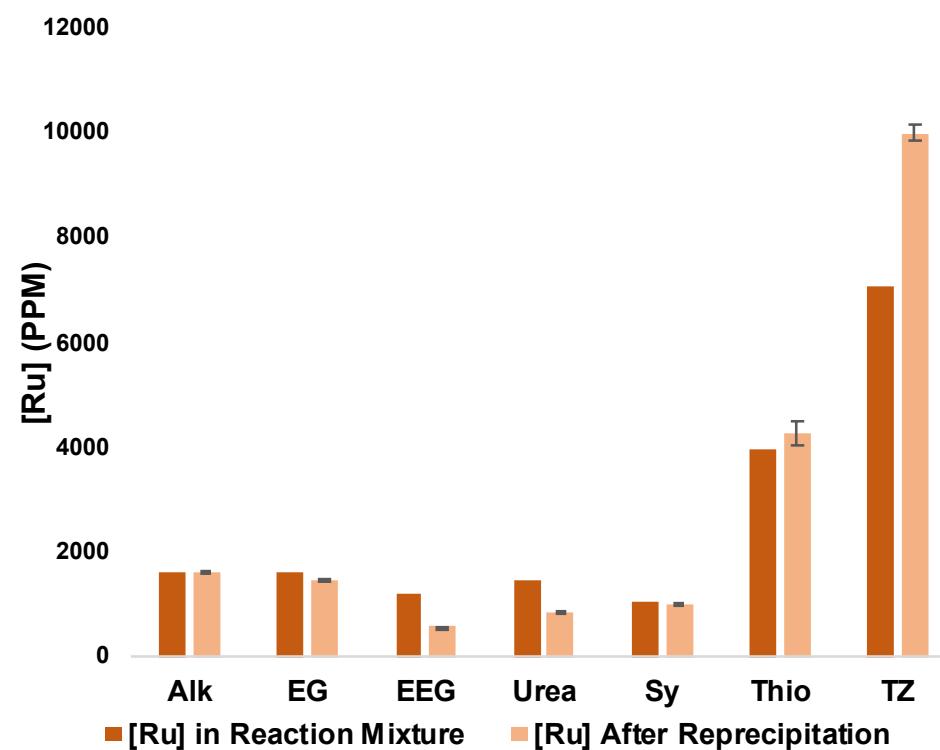

**Figure S9.** Calculated [Ru] in the polymerization reaction mixture, and the [Ru] after reprecipitation of the polymer samples determined by ICP-OES. Percent error determined by analysis of six duplicate samples.

## 1.4 FOX T<sub>g</sub> PREDICTIONS

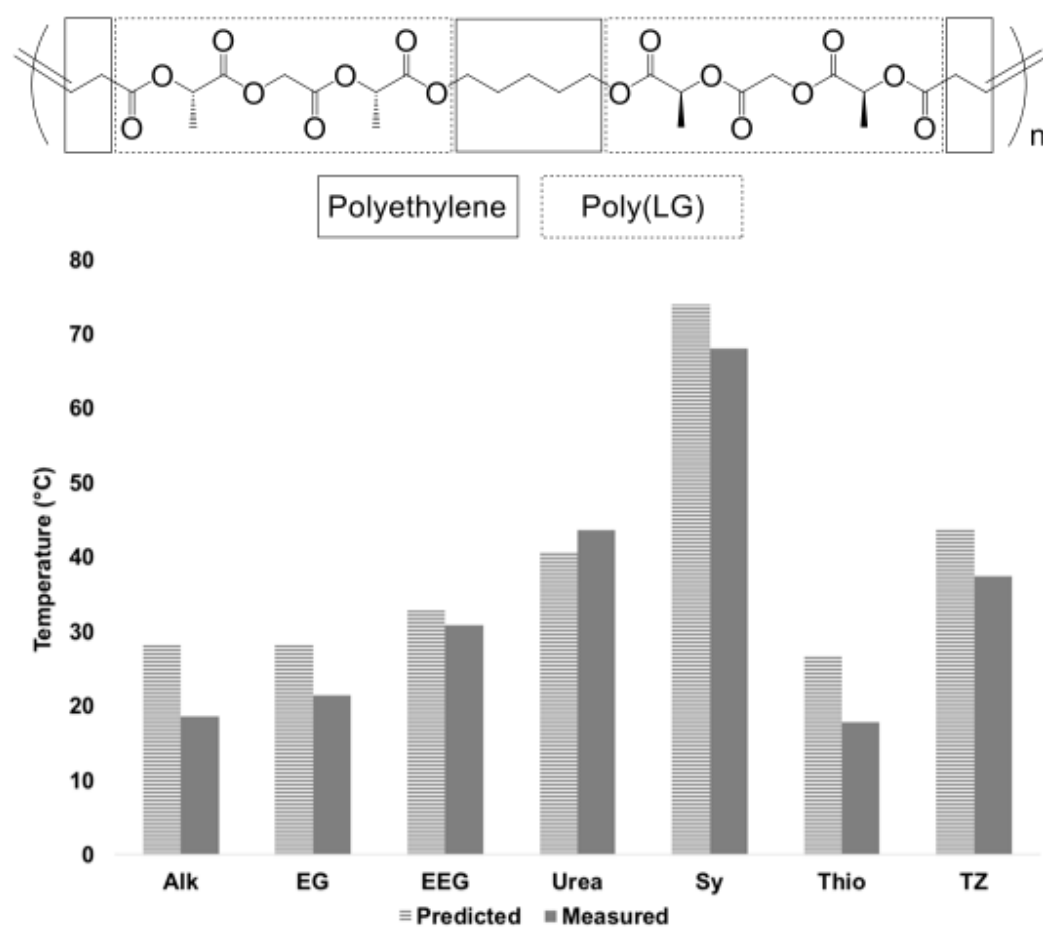

**Figure S10.** Method used to define segments for predicting T<sub>g</sub> (top) and predicted and measured T<sub>g</sub> (bottom).

## 1.5 THERMOGRAVIMETRIC ANALYSIS

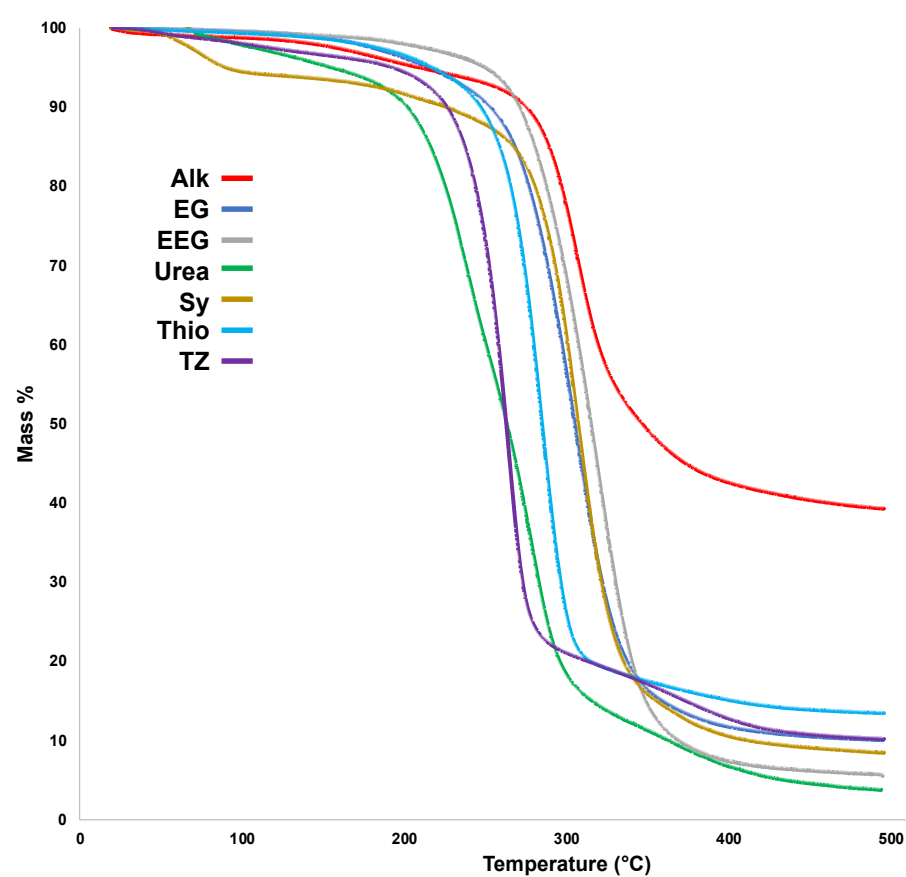

**Figure S11.** Thermogravimetric analysis.



## 1.6 SCANNING PROBE MICROSCOPY

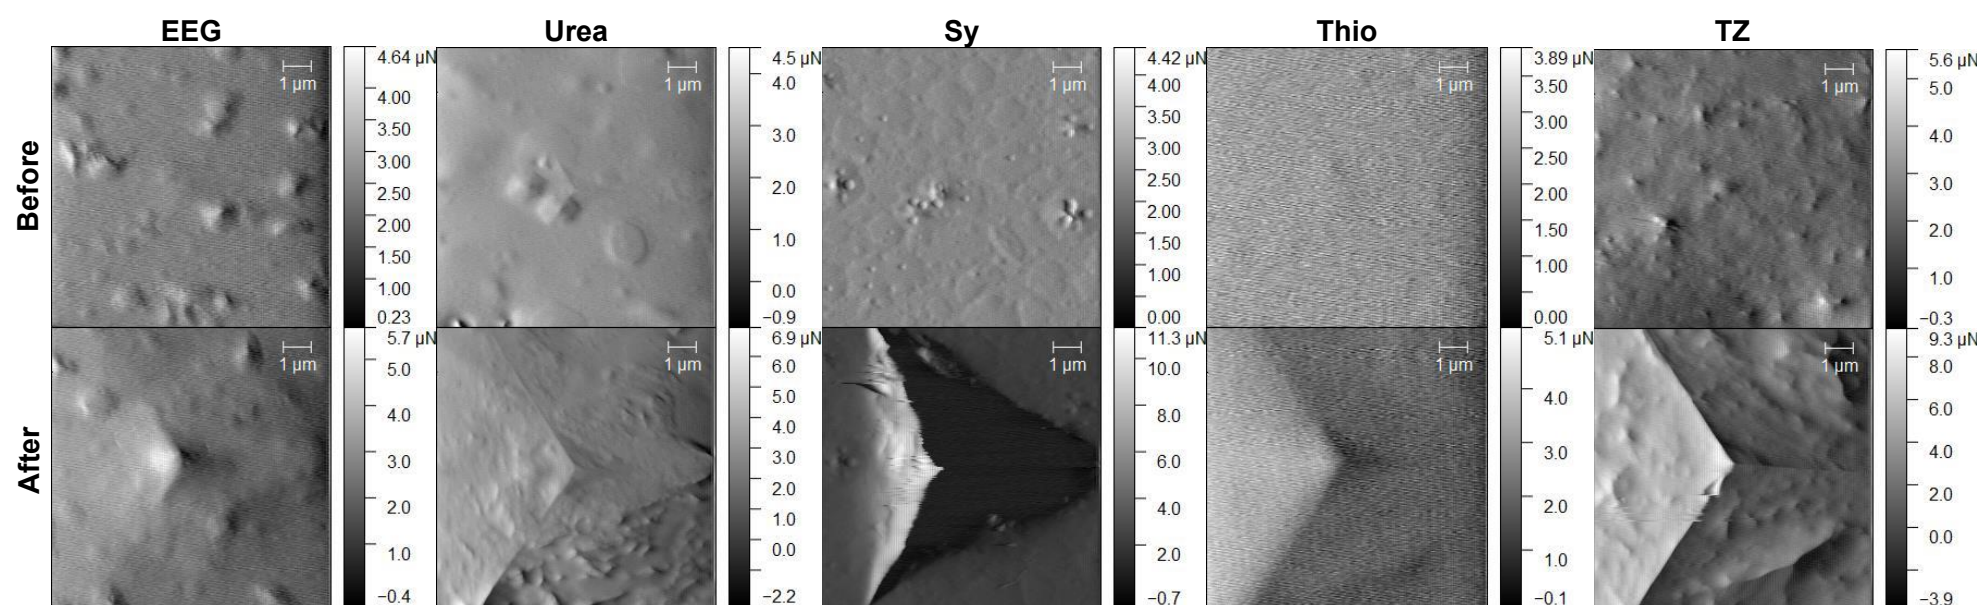

Figure S12. Scanning probe microscopy of selected polymers before and after indentation.

## 1.7 ADDITIONAL DEGRADATION STUDY DATA

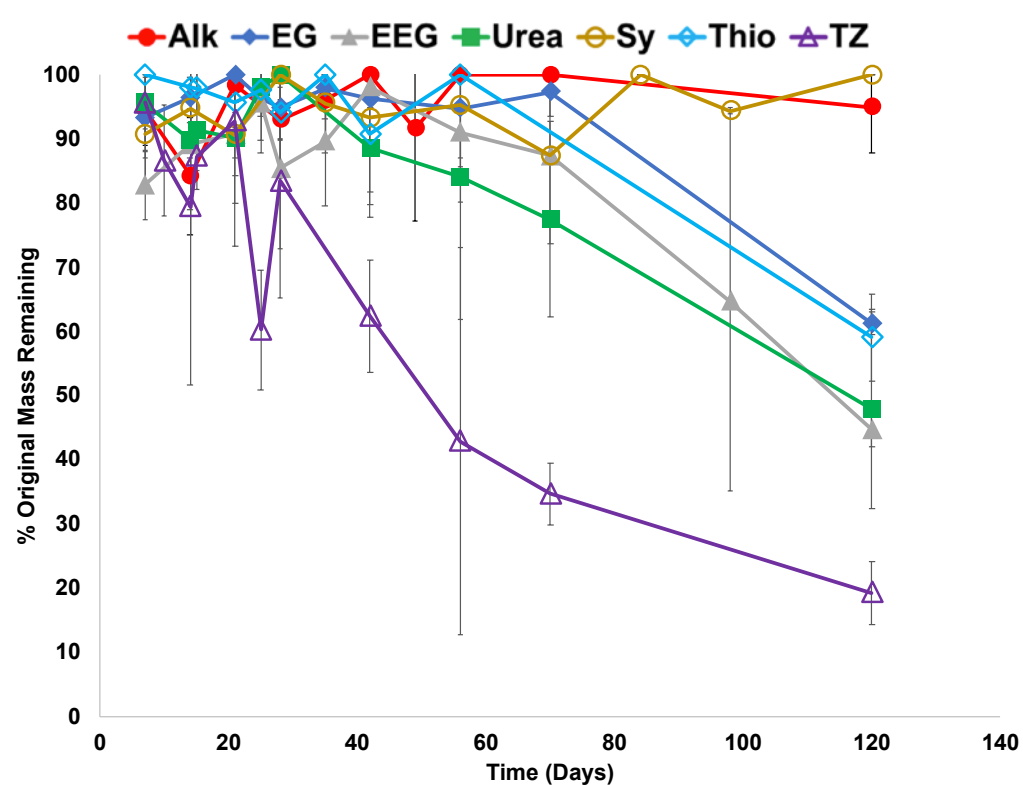

Figure S13. Film mass as a function of degradation time.

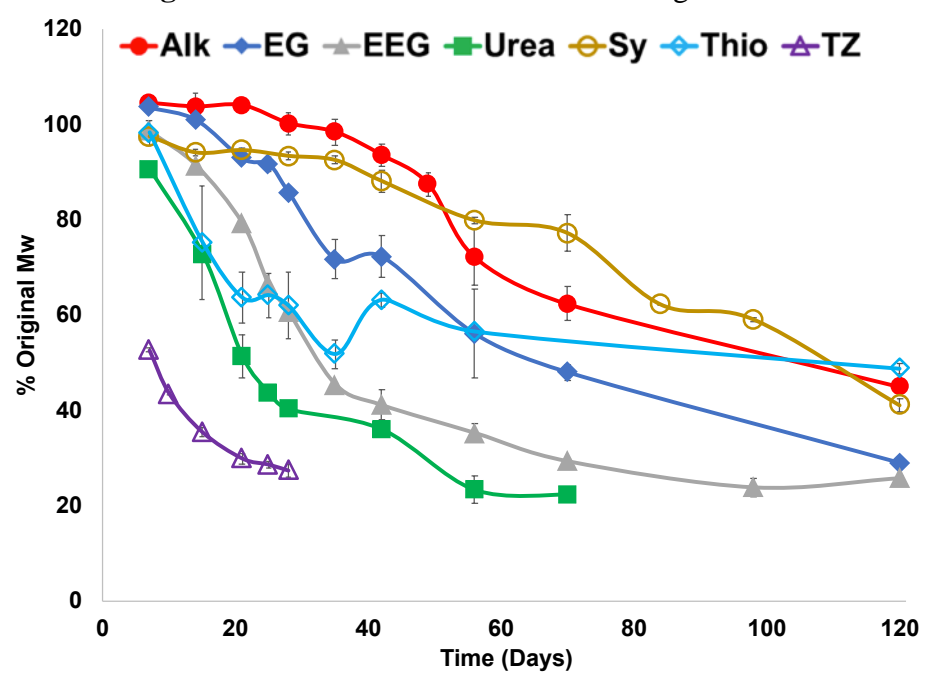Figure S14. Molecular weight ( $M_w$ ) as a function of degradation time.

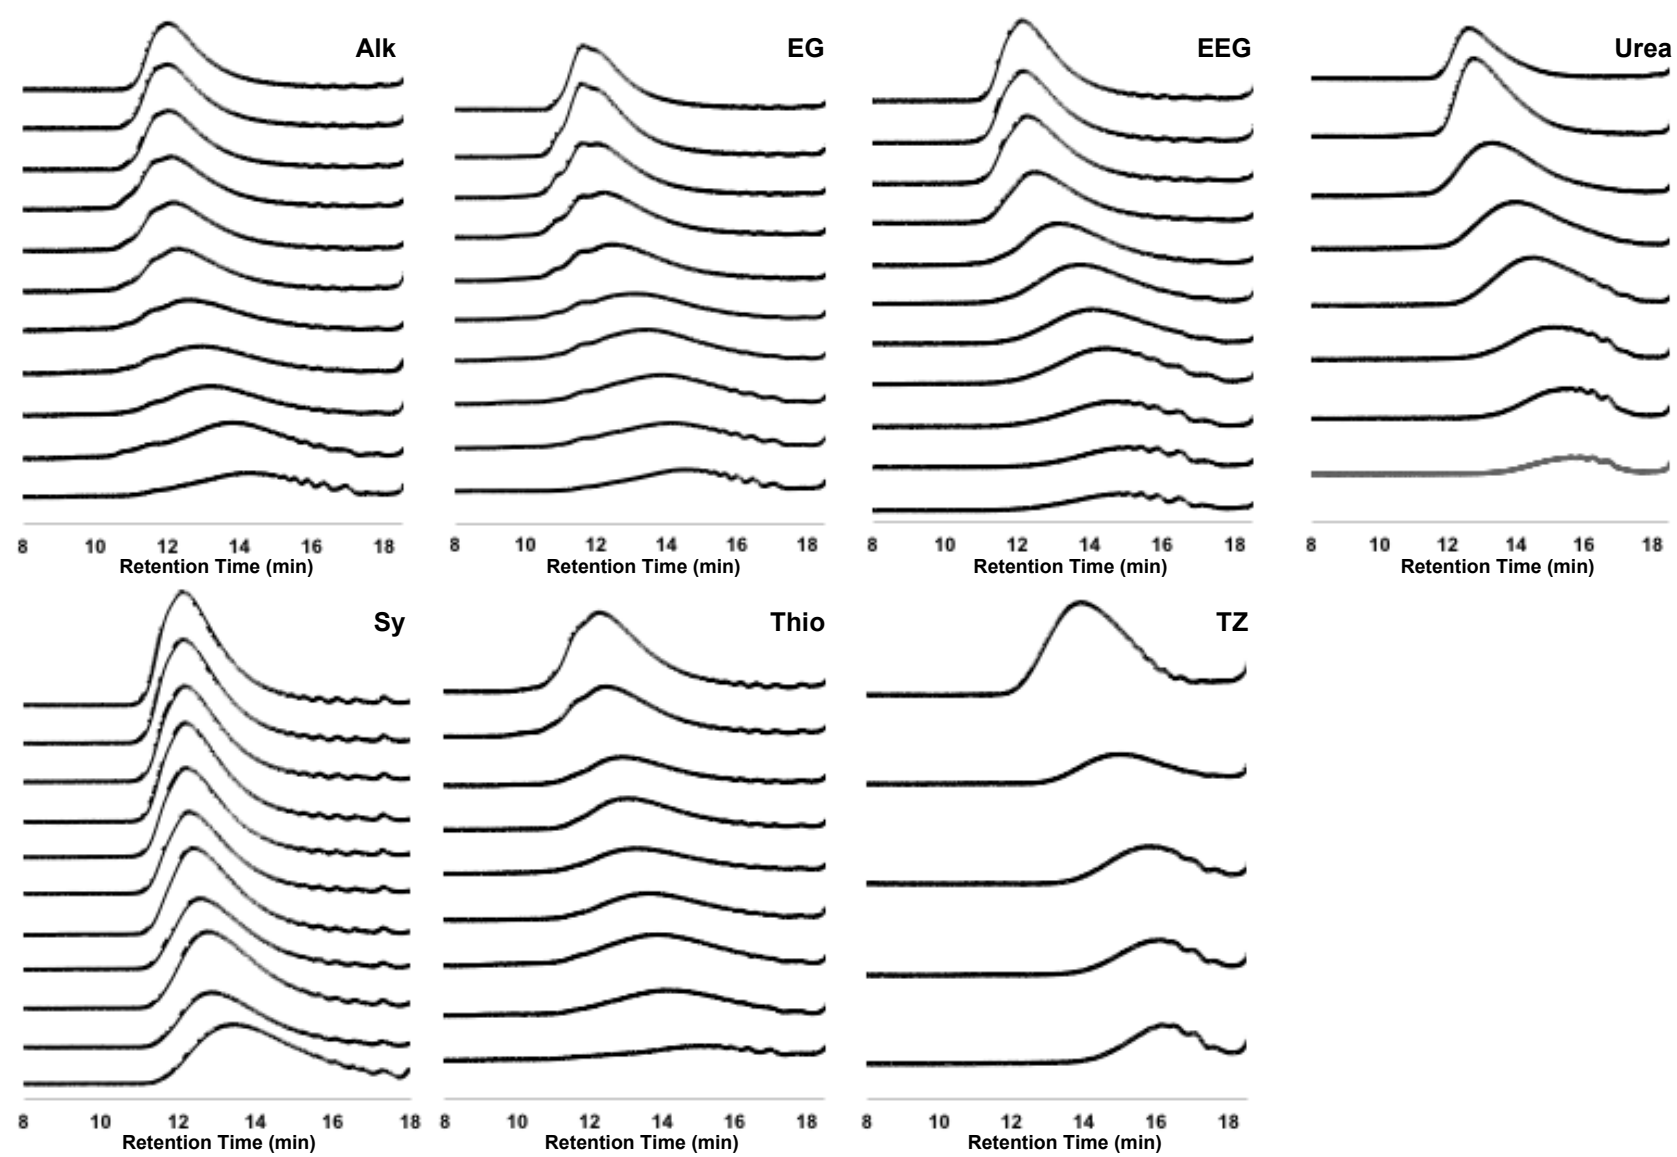

**Figure S15.** SEC traces of polymers at week 0 (top) and at each consecutive timepoint during degradation.



## 2.0 EXPERIMENTAL AND NMR DATA

### 2.1 MATERIALS

All chemicals were purchased from Sigma-Aldrich, Inc. and used without purification unless specified otherwise. Ethyl acetate, methylene chloride and tetrahydrofuran (Fisher Scientific, Inc.) were flowed through an aluminum oxide column. Column chromatography was done using Sorbent Tech. 60 Å, 40-63 μm standard grade silica. Dicyclohexylcarbodiimide (DCC) was purchased from Oakwood Products, Inc. 1,4-Dimethylpyridinium *p*-toluenesulfonate (DPTS) was prepared using a previously reported method.<sup>7</sup> Synthetic procedures were adapted from several previous references.<sup>8-10</sup>

### 2.2 STARTING MATERIALS

| <b>Bn-LGL-Si</b>                                     |           |      |                                   | <b><sup>13</sup>C-NMR (400 MHz, CDCl<sub>3</sub>)</b> |                       | <b>HRMS (ESI)</b>                                                       |  |
|------------------------------------------------------|-----------|------|-----------------------------------|-------------------------------------------------------|-----------------------|-------------------------------------------------------------------------|--|
|                                                      |           |      |                                   | $\delta$ (ppm) +<br>Assignment                        |                       | <u>Calc. Mass</u><br>424.19 amu                                         |  |
|                                                      |           |      |                                   |                                                       |                       |                                                                         |  |
|                                                      |           |      |                                   | -4.81                                                 | Si                    |                                                                         |  |
|                                                      |           |      |                                   | 16.99                                                 | L (CH <sub>3</sub> )  | <u>Found</u><br>[M + H] <sup>+</sup><br>425.20069<br>amu                |  |
|                                                      |           |      |                                   | 18.42                                                 | L (CH <sub>3</sub> )  |                                                                         |  |
| <b><sup>1</sup>H-NMR (400 MHz, CDCl<sub>3</sub>)</b> |           |      |                                   | 21.49                                                 | Si (C)                | <u>Composition</u><br>C <sub>21</sub> H <sub>32</sub> O <sub>7</sub> Si |  |
| dδ (ppm)                                             | Mult. (J) | Int. | Assignment                        | 25.83                                                 | Si (t-Bu)             |                                                                         |  |
| 0.09                                                 | s         | 3    | Si (CH <sub>3</sub> )             | 60.62                                                 | G (CH <sub>2</sub> )  |                                                                         |  |
| 0.11                                                 | s         | 3    | Si (CH <sub>3</sub> )             | 67.34                                                 | Bn (CH <sub>2</sub> ) |                                                                         |  |
| 0.91                                                 | s         | 9    | Si (t-Bu)                         | 68.20                                                 | L (CH)                |                                                                         |  |
| 1.46                                                 | d (6.8)   | 3    | L <sub>1</sub> (CH <sub>3</sub> ) | 69.47                                                 | L (CH)                |                                                                         |  |
| 1.51                                                 | d (7.1)   | 3    | L <sub>2</sub> (CH <sub>3</sub> ) | 128.31                                                | Bn (CH)               |                                                                         |  |
| 4.44                                                 | q (6.8)   | 1    | L <sub>1</sub> (CH)               | 128.61                                                | Bn (CH)               |                                                                         |  |
| 4.66                                                 | d (16)    | 1    | G <sub>1</sub>                    | 128.76                                                | Bn (CH)               |                                                                         |  |
| 4.80                                                 | d (16)    | 1    | G <sub>1</sub>                    | 135.27                                                | Bn (CH)               |                                                                         |  |
| 5.18                                                 | m         | 2    | Bn (CH <sub>2</sub> )             | 167.06                                                | CO                    |                                                                         |  |
| 5.23                                                 | q (7.1)   | 1    | L <sub>2</sub> (CH)               | 170.04                                                | CO                    |                                                                         |  |
| 7.35                                                 | m         | 5    | Bn<br>(Aromatic)                  | 173.56                                                | CO                    |                                                                         |  |

**Bn-LG** (4.17 g, 17.5 mmol, 1 eq) and **L-Si** (3.8 g, 18.4 mmol, 1.05 eq) were dissolved in dry DCM and added to a flame dried 100 mL Schlenk flask under nitrogen. DPTS (1.03 g, 3.5 mmol, 0.2 eq) and DCC (4.0 g, 19.3 mmol, 1.1 eq) were added to the reaction mixture sequentially and allowed to stir at RT overnight. The reaction mixture was diluted with hexanes, filtered to remove DCU, concentrated, and the crude oil was purified via column chromatography (silica, EtOAc/hexanes) to yield a colorless oil (5.27 g, 71% yield).

JHS-3006; Bn-LGL-Si; CDCl<sub>3</sub>; 1H; 400a; 16 Scans;  
9/13/16

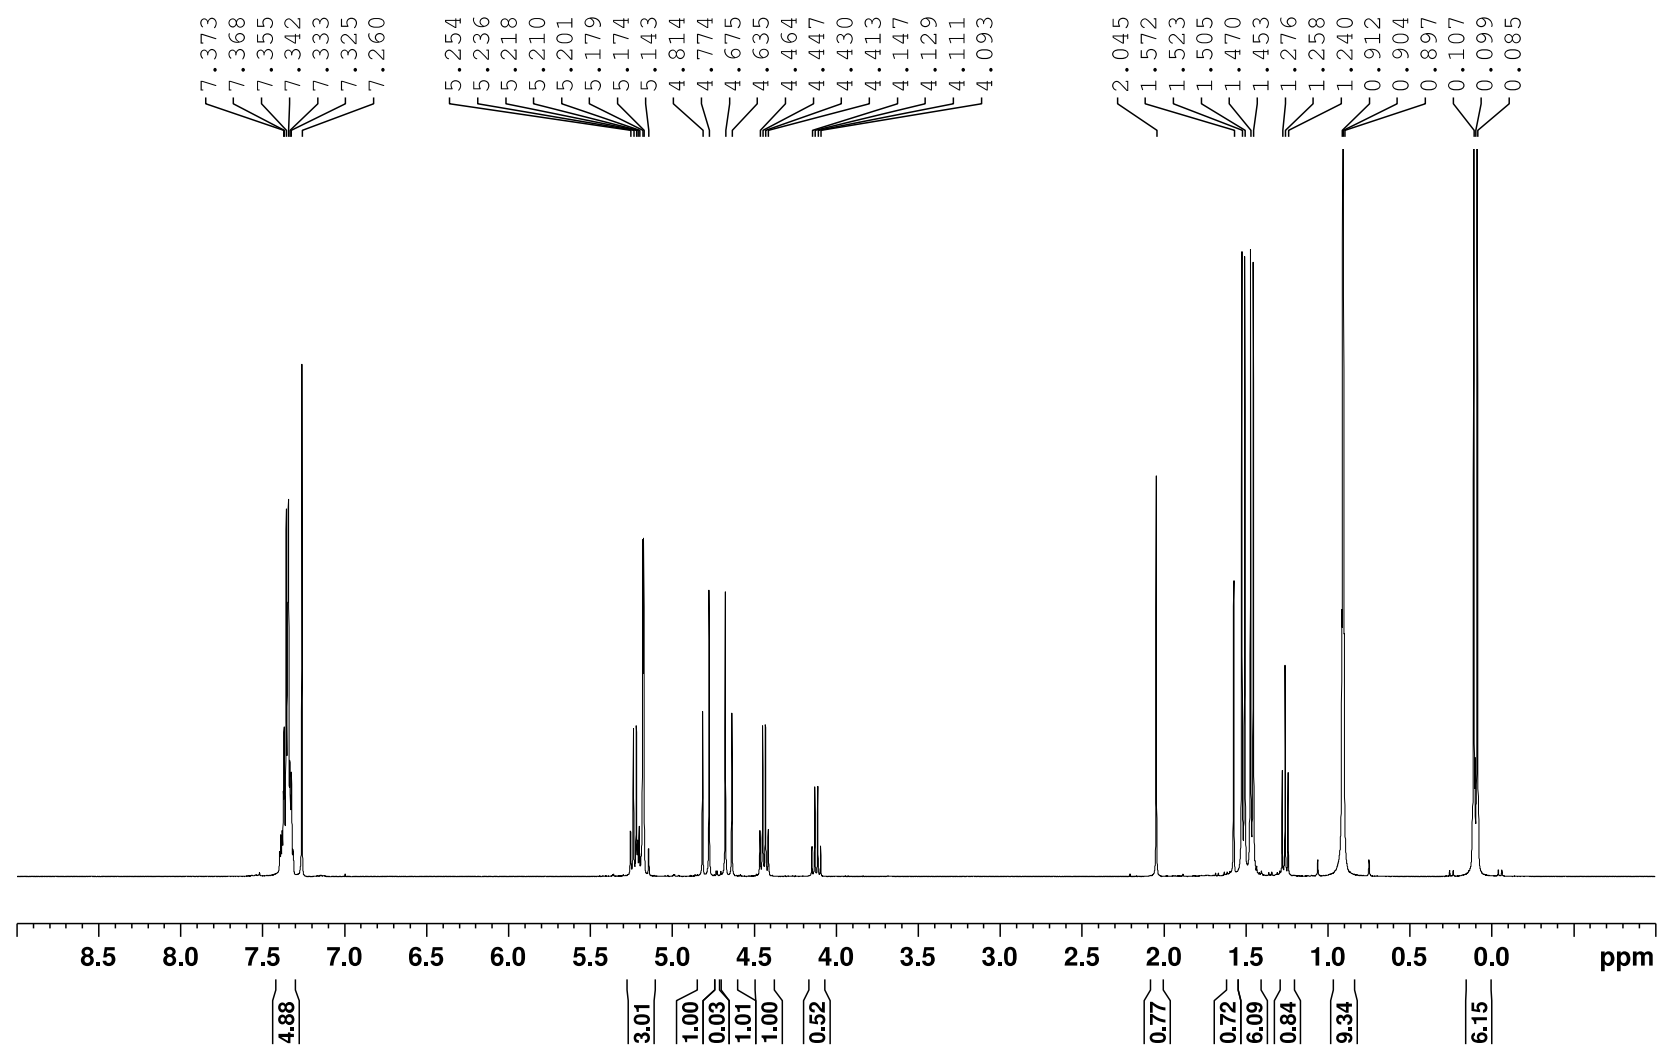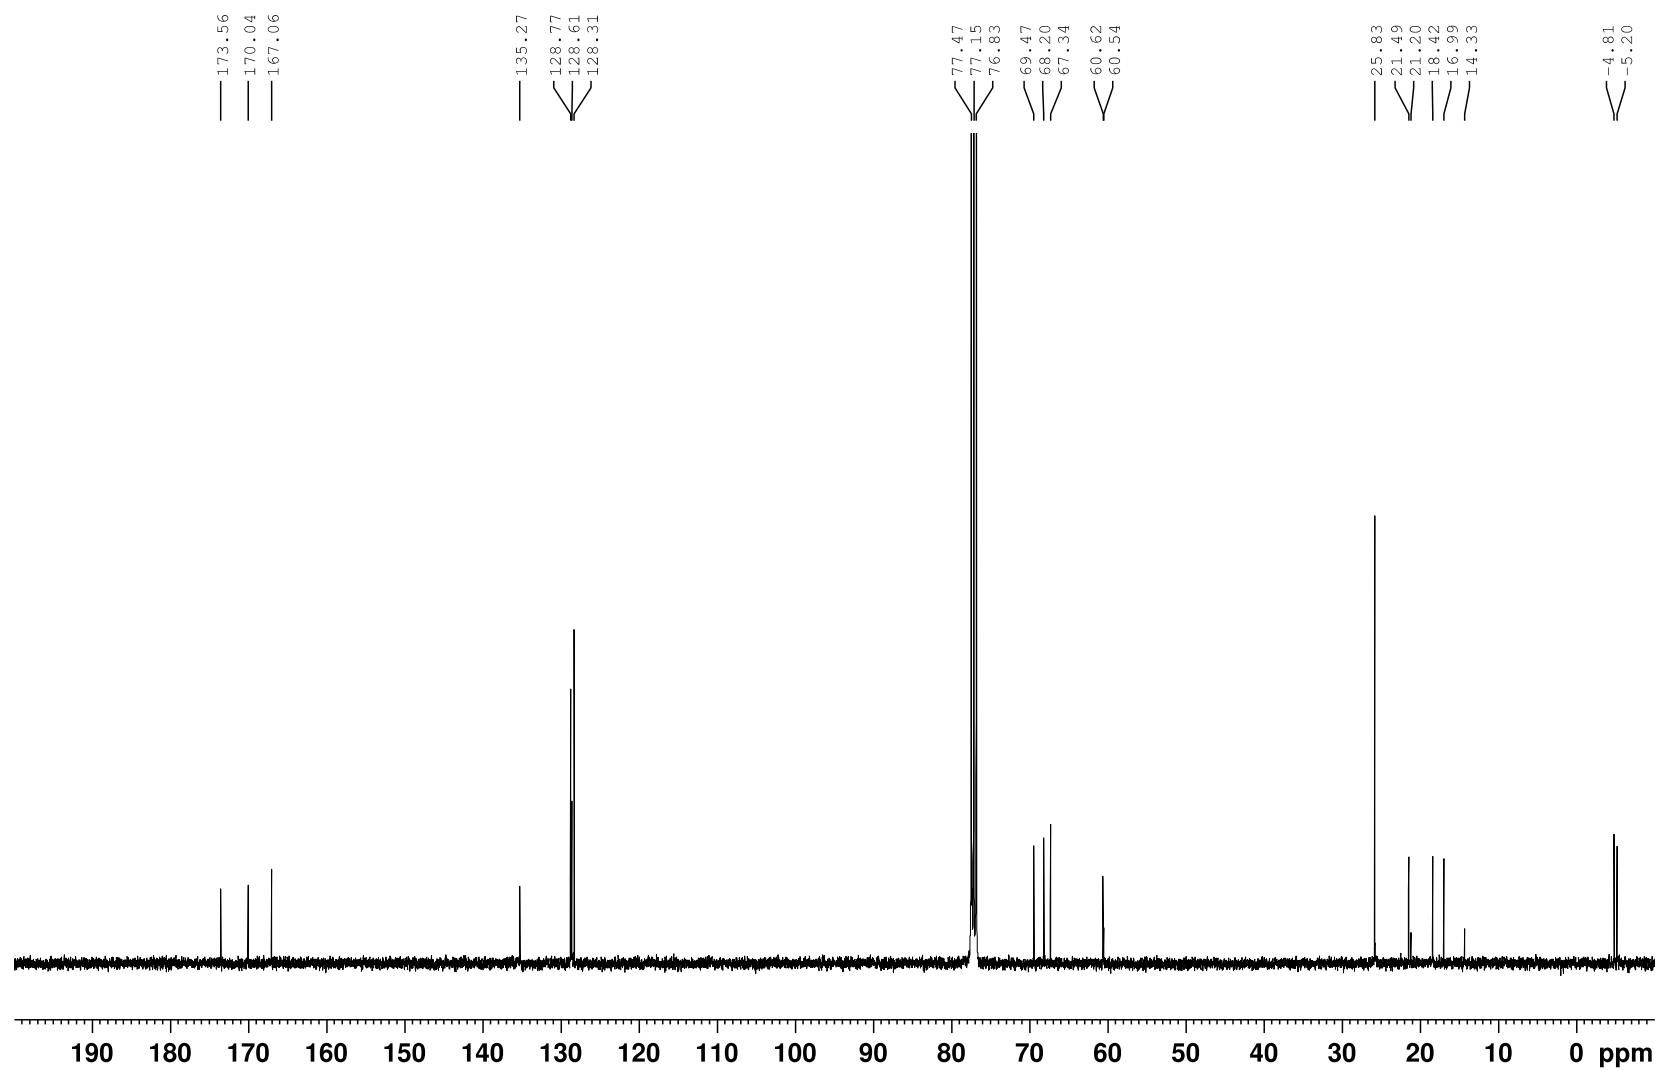



| <b>LGL-Si</b>                                                                      |           |      |                                   |                                                   |                                                   |
|------------------------------------------------------------------------------------|-----------|------|-----------------------------------|---------------------------------------------------|---------------------------------------------------|
| 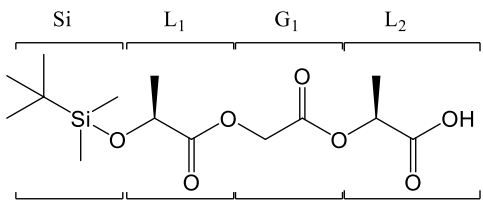 |           |      |                                   | <sup>13</sup> C-NMR (400 MHz, CDCl <sub>3</sub> ) | HRMS (ESI)                                        |
|                                                                                    |           |      |                                   | δ (ppm) + Assignment                              | Calc. Mass                                        |
|                                                                                    |           |      | -5.23                             | Si                                                | 334.14 amu                                        |
|                                                                                    |           |      | -4.86                             | Si                                                |                                                   |
|                                                                                    |           |      | 16.99                             | L (CH <sub>3</sub> )                              | <u>Calc.</u>                                      |
|                                                                                    |           |      | 18.39                             | L (CH <sub>3</sub> )                              | [M + H] <sup>+</sup>                              |
|                                                                                    |           |      | 21.45                             | Si (C)                                            | 335.14 amu                                        |
|                                                                                    |           |      | 25.79                             | Si (t-Bu)                                         |                                                   |
|                                                                                    |           |      | 60.55                             | G (CH <sub>2</sub> )                              | <u>Found</u>                                      |
|                                                                                    |           |      | 68.17                             | L (CH)                                            | [M + H] <sup>+</sup>                              |
|                                                                                    |           |      | 68.89                             | L (CH)                                            | 335.15421                                         |
|                                                                                    |           |      | 167.02                            | CO                                                | amu                                               |
|                                                                                    |           |      | 173.63                            | CO                                                |                                                   |
|                                                                                    |           |      | 175.34                            | CO                                                | <u>Composition</u>                                |
|                                                                                    |           |      |                                   |                                                   | C <sub>14</sub> H <sub>26</sub> O <sub>7</sub> Si |
| <sup>1</sup> H-NMR (400 MHz, CDCl <sub>3</sub> )                                   |           |      |                                   |                                                   |                                                   |
| dδ (ppm)                                                                           | Mult. (J) | Int. | Assignment                        |                                                   |                                                   |
| 0.086                                                                              | s         | 3    | Si (CH <sub>3</sub> )             |                                                   |                                                   |
| 0.11                                                                               | s         | 3    | Si (CH <sub>3</sub> )             |                                                   |                                                   |
| 0.90                                                                               | s         | 9    | Si (t-Bu)                         |                                                   |                                                   |
| 1.46                                                                               | d (6.8)   | 3    | L <sub>1</sub> (CH <sub>3</sub> ) |                                                   |                                                   |
| 1.56                                                                               | d (7.1)   | 3    | L <sub>2</sub> (CH <sub>3</sub> ) |                                                   |                                                   |
| 4.44                                                                               | q (6.8)   | 1    | L <sub>1</sub> (CH)               |                                                   |                                                   |
| 4.66                                                                               | d (16)    | 1    | G <sub>1</sub>                    |                                                   |                                                   |
| 4.81                                                                               | d (16)    | 1    | G <sub>1</sub>                    |                                                   |                                                   |
| 5.22                                                                               | q (7.1)   | 1    | L <sub>2</sub> (CH)               |                                                   |                                                   |

**Bn-LGL-Si** (4.20 g, 9.9 mmol) and Pd/C (0.42 g, 10 wt%) were dissolved in EtOAc (100 mL, 0.1 M) in a flame dried Schlenk flask and allowed to stir overnight at RT under 1 atm H<sub>2</sub>. Upon consumption of starting material by TLC, the reaction mixture was filtered over celite and concentrated *in vacuo* to yield a colorless oil (3.31 g, 99% yield).

JHS-3031; LGL-Si; CDC13; 1H; 400a; 16 Scans;  
11/12/16

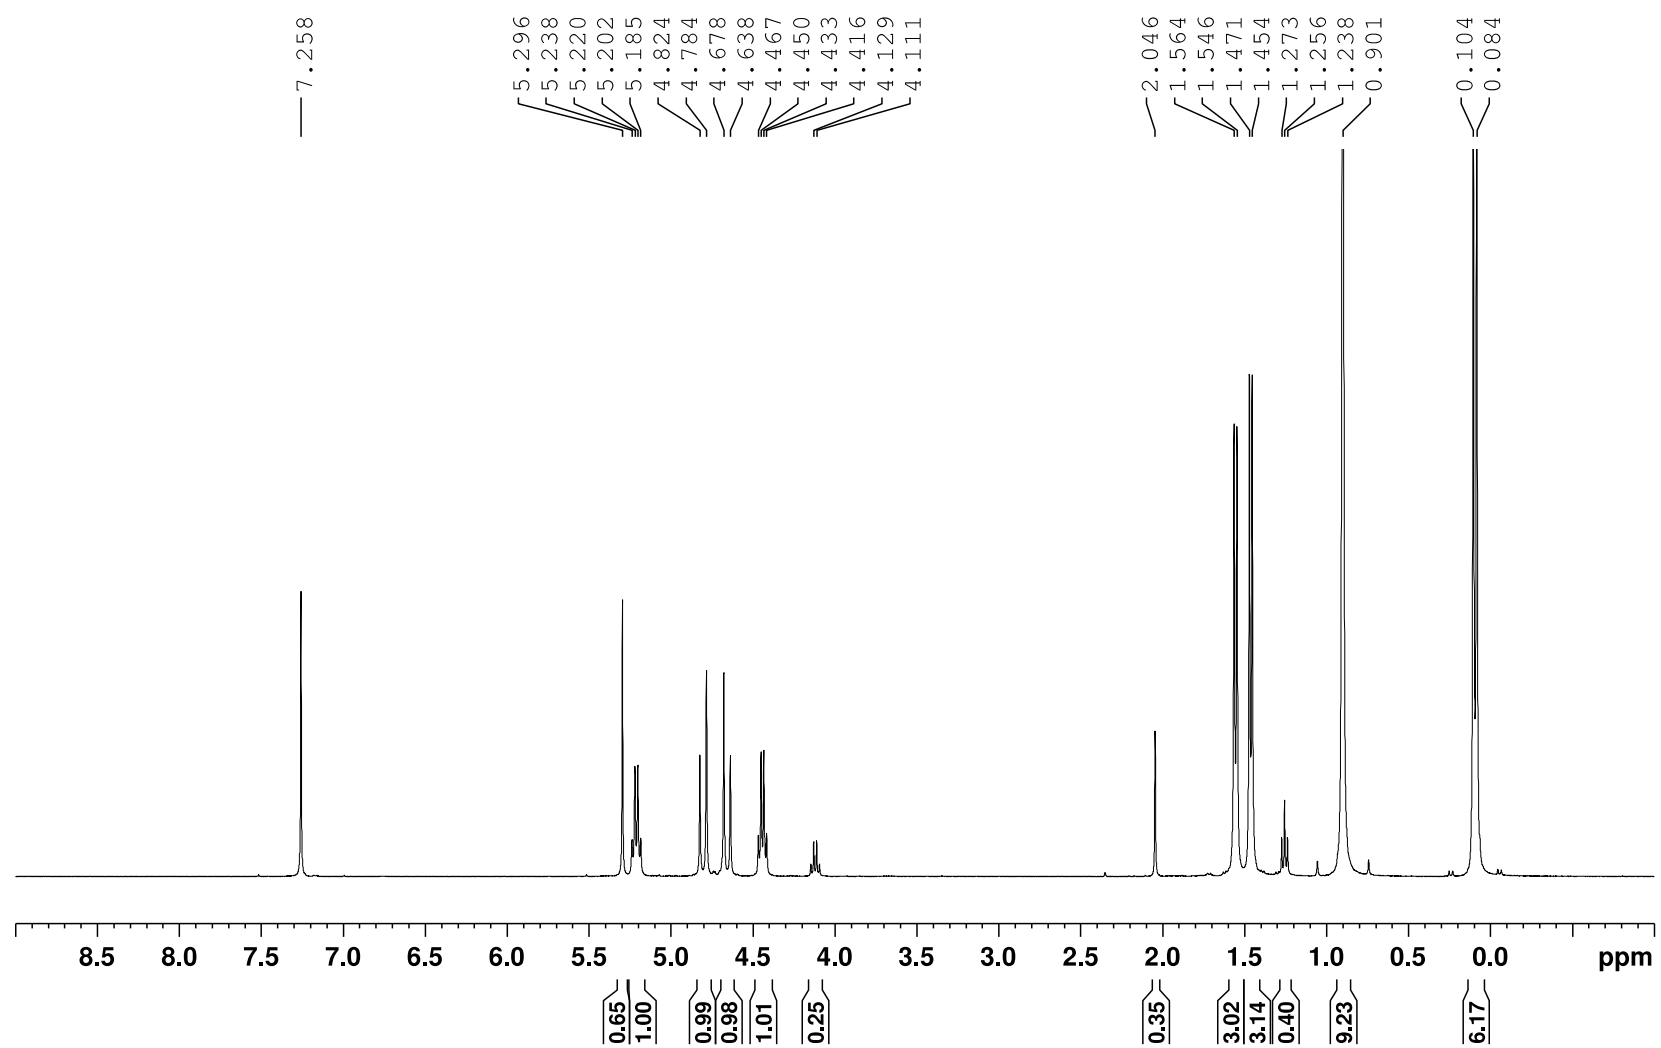

JHS-3031; LGL-Si; CDC13; 13C; 400a; 2048 Scans;  
11/12/16

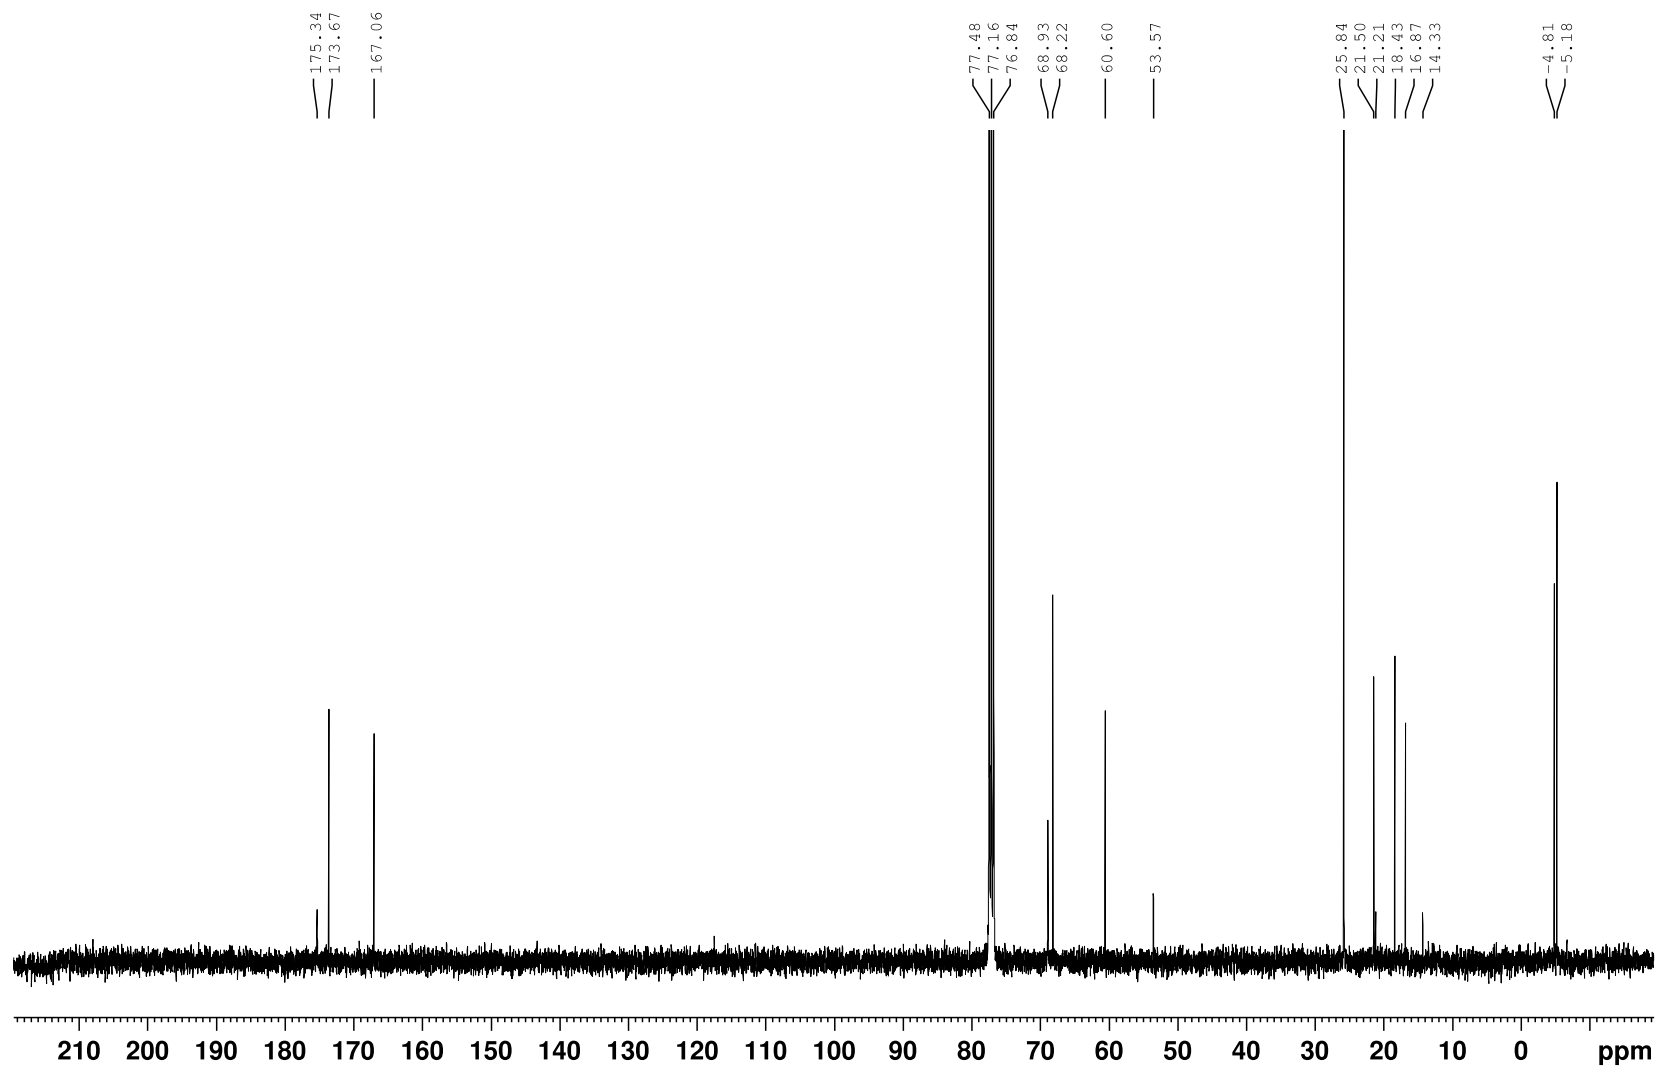

## 2.3 ALKYL LINKER CONTAINING COMPOUNDS

| Si-LGL-Alk-LGL-Si                                                                  |           |      |                                                             | <sup>13</sup> C-NMR (400 MHz, CDCl <sub>3</sub> ) |    | HRMS (ESI)                                                      |
|------------------------------------------------------------------------------------|-----------|------|-------------------------------------------------------------|---------------------------------------------------|----|-----------------------------------------------------------------|
| 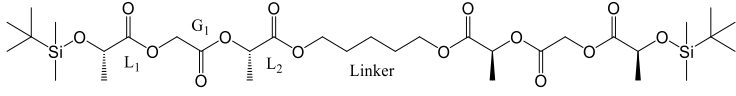 |           |      |                                                             | δ (ppm) + Assignment                              |    | <u>Calc. Mass</u>                                               |
|                                                                                    |           |      |                                                             |                                                   |    | 736.35 amu                                                      |
| <sup>1</sup> H-NMR (400 MHz, CDCl <sub>3</sub> )                                   |           |      |                                                             |                                                   |    | <u>Calc.</u>                                                    |
| dδ (ppm)                                                                           | Mult. (J) | Int. | Assignment                                                  |                                                   |    | [M + H] <sup>+</sup>                                            |
| 0.09                                                                               | s         | 6    | CH <sub>3</sub> (Si)                                        |                                                   |    | 737.35 amu                                                      |
| 0.11                                                                               | s         | 6    | CH <sub>3</sub> (Si)                                        |                                                   |    |                                                                 |
| 0.90                                                                               | s         | 18   | t-Bu (Si)                                                   |                                                   |    | <u>Found</u>                                                    |
| 1.46                                                                               | m         | 8    | CH <sub>2</sub> (Linker), CH <sub>3</sub> (L <sub>1</sub> ) |                                                   |    | [M + H] <sup>+</sup>                                            |
| 1.50                                                                               | d (7.0)   | 6    | L <sub>2</sub> (CH <sub>3</sub> )                           |                                                   |    | 737.36003 amu                                                   |
| 1.68                                                                               | m         | 4    | Linker (CH <sub>2</sub> )                                   |                                                   |    |                                                                 |
| 4.14                                                                               | m         | 4    | Linker (CH <sub>2</sub> )                                   |                                                   |    | <u>Composition</u>                                              |
| 4.42                                                                               | q (7.0)   | 2    | L <sub>1</sub> (CH)                                         |                                                   |    | C <sub>33</sub> H <sub>60</sub> O <sub>14</sub> Si <sub>2</sub> |
| 4.66                                                                               | d (16)    | 2    | G <sub>1</sub>                                              | 166.87                                            | CO |                                                                 |
| 4.79                                                                               | d (16)    | 2    | G <sub>1</sub>                                              | 170.02                                            | CO |                                                                 |
| 5.16                                                                               | q (7.1)   | 2    | L <sub>2</sub> (CH)                                         | 173.32                                            | CO |                                                                 |

Pentamethylene glycol was dried over sieves for two h. **LGL-Si** (1.00 g, 2.99 mmol, 2.3 eq) and dry pentamethylene glycol (0.135 g, 1.30 mmol, 1 eq) were dissolved in dry DCM (8 mL, 0.4 M) in a flame dried 100 mL Schlenk flask under nitrogen. DPTS (0.17 g, 0.59 mmol, 0.45 eq) and DCC (0.62 g, 3.0 mmol, 2.3 eq) were added and allowed to stir at RT overnight. Upon consumption of starting material by TLC, the reaction mixture was diluted with hexanes, filtered to remove DCU, concentrated, and crude oil was purified via column chromatography (silica, EtOAc/hexanes) to yield a colorless oil (5.27 g, 71% yield).



33-39; Si-LGL-Alk-LGL-Si; CDCl<sub>3</sub>; 1H; 400a; 16 Scans

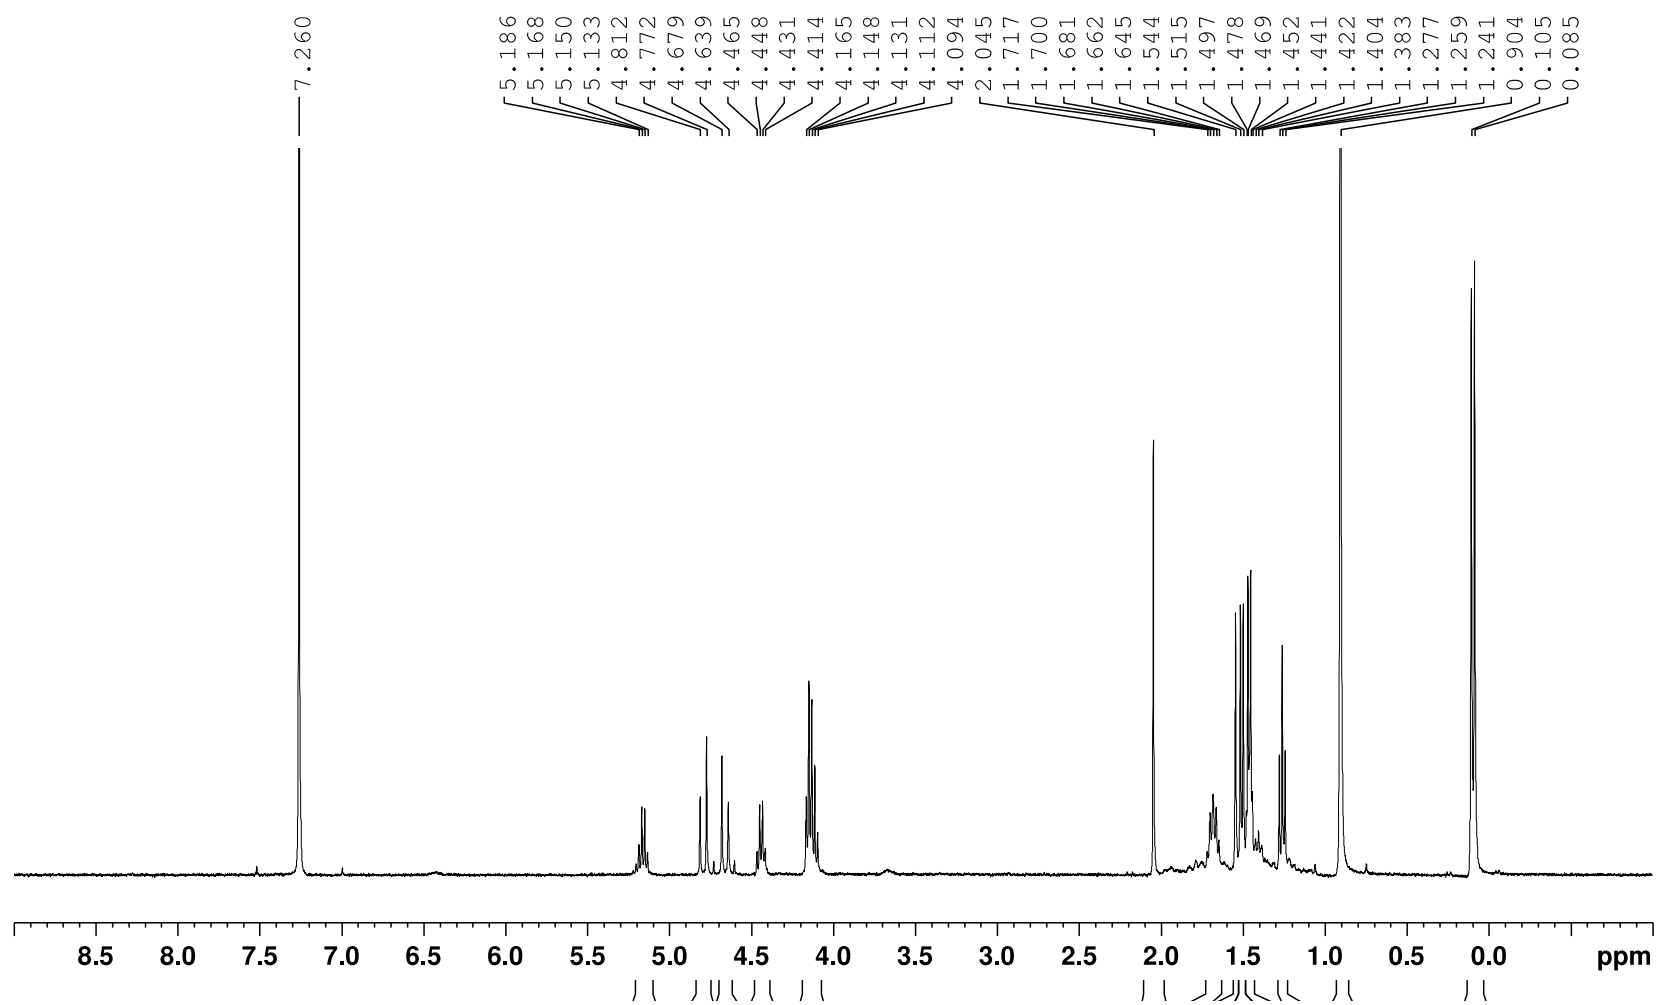

JHS-2043-Mixture; Si-LGL-Alk-LGL-Si; CDCl<sub>3</sub>; 13C; 400a;  
1024 Scans; 10/24/17

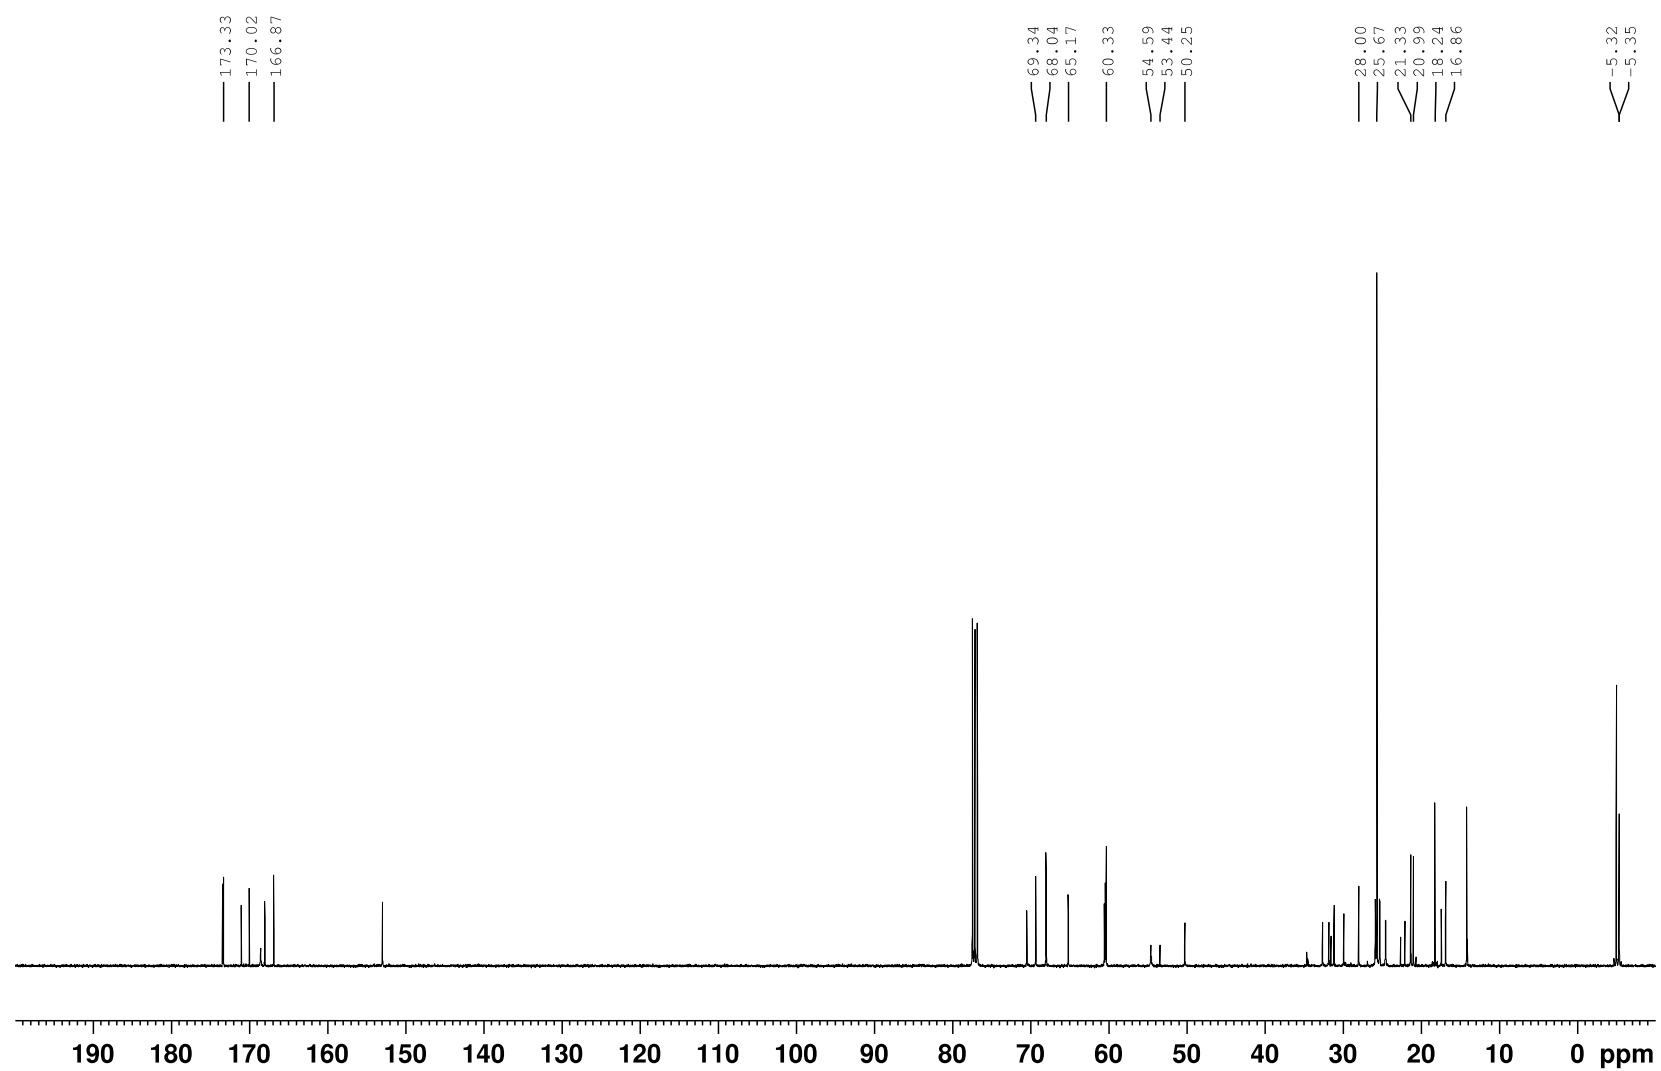

| <b>LGL-Alk-LGL</b>                                                                 |           |      |                                   | <sup>13</sup> C-NMR (400 MHz, CDCl <sub>3</sub> ) | HRMS (ESI)                                      |
|------------------------------------------------------------------------------------|-----------|------|-----------------------------------|---------------------------------------------------|-------------------------------------------------|
| 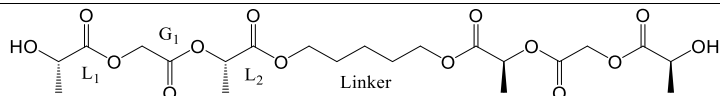 |           |      |                                   | $\delta$ (ppm) + Assignment                       | <u>Calc. Mass</u>                               |
|                                                                                    |           |      |                                   | 16.92 CH <sub>3</sub> (L)                         | 508.18 amu                                      |
|                                                                                    |           |      |                                   | 20.38 CH <sub>3</sub> (L)                         |                                                 |
|                                                                                    |           |      |                                   | 22.16 CH <sub>2</sub> (Linker)                    | <u>Calc.</u>                                    |
|                                                                                    |           |      |                                   | 28.05 CH <sub>2</sub> (Linker)                    | [M + H] <sup>+</sup>                            |
|                                                                                    |           |      |                                   | 60.93 CH <sub>2</sub> (G <sub>1</sub> )           | 509.18 amu                                      |
|                                                                                    |           |      |                                   | 65.39 CH (L)                                      |                                                 |
|                                                                                    |           |      |                                   | 66.80 CH (L)                                      | <u>Found</u>                                    |
|                                                                                    |           |      |                                   | 69.65 CH <sub>2</sub> (Linker)                    | [M + H] <sup>+</sup>                            |
|                                                                                    |           |      |                                   | 166.76 CO                                         | 509.18637 amu                                   |
|                                                                                    |           |      |                                   | 170.11 CO                                         |                                                 |
|                                                                                    |           |      |                                   | 174.98 CO                                         | <u>Composition</u>                              |
|                                                                                    |           |      |                                   |                                                   | C <sub>21</sub> H <sub>32</sub> O <sub>14</sub> |
| <sup>1</sup> H-NMR (400 MHz, CDCl <sub>3</sub> )                                   |           |      |                                   |                                                   |                                                 |
| d $\delta$ (ppm)                                                                   | Mult. (J) | Int. | Assignment                        |                                                   |                                                 |
| 1.41                                                                               | m         | 2    | Linker (CH <sub>2</sub> )         |                                                   |                                                 |
| 1.50                                                                               | d (7.0)   | 6    | L <sub>2</sub> (CH <sub>3</sub> ) |                                                   |                                                 |
| 1.52                                                                               | d (7.1)   | 6    | L <sub>1</sub> (CH <sub>3</sub> ) |                                                   |                                                 |
| 1.68                                                                               | m         | 4    | Linker (CH <sub>2</sub> )         |                                                   |                                                 |
| 2.85                                                                               | m         | 2    | L <sub>1</sub> (OH)               |                                                   |                                                 |
| 4.17                                                                               | t (3.8)   | 4    | Linker (CH <sub>2</sub> )         |                                                   |                                                 |
| 4.42                                                                               | m         | 2    | L <sub>2</sub> (CH)               |                                                   |                                                 |
| 4.74                                                                               | d (16)    | 2    | G <sub>1</sub>                    |                                                   |                                                 |
| 4.84                                                                               | d (16)    | 2    | G <sub>1</sub>                    |                                                   |                                                 |
| 5.16                                                                               | q (7.08)  | 2    | L <sub>1</sub> (CH)               |                                                   |                                                 |

AcOH (0.48 mL, 8.32 mmol, 16 eq) and TBAF (1 M in THF) (1.6 mL, 1.6 mmol, 3 eq) were dried over activated sieves for 2 h. **Si-LGL-Alk-LGL-Si** (0.386 g, 0.52 mmol, 1 eq) was dissolved in dry THF (13 mL, 0.04 M) in a flame dried Schlenk flask under nitrogen. AcOH and TBAF were added dropwise at 0°C, allowed to warm to RT and stir for 24 h. An additional equivalent of TBAF was added and allowed to stir for 2 more h. The reaction mixture was then diluted with brine and extracted with EtOAc 3x, the combined organic layers were washed with brine 3x, dried over MgSO<sub>4</sub> and concentrated. The crude oil was then purified via column chromatography (silica, EtOAc/hexanes) to yield a white solid (155 mg, 58% yield).

2074; LGL-Alk-LGL; CDCl<sub>3</sub>; 1H; 400a; 16 Scans; 8/1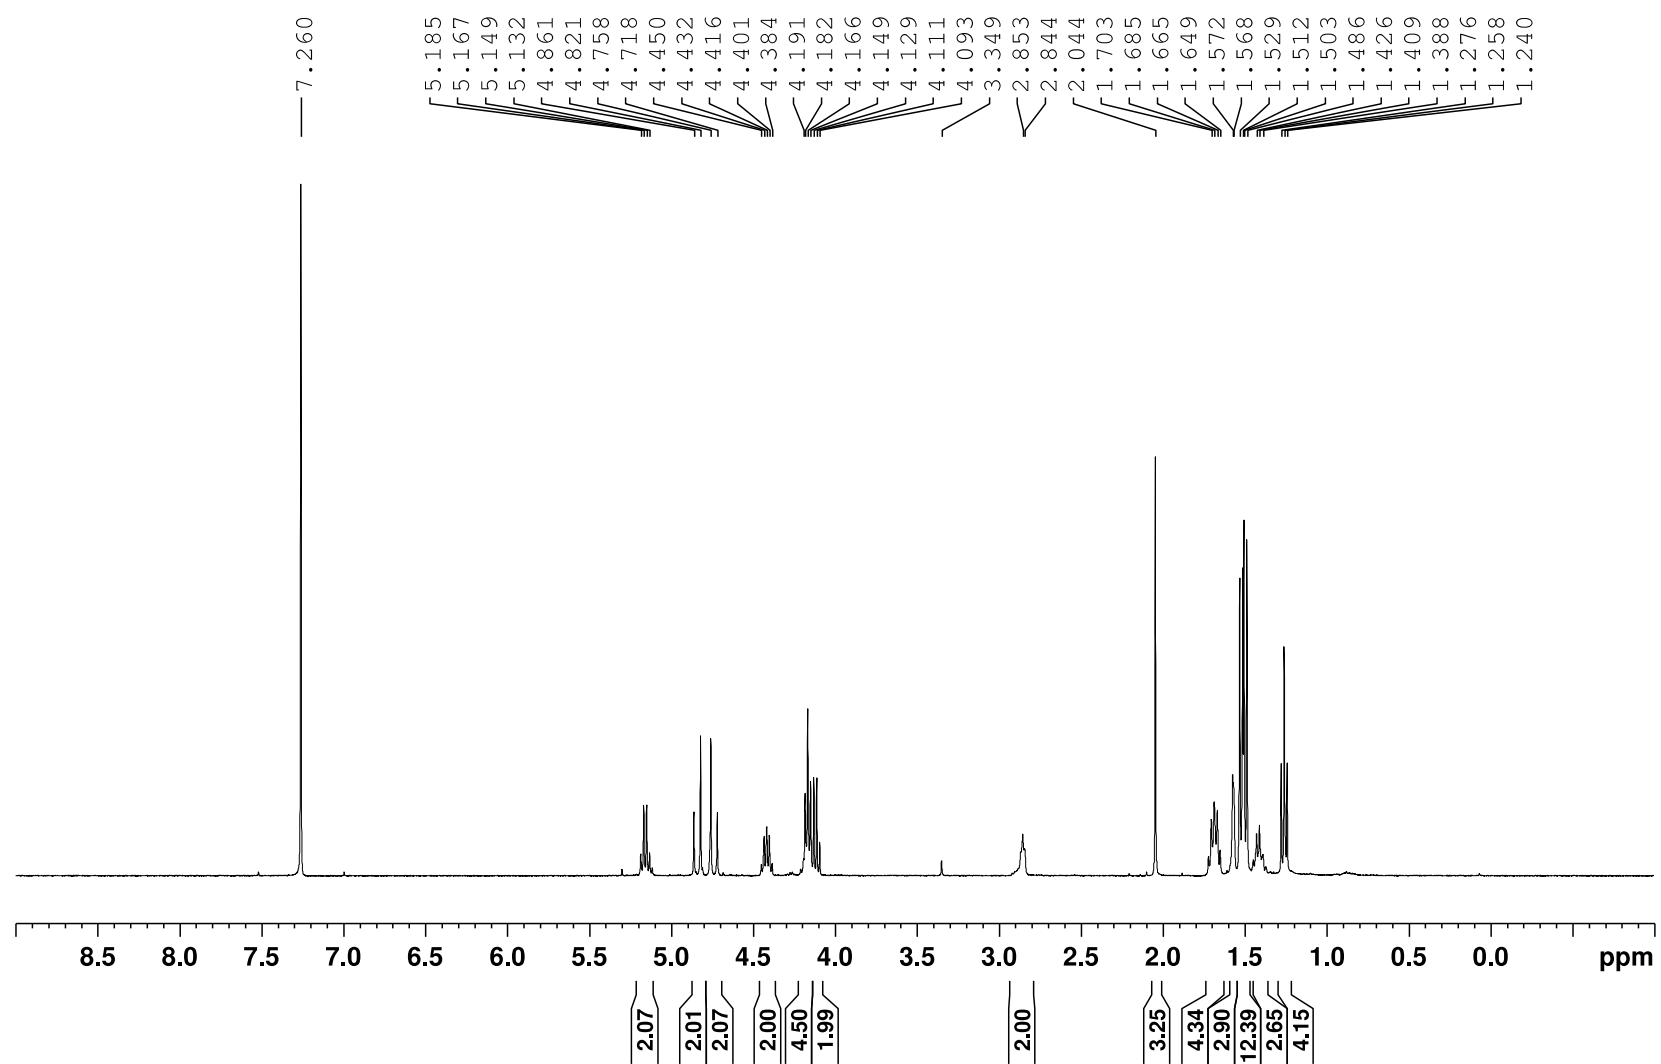JHS-2074; LGL-Alk-LGL; CDCl<sub>3</sub>; 13C; 400a; 2048 Scans; 8/10/16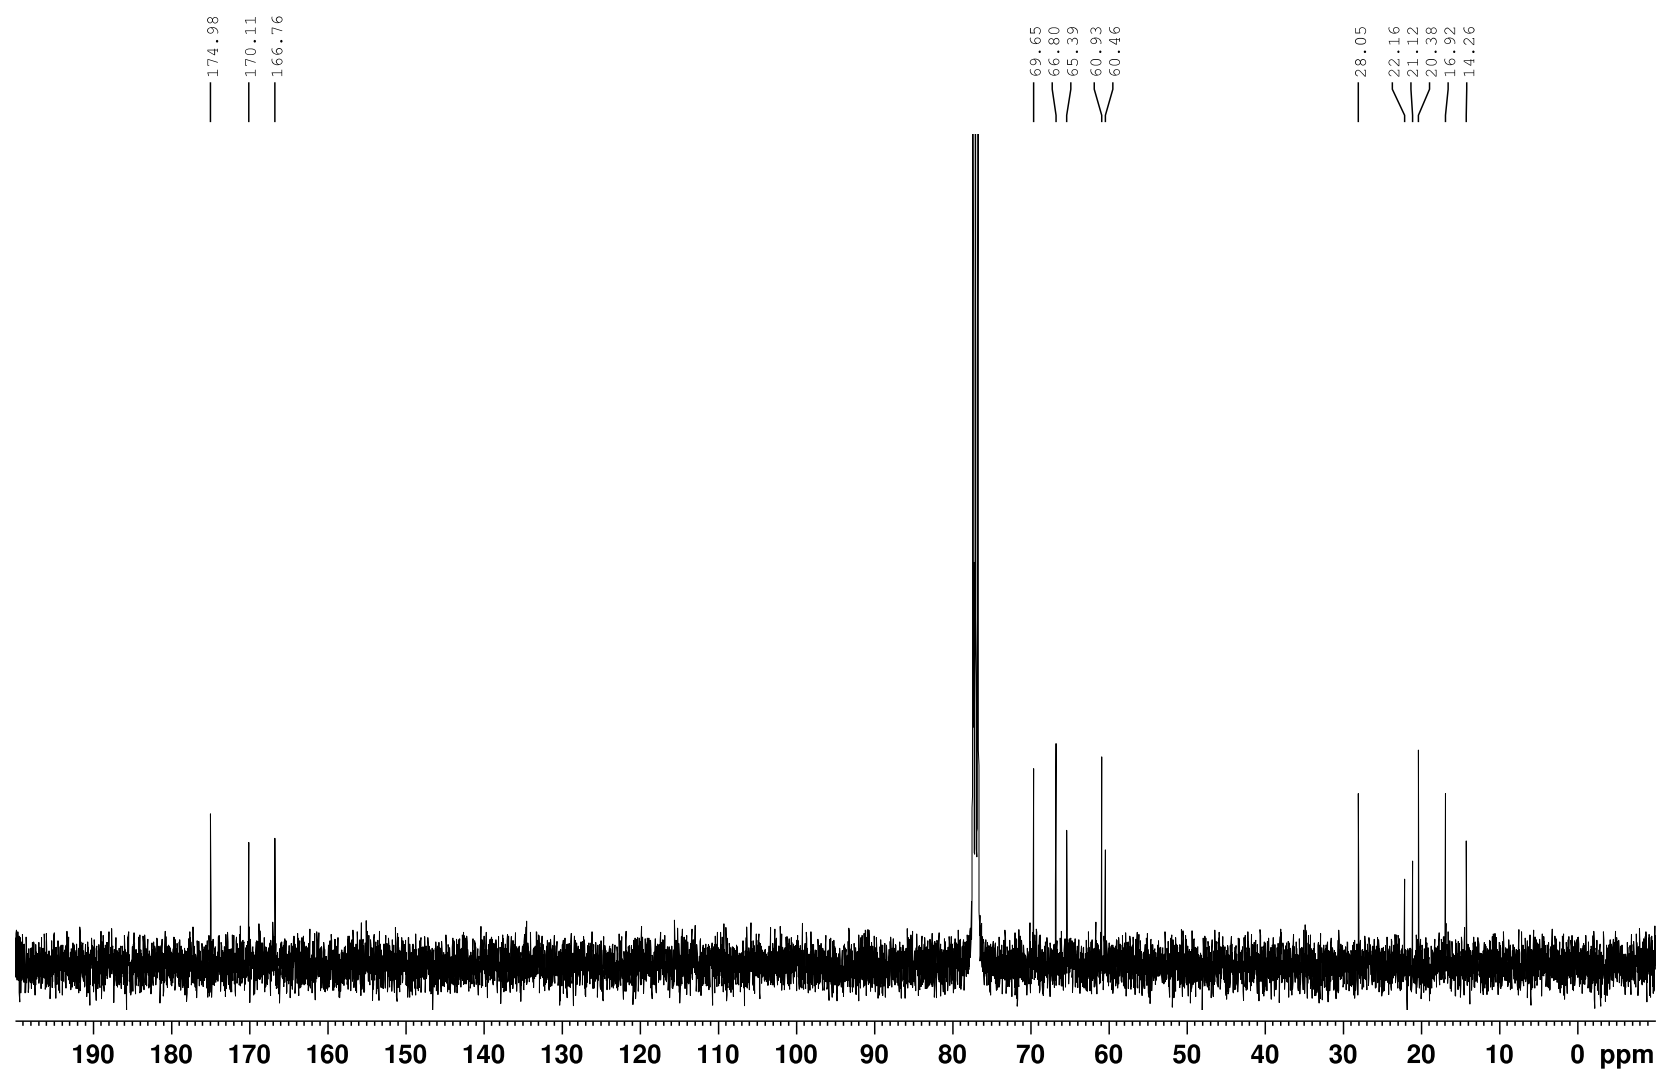

| <b>BLGL-Alk-LGLB</b>                                                               |           |      |                                                                | <sup>13</sup> C-NMR (400 MHz, CDCl <sub>3</sub> ) |                                   | HRMS (ESI)                                      |  |
|------------------------------------------------------------------------------------|-----------|------|----------------------------------------------------------------|---------------------------------------------------|-----------------------------------|-------------------------------------------------|--|
| 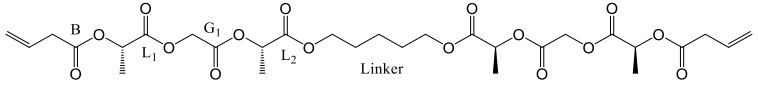 |           |      |                                                                | $\delta$ (ppm) + Assignment                       |                                   | <u>Calc. Mass</u>                               |  |
|                                                                                    |           |      |                                                                | 16.92                                             | CH <sub>3</sub> (L)               | 644.23 amu                                      |  |
|                                                                                    |           |      |                                                                | 16.96                                             | CH <sub>3</sub> (L)               |                                                 |  |
|                                                                                    |           |      |                                                                | 25.03                                             | CH <sub>2</sub> (Linker)          | <u>Calc.</u>                                    |  |
|                                                                                    |           |      |                                                                | 28.11                                             | CH <sub>2</sub> (Linker)          | [M + H] <sup>+</sup>                            |  |
|                                                                                    |           |      |                                                                | 38.68                                             | CH <sub>2</sub> (B)               | 645.23 amu                                      |  |
|                                                                                    |           |      |                                                                | 60.83                                             | CH <sub>2</sub> (G <sub>1</sub> ) |                                                 |  |
|                                                                                    |           |      |                                                                | 65.34                                             | CH (L)                            | <u>Found</u>                                    |  |
|                                                                                    |           |      |                                                                | 68.53                                             | CH (L)                            | [M + H] <sup>+</sup>                            |  |
|                                                                                    |           |      |                                                                | 69.56                                             | CH <sub>2</sub> (Linker)          | 645.23982 amu                                   |  |
|                                                                                    |           |      |                                                                | 119.09                                            | CH <sub>2</sub> (B)               |                                                 |  |
|                                                                                    |           |      |                                                                | 129.71                                            | CH (B)                            | <u>Composition</u>                              |  |
|                                                                                    |           |      |                                                                | 166.72                                            | CO                                | C <sub>29</sub> H <sub>40</sub> O <sub>16</sub> |  |
|                                                                                    |           |      |                                                                | 170.13                                            | CO                                |                                                 |  |
|                                                                                    |           |      |                                                                | 170.23                                            | CO                                |                                                 |  |
|                                                                                    |           |      |                                                                | 170.98                                            | CO                                |                                                 |  |
| <sup>1</sup> H-NMR (400 MHz, CDCl <sub>3</sub> )                                   |           |      |                                                                |                                                   |                                   |                                                 |  |
| d $\delta$ (ppm)                                                                   | Mult. (J) | Int. | Assignment                                                     |                                                   |                                   |                                                 |  |
| 1.41                                                                               | m         | 2    | Linker (CH <sub>2</sub> )                                      |                                                   |                                   |                                                 |  |
| 1.51                                                                               | d (7.0)   | 6    | L <sub>2</sub> (CH <sub>3</sub> )                              |                                                   |                                   |                                                 |  |
| 1.57                                                                               | d (7.1)   | 6    | L <sub>1</sub> (CH <sub>3</sub> )                              |                                                   |                                   |                                                 |  |
| 1.68                                                                               | m         | 4    | Linker (CH <sub>2</sub> )                                      |                                                   |                                   |                                                 |  |
| 3.18                                                                               | m         | 4    | B (CH <sub>2</sub> )                                           |                                                   |                                   |                                                 |  |
| 4.15                                                                               | t (3.8)   | 4    | Linker (CH <sub>2</sub> )                                      |                                                   |                                   |                                                 |  |
| 4.63                                                                               | d (16)    | 2    | G <sub>1</sub>                                                 |                                                   |                                   |                                                 |  |
| 4.87                                                                               | d (16)    | 2    | G <sub>1</sub>                                                 |                                                   |                                   |                                                 |  |
| 5.18                                                                               | m         | 8    | L <sub>1</sub> (CH), L <sub>2</sub> (CH), B (CH <sub>2</sub> ) |                                                   |                                   |                                                 |  |
| 5.93                                                                               | m         | 2    | B (CH)                                                         |                                                   |                                   |                                                 |  |

**LGL-Alk-LGL** (150 mg, 0.30 mmol, 1 eq) was dissolved in dry DCM (3 mL, 0.05 M) in an oven dried 20 mL vial under nitrogen. DPTS (39 mg, 0.13 mmol, 0.45 eq) and DCC (0.184 g, 0.89 mmol, 3 eq) were added sequentially. Butenoic acid (77 mg, 0.89 mmol, 3 eq) was then added dropwise and allowed to stir at RT overnight. Upon consumption of starting material by TLC, the reaction mixture was diluted with hexanes, washed with sodium bicarbonate 3x, dried over MgSO<sub>4</sub>, filtered to remove DCU and drying agent, concentrated, and crude solid was purified via column chromatography (silica, EtOAc/hexanes) to yield a thick brown oil (120 mg, 63% yield).



JHS-2076; BLGL-Alk-LGLB; CDC13; 1H; 400a;  
16 Scans; 8/16/16

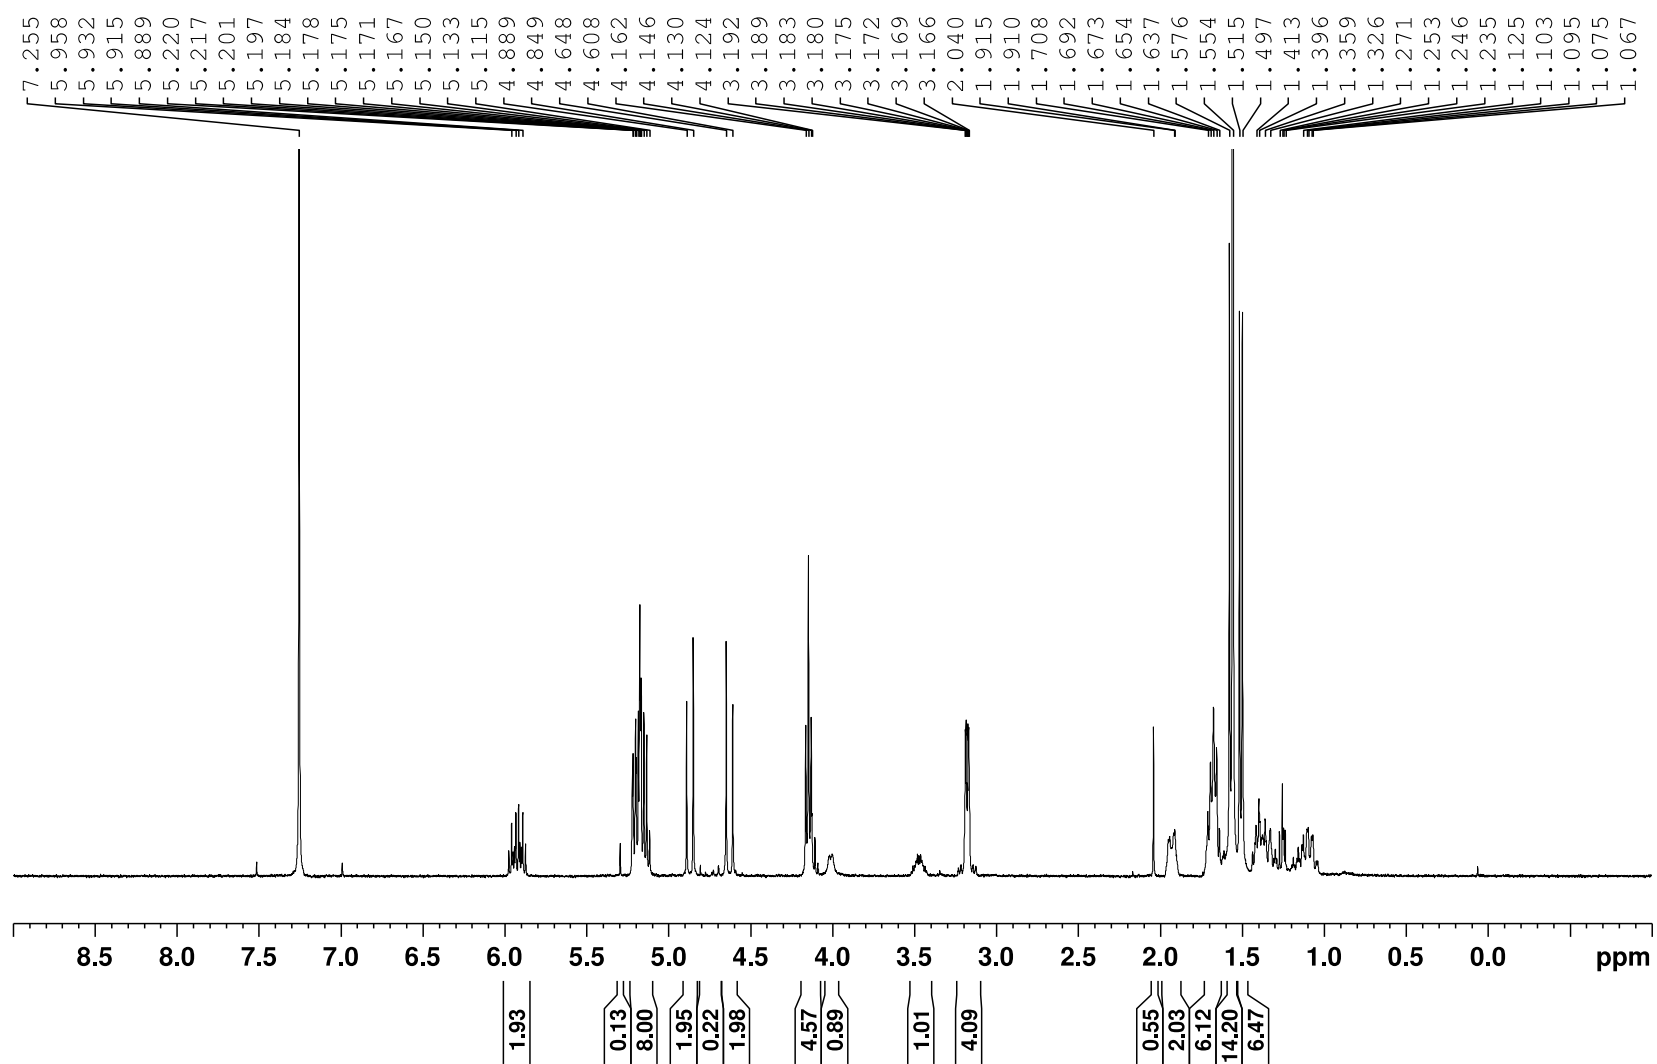

JHS-2076; BLGL-Alk-LGLB; CDC13; 13C; 400a;  
2048 Scans; 8/16/16

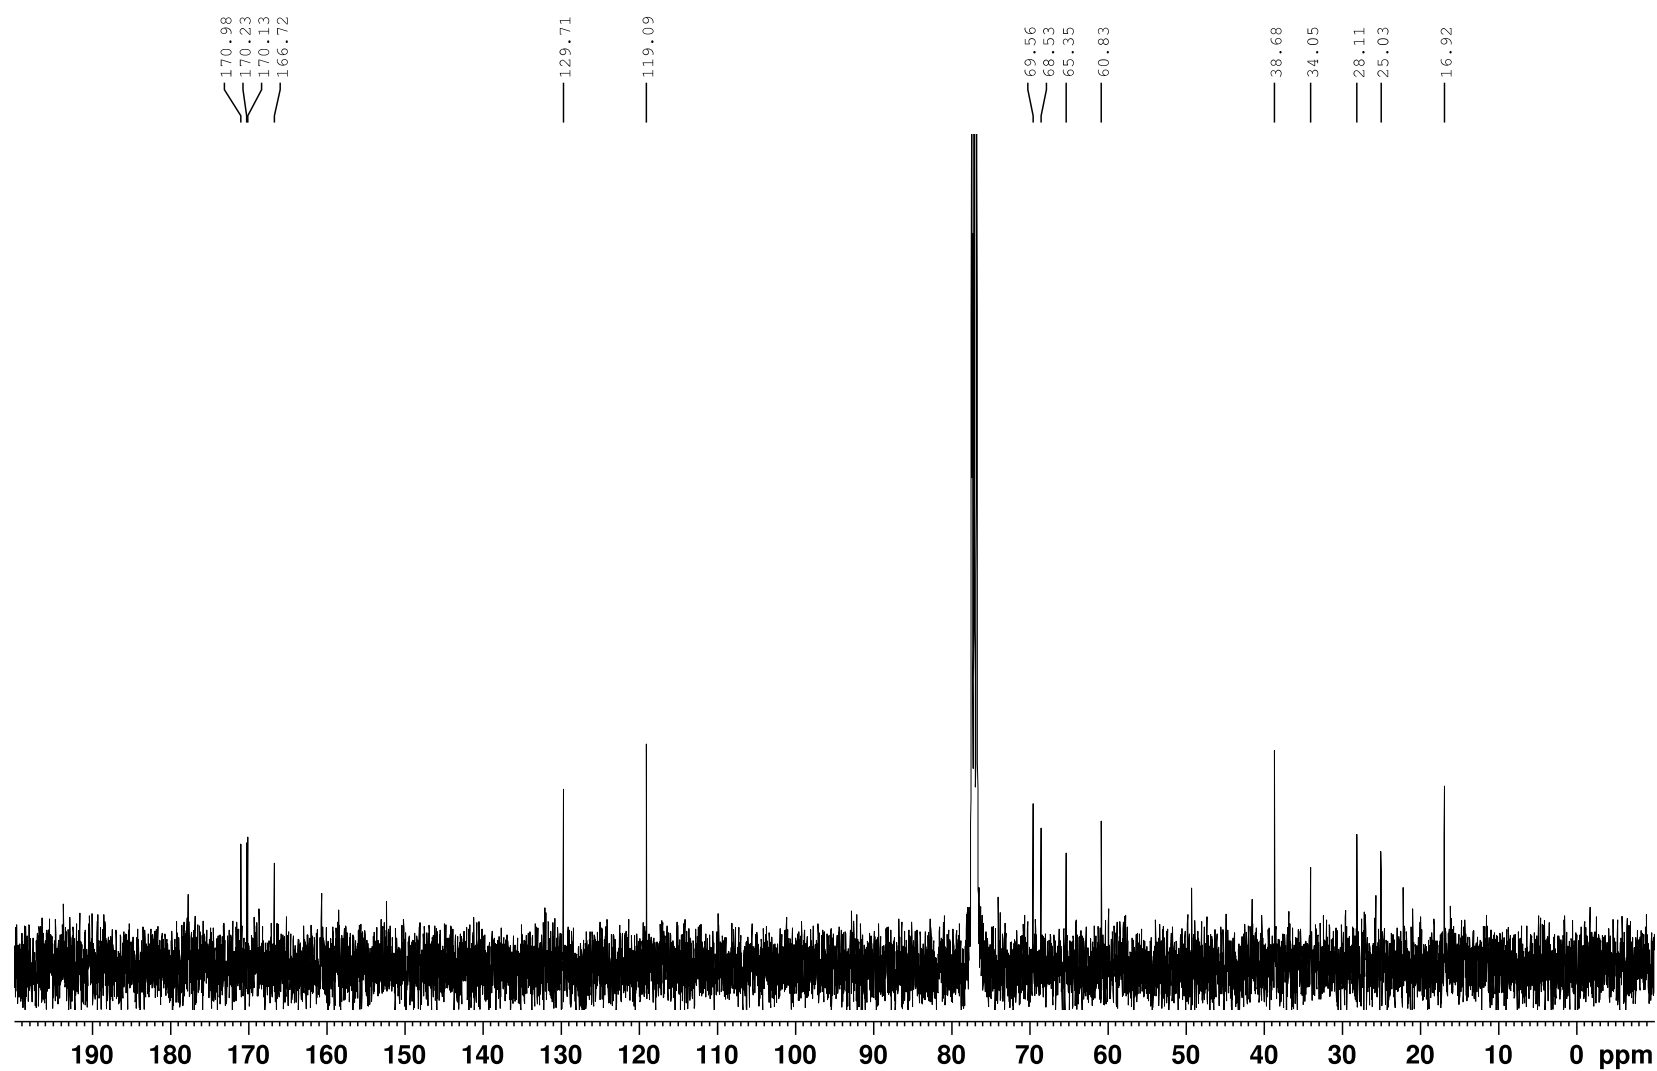

| Cyclic Alkyl Monomer                                                              |              |      |                                                    | <sup>13</sup> C-NMR (400 MHz, CDCl <sub>3</sub> ) | HRMS (ESI)                                      |
|-----------------------------------------------------------------------------------|--------------|------|----------------------------------------------------|---------------------------------------------------|-------------------------------------------------|
| 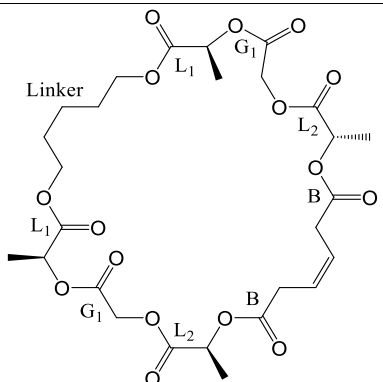 |              |      |                                                    | $\delta$ (ppm) + Assignment                       | <u>Calc. Mass</u>                               |
|                                                                                   |              |      |                                                    | 16.82 CH <sub>3</sub> (L)                         | 616.20 amu                                      |
|                                                                                   |              |      |                                                    | 16.85 CH <sub>3</sub> (L)                         |                                                 |
|                                                                                   |              |      |                                                    | 22.31 CH <sub>2</sub> (Linker)                    | <u>Calc.</u>                                    |
|                                                                                   |              |      |                                                    | 28.06 CH <sub>2</sub> (Linker)                    | [M + H] <sup>+</sup>                            |
|                                                                                   |              |      |                                                    | 37.49 CH <sub>2</sub> (Linker)                    | 617.20 amu                                      |
|                                                                                   |              |      |                                                    | 60.80 CH (L)                                      |                                                 |
|                                                                                   |              |      |                                                    | 65.32 CH (L)                                      | <u>Found</u>                                    |
|                                                                                   |              |      |                                                    | 68.49 CH <sub>2</sub> (G)                         | [M + H] <sup>+</sup>                            |
|                                                                                   |              |      |                                                    | 69.45 CH <sub>2</sub> (B)                         | 617.20615 amu                                   |
|                                                                                   |              |      |                                                    | 125.78 CH (B)                                     |                                                 |
|                                                                                   |              |      |                                                    | 166.53 CO                                         | <u>Composition</u>                              |
|                                                                                   |              |      |                                                    | 169.93 CO                                         | C <sub>27</sub> H <sub>36</sub> O <sub>16</sub> |
|                                                                                   |              |      |                                                    | 170.11 CO                                         |                                                 |
|                                                                                   |              |      |                                                    | 170.68 CO                                         |                                                 |
| <sup>1</sup> H-NMR (400 MHz, CDCl <sub>3</sub> )                                  |              |      |                                                    |                                                   |                                                 |
| d $\delta$ (ppm)                                                                  | Mult. (J)    | Int. | Assignment                                         |                                                   |                                                 |
| 1.42                                                                              | quin. (31.2) | 2    | Linker (CH <sub>2</sub> )                          |                                                   |                                                 |
| 1.50                                                                              | d (7.2)      | 6    | L <sub>1</sub> (CH <sub>3</sub> )                  |                                                   |                                                 |
| 1.54                                                                              | d (7.2)      | 6    | L <sub>2</sub> (CH <sub>3</sub> )                  |                                                   |                                                 |
| 1.68                                                                              | quin. (28)   | 4    | Linker (CH <sub>2</sub> $\beta$ -L <sub>1</sub> )  |                                                   |                                                 |
| 3.17                                                                              | m            | 4    | B (CH <sub>2</sub> )                               |                                                   |                                                 |
| 4.17                                                                              | m            | 4    | Linker (CH <sub>2</sub> $\alpha$ -L <sub>1</sub> ) |                                                   |                                                 |
| 4.67                                                                              | d (16)       | 2    | G <sub>1</sub>                                     |                                                   |                                                 |
| 4.80                                                                              | d (16)       | 2    | G <sub>1</sub>                                     |                                                   |                                                 |
| 5.14                                                                              | q (20.8)     | 2    | L <sub>1</sub> (CH)                                |                                                   |                                                 |
| 5.20                                                                              | q (21.2)     | 2    | L <sub>2</sub> (CH)                                |                                                   |                                                 |
| 5.79                                                                              | m            | 2    | B (CH)                                             |                                                   |                                                 |

**BLGL-Alk-LGLB** (640 mg, 0.92 mmol, 1 eq) was dissolved in dry DCM (185 mL, 0.001M) in a flame-dried Schlenk flask under nitrogen. A stock solution of Grubbs 2 (16 mg, 0.019 mmol, 10 mol%) in dry DCM was added and allowed to stir at RT overnight. Upon consumption of starting material by TLC, reaction mixture was quenched by addition of excess ethyl vinyl ether and stirring for 10 additional min. The reaction mixture was then concentrated and the crude solid was purified via column chromatography (silica, EtOAc/hexanes) to yield a thick brown oil (112 mg, 96% yield).

-Pure; LGLBLGL-AlkCyc; CDC13; 1H; 400a; 16 Scans;

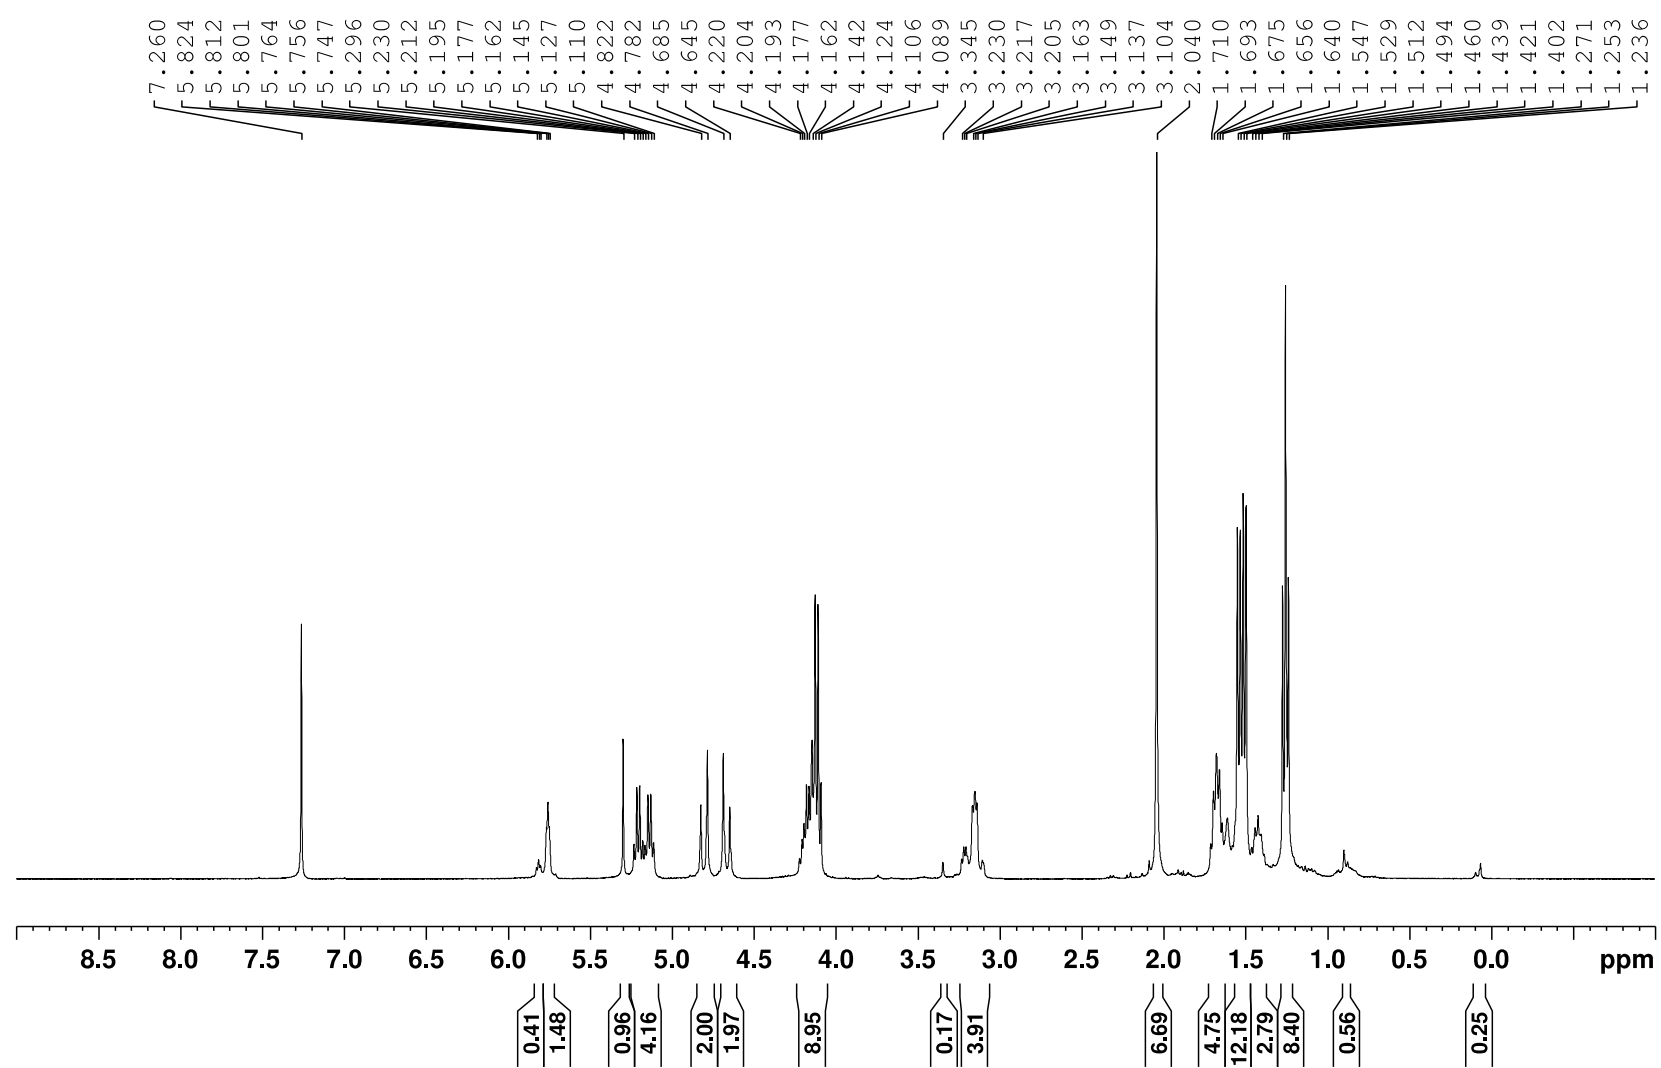

JHS-2061-Pure; LGLBLGL-AlkCyc; CDC13; 13C; 400a; 1024 Scans; 7/27/16

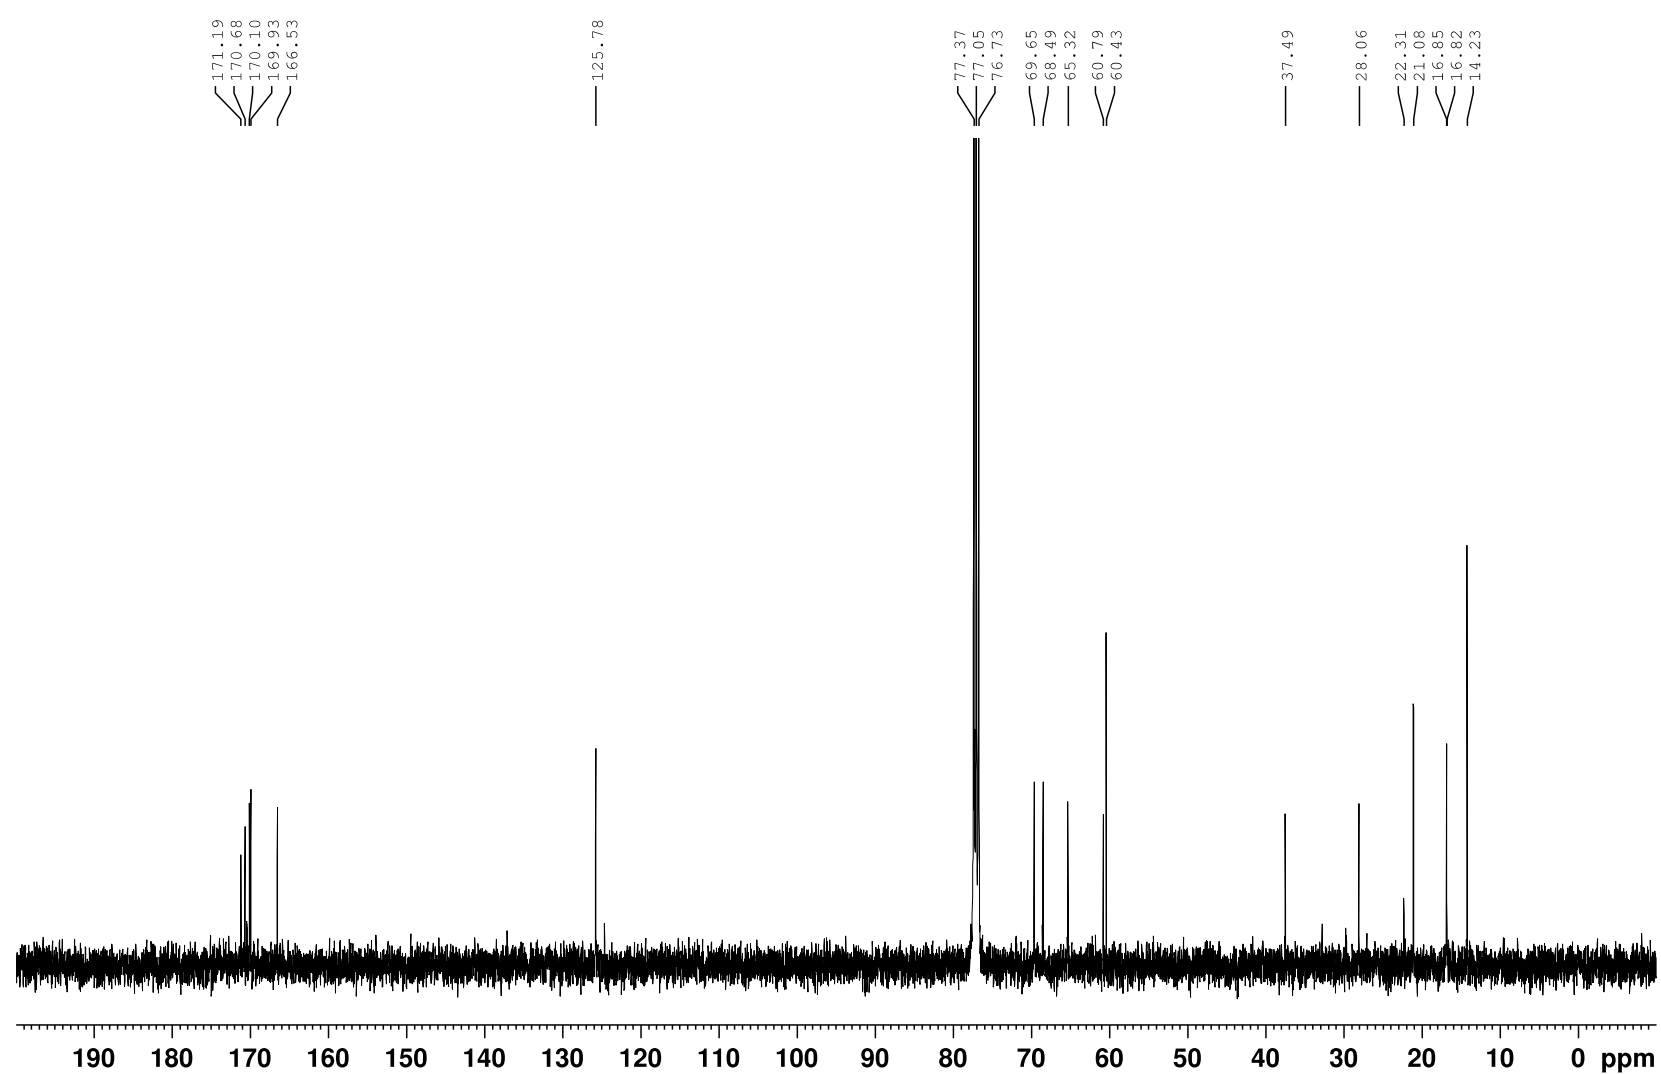

| <b>Poly(Alk)</b>                                                                   |           |      |                                          | <sup>13</sup> C-NMR (400 MHz, CDCl <sub>3</sub> ) |                                   | GPC             |
|------------------------------------------------------------------------------------|-----------|------|------------------------------------------|---------------------------------------------------|-----------------------------------|-----------------|
| 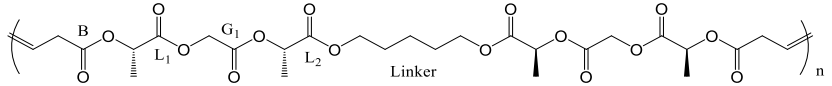 |           |      |                                          | $\delta$ (ppm) + Assignment                       |                                   | $M_n$           |
|                                                                                    |           |      |                                          | 16.92                                             | CH <sub>3</sub> (L)               | 26,868          |
|                                                                                    |           |      |                                          | 16.95                                             | CH <sub>3</sub> (L)               |                 |
|                                                                                    |           |      |                                          | 22.21                                             | CH <sub>2</sub> (Linker)          | $\underline{D}$ |
|                                                                                    |           |      |                                          | 28.13                                             | CH <sub>2</sub> (Linker)          | 1.40            |
|                                                                                    |           |      |                                          | 37.39                                             | CH <sub>2</sub> (Linker)          |                 |
|                                                                                    |           |      |                                          | 60.83                                             | CH <sub>2</sub> (G <sub>1</sub> ) |                 |
|                                                                                    |           |      |                                          | 65.33                                             | CH <sub>2</sub> (B)               |                 |
|                                                                                    |           |      |                                          | 68.59                                             | CH (L)                            |                 |
|                                                                                    |           |      |                                          | 69.55                                             | CH (L)                            |                 |
|                                                                                    |           |      |                                          | 124.39                                            | CH (B Cis)                        |                 |
|                                                                                    |           |      |                                          | 125.82                                            | CH (B Trans)                      |                 |
|                                                                                    |           |      |                                          | 166.70                                            | CO                                |                 |
|                                                                                    |           |      |                                          | 170.09                                            | CO                                |                 |
|                                                                                    |           |      |                                          | 170.17                                            | CO                                |                 |
|                                                                                    |           |      |                                          | 170.87                                            | CO                                |                 |
| <sup>1</sup> H-NMR (400 MHz, CDCl <sub>3</sub> )                                   |           |      |                                          |                                                   |                                   |                 |
| $\delta$ (ppm)                                                                     | Mult. (J) | Int. | Assignment                               |                                                   |                                   |                 |
| 1.40                                                                               | m         | 2    | Linker (CH <sub>2</sub> )                |                                                   |                                   |                 |
| 1.51                                                                               | d (7.0)   | 6    | L <sub>2</sub> (CH <sub>3</sub> )        |                                                   |                                   |                 |
| 1.57                                                                               | d (7.1)   | 6    | L <sub>1</sub> (CH <sub>3</sub> )        |                                                   |                                   |                 |
| 1.68                                                                               | m         | 4    | Linker (CH <sub>2</sub> )                |                                                   |                                   |                 |
| 3.19                                                                               | m         | 4    | B (CH <sub>2</sub> )                     |                                                   |                                   |                 |
| 4.15                                                                               | t (6.6)   | 4    | Linker (CH <sub>2</sub> )                |                                                   |                                   |                 |
| 4.63                                                                               | d (16)    | 2    | G <sub>1</sub>                           |                                                   |                                   |                 |
| 4.87                                                                               | d (16)    | 2    | G <sub>1</sub>                           |                                                   |                                   |                 |
| 5.16                                                                               | m         | 4    | L <sub>1</sub> (CH), L <sub>2</sub> (CH) |                                                   |                                   |                 |
| 5.72                                                                               | m         | 1.6  | B (CH) Trans                             |                                                   |                                   |                 |
| 5.81                                                                               | m         | 0.4  | B (CH) Cis                               |                                                   |                                   |                 |

**Cyclic Alkyl Monomer** (73 mg, 0.118 mmol, 1 eq.) was weighed in a flame dried 1 mL vial under nitrogen. A stock solution of Grubbs II (1 mg, 0.0012 mmol, 1 mol%) in dry DCM (5.8 mg/mL, 0.17 mL, 0.7M) was added to the vial, and the vial was shaken for four hours. The reaction mixture was quenched by the addition of excess ethyl vinyl ether and vortexing. Solution was concentrated to yield a crude solid polymer which was reprecipitated into a stirring solution of MeOH, and filtered to collect pure polymer as a brown solid (50 mg, 70% yield).



JHS-3041-Pure; Poly(Alk); CDCl<sub>3</sub>; 1H; 400a;  
16 Scans; 2/23/17

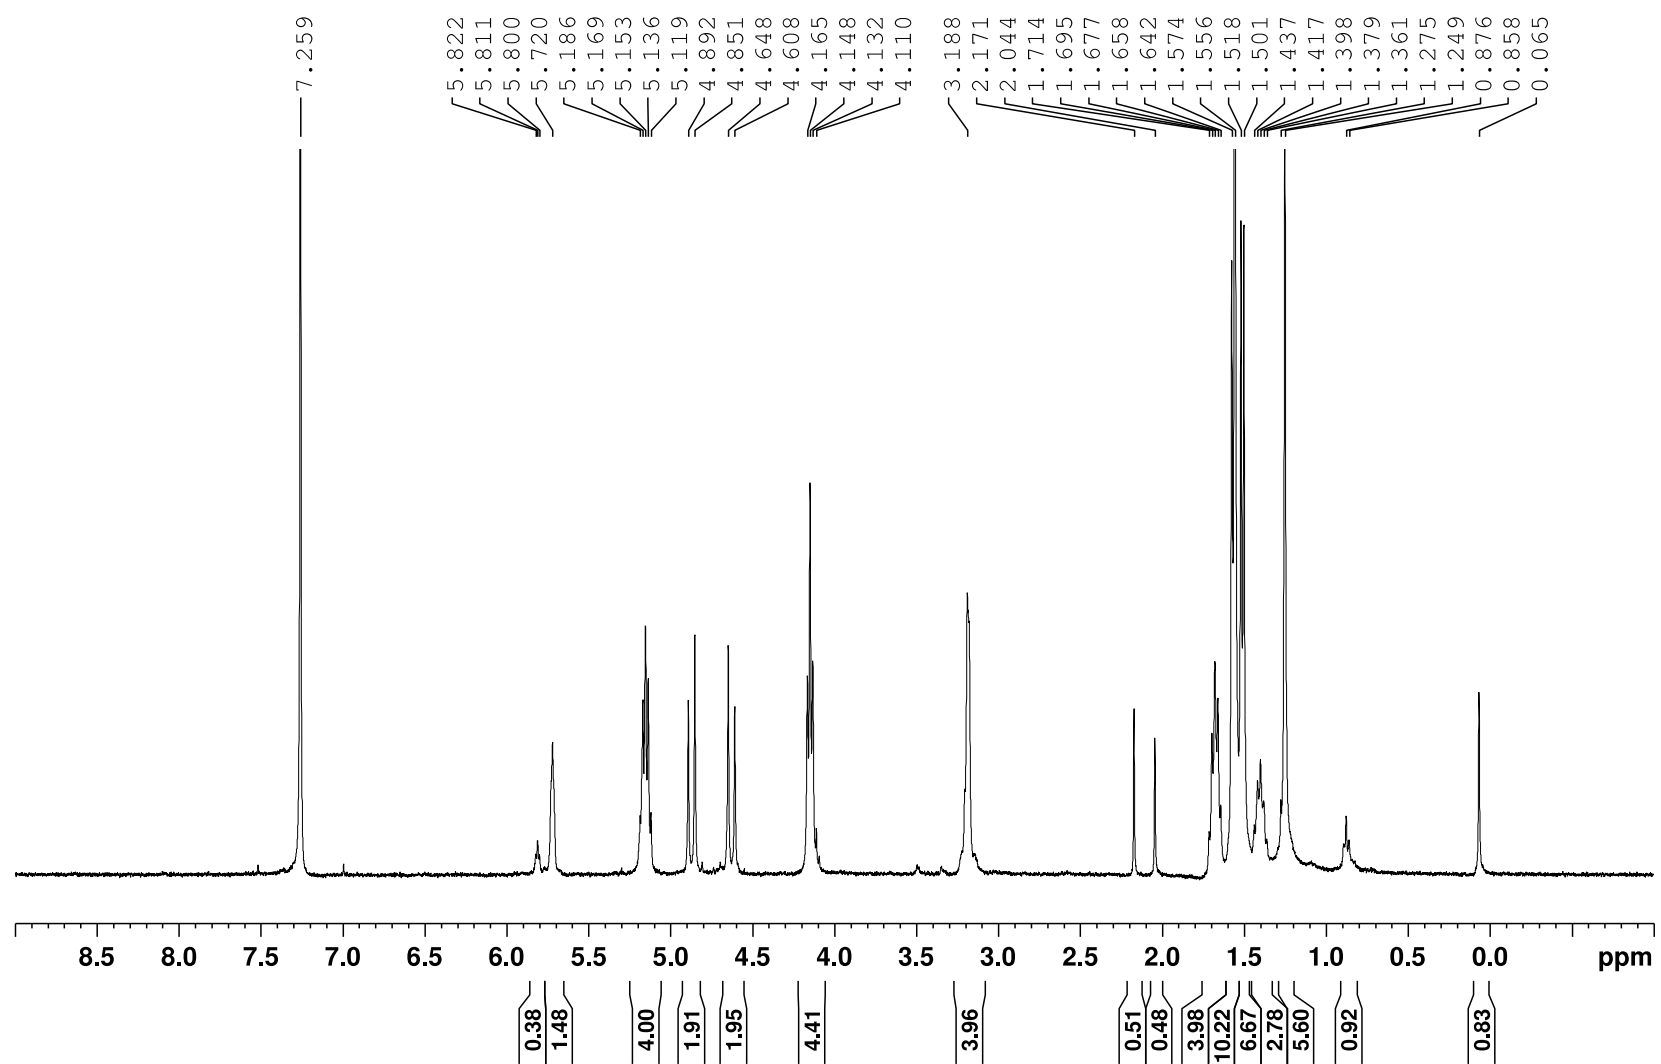

JHS-3041-500; Poly(Alk); CDCl<sub>3</sub>; 13C; 500;  
128 Scans; 10/27/17

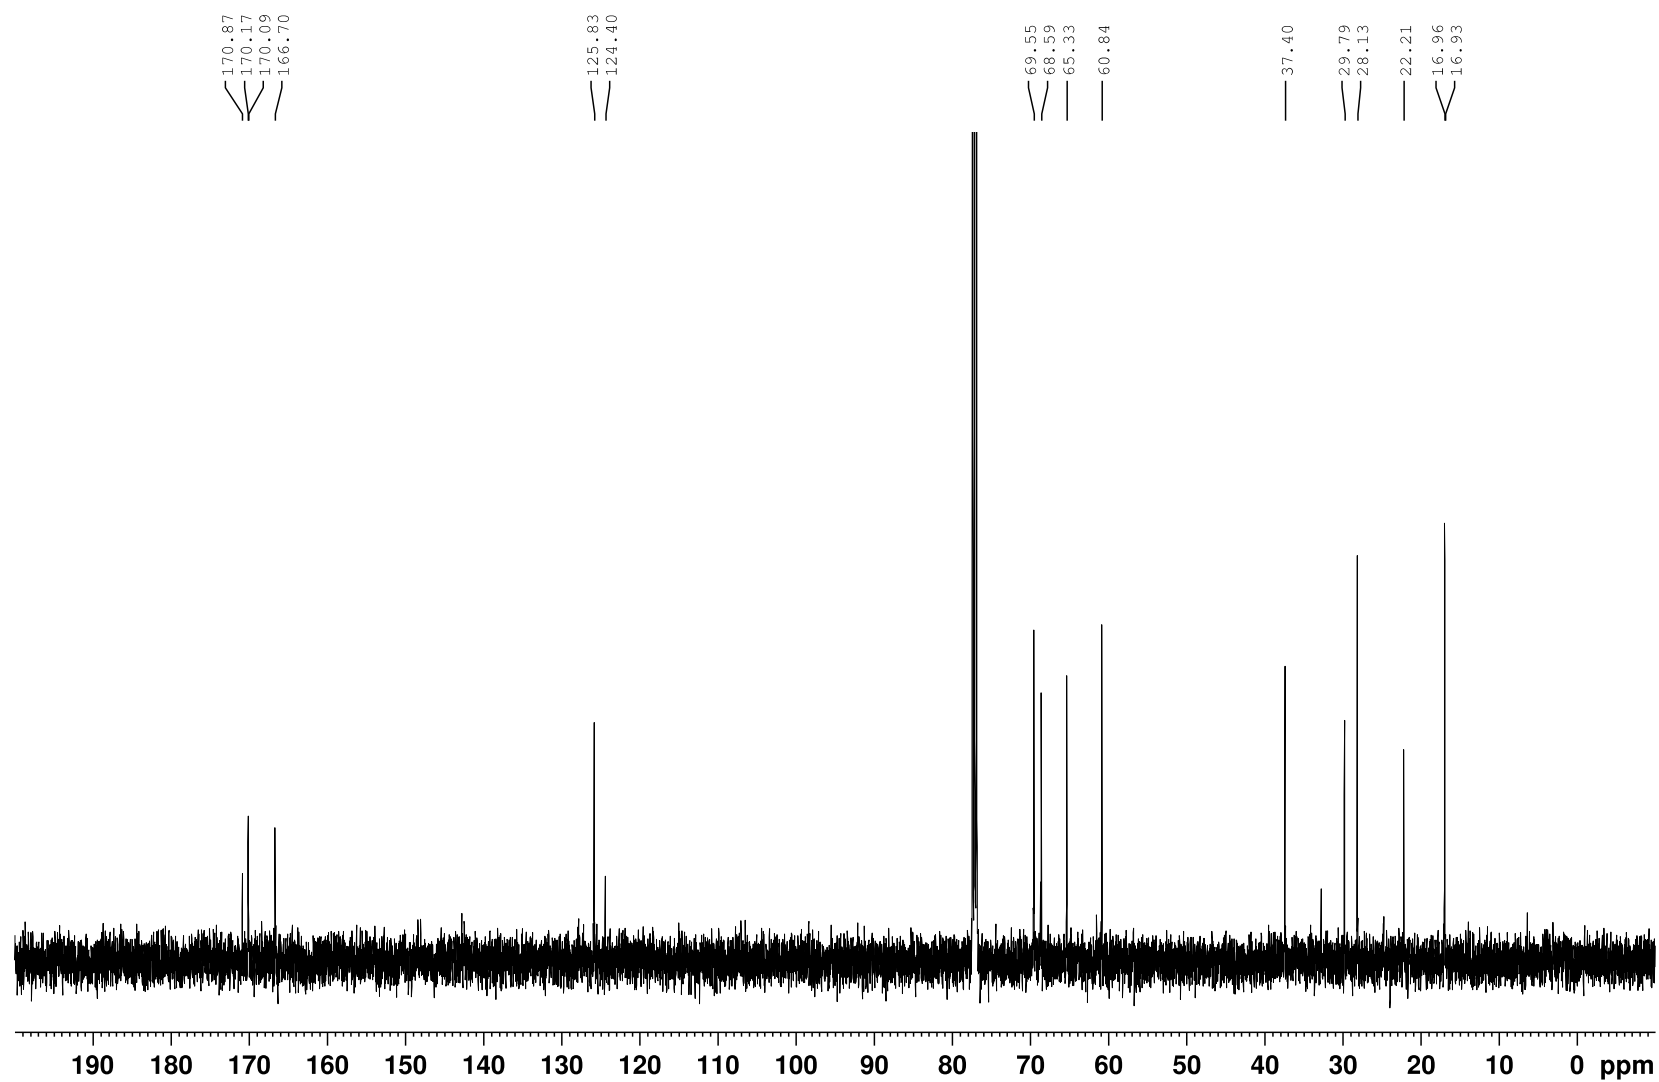

## 2.4 EG LINKER CONTAINING COMPOUNDS

| Si-LGL-EG-LGL-Si                                                                   |           |      |                                   | <sup>13</sup> C-NMR (400 MHz, CDCl <sub>3</sub> ) |                                   | HRMS (ESI)                                                      |
|------------------------------------------------------------------------------------|-----------|------|-----------------------------------|---------------------------------------------------|-----------------------------------|-----------------------------------------------------------------|
| 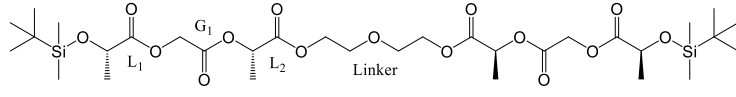 |           |      |                                   | δ (ppm) + Assignment                              |                                   | <u>Calc. Mass</u>                                               |
|                                                                                    |           |      |                                   | -5.40                                             | CH <sub>3</sub> (Si)              | 738.33 amu                                                      |
|                                                                                    |           |      |                                   | -5.02                                             | CH <sub>3</sub> (Si)              |                                                                 |
|                                                                                    |           |      |                                   | 16.74                                             | CH <sub>3</sub> (L)               | <u>Calc.</u>                                                    |
|                                                                                    |           |      |                                   | 18.17                                             | C (Si)                            | [M + H] <sup>+</sup>                                            |
|                                                                                    |           |      |                                   | 21.26                                             | CH <sub>3</sub> (L)               | 739.33 amu                                                      |
|                                                                                    |           |      |                                   | 25.62                                             | t-Bu (Si)                         |                                                                 |
|                                                                                    |           |      |                                   | 60.36                                             | CH <sub>2</sub> (G <sub>1</sub> ) | <u>Found</u>                                                    |
|                                                                                    |           |      |                                   | 64.26                                             | CH (L)                            | [M + H] <sup>+</sup>                                            |
|                                                                                    |           |      |                                   | 67.94                                             | CH <sub>2</sub> (Linker)          | 739.33935 amu                                                   |
|                                                                                    |           |      |                                   | 68.64                                             | CH (L)                            |                                                                 |
|                                                                                    |           |      |                                   | 69.23                                             | CH <sub>2</sub> (Linker)          | <u>Composition</u>                                              |
|                                                                                    |           |      |                                   | 166.81                                            | CO                                | C <sub>32</sub> H <sub>58</sub> O <sub>15</sub> Si <sub>2</sub> |
|                                                                                    |           |      |                                   | 169.85                                            | CO                                |                                                                 |
|                                                                                    |           |      |                                   | 173.23                                            | CO                                |                                                                 |
| <sup>1</sup> H-NMR (400 MHz, CDCl <sub>3</sub> )                                   |           |      |                                   |                                                   |                                   |                                                                 |
| dδ (ppm)                                                                           | Mult. (J) | Int. | Assignment                        |                                                   |                                   |                                                                 |
| 0.10                                                                               | s         | 6    | CH <sub>3</sub> (Si)              |                                                   |                                   |                                                                 |
| 0.12                                                                               | s         | 6    | CH <sub>3</sub> (Si)              |                                                   |                                   |                                                                 |
| 0.92                                                                               | s         | 18   | t-Bu (Si)                         |                                                   |                                   |                                                                 |
| 1.47                                                                               | d (6.8)   | 6    | CH <sub>3</sub> (L <sub>1</sub> ) |                                                   |                                   |                                                                 |
| 1.54                                                                               | d (7.1)   | 6    | L <sub>2</sub> (CH <sub>3</sub> ) |                                                   |                                   |                                                                 |
| 3.71                                                                               | t (4.7)   | 4    | Linker (CH <sub>2</sub> )         |                                                   |                                   |                                                                 |
| 4.31                                                                               | m         | 4    | Linker (CH <sub>2</sub> )         |                                                   |                                   |                                                                 |
| 4.46                                                                               | q (6.8)   | 2    | L <sub>1</sub> (CH)               |                                                   |                                   |                                                                 |
| 4.68                                                                               | d (16)    | 2    | G <sub>1</sub>                    |                                                   |                                   |                                                                 |
| 4.81                                                                               | d (16)    | 2    | G <sub>1</sub>                    |                                                   |                                   |                                                                 |
| 5.20                                                                               | q (7.1)   | 2    | L <sub>2</sub> (CH)               |                                                   |                                   |                                                                 |

Diethylene glycol was dried over sieves for two h. **LGL-Si** (1.1 g, 3.3 mmol, 2.3 eq) was dissolved in dry DCM (10 mL, 0.4 M), and added to a flame-dried vial under nitrogen. Dry diethylene glycol (0.151 g, 1.43 mmol, 1 eq), DPTS (0.19 g, 0.65 mmol, 0.45 eq) and DCC (0.68 g, 3.3 mmol, 2.3 eq) were then added to the reaction mixture sequentially and allowed to stir at RT overnight. Upon consumption of starting material by TLC, the reaction mixture was diluted with hexanes and filtered to remove DCU, concentrated and crude oil was purified via column chromatography (silica, EtOAc/hexanes) to yield a colorless oil (0.755 g, 71% yield).

pot3; Si-LGL-EG-LGL-Si; CDCl<sub>3</sub>; 1H; 400a; 16 Scan

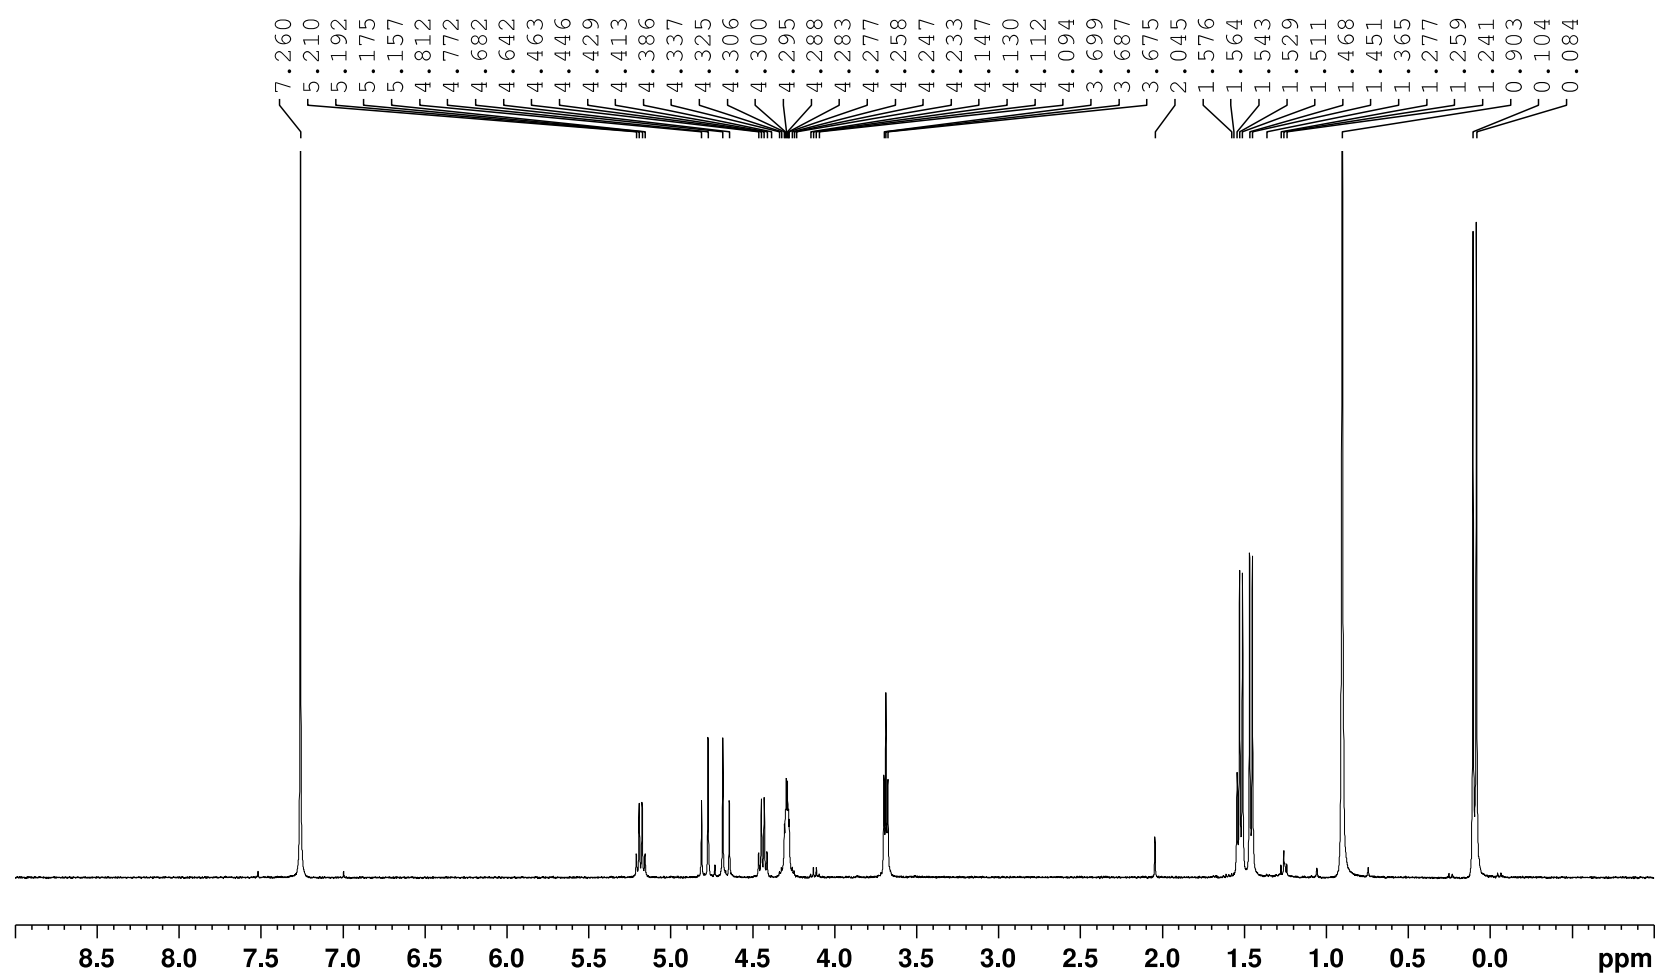

JHS-2055; Si-LGL-EG-LGL-Si; CDCl<sub>3</sub>; 13C; 400a;  
1024 Scans; 10/24/17

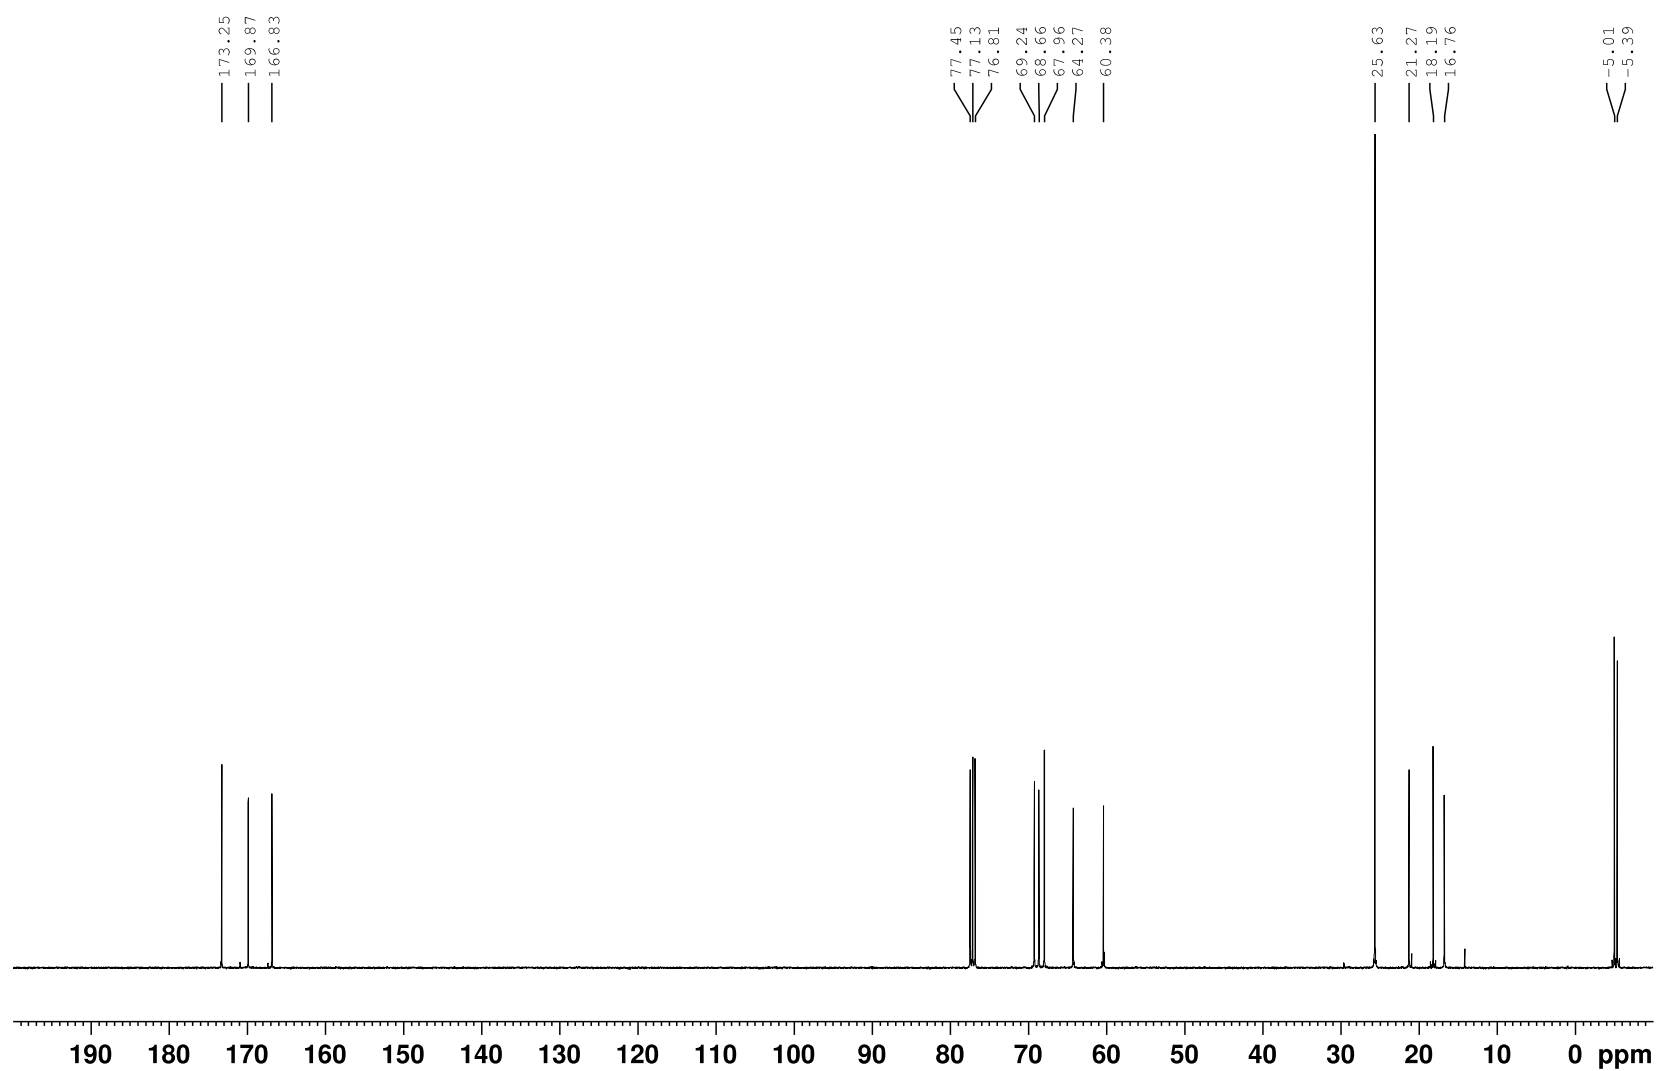

| <b>LGL-EG-LGL</b>                                                                  |           |      |                                   | <sup>13</sup> C-NMR (400 MHz, CDCl <sub>3</sub> )                         | HRMS (ESI)                                                            |
|------------------------------------------------------------------------------------|-----------|------|-----------------------------------|---------------------------------------------------------------------------|-----------------------------------------------------------------------|
| 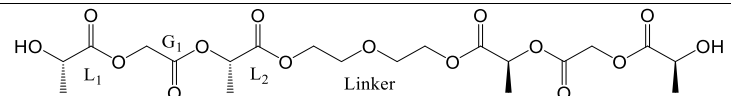 |           |      |                                   | <sup>13</sup> C-NMR (400 MHz, CDCl <sub>3</sub> )<br>δ (ppm) + Assignment | <u>Calc. Mass</u><br>510.16 amu                                       |
| <sup>1</sup> H-NMR (300 MHz, CDCl <sub>3</sub> )                                   |           |      |                                   |                                                                           | <u>Calc.</u><br>[M + H] <sup>+</sup><br>511.16 amu                    |
| dδ (ppm)                                                                           | Mult. (J) | Int. | Assignment                        | δ (ppm) + Assignment                                                      | <u>Found</u><br>[M + H] <sup>+</sup><br>amu                           |
| 1.49                                                                               | d (7.0)   | 6    | L <sub>1</sub> (CH <sub>3</sub> ) | 16.93 CH <sub>3</sub> (L)                                                 | <u>Composition</u><br>C <sub>20</sub> H <sub>30</sub> O <sub>15</sub> |
| 1.53                                                                               | d (7.0)   | 6    | L <sub>2</sub> (CH <sub>3</sub> ) | 20.49 CH <sub>3</sub> (L)                                                 |                                                                       |
| 2.86                                                                               | d (5.6)   | 2    | L <sub>1</sub> (OH)               | 60.98 CH <sub>2</sub> (Linker)                                            |                                                                       |
| 3.69                                                                               | t (5.0)   | 4    | Linker (CH <sub>2</sub> )         | 64.55 CH <sub>2</sub> (Linker)                                            |                                                                       |
| 4.31                                                                               | t (5.0)   | 4    | Linker (CH <sub>2</sub> )         | 66.86 CH <sub>2</sub> (G <sub>1</sub> )                                   |                                                                       |
| 4.41                                                                               | m         | 2    | L <sub>1</sub> (CH)               | 68.82 CH (L)                                                              |                                                                       |
| 4.74                                                                               | d (16)    | 2    | G <sub>1</sub>                    | 69.64 CH (L)                                                              |                                                                       |
| 4.84                                                                               | d (16)    | 2    | G <sub>1</sub>                    | 166.86 CO                                                                 |                                                                       |
| 5.19                                                                               | q (7.0)   | 2    | L <sub>2</sub> (CH)               | 170.09 CO                                                                 |                                                                       |
|                                                                                    |           |      |                                   | 175.02 CO                                                                 |                                                                       |

AcOH (0.62 mL, 10.8 mmol, 16 eq) and TBAF (1 M in THF) (2.03 mL, 2.03 mmol, 3 eq) were dried over activated sieves for 2 h. **Si-LGL-EG-LGL-Si** (0.498 g, 0.52 mmol, 1 eq) was dissolved in dry THF (17 mL, 0.04 M) in a flame dried Schlenk flask under nitrogen. AcOH and TBAF were added dropwise at 0°C, allowed to warm to RT and stir for 24 h. An additional equivalent of TBAF was added and allowed to stir for 2 more h. The reaction mixture was then diluted with brine and extracted with EtOAc 3x, the combined organic layers were washed with brine 3x, dried over MgSO<sub>4</sub> and concentrated. The crude oil was then purified via column chromatography (silica, EtOAc/hexanes) to yield a white solid (250 mg, 73% yield).

-2071; LGL-EG-LGL; CDCl<sub>3</sub>; 1H; 300; 16 Scans; 8/4

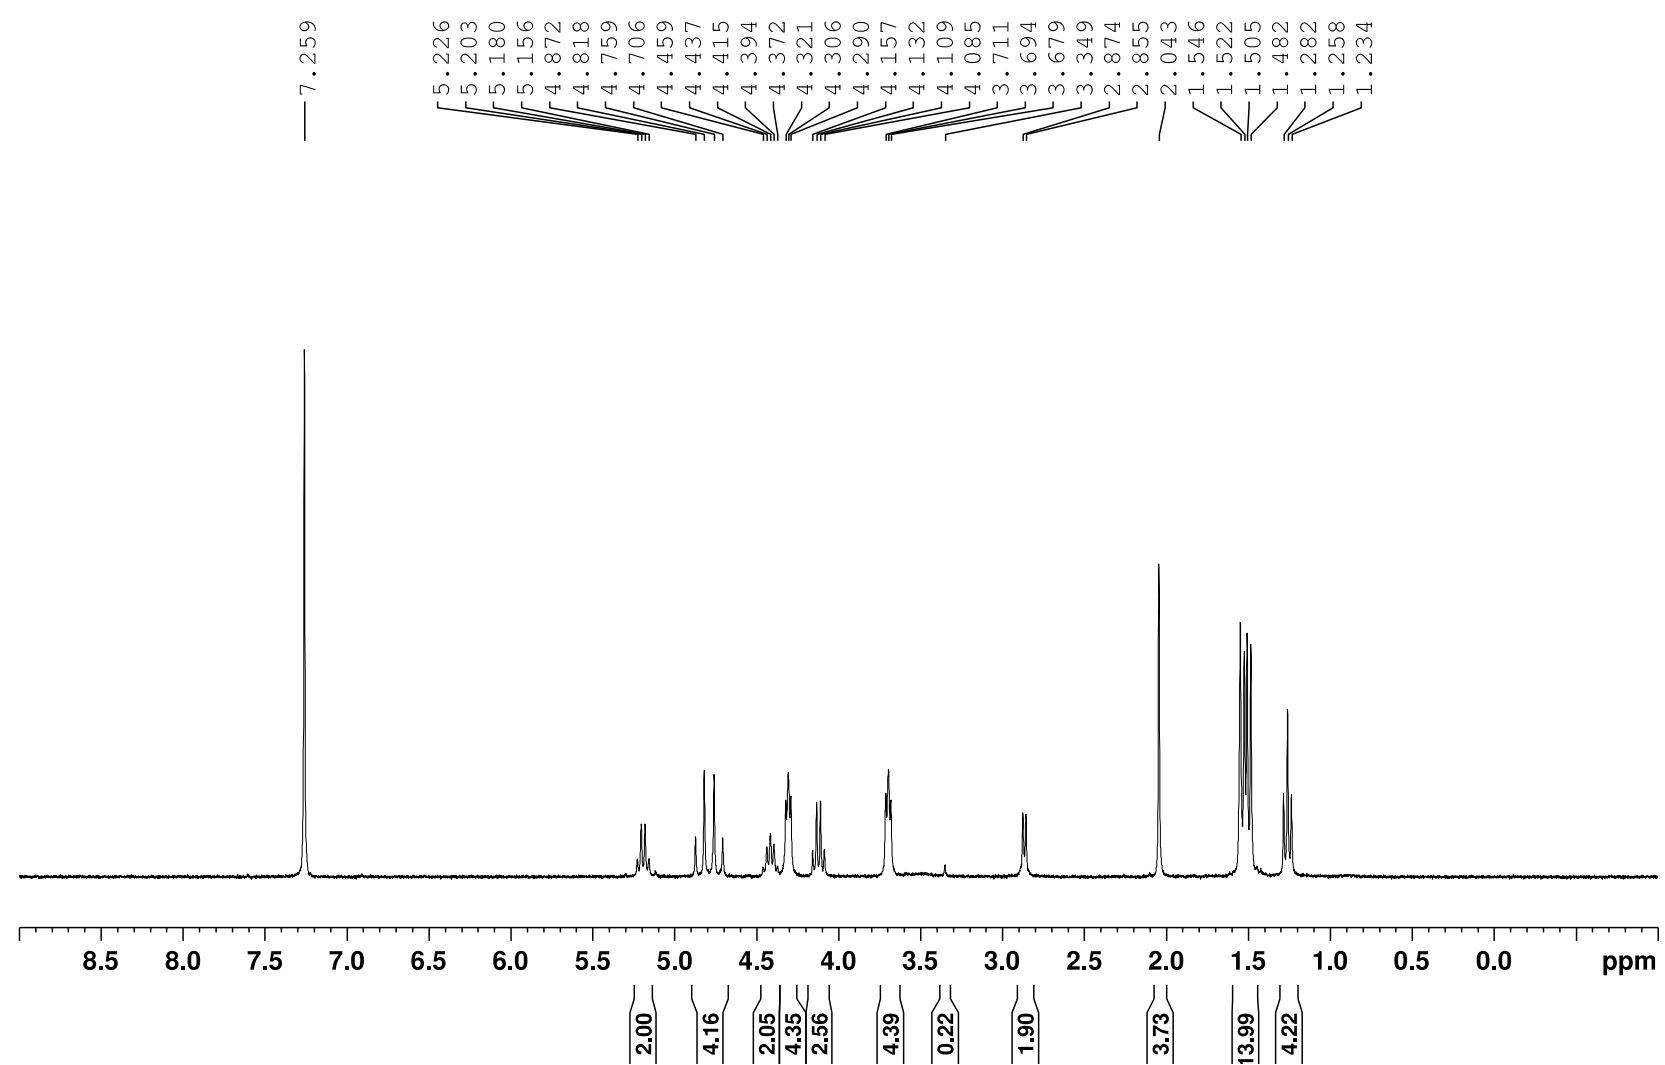

JHS-2071; LGL-EG-LGL; CDCl<sub>3</sub>; 13C; 400a; 1024 Scans; 8/8/16

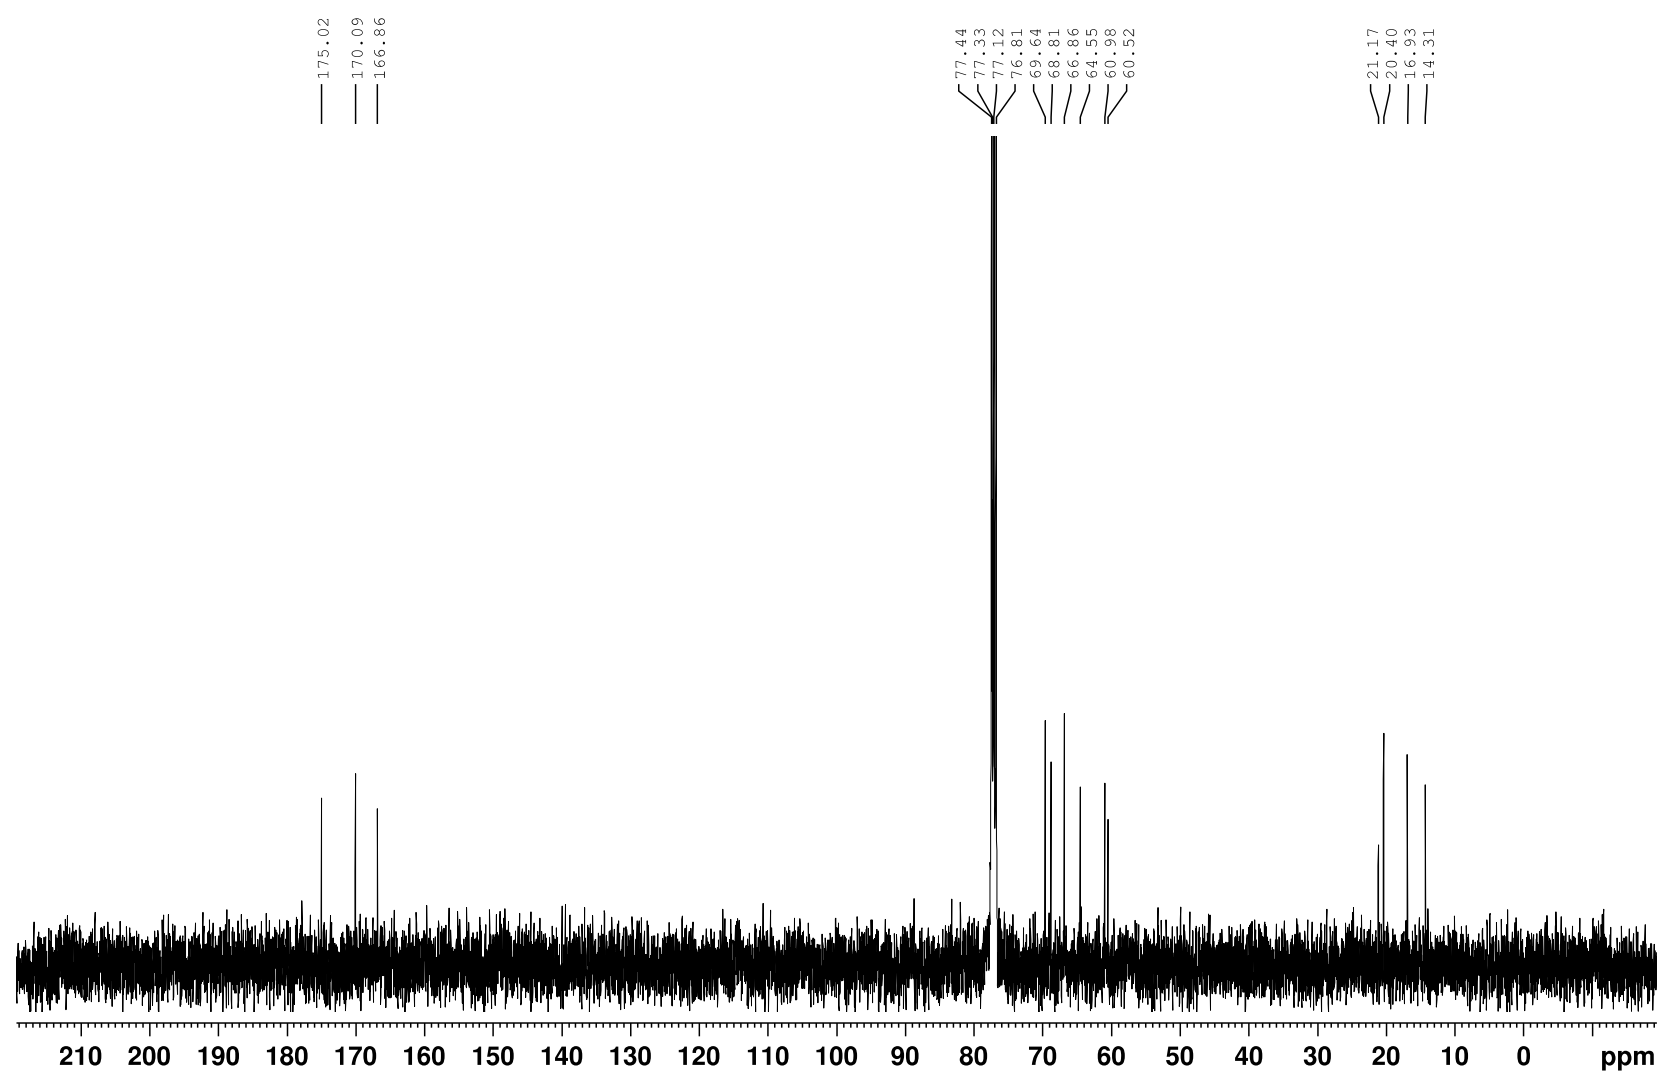



| <b>BLGL-EG-LGLB</b>                                                                |           |      |                                                                | <sup>13</sup> C-NMR (400 MHz, CDCl <sub>3</sub> ) | HRMS (ESI)                                                            |
|------------------------------------------------------------------------------------|-----------|------|----------------------------------------------------------------|---------------------------------------------------|-----------------------------------------------------------------------|
| 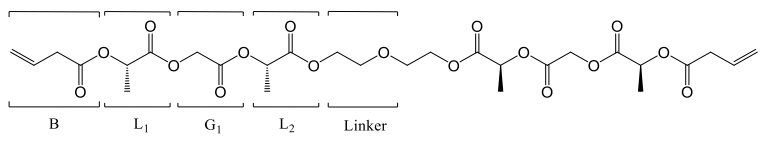 |           |      |                                                                | $\delta$ (ppm) + Assignment                       | <u>Calc. Mass</u><br>646.21 amu                                       |
| <sup>1</sup> H-NMR (400 MHz, CDCl <sub>3</sub> )                                   |           |      |                                                                |                                                   |                                                                       |
| d $\delta$ (ppm)                                                                   | Mult. (J) | Int. | Assignment                                                     |                                                   |                                                                       |
| 1.52                                                                               | d (7.0)   | 6    | L <sub>2</sub> (CH <sub>3</sub> )                              | 14.35 CH <sub>3</sub> (L)                         |                                                                       |
| 1.57                                                                               | d (7.0)   | 6    | L <sub>1</sub> (CH <sub>3</sub> )                              | 16.96 CH <sub>3</sub> (L)                         |                                                                       |
| 3.18                                                                               | m         | 4    | B (CH <sub>2</sub> )                                           | 38.73 CH <sub>2</sub>                             |                                                                       |
| 3.68                                                                               | t (4.8)   | 4    | Linker (CH <sub>2</sub> )                                      | 60.88 CH <sub>2</sub>                             |                                                                       |
| 4.29                                                                               | m         | 4    | Linker (CH <sub>2</sub> )                                      | 64.50 CH <sub>2</sub>                             |                                                                       |
| 4.63                                                                               | d (16)    | 2    | G <sub>1</sub>                                                 | 68.57 CH <sub>2</sub>                             |                                                                       |
| 4.87                                                                               | d (16)    | 2    | G <sub>1</sub>                                                 | 68.89 CH (L)                                      |                                                                       |
| 5.18                                                                               | m         | 8    | L <sub>1</sub> (CH), L <sub>2</sub> (CH), B (CH <sub>2</sub> ) | 69.56 CH (L)                                      |                                                                       |
| 5.93                                                                               | m         | 2    | B (CH)                                                         | 119.13 CH <sub>2</sub> (B)                        |                                                                       |
|                                                                                    |           |      |                                                                | 129.76 CH (B)                                     |                                                                       |
|                                                                                    |           |      |                                                                | 166.77 CO                                         |                                                                       |
|                                                                                    |           |      |                                                                | 170.09 CO                                         |                                                                       |
|                                                                                    |           |      |                                                                | 170.27 CO                                         |                                                                       |
|                                                                                    |           |      |                                                                | 171.01 CO                                         |                                                                       |
|                                                                                    |           |      |                                                                |                                                   | <u>Found</u><br>[M + H] <sup>+</sup><br>647.21 amu                    |
|                                                                                    |           |      |                                                                |                                                   | <u>Composition</u><br>C <sub>28</sub> H <sub>38</sub> O <sub>17</sub> |

**LGL-EG-LGL** (246 mg, 0.52 mmol, 1 eq) was dissolved in dry DCM (10 mL, 0.05 M) in an oven dried 20 mL vial under nitrogen. DPTS (0.07 g, 0.23 mmol, 0.45 eq) and DCC (0.32 g, 1.55 mmol, 3 eq) were added sequentially. Butenoic acid (0.133 g, 1.55 mmol, 3 eq) was then added dropwise through and allowed to stir at RT overnight. Upon consumption of starting material by TLC, the reaction mixture was diluted with hexanes, washed with sodium bicarbonate 3x, dried over MgSO<sub>4</sub> and filtered to remove DCU and drying agent, concentrated, and crude solid was purified via column chromatography (silica, EtOAc/hexanes) to yield a colorless oil (220 mg, 66% yield).

3-Spot2; BLGL-EG-LGLB; CDCl<sub>3</sub>; 1H; 400a; 16 Scans;

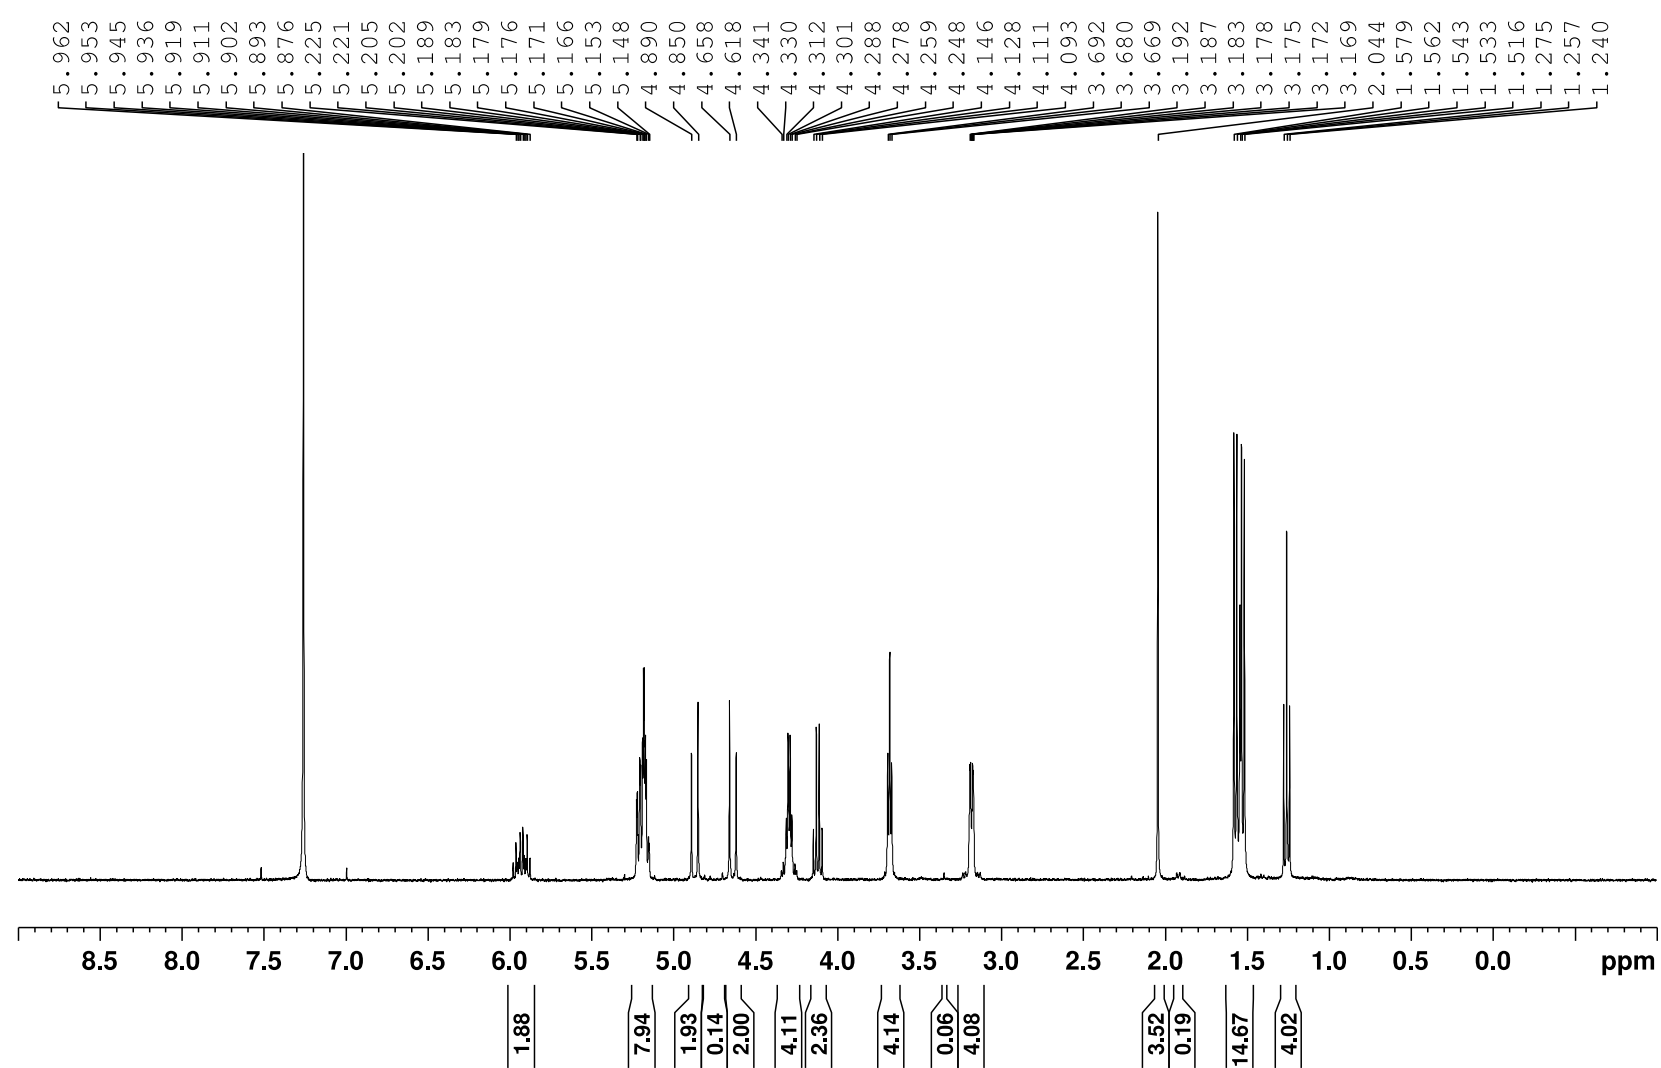

JHS-2073; BLGL-EG-LGLB; CDCl<sub>3</sub>; 13C; 400a; 2048 Scans; 8/10/16

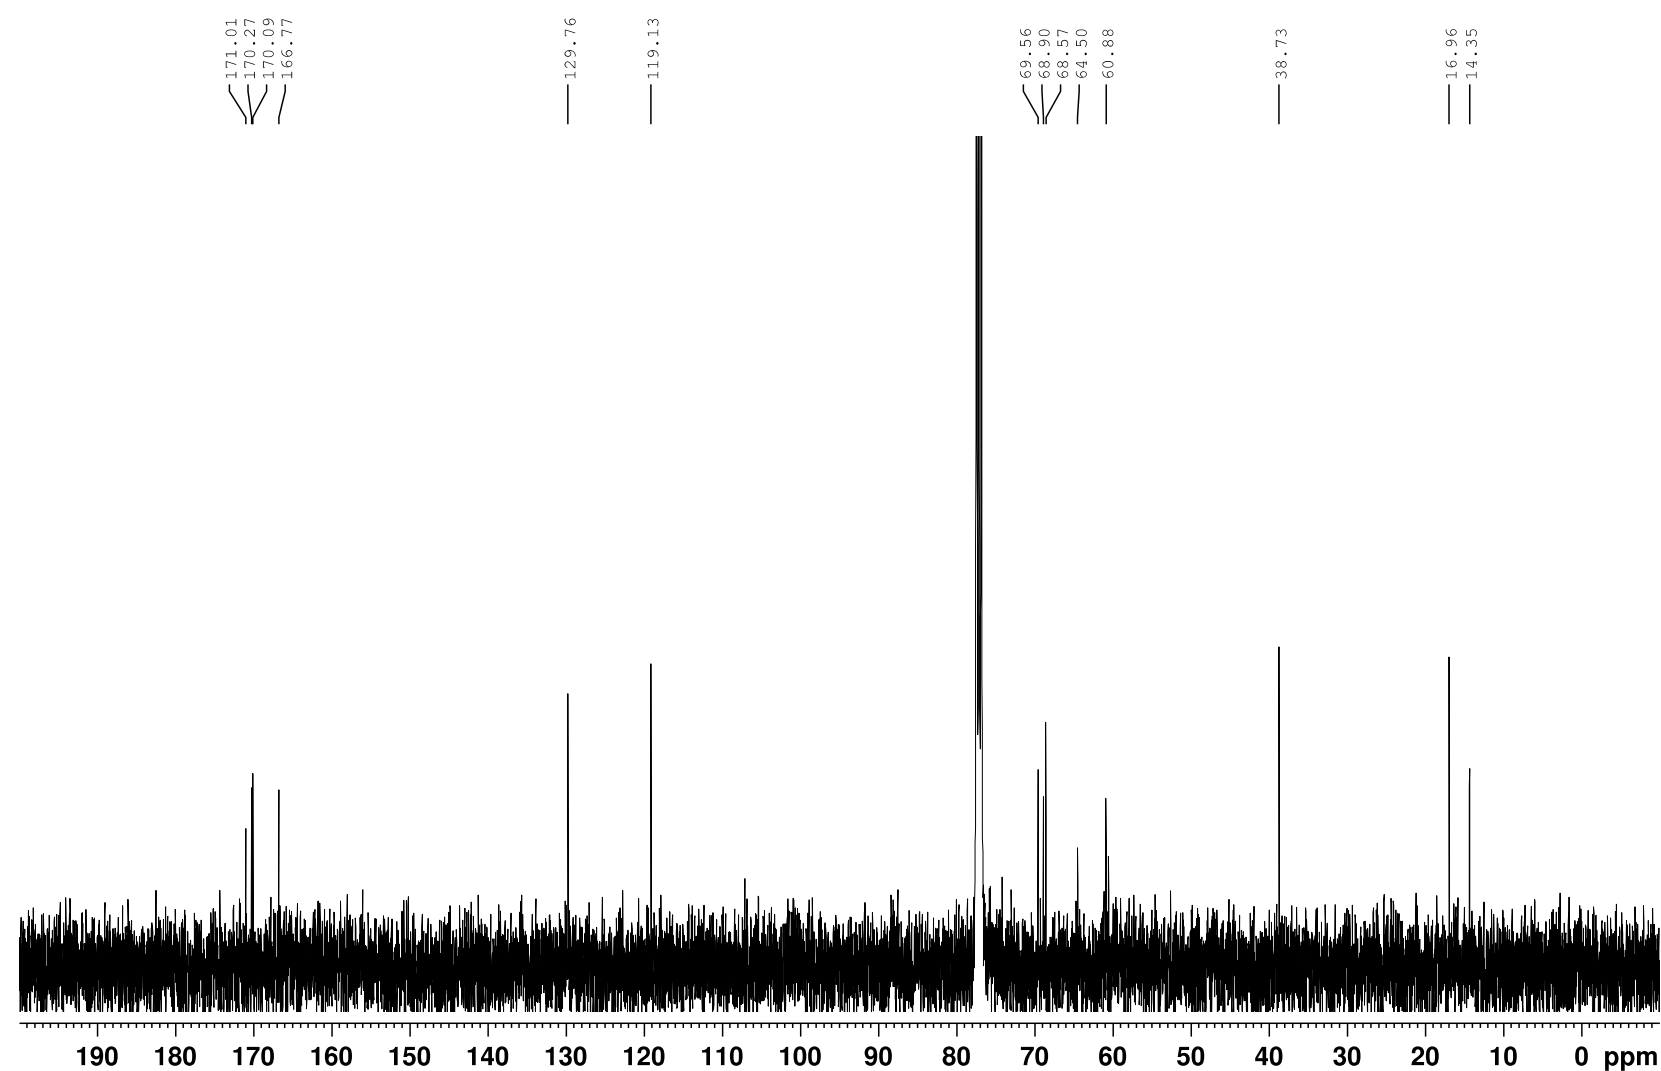

| Cyclic EG Monomer                                                                 |           |      |                                          | <sup>13</sup> C-NMR (400 MHz, CDCl <sub>3</sub> ) |                          | HRMS (ESI)                                      |
|-----------------------------------------------------------------------------------|-----------|------|------------------------------------------|---------------------------------------------------|--------------------------|-------------------------------------------------|
| 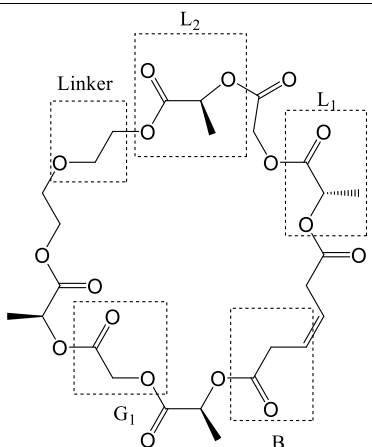 |           |      |                                          | δ (ppm) + Assignment                              |                          | <u>Calc. Mass</u>                               |
|                                                                                   |           |      |                                          | 14.33                                             | CH <sub>3</sub> (L)      | 618.18 amu                                      |
|                                                                                   |           |      |                                          | 16.92                                             | CH <sub>3</sub> (L)      |                                                 |
|                                                                                   |           |      |                                          | 37.59                                             | CH <sub>2</sub> (B)      | <u>Calc.</u>                                    |
|                                                                                   |           |      |                                          | 60.94                                             | CH <sub>2</sub> (Linker) | [M + Na] <sup>+</sup>                           |
|                                                                                   |           |      |                                          | 64.66                                             | CH <sub>2</sub> (Linker) | 641.17 amu                                      |
|                                                                                   |           |      |                                          | 68.61                                             | CH <sub>2</sub> (G)      |                                                 |
|                                                                                   |           |      |                                          | 68.88                                             | CH (L)                   | <u>Found</u>                                    |
|                                                                                   |           |      |                                          | 69.65                                             | CH (L)                   | [M + Na] <sup>+</sup>                           |
|                                                                                   |           |      |                                          | 125.85                                            | CH (B)                   | 641.16984 amu                                   |
| <sup>1</sup> H-NMR (400 MHz, CDCl <sub>3</sub> )                                  |           |      |                                          | 166.68                                            | CO                       |                                                 |
| dδ (ppm)                                                                          | Mult. (J) | Int. | Assignment                               | 170.08                                            | CO                       | <u>Composition</u>                              |
| 1.52                                                                              | d (7.0)   | 6    | L <sub>1</sub> (CH <sub>3</sub> )        | 170.14                                            | CO                       | C <sub>26</sub> H <sub>34</sub> O <sub>17</sub> |
| 1.54                                                                              | d (7.0)   | 6    | L <sub>2</sub> (CH <sub>3</sub> )        | 170.76                                            | CO                       |                                                 |
| 3.17                                                                              | m         | 4    | B (CH <sub>2</sub> )                     |                                                   |                          |                                                 |
| 3.69                                                                              | m         | 4    | Linker (CH <sub>2</sub> )                |                                                   |                          |                                                 |
| 4.30                                                                              | m         | 4    | Linker (CH <sub>2</sub> )                |                                                   |                          |                                                 |
| 4.67                                                                              | d (16)    | 2    | G <sub>1</sub>                           |                                                   |                          |                                                 |
| 4.80                                                                              | d (16)    | 2    | G <sub>1</sub>                           |                                                   |                          |                                                 |
| 5.19                                                                              | m         | 2    | L <sub>1</sub> (CH), L <sub>2</sub> (CH) |                                                   |                          |                                                 |
| 5.79                                                                              | m         | 2    | B (CH)                                   |                                                   |                          |                                                 |

**BLGL-EG-LGLB** (215 mg, 0.33 mmol, 1 eq) was dissolved in dry DCM (330 mL, 0.001M) in a flame-dried Schlenk flask under nitrogen. A stock solution of Grubbs 2 (28 mg, 0.033 mmol, 10 mol%) in dry DCM was added and allowed to stir at RT overnight. Upon consumption of starting material by TLC, reaction mixture was quenched by addition of excess ethyl vinyl ether and stirring for 10 additional min. The reaction mixture was then concentrated and the crude solid was purified via column chromatography (silica, EtOAc/hexanes) to yield a thick brown oil (189 mg, 93% yield).

JHS-2075-Prod; EG Monomer; CDCl<sub>3</sub>; 1H; 400a;  
16 Scans; 8/16/16

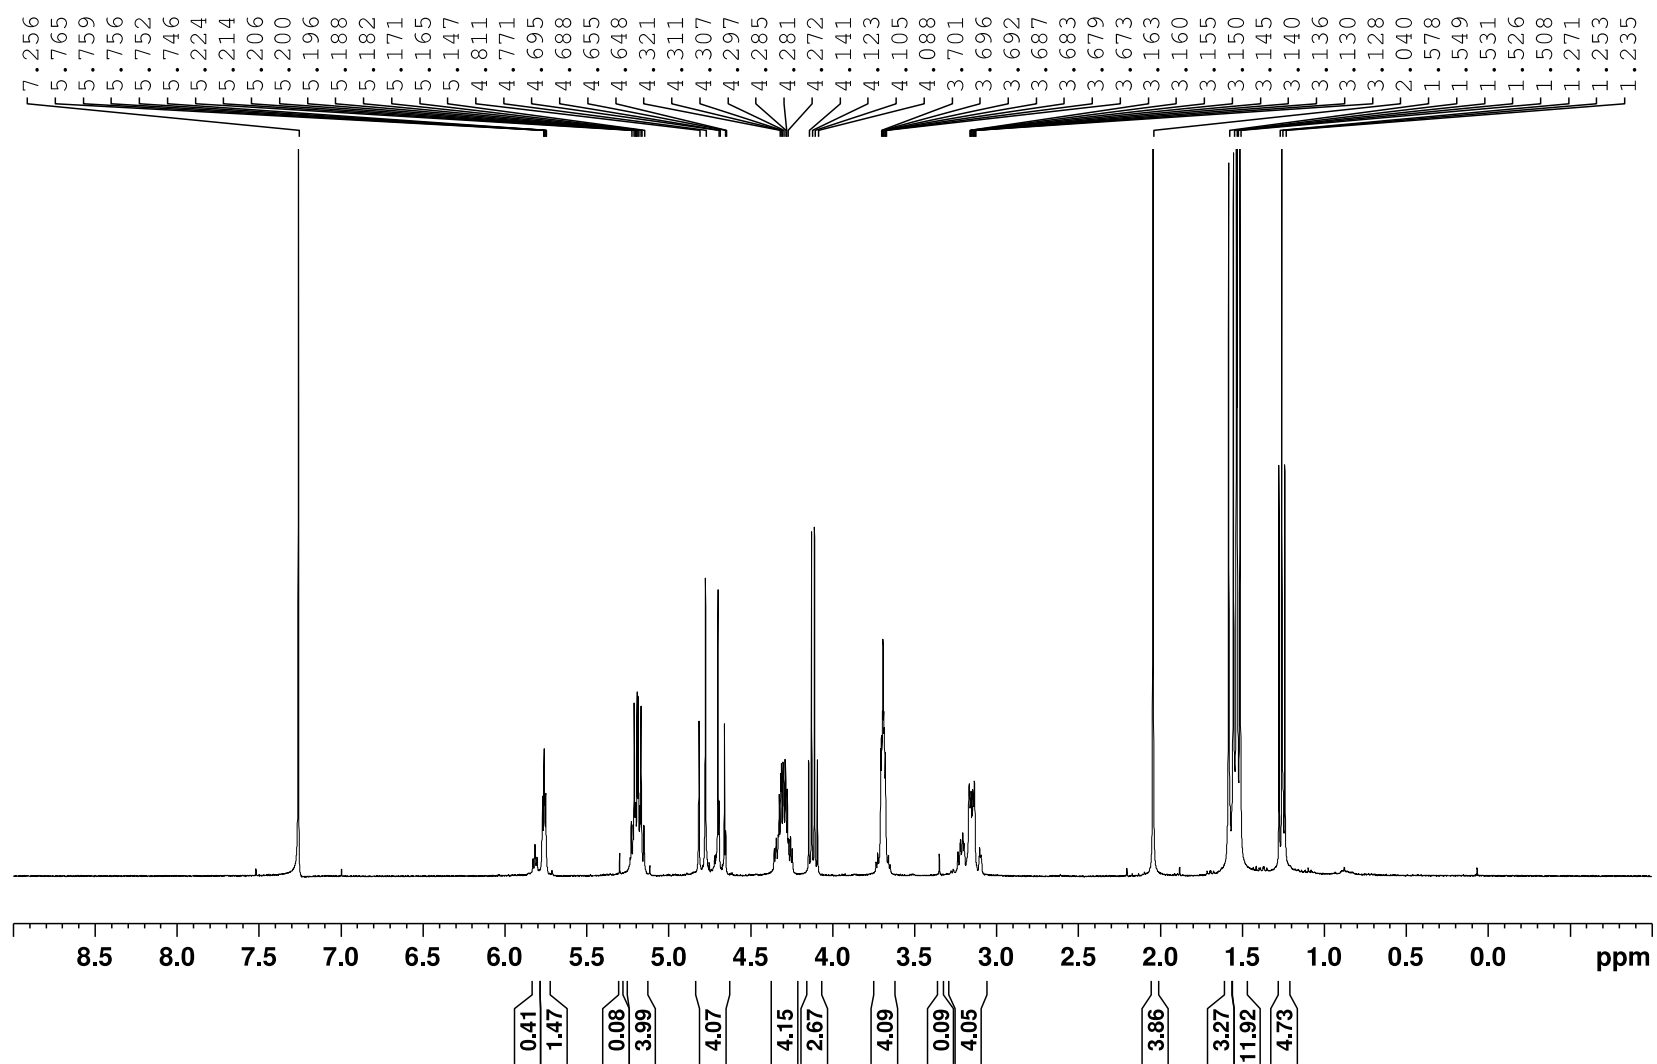

JHS-2075-Prod; EG Monomer; CDCl<sub>3</sub>; 13C; 400a;  
2048 Scans; 8/16/16

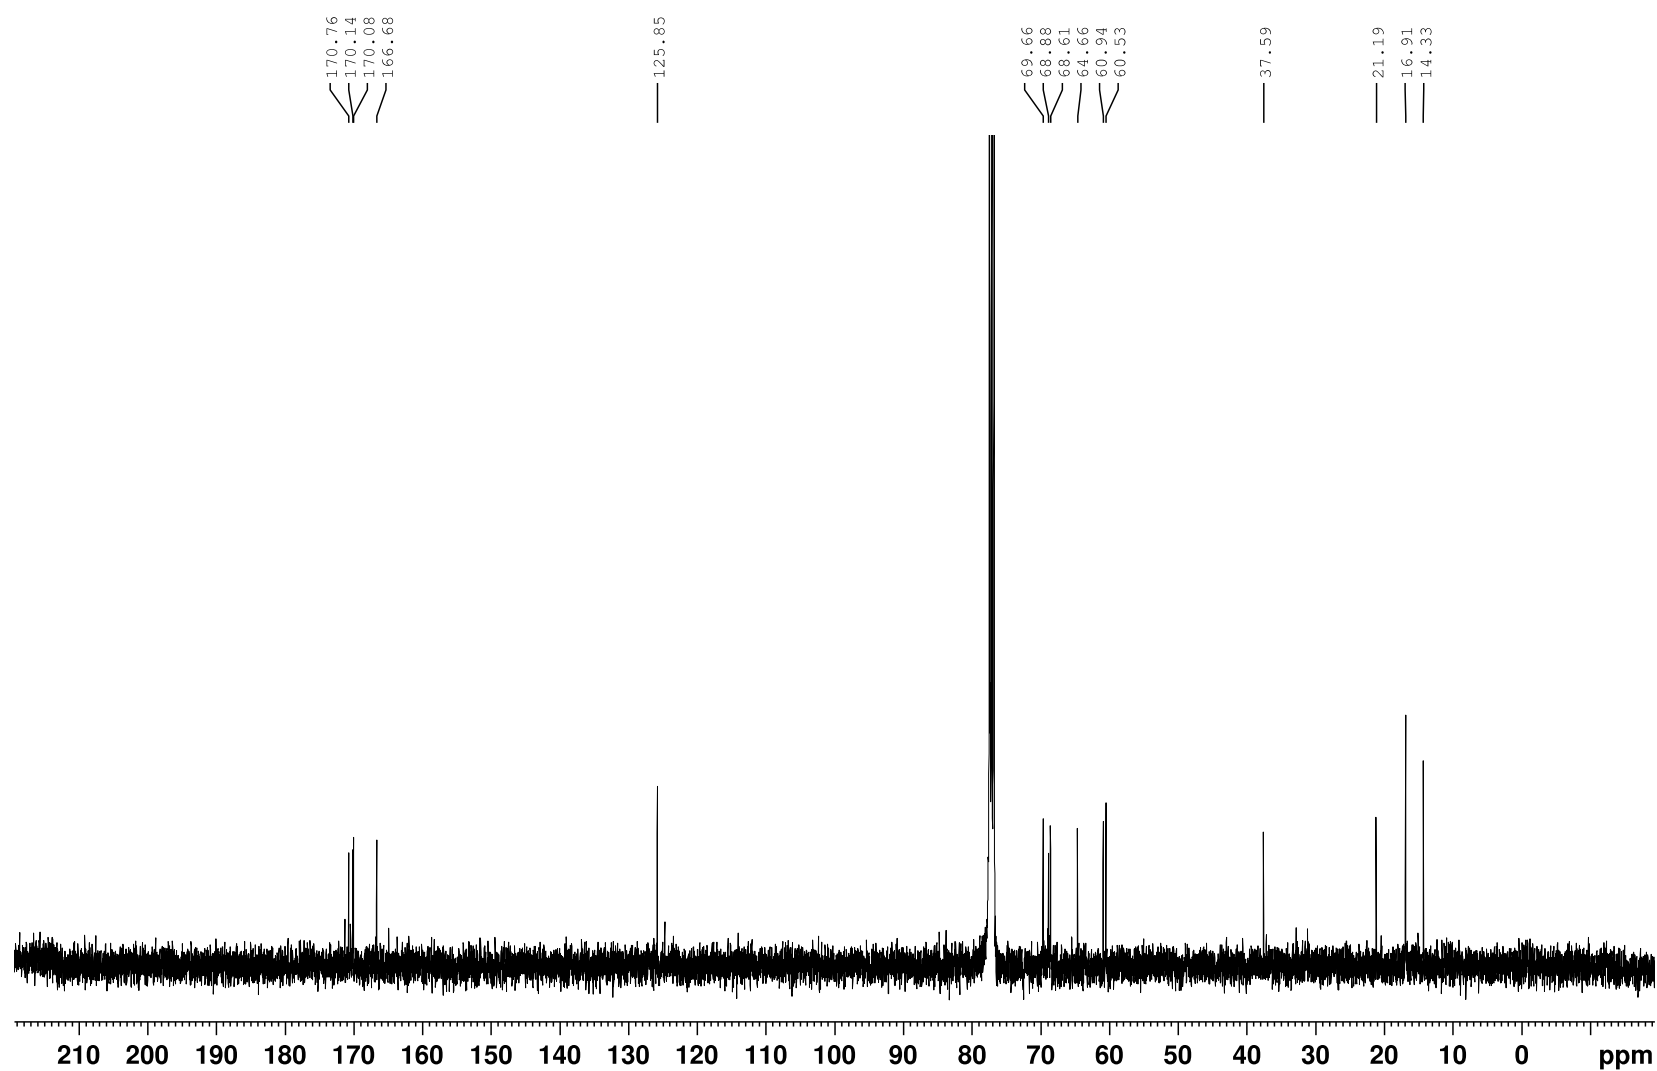

| Poly(EG)                                                                           |           |      |                                          |                                                   |                 |
|------------------------------------------------------------------------------------|-----------|------|------------------------------------------|---------------------------------------------------|-----------------|
| 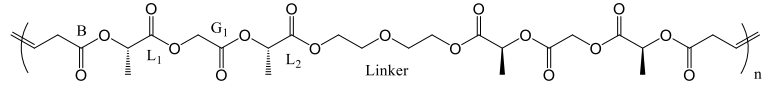 |           |      |                                          | <sup>13</sup> C-NMR (400 MHz, CDCl <sub>3</sub> ) | HRMS (ESI)      |
|                                                                                    |           |      |                                          | $\delta$ (ppm) + Assignment                       | $M_n$           |
|                                                                                    |           |      |                                          | 16.93 CH <sub>3</sub> (L)                         | 32,608          |
|                                                                                    |           |      |                                          | 37.41 CH <sub>2</sub> (Linker)                    | Da              |
|                                                                                    |           |      |                                          | 60.85 CH <sub>2</sub> (G <sub>1</sub> )           | $\underline{D}$ |
|                                                                                    |           |      |                                          | 64.46 CH <sub>2</sub> (B)                         | 1.23            |
|                                                                                    |           |      |                                          | 68.60 CH (L)                                      |                 |
|                                                                                    |           |      |                                          | 68.87 CH (L)                                      |                 |
|                                                                                    |           |      |                                          | 69.53 CH <sub>2</sub> (Linker)                    |                 |
|                                                                                    |           |      |                                          | 124.42 CH <sub>2</sub> (B Cis)                    |                 |
|                                                                                    |           |      |                                          | 125.84 CH (B Trans)                               |                 |
|                                                                                    |           |      |                                          | 166.71 CO                                         |                 |
|                                                                                    |           |      |                                          | 170.02 CO                                         |                 |
|                                                                                    |           |      |                                          | 170.17 CO                                         |                 |
|                                                                                    |           |      |                                          | 170.87 CO                                         |                 |
| <sup>1</sup> H-NMR (400 MHz, CDCl <sub>3</sub> )                                   |           |      |                                          |                                                   |                 |
| $d\delta$ (ppm)                                                                    | Mult. (J) | Int. | Assignment                               |                                                   |                 |
| 1.52                                                                               | d (7.0)   | 6    | L <sub>2</sub> (CH <sub>3</sub> )        |                                                   |                 |
| 1.57                                                                               | d (7.0)   | 6    | L <sub>1</sub> (CH <sub>3</sub> )        |                                                   |                 |
| 3.18                                                                               | m         | 4    | B (CH <sub>2</sub> )                     |                                                   |                 |
| 3.68                                                                               | t (4.7)   | 4    | Linker (CH <sub>2</sub> )                |                                                   |                 |
| 4.29                                                                               | m         | 4    | Linker (CH <sub>2</sub> )                |                                                   |                 |
| 4.63                                                                               | d (16)    | 2    | G <sub>1</sub>                           |                                                   |                 |
| 4.87                                                                               | d (16)    | 2    | G <sub>1</sub>                           |                                                   |                 |
| 5.17                                                                               | m         | 4    | L <sub>1</sub> (CH), L <sub>2</sub> (CH) |                                                   |                 |
| 5.72                                                                               | m         | 1.6  | B (CH) Trans                             |                                                   |                 |
| 5.81                                                                               | m         | 0.4  | B (CH) Cis                               |                                                   |                 |

**Cyclic EG Monomer** (73 mg, 0.118 mmol, 1 eq.) was weighed in a flame dried 1 mL vial under nitrogen. A stock solution of Grubbs II (1 mg, 0.0012 mmol, 1 mol%) in dry DCM (5.8 mg/mL, 0.17 mL, 0.7M) was added to the vial, and the vial was shaken for four hours. The reaction mixture was quenched by the addition of excess ethyl vinyl ether and vortexing. Solution was concentrated to yield a crude solid polymer, which was reprecipitated into a stirring solution of MeOH and filtered to collect pure polymer as a brown solid (41 mg, 56% yield).



JHS-3042-Pure; Poly(EG); CDCl<sub>3</sub>; 1H; 400a;  
16 Scans; 2/23/17

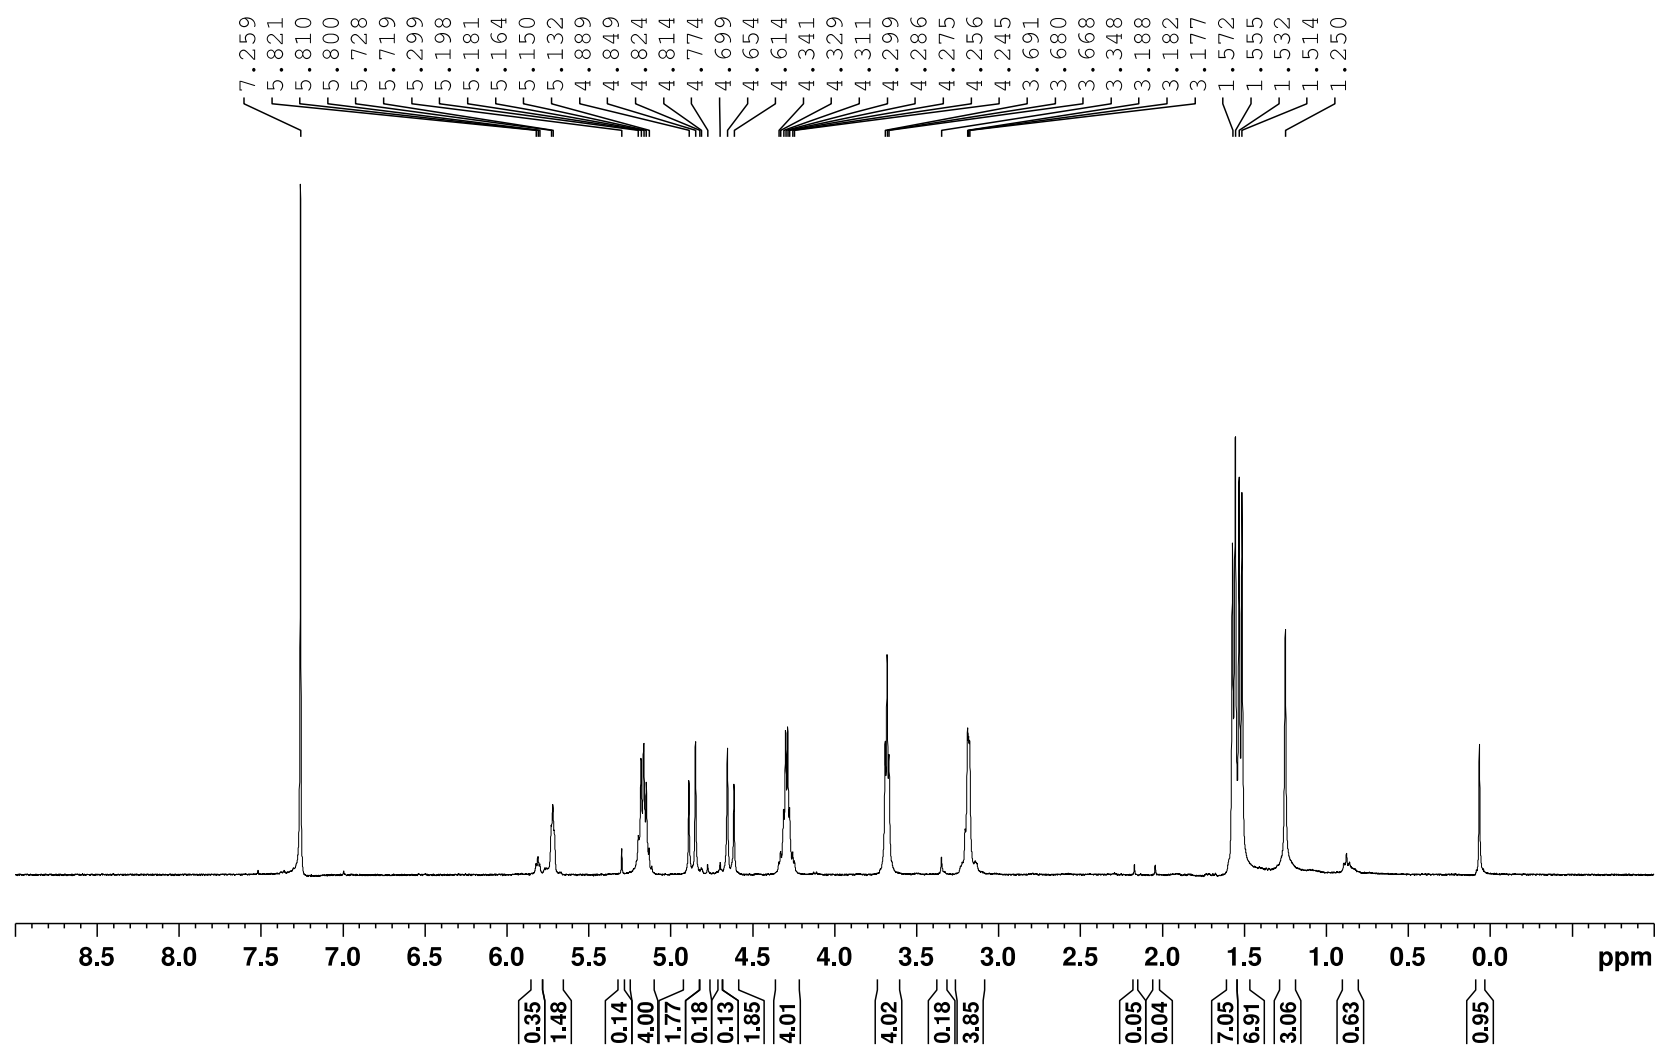

JHS-3042-500; Poly(EG); CDCl<sub>3</sub>; 1H; 500;  
256 Scans; 10/27/17

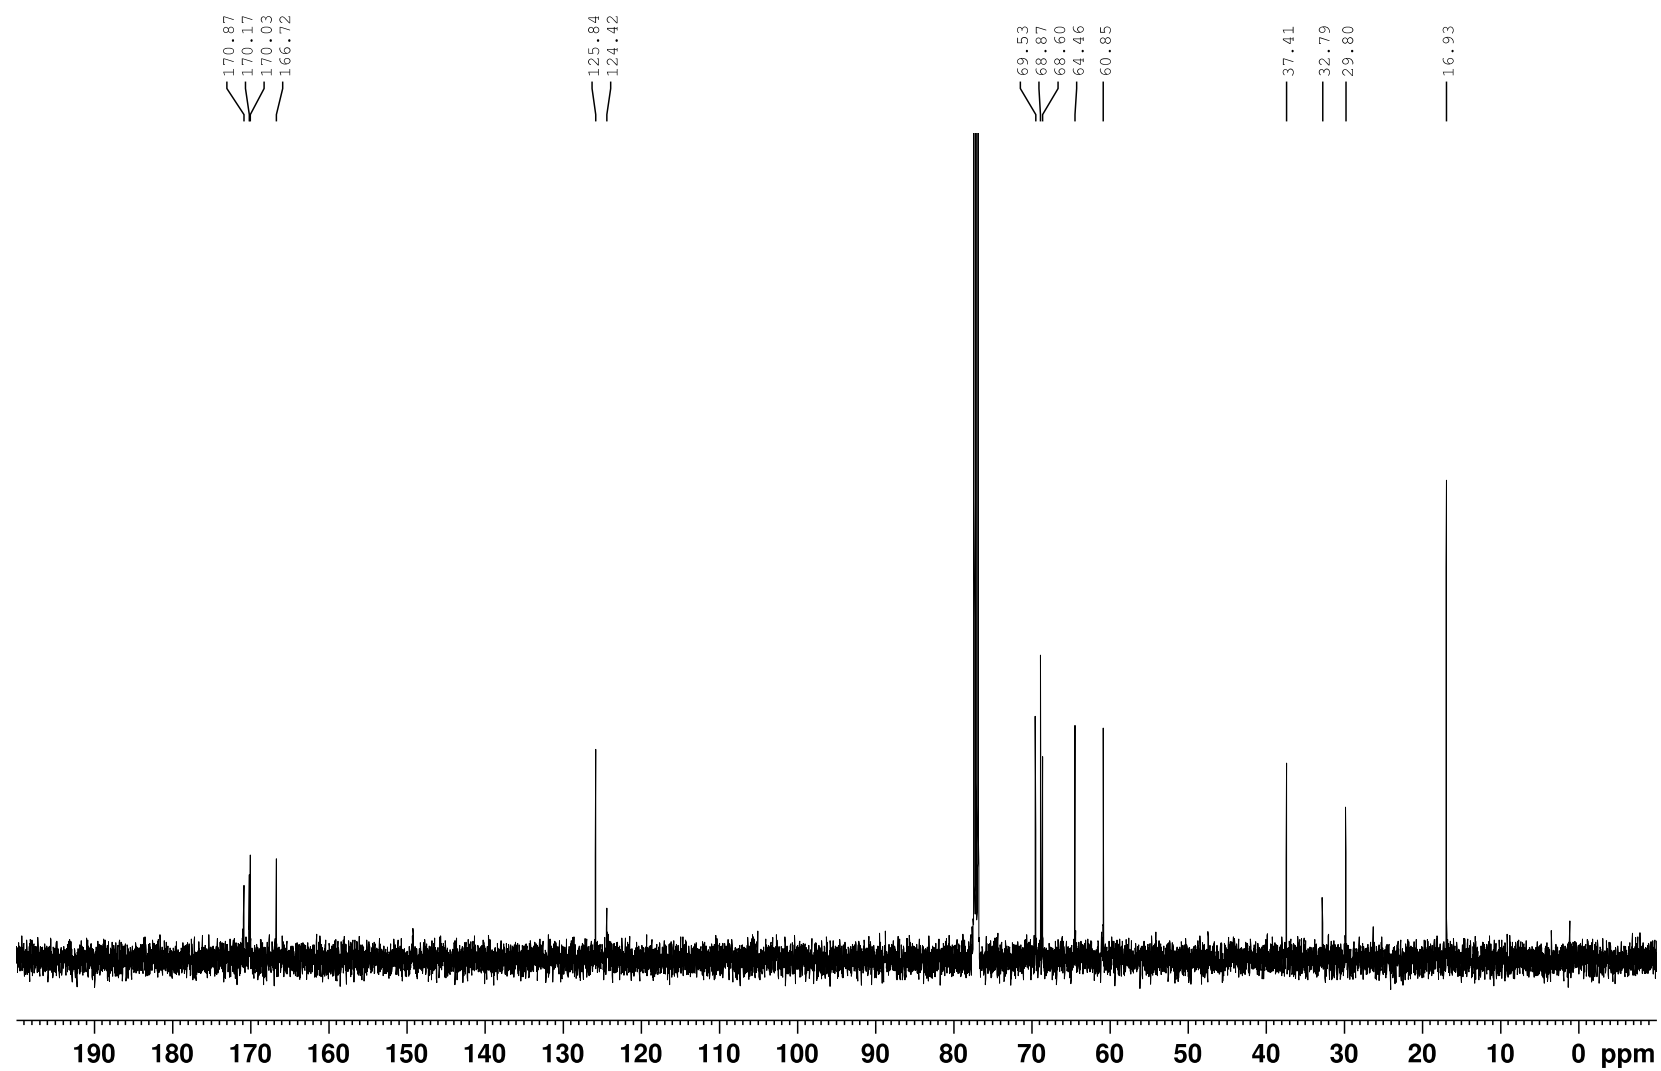

## 2.5 THIO LINKER CONTAINING COMPOUNDS

| Si-LGL-Thio-LGL-Si                                                                 |           |      |                                   | <sup>13</sup> C-NMR (400 MHz, CDCl <sub>3</sub> ) |                                                                                        | HRMS (ESI)                                         |
|------------------------------------------------------------------------------------|-----------|------|-----------------------------------|---------------------------------------------------|----------------------------------------------------------------------------------------|----------------------------------------------------|
| 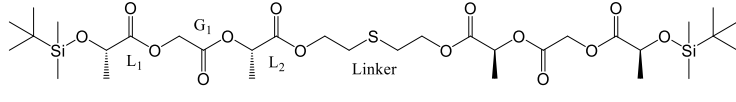 |           |      |                                   | $\delta$ (ppm) + Assignment                       |                                                                                        | <u>Calc. Mass</u><br>754.31 amu                    |
| <sup>1</sup> H-NMR (400 MHz, CDCl <sub>3</sub> )                                   |           |      |                                   | $\delta$ (ppm) + Assignment                       |                                                                                        | <u>Calc.</u><br>[M + H] <sup>+</sup><br>755.31 amu |
| d $\delta$ (ppm)                                                                   | Mult. (J) | Int. | Assignment                        | $\delta$ (ppm) + Assignment                       | <u>Found</u><br>[M + H] <sup>+</sup><br>755.31684 amu                                  |                                                    |
| 0.09                                                                               | s         | 6    | CH <sub>3</sub> (Si)              | -5.41 CH <sub>3</sub> (Si)                        | <u>Composition</u><br>C <sub>32</sub> H <sub>58</sub> O <sub>14</sub> SSi <sub>2</sub> |                                                    |
| 0.11                                                                               | s         | 6    | CH <sub>3</sub> (Si)              | -5.03 CH <sub>3</sub> (Si)                        |                                                                                        |                                                    |
| 0.90                                                                               | s         | 18   | t-Bu (Si)                         | 16.74 CH <sub>3</sub> (L)                         | <u>Found</u><br>[M + H] <sup>+</sup><br>755.31684 amu                                  |                                                    |
| 1.46                                                                               | d (6.8)   | 6    | CH <sub>3</sub> (L <sub>1</sub> ) | 18.16 C (Si)                                      |                                                                                        |                                                    |
| 1.52                                                                               | d (7.1)   | 6    | L <sub>2</sub> (CH <sub>3</sub> ) | 21.25 CH <sub>3</sub> (L)                         | <u>Found</u><br>[M + H] <sup>+</sup><br>755.31684 amu                                  |                                                    |
| 2.80                                                                               | t (6.9)   | 4    | Linker (CH <sub>2</sub> )         | 25.60 t-Bu (Si)                                   |                                                                                        |                                                    |
| 4.30                                                                               | m         | 4    | Linker (CH <sub>2</sub> )         | 30.25 CH <sub>2</sub> (Linker)                    | <u>Found</u><br>[M + H] <sup>+</sup><br>755.31684 amu                                  |                                                    |
| 4.44                                                                               | q (6.8)   | 2    | L <sub>1</sub> (CH)               | 60.36 CH <sub>2</sub> (G <sub>1</sub> )           |                                                                                        |                                                    |
| 4.67                                                                               | d (16)    | 2    | G <sub>1</sub>                    | 64.04 CH (L)                                      | <u>Found</u><br>[M + H] <sup>+</sup><br>755.31684 amu                                  |                                                    |
| 4.79                                                                               | d (16)    | 2    | G <sub>1</sub>                    | 67.93 CH (L)                                      |                                                                                        |                                                    |
| 5.17                                                                               | q (7.1)   | 2    | L <sub>2</sub> (CH)               | 69.21 CH <sub>2</sub> (Linker)                    | <u>Found</u><br>[M + H] <sup>+</sup><br>755.31684 amu                                  |                                                    |
|                                                                                    |           |      |                                   | 166.82 CO                                         |                                                                                        |                                                    |
|                                                                                    |           |      |                                   | 169.70 CO                                         | <u>Found</u><br>[M + H] <sup>+</sup><br>755.31684 amu                                  |                                                    |
|                                                                                    |           |      |                                   | 173.23 CO                                         |                                                                                        |                                                    |

2,2'-Thiodiethanol was dried over sieves for two h. **LGL-Si** (1.27 g, 3.8 mmol, 2.3 eq) was dissolved in dry DCM (12 mL, 0.4 M), and added to a flame-dried vial under nitrogen. Dry 2,2'-thiodiethanol (0.20 g, 1.63 mmol, 1 eq), DPTS (0.224 g, 0.76 mmol, 0.45 eq) and DCC (0.8 g, 3.8 mmol, 2.3 eq) were then added to the vial sequentially and allowed to stir at RT overnight. Upon consumption of starting material by TLC, the reaction mixture was diluted with hexanes and filtered to remove DCU, concentrated and crude oil was purified via column chromatography (silica, EtOAc/hexanes) to yield a colorless oil (0.80 g, 65% yield).

13-33; Si-LGL-Thio-LGL-Si; CDCl<sub>3</sub>; 1H; 400a; 16 Sc

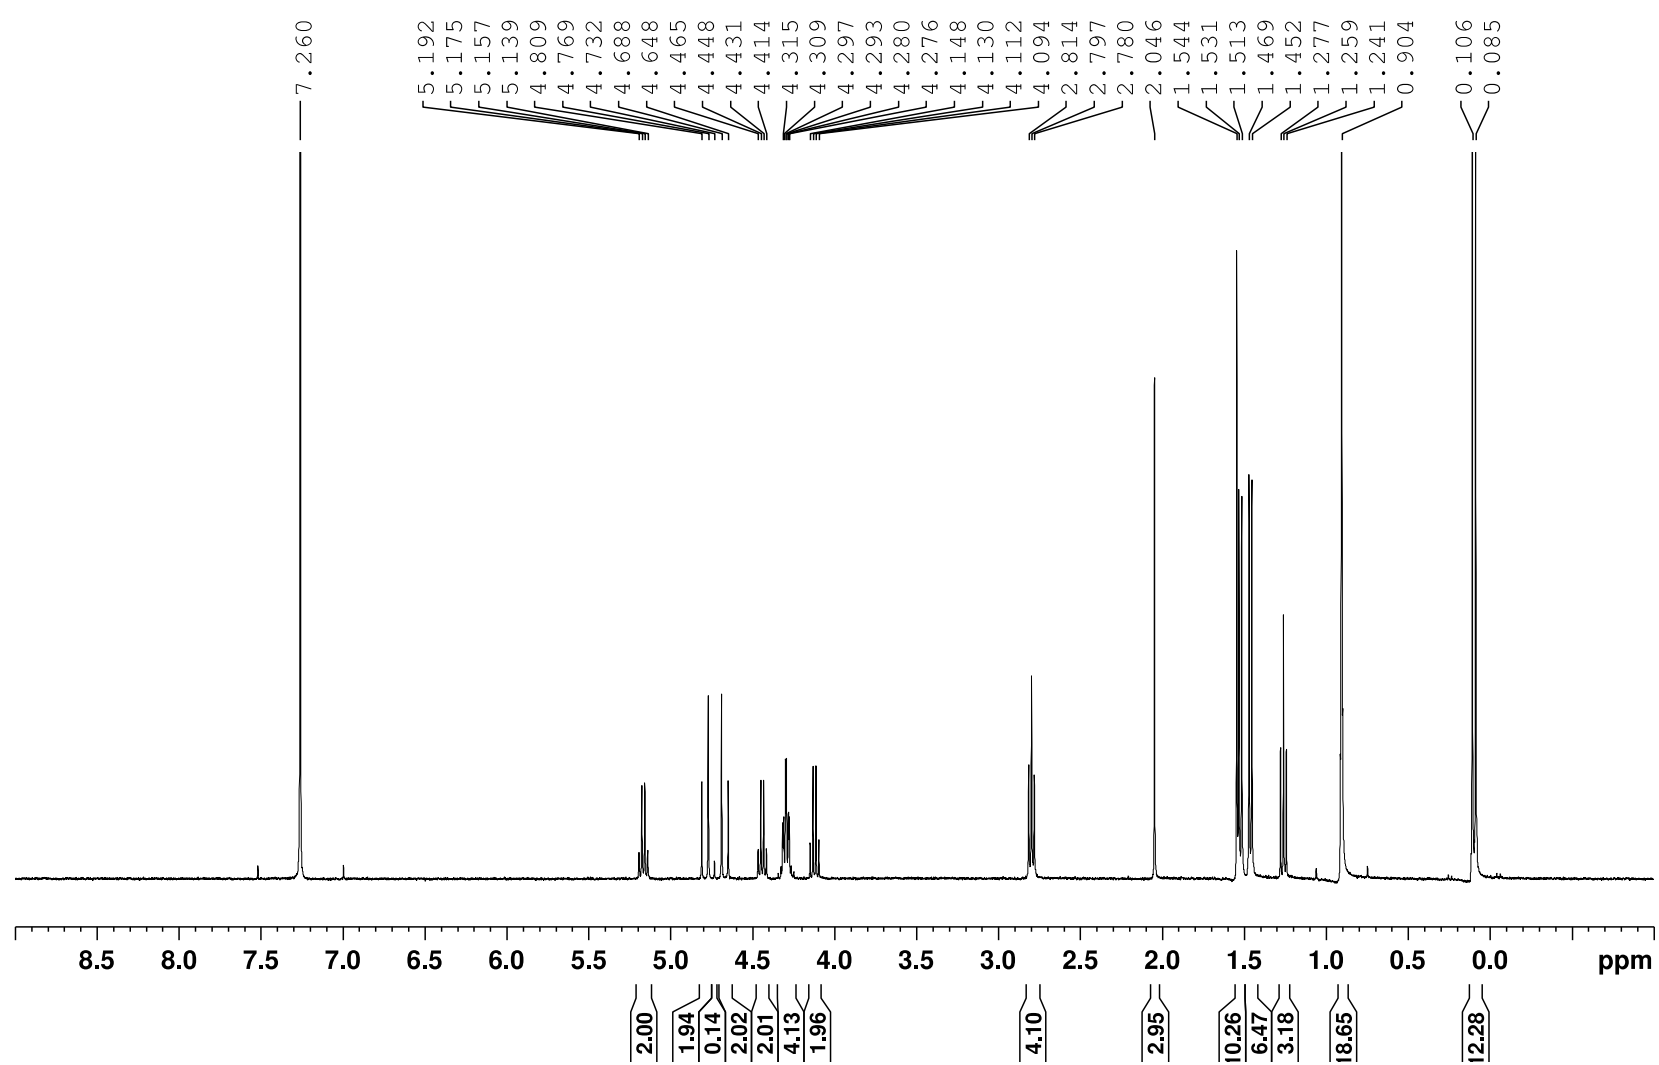

JHS-2051; Si-LGL-Thio-LGL-Si; CDCl<sub>3</sub>; 13C; 400a  
1024 Scans; 10/24/17

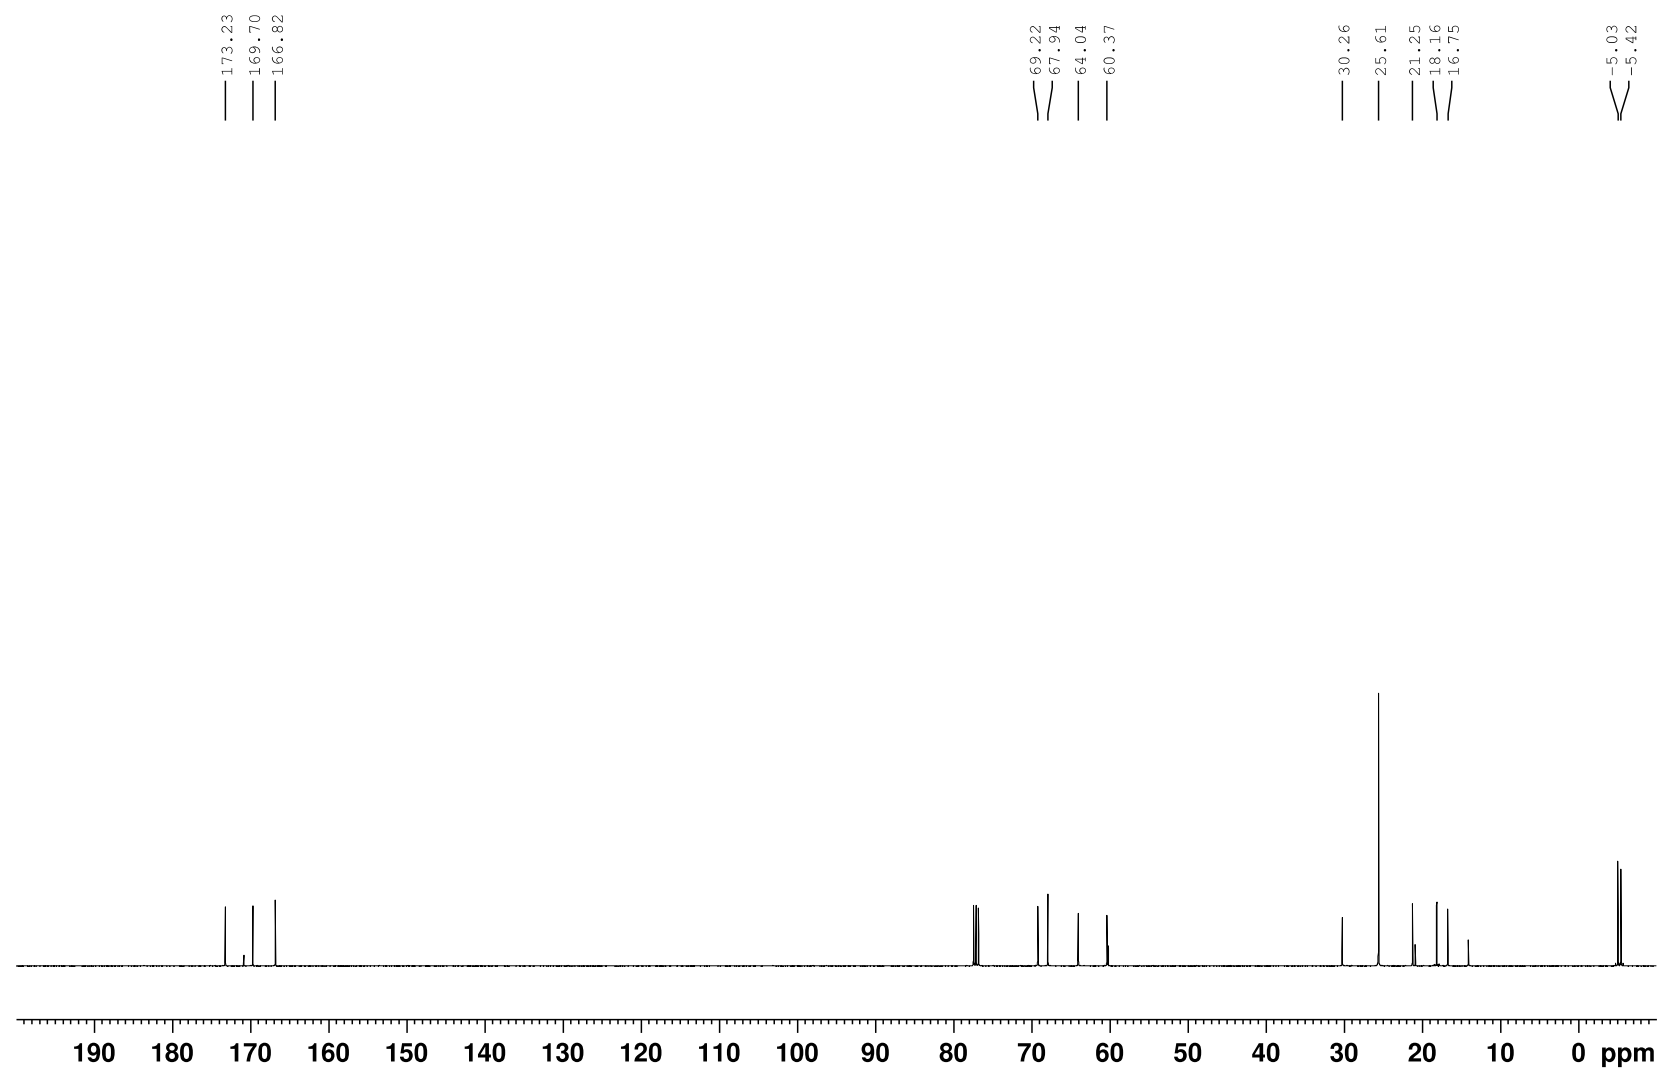

| <b>LGL-Thio-LGL</b>                                                                |                  |             |                                   | <b><sup>13</sup>C-NMR (400 MHz, CDCl<sub>3</sub>)</b> | <b>HRMS (ESI)</b>                                  |
|------------------------------------------------------------------------------------|------------------|-------------|-----------------------------------|-------------------------------------------------------|----------------------------------------------------|
| 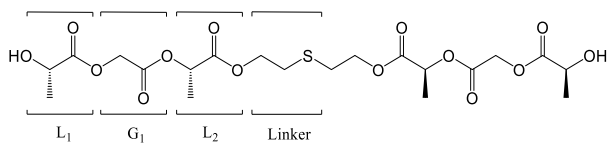 |                  |             |                                   | <b>δ (ppm) + Assignment</b>                           | <b>Calc. Mass</b>                                  |
|                                                                                    |                  |             |                                   | 16.95 CH <sub>3</sub> (L)                             | 526.14 amu                                         |
|                                                                                    |                  |             |                                   | 20.45 CH <sub>3</sub> (L)                             |                                                    |
|                                                                                    |                  |             |                                   | 30.47 CH <sub>2</sub> (Linker)                        | <b>Calc.</b>                                       |
|                                                                                    |                  |             |                                   | 61.01 CH <sub>2</sub> (Linker)                        | [M + H] <sup>+</sup>                               |
|                                                                                    |                  |             |                                   | 64.32 CH <sub>2</sub> (G <sub>1</sub> )               | 527.14 amu                                         |
|                                                                                    |                  |             |                                   | 66.87 CH (L)                                          |                                                    |
|                                                                                    |                  |             |                                   | 69.65 CH (L)                                          | <b>Found</b>                                       |
|                                                                                    |                  |             |                                   | 166.86 CO                                             | [M + H] <sup>+</sup>                               |
|                                                                                    |                  |             |                                   | 169.93 CO                                             | 527.14184 amu                                      |
|                                                                                    |                  |             |                                   | 175.04 CO                                             |                                                    |
| <b><sup>1</sup>H-NMR (400 MHz, CDCl<sub>3</sub>)</b>                               |                  |             |                                   |                                                       | <b>Composition</b>                                 |
| <b>dδ (ppm)</b>                                                                    | <b>Mult. (J)</b> | <b>Int.</b> | <b>Assignment</b>                 |                                                       | <b>C<sub>20</sub>H<sub>30</sub>O<sub>14</sub>S</b> |
| 1.49                                                                               | d (7.0)          | 6           | L <sub>1</sub> (CH <sub>3</sub> ) |                                                       |                                                    |
| 1.54                                                                               | d (7.0)          | 6           | L <sub>2</sub> (CH <sub>3</sub> ) |                                                       |                                                    |
| 2.80                                                                               | t (6.8)          | 4           | Linker (CH <sub>2</sub> )         |                                                       |                                                    |
| 2.86                                                                               | d (5.6)          | 2           | L <sub>1</sub> (OH)               |                                                       |                                                    |
| 4.31                                                                               | t (6.8)          | 4           | Linker (CH <sub>2</sub> )         |                                                       |                                                    |
| 4.42                                                                               | m                | 2           | L <sub>1</sub> (CH)               |                                                       |                                                    |
| 4.74                                                                               | d (16)           | 2           | G <sub>1</sub>                    |                                                       |                                                    |
| 4.84                                                                               | d (16)           | 2           | G <sub>1</sub>                    |                                                       |                                                    |
| 5.17                                                                               | q (7.0)          | 2           | L <sub>2</sub> (CH)               |                                                       |                                                    |

AcOH (0.61 mL, 10.6 mmol, 16 eq) and TBAF (1 M in THF) (2.0 mL, 2.0 mmol, 3 eq) were dried over activated sieves for 2 h. **Si-LGL-Thio-LGL-Si** (500 mg, 0.663 mmol, 1 eq) was dissolved in dry THF (17 mL, 0.04 M) in a flame dried Schlenk flask under nitrogen. AcOH and TBAF were added dropwise at 0°C, allowed to warm to RT and stir for 30 h. The reaction mixture was then diluted with brine and extracted with EtOAc 3x, combined organic layers were washed with brine 3x, dried over MgSO<sub>4</sub>, concentrated and the crude oil was then purified via column chromatography (silica, EtOAc/hexanes) to yield a colorless oil (221 mg, 63% yield).

2063; LGL-THio-LGL; CDCl<sub>3</sub>; 1H; 400a; 16 scans; 8/

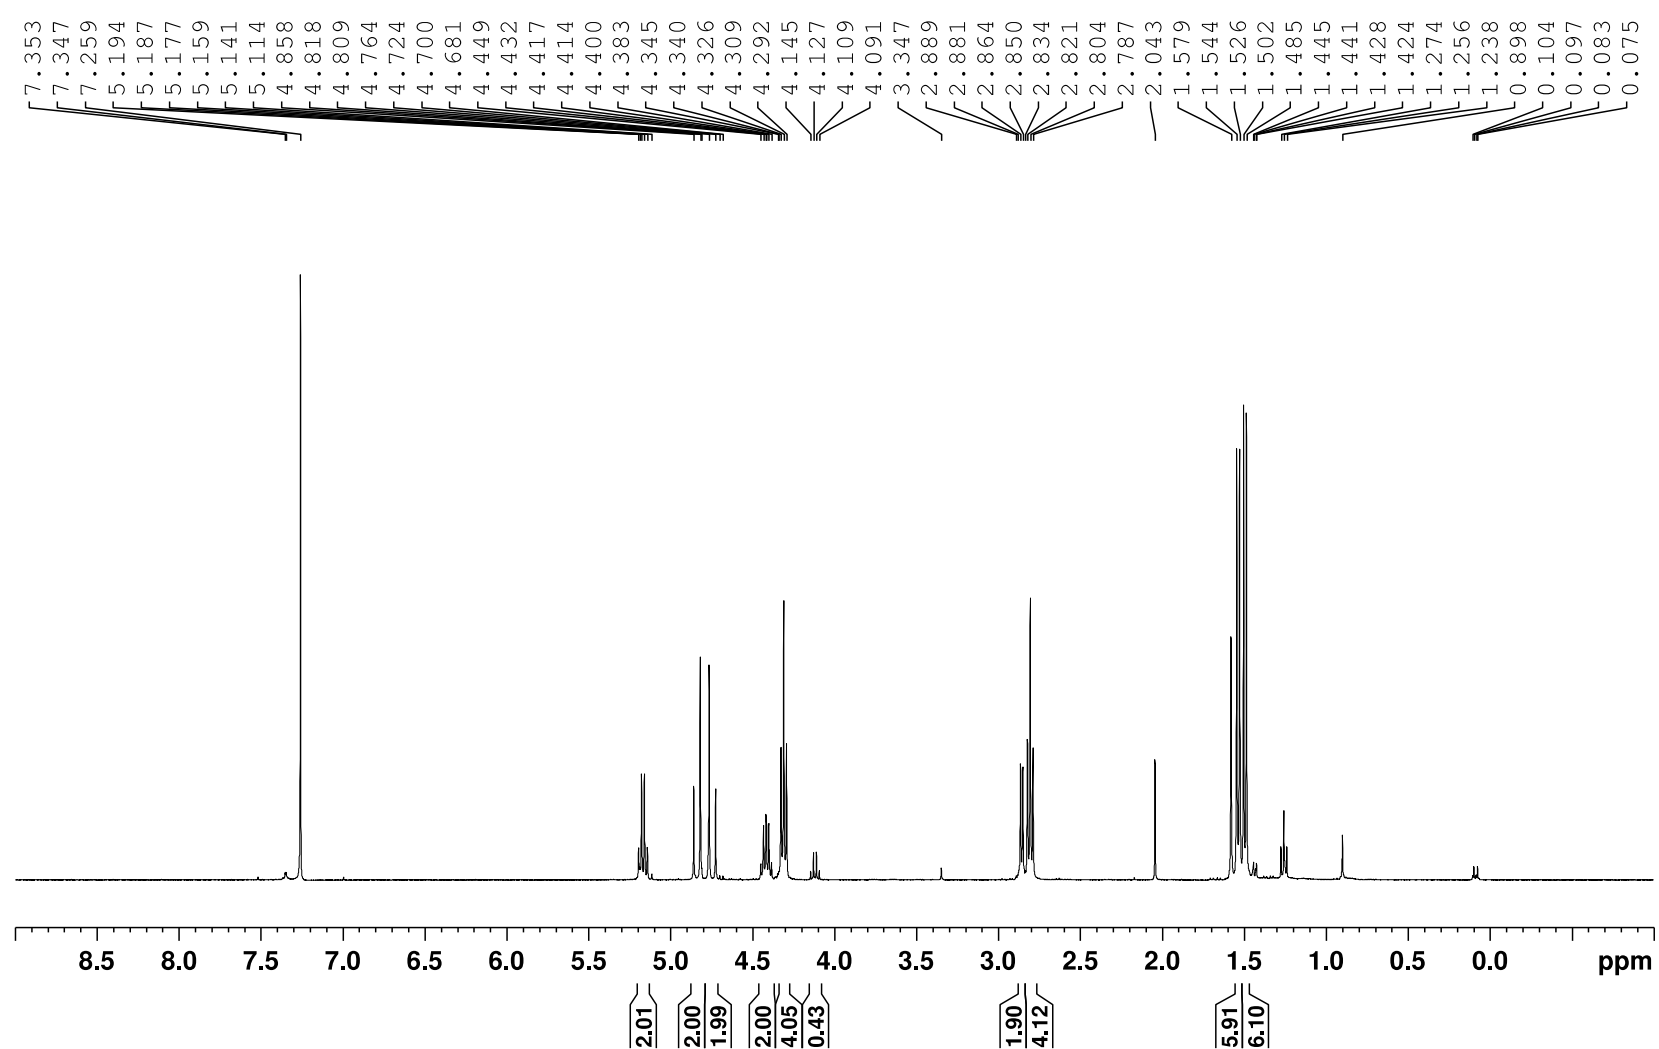

JHS-2063; LGL-THio-LGL; CDCl<sub>3</sub>; 13C; 400a; 1024 scans; 8/1/16

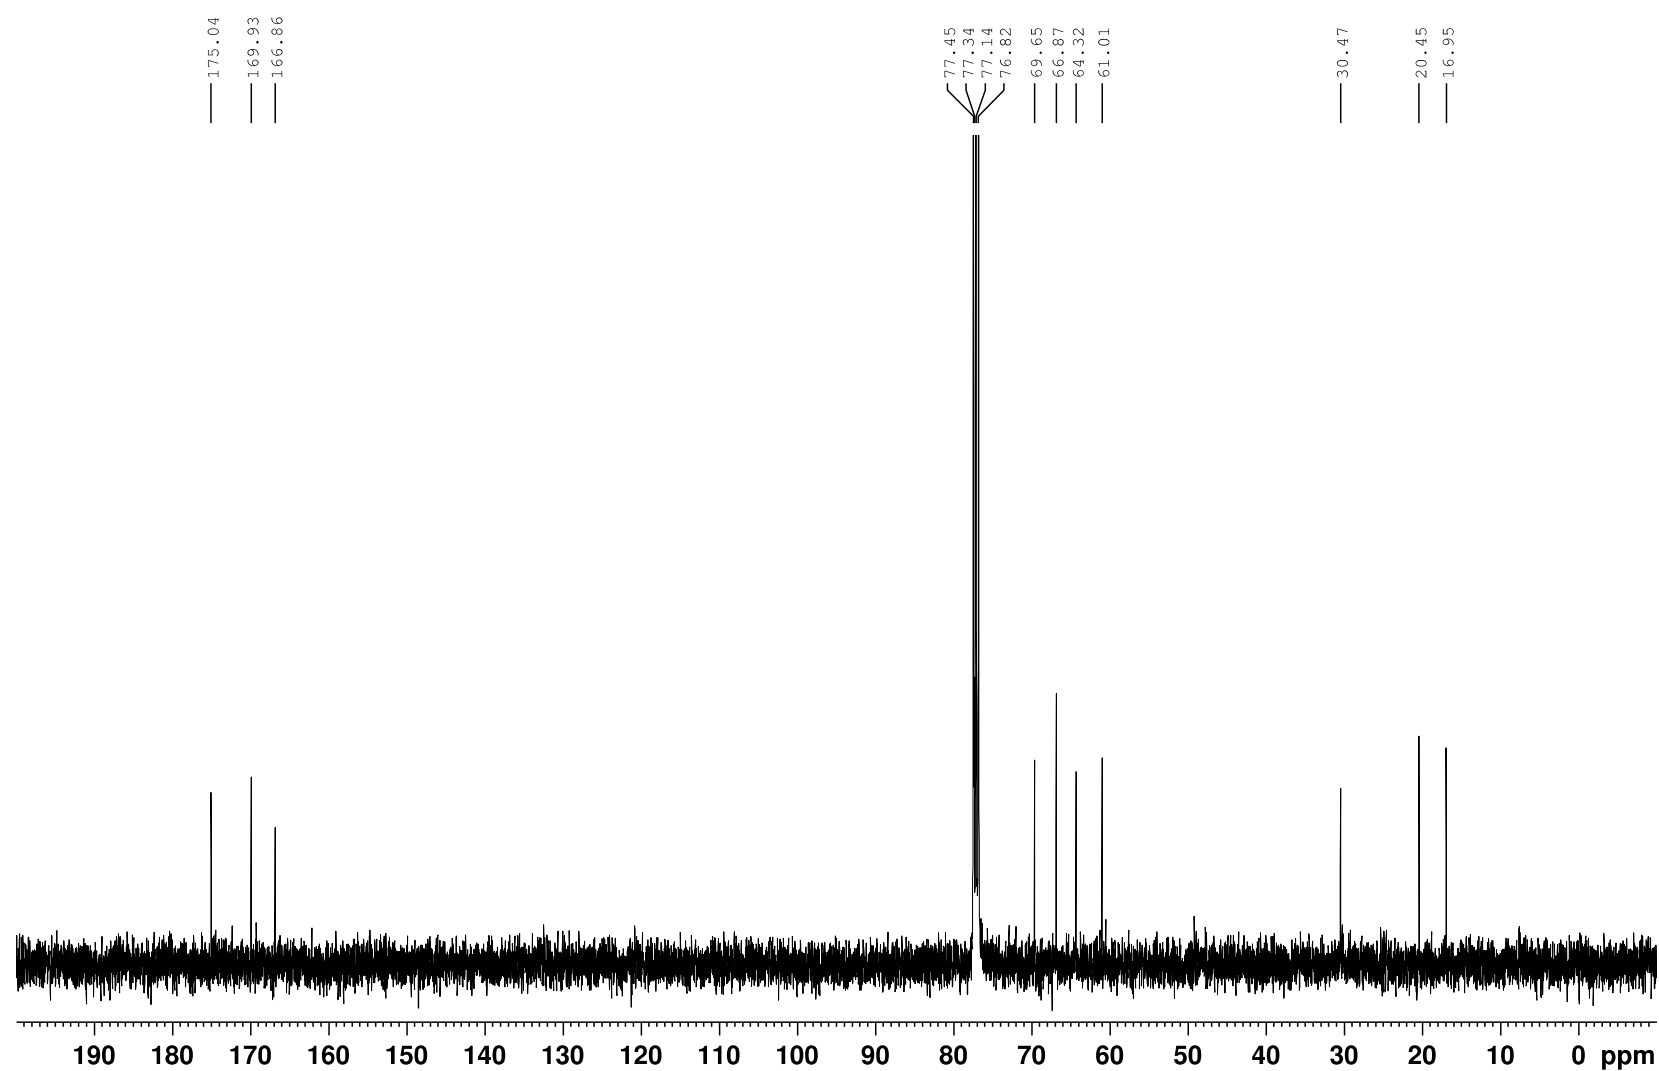

| <b>BLGL-Thio-LGLB</b>                                                              |                  |             |                                                               |
|------------------------------------------------------------------------------------|------------------|-------------|---------------------------------------------------------------|
| 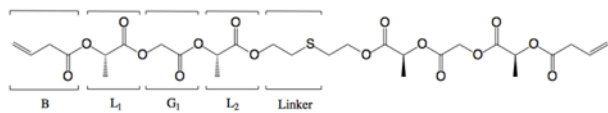 |                  |             |                                                               |
|                                                                                    |                  |             | <b><sup>13</sup>C-NMR (500 MHz, CDCl<sub>3</sub>)</b>         |
|                                                                                    |                  |             | <b>HRMS (ESI)</b>                                             |
|                                                                                    |                  |             | <u>Calc. Mass</u>                                             |
|                                                                                    |                  |             | 662.19 g/mol                                                  |
|                                                                                    |                  |             | <u>Calc.</u>                                                  |
|                                                                                    |                  |             | [M + H] <sup>+</sup>                                          |
|                                                                                    |                  |             | 663.19 amu                                                    |
|                                                                                    |                  |             | <u>Found</u>                                                  |
|                                                                                    |                  |             | [M + H] <sup>+</sup>                                          |
|                                                                                    |                  |             | 663.19379                                                     |
|                                                                                    |                  |             | amu                                                           |
|                                                                                    |                  |             | <u>Composition</u>                                            |
|                                                                                    |                  |             | C <sub>28</sub> H <sub>38</sub> O <sub>16</sub> S             |
| <b><sup>1</sup>H-NMR (400 MHz, CDCl<sub>3</sub>)</b>                               |                  |             |                                                               |
| <b>δ (ppm)</b>                                                                     | <b>Mult. (J)</b> | <b>Int.</b> | <b>Assignment</b>                                             |
| 1.52                                                                               | d (6.8)          | 6           | <b>L<sub>1</sub> CH<sub>3</sub></b>                           |
| 1.57                                                                               | d (6.8)          | 6           | <b>L<sub>2</sub> CH<sub>3</sub></b>                           |
| 2.79                                                                               | t (13.6)         | 4           | <b>Linker CH<sub>2</sub> α to S</b>                           |
| 3.10-3.25                                                                          | m                | 4           | <b>B Terminal CH<sub>2</sub></b>                              |
| 4.30                                                                               | t (13.6)         | 4           | <b>Linker CH<sub>2</sub> β to S</b>                           |
| 4.64                                                                               | d (16)           | 2           | <b>G<sub>1</sub></b>                                          |
| 4.87                                                                               | d (16)           | 2           | <b>G<sub>1</sub></b>                                          |
| 5.13-5.30                                                                          | m                | 8           | <b>L<sub>1</sub> &amp; L<sub>2</sub> Methyne, B Methylene</b> |
| 5.88-5.98                                                                          | m                | 2           | <b>B CH</b>                                                   |
|                                                                                    |                  |             | 16.95 CH                                                      |
|                                                                                    |                  |             | 30.52 CH                                                      |
|                                                                                    |                  |             | 34.08 CH                                                      |
|                                                                                    |                  |             | 38.71 CH                                                      |
|                                                                                    |                  |             | 60.87 CH                                                      |
|                                                                                    |                  |             | 64.22 CH                                                      |
|                                                                                    |                  |             | 68.56 CH                                                      |
|                                                                                    |                  |             | 69.53 CH                                                      |
|                                                                                    |                  |             | 119.12 Olefin                                                 |
|                                                                                    |                  |             | 129.73 Olefin                                                 |
|                                                                                    |                  |             | 166.76 CO                                                     |
|                                                                                    |                  |             | 169.92 CO                                                     |
|                                                                                    |                  |             | 170.26 CO                                                     |
|                                                                                    |                  |             | 171.00 CO                                                     |

**LGL-Thio-LGL** (221 mg, 0.42 mmol, 1 eq) was dissolved in dry DCM (8 mL, 0.05 M) in an oven dried vial under nitrogen. DPTS (56 mg, 0.19 mmol, 0.45 eq) and DCC (0.26 g, 1.3 mmol, 3 eq) were added sequentially. Butenoic acid (0.11 g, 1.3 mmol, 3 eq) was then added dropwise and allowed to stir at RT overnight. Upon consumption of starting material by TLC, the reaction mixture was diluted with hexanes, washed with sodium bicarbonate 3x, dried over MgSO<sub>4</sub> and filtered to remove DCU and drying agent, concentrated, and crude oil was purified via column chromatography (silica, EtOAc/hexanes) to yield a colorless oil (203 mg, 73% yield).

066; BLGL-Thio-LGLB; CDCl<sub>3</sub>; 1H; 400a; 16 scans; 8

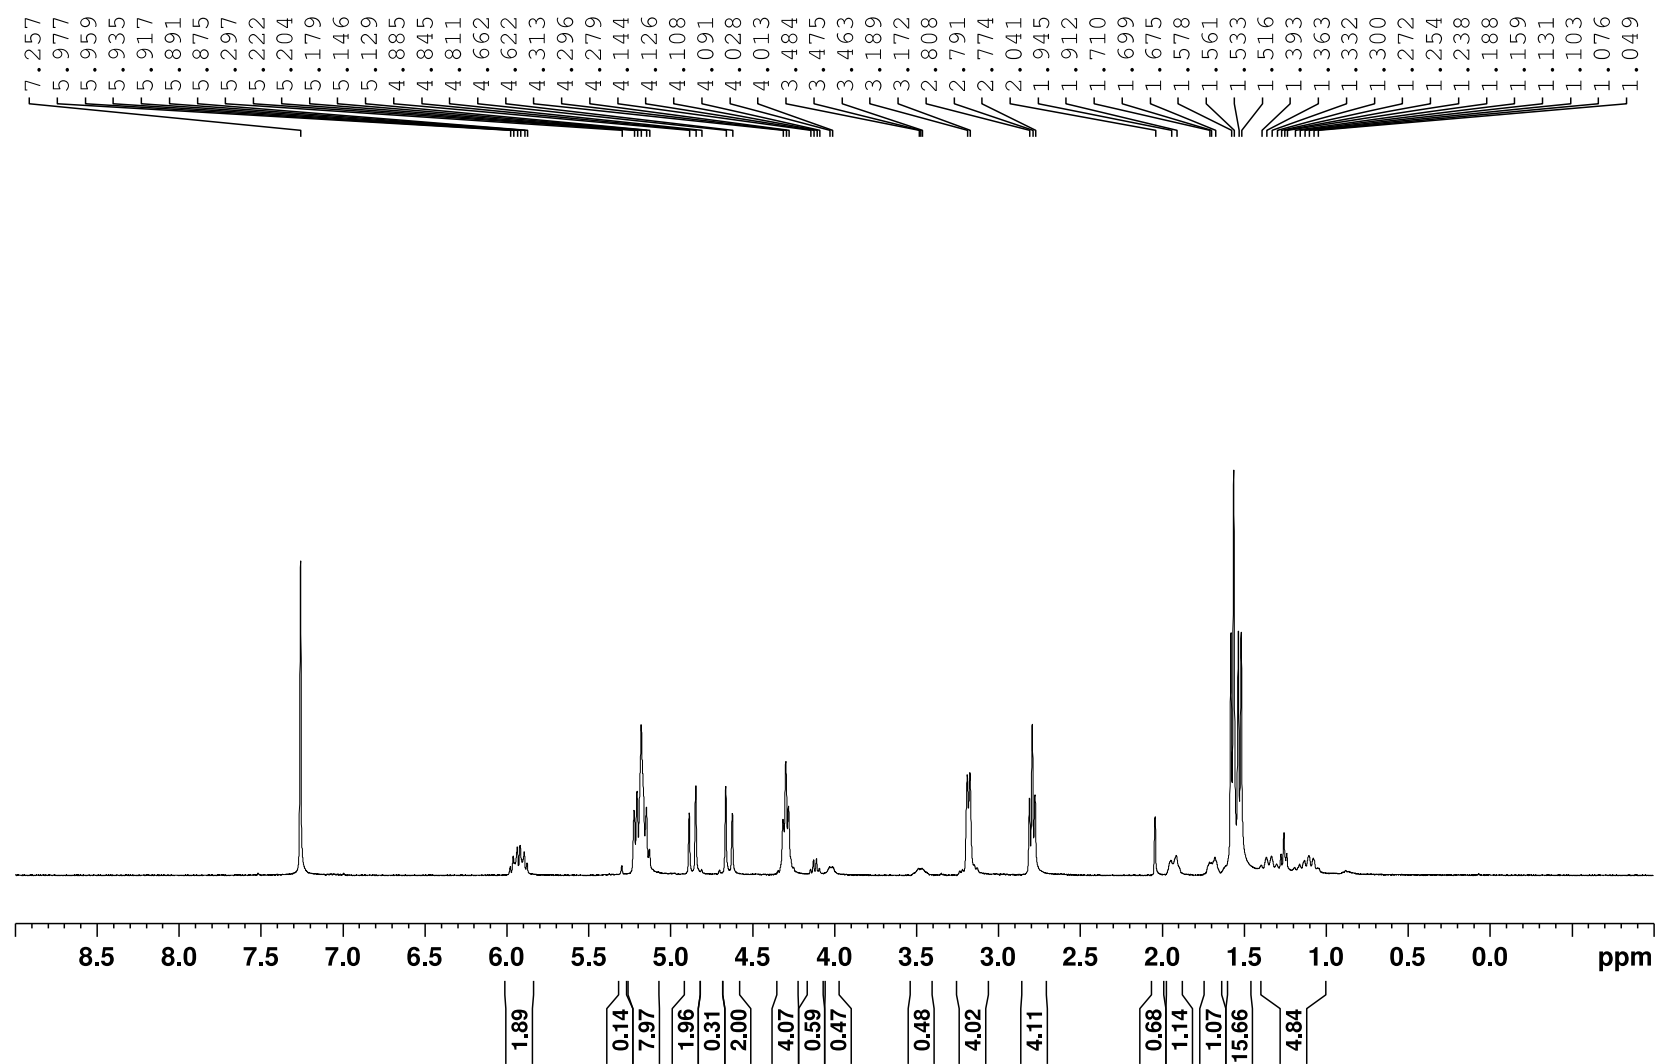

JHS-2066; BLGL-Thio-LGLB; CDCl<sub>3</sub>; 13C; 400a; 1024 scans; 8/1/16

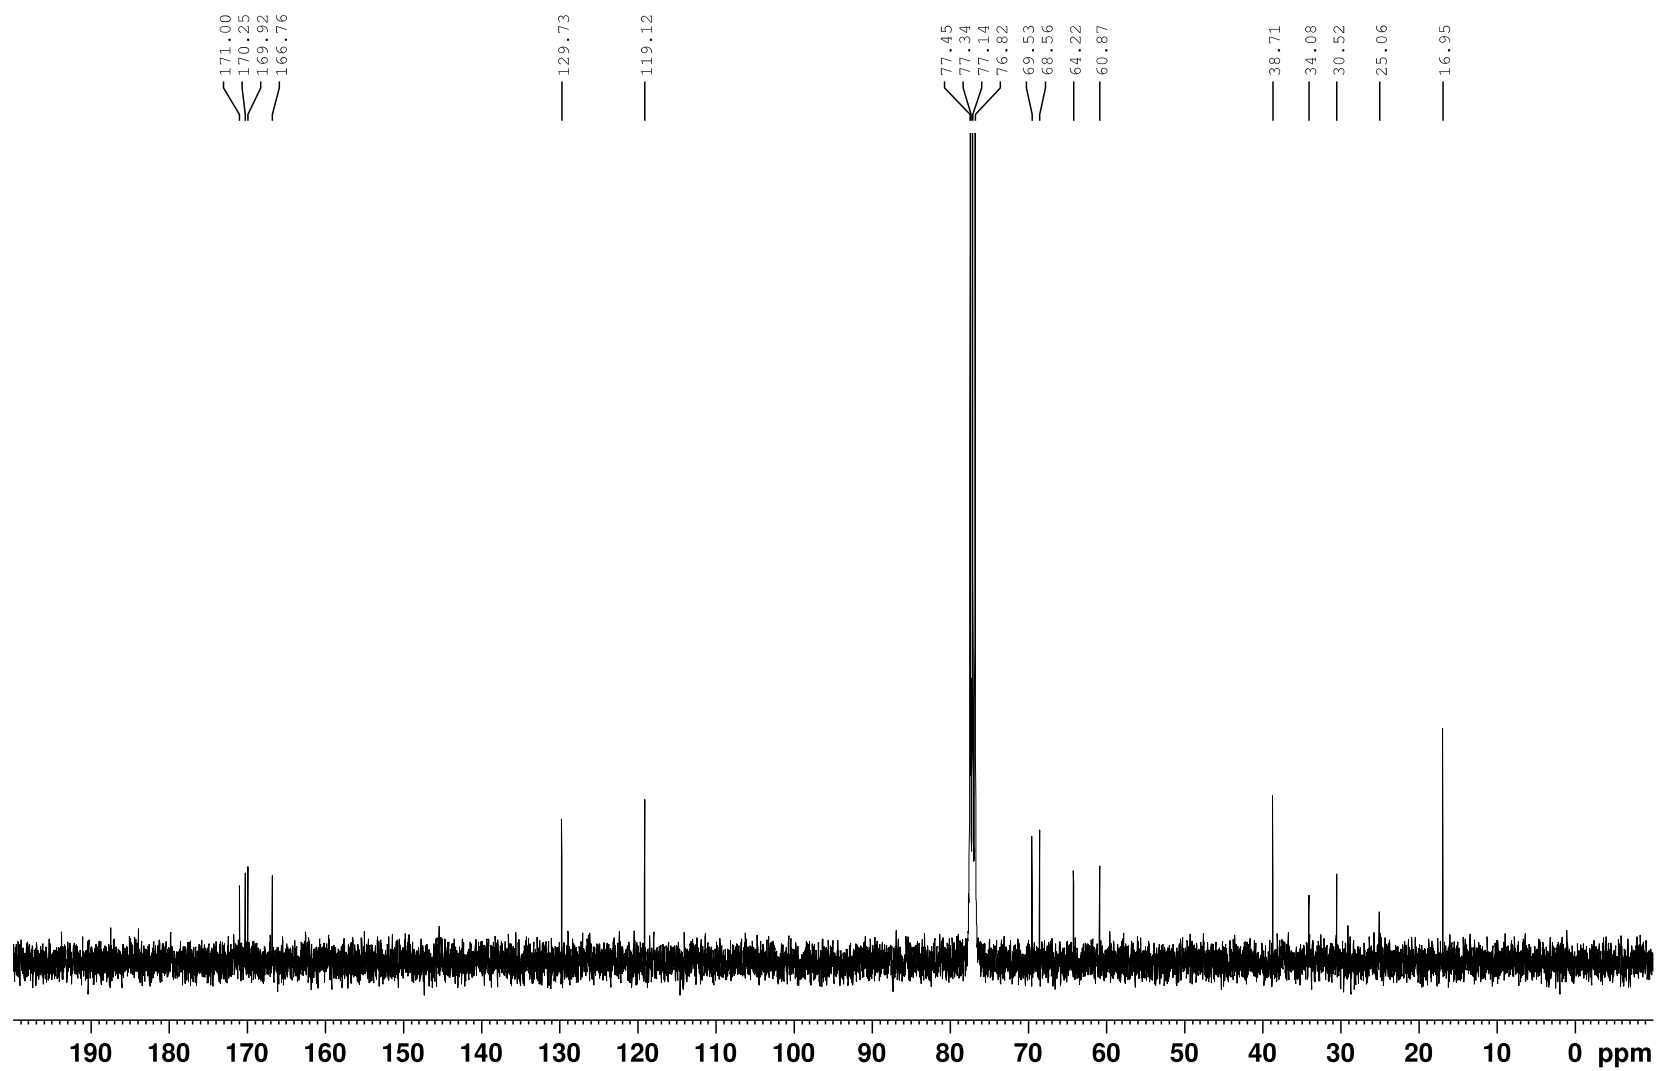



| Cyclic Thio Monomer                                                               |           |      |                                                      | <sup>13</sup> C-NMR (500 MHz, CDCl <sub>3</sub> )                                                                                                                                                                                                         | HRMS (ESI)                                                                                        |
|-----------------------------------------------------------------------------------|-----------|------|------------------------------------------------------|-----------------------------------------------------------------------------------------------------------------------------------------------------------------------------------------------------------------------------------------------------------|---------------------------------------------------------------------------------------------------|
| 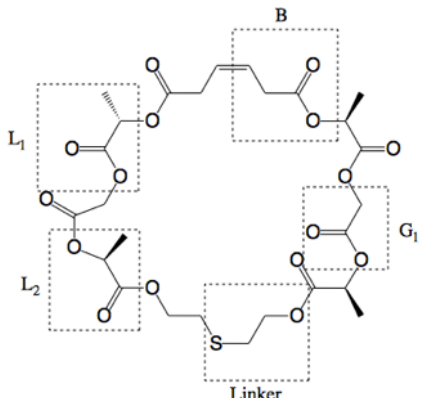 |           |      |                                                      | δ (ppm) + Assignment                                                                                                                                                                                                                                      | <u>Calc. Mass</u><br>634.16 g/mol                                                                 |
|                                                                                   |           |      |                                                      | 16.96 L (CH <sub>3</sub> )<br>16.98 L (CH <sub>3</sub> )<br>30.70 CH <sub>2</sub><br>37.66 CH <sub>2</sub><br>61.05 CH <sub>2</sub><br>64.86 CH <sub>2</sub><br>68.68 CH<br>69.79 CH<br>125.96 B (CH)<br>166.75 CO<br>169.99 CO<br>170.12 CO<br>170.80 CO | <u>Calc.</u><br>635.16 [M + H] <sup>+</sup><br><br><u>Found</u><br>635.16390 [M + H] <sup>+</sup> |
| <sup>1</sup> H-NMR (400 MHz, CDCl <sub>3</sub> )                                  |           |      |                                                      |                                                                                                                                                                                                                                                           |                                                                                                   |
| δ (ppm)                                                                           | Mult. (J) | Int. | Assignment                                           |                                                                                                                                                                                                                                                           |                                                                                                   |
| 1.52                                                                              | d (6.8)   | 6    | L <sub>1</sub> CH <sub>3</sub>                       |                                                                                                                                                                                                                                                           |                                                                                                   |
| 1.54                                                                              | d (6.8)   | 6    | L <sub>2</sub> CH <sub>3</sub>                       |                                                                                                                                                                                                                                                           |                                                                                                   |
| 2.82                                                                              | t (13.6)  | 2    | Linker CH <sub>2</sub> α to S                        |                                                                                                                                                                                                                                                           |                                                                                                   |
| 3.19                                                                              | m         | 4    | B CH <sub>2</sub>                                    |                                                                                                                                                                                                                                                           |                                                                                                   |
| 4.31                                                                              | m         | 4    | Linker CH <sub>2</sub> β to S                        |                                                                                                                                                                                                                                                           |                                                                                                   |
| 4.69                                                                              | d (16)    | 2    | G <sub>1</sub>                                       |                                                                                                                                                                                                                                                           |                                                                                                   |
| 4.79                                                                              | d (16)    | 2    | G <sub>1</sub>                                       |                                                                                                                                                                                                                                                           |                                                                                                   |
| 5.18                                                                              | m         | 4    | L <sub>1</sub> & L <sub>2</sub> Methyne, B Methylene |                                                                                                                                                                                                                                                           |                                                                                                   |
| 5.76                                                                              | t (7.6)   | 1.5  | B trans olefin                                       |                                                                                                                                                                                                                                                           |                                                                                                   |
| 5.82                                                                              | t (10)    | 0.4  | B cis olefin                                         |                                                                                                                                                                                                                                                           |                                                                                                   |
|                                                                                   |           |      |                                                      | <u>Composition</u><br>C <sub>26</sub> H <sub>34</sub> O <sub>16</sub> S                                                                                                                                                                                   |                                                                                                   |

**BLGL-Thio-LGLB** (185 mg, 0.28 mmol, 1 eq) was dissolved in dry DCM (300 mL, 0.001M) in a flame-dried Schlenk flask under nitrogen. A stock solution of Grubbs 2 (32 mg, 0.042 mmol, 15 mol%) in dry DCM was added and allowed to stir at RT overnight. Upon consumption of starting material by TLC, reaction mixture was quenched by addition of excess ethyl vinyl ether and stirring for 10 additional min. The reaction mixture was then concentrated and the crude solid was purified via column chromatography (silica, EtOAc/hexanes) to yield a thick brown oil (112 mg, 63% yield).

Thio Monomer; CDCl<sub>3</sub>; 1H; 400a; 16 Scans;  
12/2/16

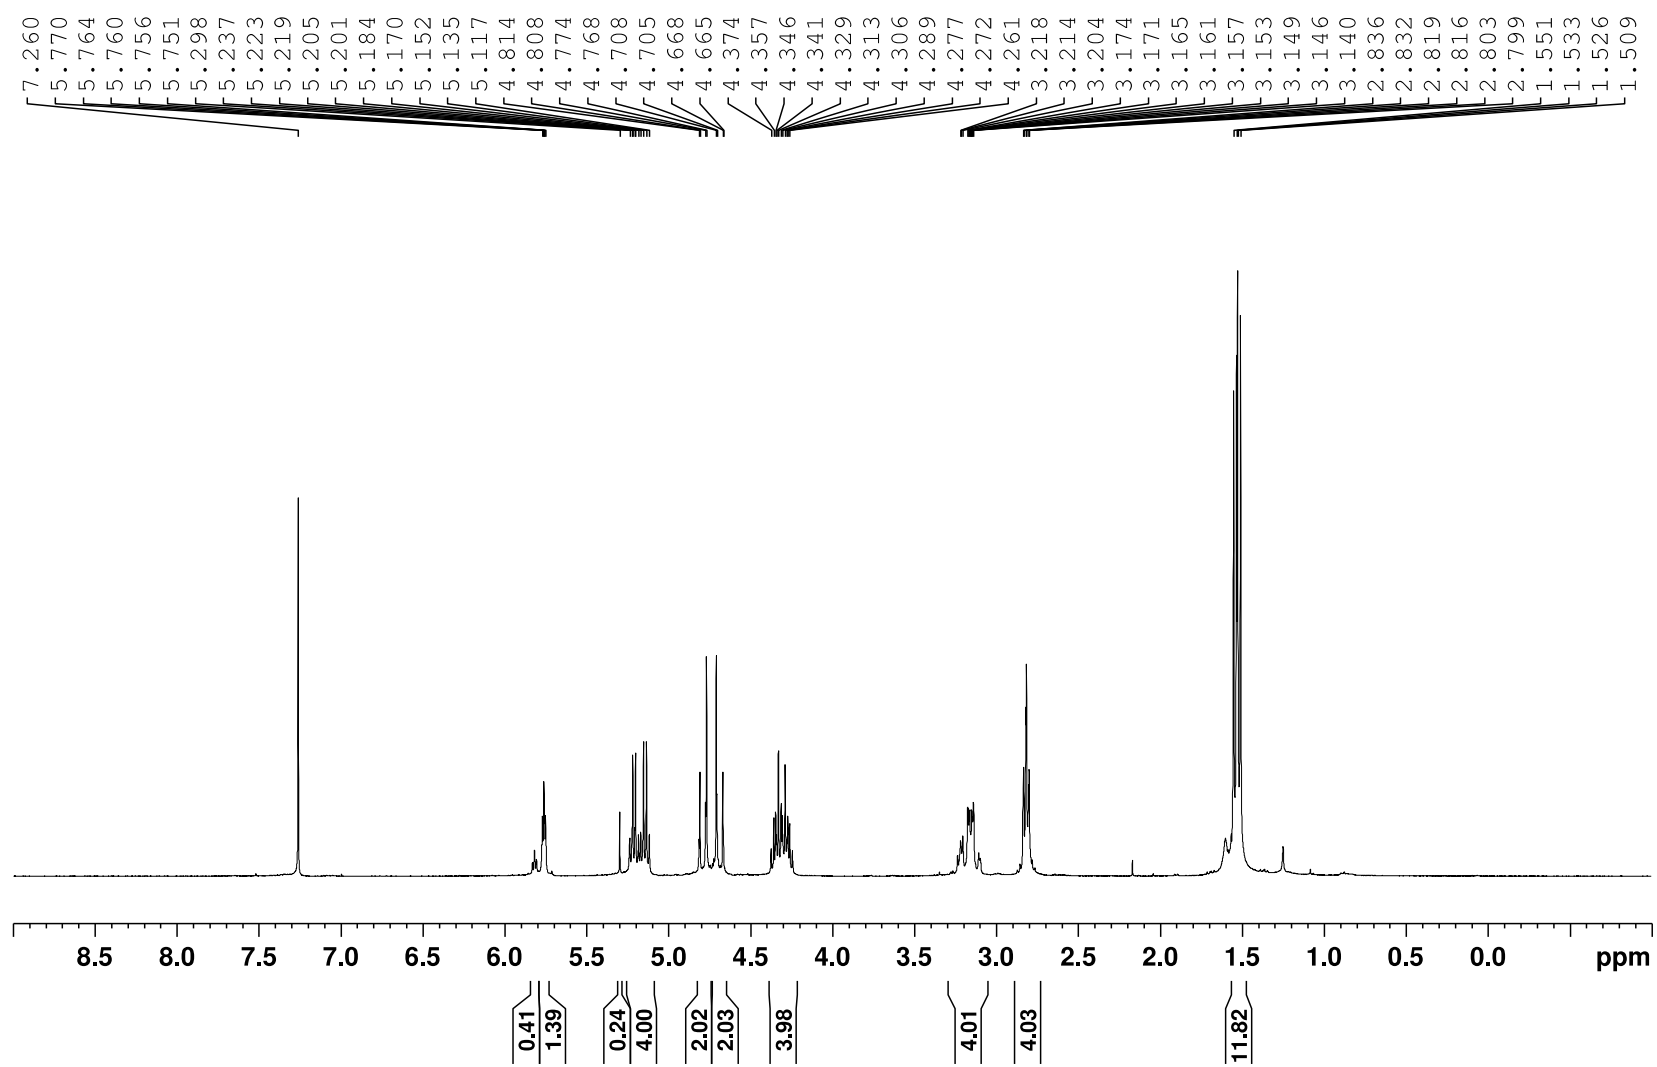

Thio Monomer; CDCl<sub>3</sub>; 13C; 400a; 2048 Scans;  
12/2/16

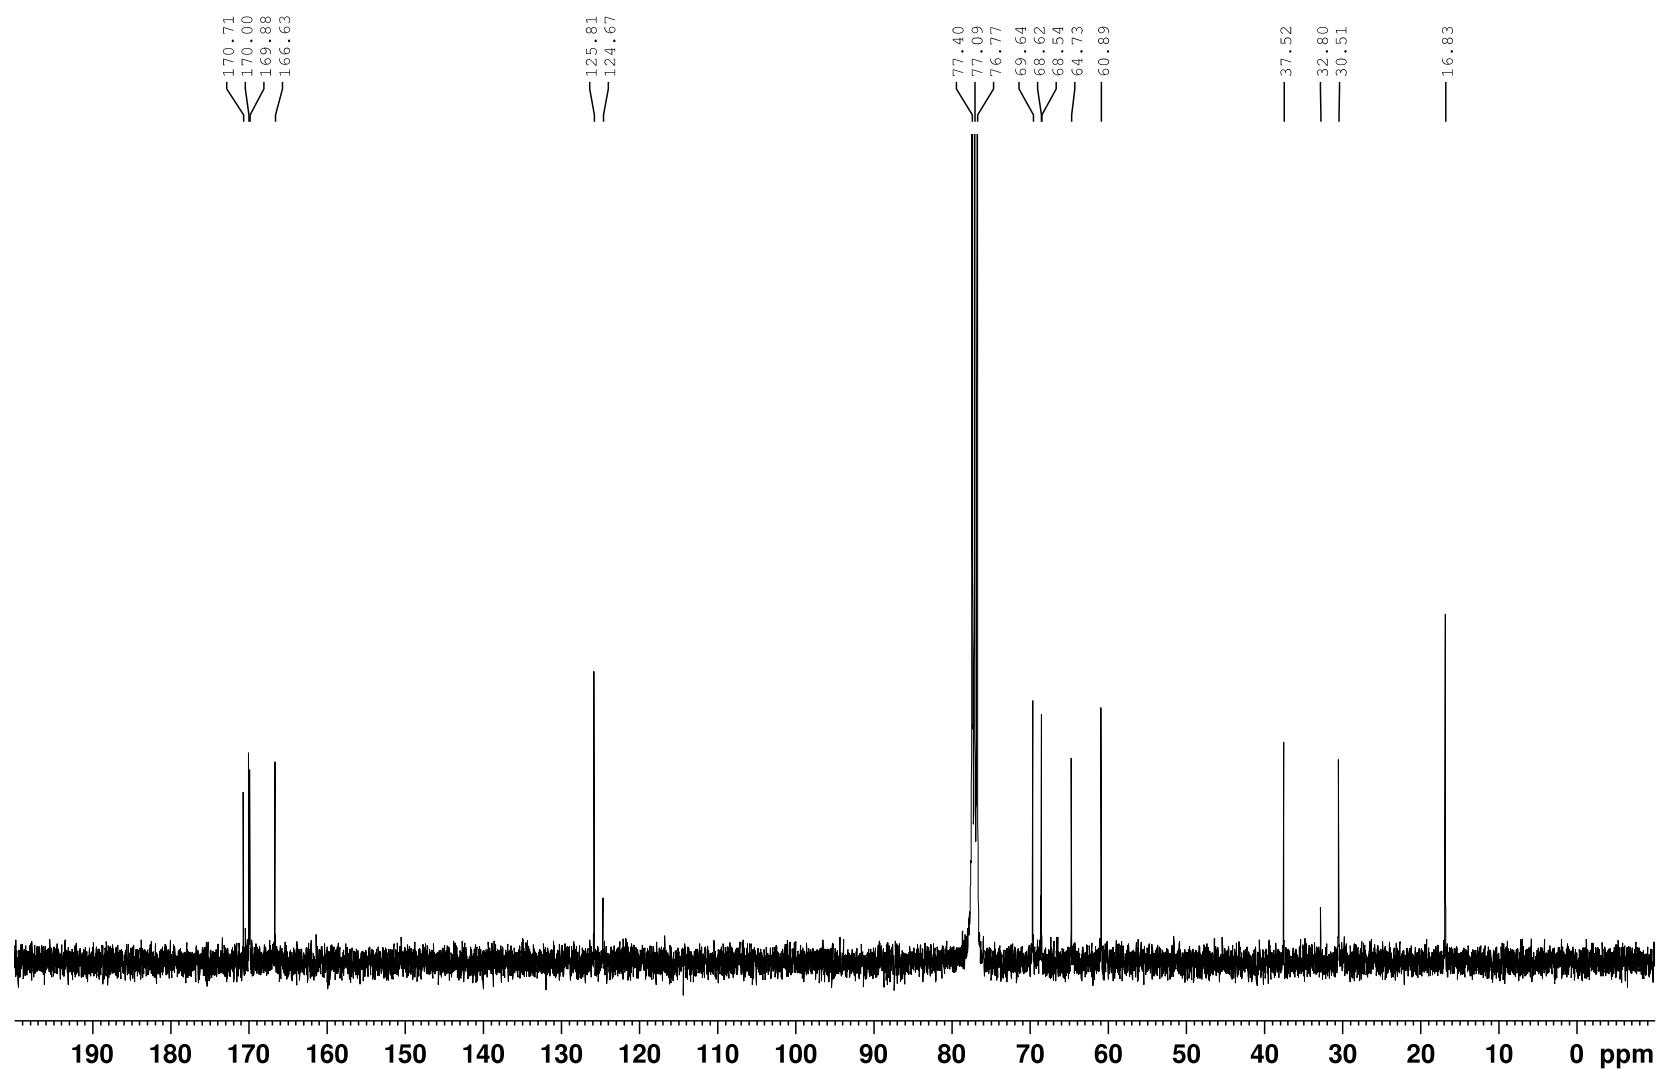

| <b>Poly(Thio)</b>                                                                  |           |      |                                    | <sup>13</sup> C-NMR (500 MHz, CDCl <sub>3</sub> ) |                                   | HRMS (ESI)                        |
|------------------------------------------------------------------------------------|-----------|------|------------------------------------|---------------------------------------------------|-----------------------------------|-----------------------------------|
| 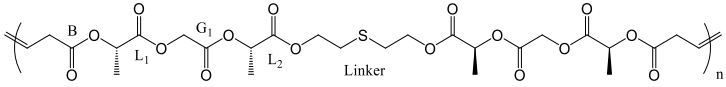 |           |      |                                    | δ (ppm) + Assignment                              |                                   | <u>M<sub>n</sub></u><br>22,452 Da |
| <sup>1</sup> H-NMR (400 MHz, CDCl <sub>3</sub> )                                   |           |      |                                    |                                                   |                                   |                                   |
| δ (ppm)                                                                            | Mult. (J) | Int. | Assignment                         |                                                   |                                   | <u>D</u><br>1.54                  |
| 1.53                                                                               | d (6.8)   | 6    | L <sub>1</sub> CH <sub>3</sub>     | 16.93                                             | CH <sub>3</sub> (L)               |                                   |
| 1.57                                                                               | d (6.8)   | 6    | L <sub>2</sub> CH <sub>3</sub>     | 30.53                                             | CH <sub>2</sub> (Linker)          |                                   |
| 2.79                                                                               | t (6.8)   | 4    | Linker CH <sub>2</sub> α to S      | 37.40                                             | CH <sub>2</sub> (Linker)          |                                   |
| 3.19                                                                               | m         | 4    | B Terminal CH <sub>2</sub>         | 60.85                                             | CH <sub>2</sub> (G <sub>1</sub> ) |                                   |
| 4.29                                                                               | m         | 4    | Linker CH <sub>2</sub> β to S      | 64.20                                             | CH <sub>2</sub> (B)               |                                   |
| 4.64                                                                               | d (16)    | 2    | G <sub>1</sub>                     | 68.60                                             | CH (L)                            |                                   |
| 4.87                                                                               | d (16)    | 2    | G <sub>1</sub>                     | 69.51                                             | CH (L)                            |                                   |
| 5.16                                                                               | m         | 4    | L <sub>1</sub> & L <sub>2</sub> CH | 124.42                                            | CH (B Cis)                        |                                   |
| 5.72                                                                               | m         | 1.6  | B CH Trans                         | 125.83                                            | CH (B Trans)                      |                                   |
| 5.81                                                                               | m         | 0.4  | B CH Cis                           | 166.72                                            | CO                                |                                   |
|                                                                                    |           |      |                                    | 169.87                                            | CO                                |                                   |
|                                                                                    |           |      |                                    | 170.17                                            | CO                                |                                   |
|                                                                                    |           |      |                                    | 170.87                                            | CO                                |                                   |

**Cyclic Thio Monomer** (55 mg, 0.087 mmol, 1 eq.) was weighed in a flame dried 1 mL vial under nitrogen. A stock solution of Grubbs II (2.2 mg, 0.0026 mmol, 3 mol%) in dry THF (17.8 mg/mL, 0.124 mL, 0.7M) was added and stirred at 60°C for 4 h. The reaction mixture was quenched by the addition of excess ethyl vinyl ether and vortexing. Solution was concentrated to yield a crude solid polymer, which was reprecipitated into a stirring solution of MeOH and filtered to collect pure polymer as a brown solid (46 mg, 83% yield).

JHS-4047; Poly(Thio) Pure; CDCl<sub>3</sub>; 1H; 400a;  
16 Scans; 7/11/17

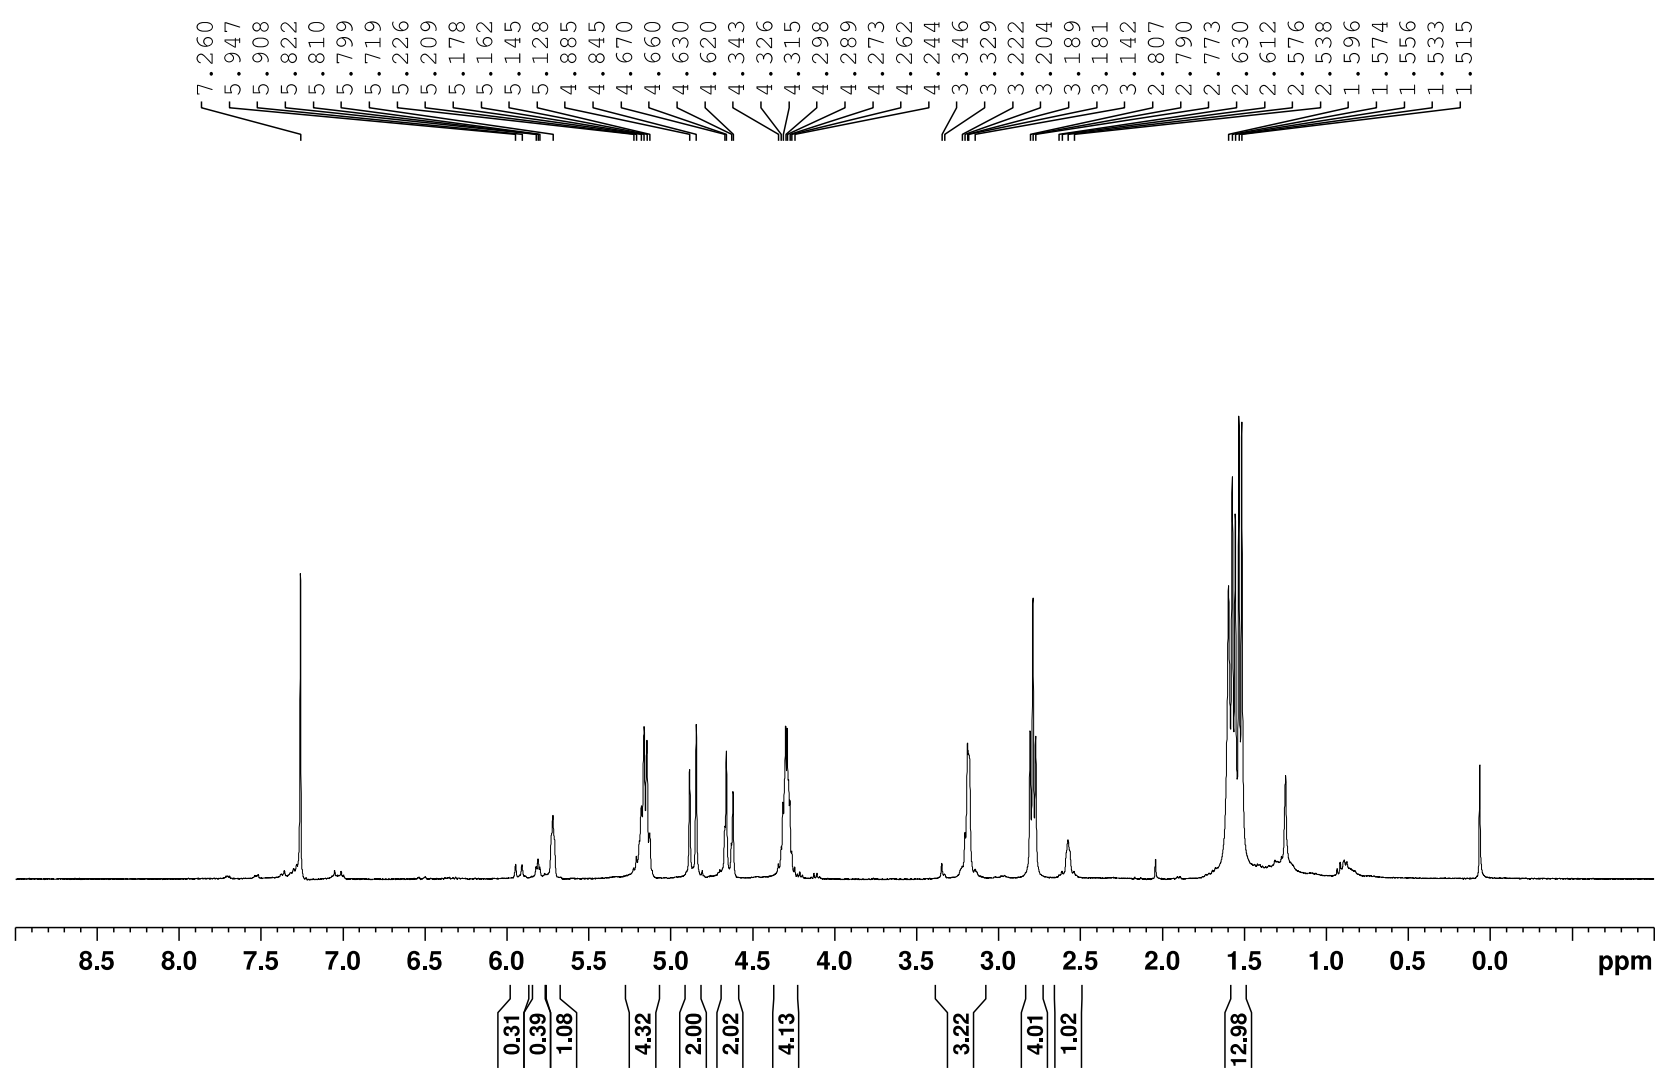

JHS-4047; Poly(Thio); CDCl<sub>3</sub>; 13C; 500; 256 Scan  
10/27/17

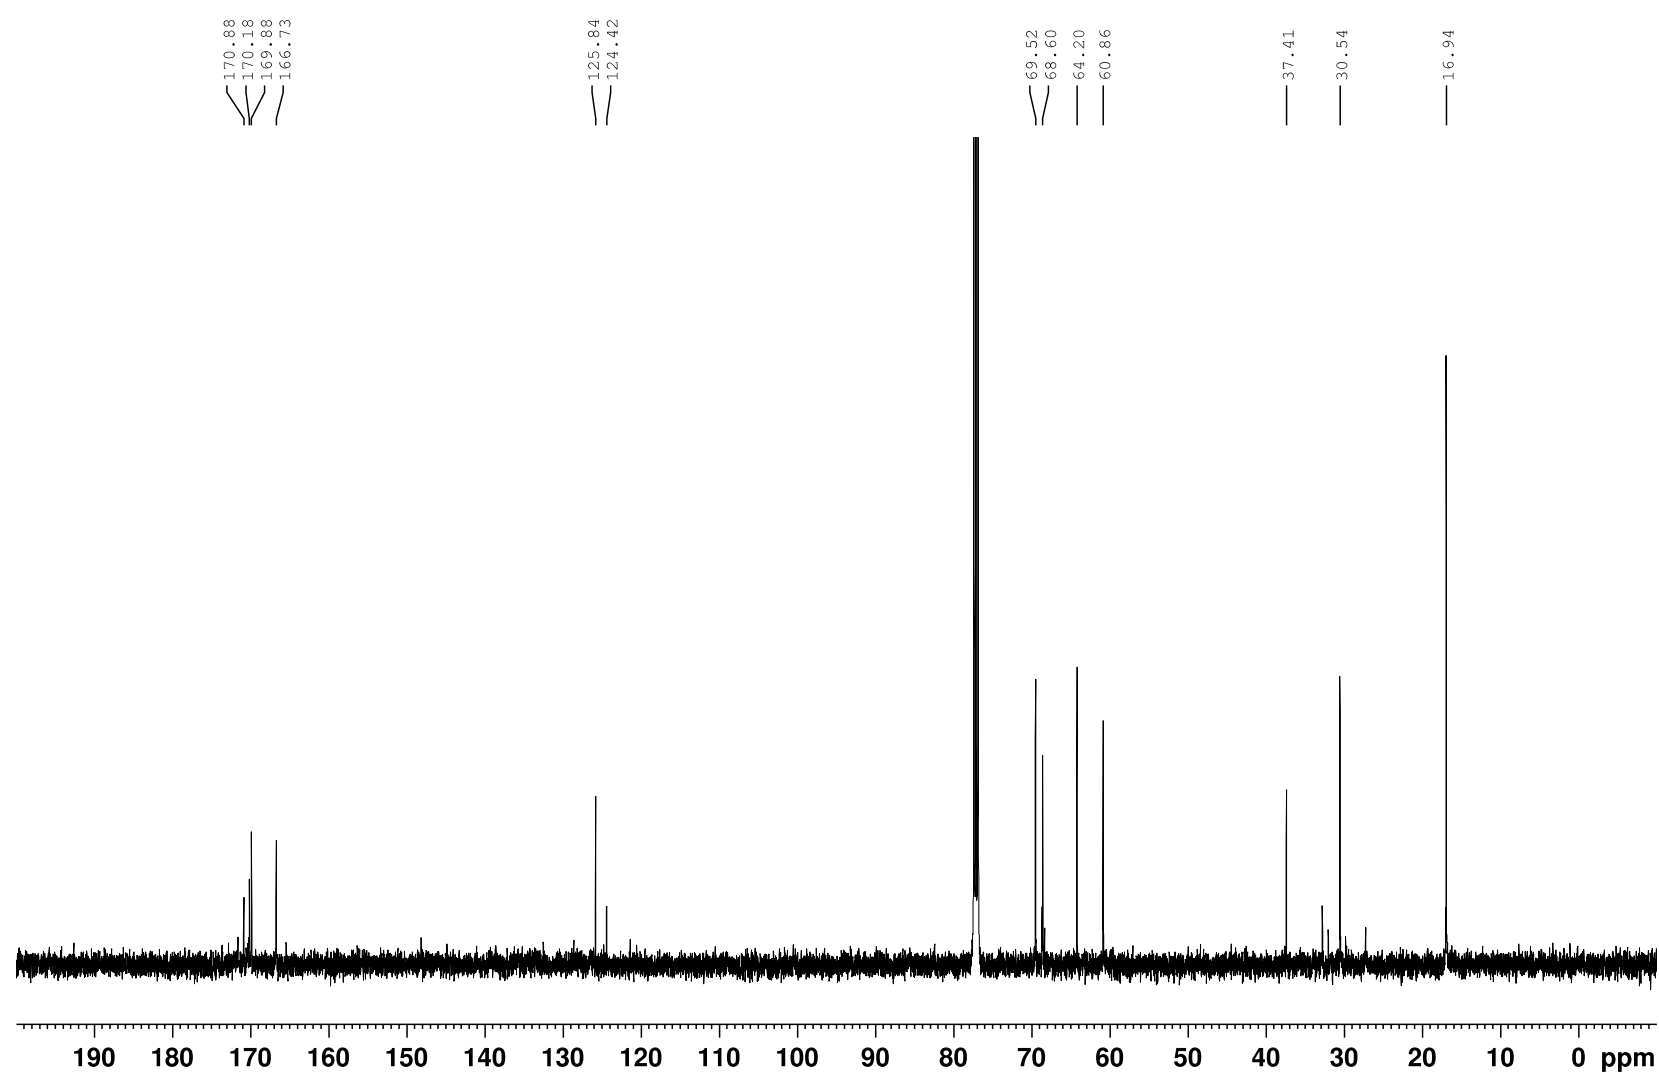

## 2.6 UREA LINKER CONTAINING COMPOUNDS

| Si-LGL-Urea-LGL-Si                                                                                                                                                                                                                                                                                                                                                                                                                                                                                                                                                                                                                                                                                                                                                                                                                                                                                                                                                                                                                                                                             |          |                                |                     | <sup>13</sup> C-NMR (400 MHz, CDCl <sub>3</sub> )                                                    |           | HRMS (ESI)        |                                   |       |         |    |         |       |   |    |           |      |         |   |                                   |      |         |   |                                   |      |   |   |                                  |      |   |   |                                  |      |          |   |                     |      |   |   |                |      |          |   |                     |      |          |   |                |                           |  |                                                    |  |
|------------------------------------------------------------------------------------------------------------------------------------------------------------------------------------------------------------------------------------------------------------------------------------------------------------------------------------------------------------------------------------------------------------------------------------------------------------------------------------------------------------------------------------------------------------------------------------------------------------------------------------------------------------------------------------------------------------------------------------------------------------------------------------------------------------------------------------------------------------------------------------------------------------------------------------------------------------------------------------------------------------------------------------------------------------------------------------------------|----------|--------------------------------|---------------------|------------------------------------------------------------------------------------------------------|-----------|-------------------|-----------------------------------|-------|---------|----|---------|-------|---|----|-----------|------|---------|---|-----------------------------------|------|---------|---|-----------------------------------|------|---|---|----------------------------------|------|---|---|----------------------------------|------|----------|---|---------------------|------|---|---|----------------|------|----------|---|---------------------|------|----------|---|----------------|---------------------------|--|----------------------------------------------------|--|
| 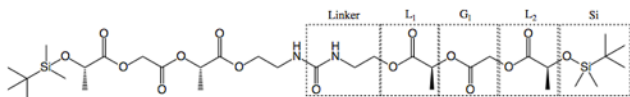                                                                                                                                                                                                                                                                                                                                                                                                                                                                                                                                                                                                                                                                                                                                                                                                                                                                                                                                                                                                             |          |                                |                     | δ (ppm) + Assignment                                                                                 |           | <u>Calc. Mass</u> |                                   |       |         |    |         |       |   |    |           |      |         |   |                                   |      |         |   |                                   |      |   |   |                                  |      |   |   |                                  |      |          |   |                     |      |   |   |                |      |          |   |                     |      |          |   |                |                           |  |                                                    |  |
|                                                                                                                                                                                                                                                                                                                                                                                                                                                                                                                                                                                                                                                                                                                                                                                                                                                                                                                                                                                                                                                                                                |          |                                |                     | -4.85 CH <sub>3</sub> (Si)                                                                           |           | 780.35 amu        |                                   |       |         |    |         |       |   |    |           |      |         |   |                                   |      |         |   |                                   |      |   |   |                                  |      |   |   |                                  |      |          |   |                     |      |   |   |                |      |          |   |                     |      |          |   |                |                           |  |                                                    |  |
| <sup>1</sup> H-NMR (400 MHz, CDCl <sub>3</sub> ) <table border="1" style="width: 100%; border-collapse: collapse;"> <thead> <tr> <th>dδ (ppm)</th> <th>Mult. (J)</th> <th>Int.</th> <th>Assignment</th> </tr> </thead> <tbody> <tr> <td>0.102</td> <td>d (3.2)</td> <td>12</td> <td>Si (Me)</td> </tr> <tr> <td>0.903</td> <td>s</td> <td>18</td> <td>Si (t-Bu)</td> </tr> <tr> <td>1.46</td> <td>d (6.8)</td> <td>6</td> <td>L<sub>2</sub> (CH<sub>3</sub>)</td> </tr> <tr> <td>1.51</td> <td>d (7.2)</td> <td>6</td> <td>L<sub>1</sub> (CH<sub>3</sub>)</td> </tr> <tr> <td>3.42</td> <td>m</td> <td>4</td> <td>Linker (CH<sub>2</sub> α-amide)</td> </tr> <tr> <td>4.20</td> <td>m</td> <td>4</td> <td>Linker (CH<sub>2</sub> β-amide)</td> </tr> <tr> <td>4.46</td> <td>q (20.4)</td> <td>2</td> <td>L<sub>2</sub> (CH)</td> </tr> <tr> <td>4.73</td> <td>s</td> <td>4</td> <td>G<sub>1</sub></td> </tr> <tr> <td>5.13</td> <td>q (20.8)</td> <td>4</td> <td>L<sub>1</sub> (CH)</td> </tr> <tr> <td>5.37</td> <td>t (11.6)</td> <td>2</td> <td>Linker (amide)</td> </tr> </tbody> </table> |          |                                |                     | dδ (ppm)                                                                                             | Mult. (J) | Int.              | Assignment                        | 0.102 | d (3.2) | 12 | Si (Me) | 0.903 | s | 18 | Si (t-Bu) | 1.46 | d (6.8) | 6 | L <sub>2</sub> (CH <sub>3</sub> ) | 1.51 | d (7.2) | 6 | L <sub>1</sub> (CH <sub>3</sub> ) | 3.42 | m | 4 | Linker (CH <sub>2</sub> α-amide) | 4.20 | m | 4 | Linker (CH <sub>2</sub> β-amide) | 4.46 | q (20.4) | 2 | L <sub>2</sub> (CH) | 4.73 | s | 4 | G <sub>1</sub> | 5.13 | q (20.8) | 4 | L <sub>1</sub> (CH) | 5.37 | t (11.6) | 2 | Linker (amide) | 16.99 CH <sub>3</sub> (L) |  | <u>Calc.</u><br>[M + H] <sup>+</sup><br>781.35 amu |  |
|                                                                                                                                                                                                                                                                                                                                                                                                                                                                                                                                                                                                                                                                                                                                                                                                                                                                                                                                                                                                                                                                                                |          |                                |                     | dδ (ppm)                                                                                             | Mult. (J) | Int.              | Assignment                        |       |         |    |         |       |   |    |           |      |         |   |                                   |      |         |   |                                   |      |   |   |                                  |      |   |   |                                  |      |          |   |                     |      |   |   |                |      |          |   |                     |      |          |   |                |                           |  |                                                    |  |
|                                                                                                                                                                                                                                                                                                                                                                                                                                                                                                                                                                                                                                                                                                                                                                                                                                                                                                                                                                                                                                                                                                |          |                                |                     | 0.102                                                                                                | d (3.2)   | 12                | Si (Me)                           |       |         |    |         |       |   |    |           |      |         |   |                                   |      |         |   |                                   |      |   |   |                                  |      |   |   |                                  |      |          |   |                     |      |   |   |                |      |          |   |                     |      |          |   |                |                           |  |                                                    |  |
|                                                                                                                                                                                                                                                                                                                                                                                                                                                                                                                                                                                                                                                                                                                                                                                                                                                                                                                                                                                                                                                                                                |          |                                |                     | 0.903                                                                                                | s         | 18                | Si (t-Bu)                         |       |         |    |         |       |   |    |           |      |         |   |                                   |      |         |   |                                   |      |   |   |                                  |      |   |   |                                  |      |          |   |                     |      |   |   |                |      |          |   |                     |      |          |   |                |                           |  |                                                    |  |
|                                                                                                                                                                                                                                                                                                                                                                                                                                                                                                                                                                                                                                                                                                                                                                                                                                                                                                                                                                                                                                                                                                |          |                                |                     | 1.46                                                                                                 | d (6.8)   | 6                 | L <sub>2</sub> (CH <sub>3</sub> ) |       |         |    |         |       |   |    |           |      |         |   |                                   |      |         |   |                                   |      |   |   |                                  |      |   |   |                                  |      |          |   |                     |      |   |   |                |      |          |   |                     |      |          |   |                |                           |  |                                                    |  |
|                                                                                                                                                                                                                                                                                                                                                                                                                                                                                                                                                                                                                                                                                                                                                                                                                                                                                                                                                                                                                                                                                                |          |                                |                     | 1.51                                                                                                 | d (7.2)   | 6                 | L <sub>1</sub> (CH <sub>3</sub> ) |       |         |    |         |       |   |    |           |      |         |   |                                   |      |         |   |                                   |      |   |   |                                  |      |   |   |                                  |      |          |   |                     |      |   |   |                |      |          |   |                     |      |          |   |                |                           |  |                                                    |  |
|                                                                                                                                                                                                                                                                                                                                                                                                                                                                                                                                                                                                                                                                                                                                                                                                                                                                                                                                                                                                                                                                                                |          |                                |                     | 3.42                                                                                                 | m         | 4                 | Linker (CH <sub>2</sub> α-amide)  |       |         |    |         |       |   |    |           |      |         |   |                                   |      |         |   |                                   |      |   |   |                                  |      |   |   |                                  |      |          |   |                     |      |   |   |                |      |          |   |                     |      |          |   |                |                           |  |                                                    |  |
|                                                                                                                                                                                                                                                                                                                                                                                                                                                                                                                                                                                                                                                                                                                                                                                                                                                                                                                                                                                                                                                                                                |          |                                |                     | 4.20                                                                                                 | m         | 4                 | Linker (CH <sub>2</sub> β-amide)  |       |         |    |         |       |   |    |           |      |         |   |                                   |      |         |   |                                   |      |   |   |                                  |      |   |   |                                  |      |          |   |                     |      |   |   |                |      |          |   |                     |      |          |   |                |                           |  |                                                    |  |
|                                                                                                                                                                                                                                                                                                                                                                                                                                                                                                                                                                                                                                                                                                                                                                                                                                                                                                                                                                                                                                                                                                |          |                                |                     | 4.46                                                                                                 | q (20.4)  | 2                 | L <sub>2</sub> (CH)               |       |         |    |         |       |   |    |           |      |         |   |                                   |      |         |   |                                   |      |   |   |                                  |      |   |   |                                  |      |          |   |                     |      |   |   |                |      |          |   |                     |      |          |   |                |                           |  |                                                    |  |
|                                                                                                                                                                                                                                                                                                                                                                                                                                                                                                                                                                                                                                                                                                                                                                                                                                                                                                                                                                                                                                                                                                |          |                                |                     | 4.73                                                                                                 | s         | 4                 | G <sub>1</sub>                    |       |         |    |         |       |   |    |           |      |         |   |                                   |      |         |   |                                   |      |   |   |                                  |      |   |   |                                  |      |          |   |                     |      |   |   |                |      |          |   |                     |      |          |   |                |                           |  |                                                    |  |
| 5.13                                                                                                                                                                                                                                                                                                                                                                                                                                                                                                                                                                                                                                                                                                                                                                                                                                                                                                                                                                                                                                                                                           | q (20.8) | 4                              | L <sub>1</sub> (CH) |                                                                                                      |           |                   |                                   |       |         |    |         |       |   |    |           |      |         |   |                                   |      |         |   |                                   |      |   |   |                                  |      |   |   |                                  |      |          |   |                     |      |   |   |                |      |          |   |                     |      |          |   |                |                           |  |                                                    |  |
| 5.37                                                                                                                                                                                                                                                                                                                                                                                                                                                                                                                                                                                                                                                                                                                                                                                                                                                                                                                                                                                                                                                                                           | t (11.6) | 2                              | Linker (amide)      |                                                                                                      |           |                   |                                   |       |         |    |         |       |   |    |           |      |         |   |                                   |      |         |   |                                   |      |   |   |                                  |      |   |   |                                  |      |          |   |                     |      |   |   |                |      |          |   |                     |      |          |   |                |                           |  |                                                    |  |
| 18.45 CH <sub>3</sub> (L)                                                                                                                                                                                                                                                                                                                                                                                                                                                                                                                                                                                                                                                                                                                                                                                                                                                                                                                                                                                                                                                                      |          | 39.08 CH <sub>2</sub> (Linker) |                     |                                                                                                      |           |                   |                                   |       |         |    |         |       |   |    |           |      |         |   |                                   |      |         |   |                                   |      |   |   |                                  |      |   |   |                                  |      |          |   |                     |      |   |   |                |      |          |   |                     |      |          |   |                |                           |  |                                                    |  |
| 21.55 t-Bu (Si)                                                                                                                                                                                                                                                                                                                                                                                                                                                                                                                                                                                                                                                                                                                                                                                                                                                                                                                                                                                                                                                                                |          | 60.88 CH <sub>2</sub> (G)      |                     | <u>Found</u><br>[M + H] <sup>+</sup><br>781.35900 amu                                                |           |                   |                                   |       |         |    |         |       |   |    |           |      |         |   |                                   |      |         |   |                                   |      |   |   |                                  |      |   |   |                                  |      |          |   |                     |      |   |   |                |      |          |   |                     |      |          |   |                |                           |  |                                                    |  |
| 25.82 t-Bu (Si)                                                                                                                                                                                                                                                                                                                                                                                                                                                                                                                                                                                                                                                                                                                                                                                                                                                                                                                                                                                                                                                                                |          | 65.51 CH <sub>2</sub> (Linker) |                     |                                                                                                      |           |                   |                                   |       |         |    |         |       |   |    |           |      |         |   |                                   |      |         |   |                                   |      |   |   |                                  |      |   |   |                                  |      |          |   |                     |      |   |   |                |      |          |   |                     |      |          |   |                |                           |  |                                                    |  |
| 68.19 CH (L)                                                                                                                                                                                                                                                                                                                                                                                                                                                                                                                                                                                                                                                                                                                                                                                                                                                                                                                                                                                                                                                                                   |          | 69.89 CH (L)                   |                     | <u>Composition</u><br>C <sub>33</sub> H <sub>60</sub> O <sub>15</sub> N <sub>2</sub> Si <sub>2</sub> |           |                   |                                   |       |         |    |         |       |   |    |           |      |         |   |                                   |      |         |   |                                   |      |   |   |                                  |      |   |   |                                  |      |          |   |                     |      |   |   |                |      |          |   |                     |      |          |   |                |                           |  |                                                    |  |
| 158.09 CO (Linker)                                                                                                                                                                                                                                                                                                                                                                                                                                                                                                                                                                                                                                                                                                                                                                                                                                                                                                                                                                                                                                                                             |          | 167.05 CO                      |                     |                                                                                                      |           |                   |                                   |       |         |    |         |       |   |    |           |      |         |   |                                   |      |         |   |                                   |      |   |   |                                  |      |   |   |                                  |      |          |   |                     |      |   |   |                |      |          |   |                     |      |          |   |                |                           |  |                                                    |  |
| 169.99 CO                                                                                                                                                                                                                                                                                                                                                                                                                                                                                                                                                                                                                                                                                                                                                                                                                                                                                                                                                                                                                                                                                      |          | 174.61 CO                      |                     |                                                                                                      |           |                   |                                   |       |         |    |         |       |   |    |           |      |         |   |                                   |      |         |   |                                   |      |   |   |                                  |      |   |   |                                  |      |          |   |                     |      |   |   |                |      |          |   |                     |      |          |   |                |                           |  |                                                    |  |
| 174.61 CO                                                                                                                                                                                                                                                                                                                                                                                                                                                                                                                                                                                                                                                                                                                                                                                                                                                                                                                                                                                                                                                                                      |          |                                |                     |                                                                                                      |           |                   |                                   |       |         |    |         |       |   |    |           |      |         |   |                                   |      |         |   |                                   |      |   |   |                                  |      |   |   |                                  |      |          |   |                     |      |   |   |                |      |          |   |                     |      |          |   |                |                           |  |                                                    |  |

LGL-Si (1.1 g, 3.3 mmol, 2.3 eq) and bis(hydroxyethyl)urea (0.218 g, 1.47 mmol, 1 eq) were dissolved in dry DCM (35 mL, 0.1 M) and added to a flame-dried vial under nitrogen. DPTS (0.195 g, 0.66 mmol, 0.45 eq) and DCC (0.697 g, 3.4 mmol, 2.3 eq) were then added to the reaction mixture sequentially and allowed to stir at RT overnight. Upon consumption of starting material by TLC, the reaction mixture was filtered to remove DCU, concentrated and crude oil was purified via column chromatography (silica, EtOAc/hexanes) to yield a colorless oil (1.04 g, 91% yield).

JHS-2058; Si-LGL-Urea-LGL-Si; CDCl<sub>3</sub>; 1H; 400a;  
16 Scans; 8/17/16

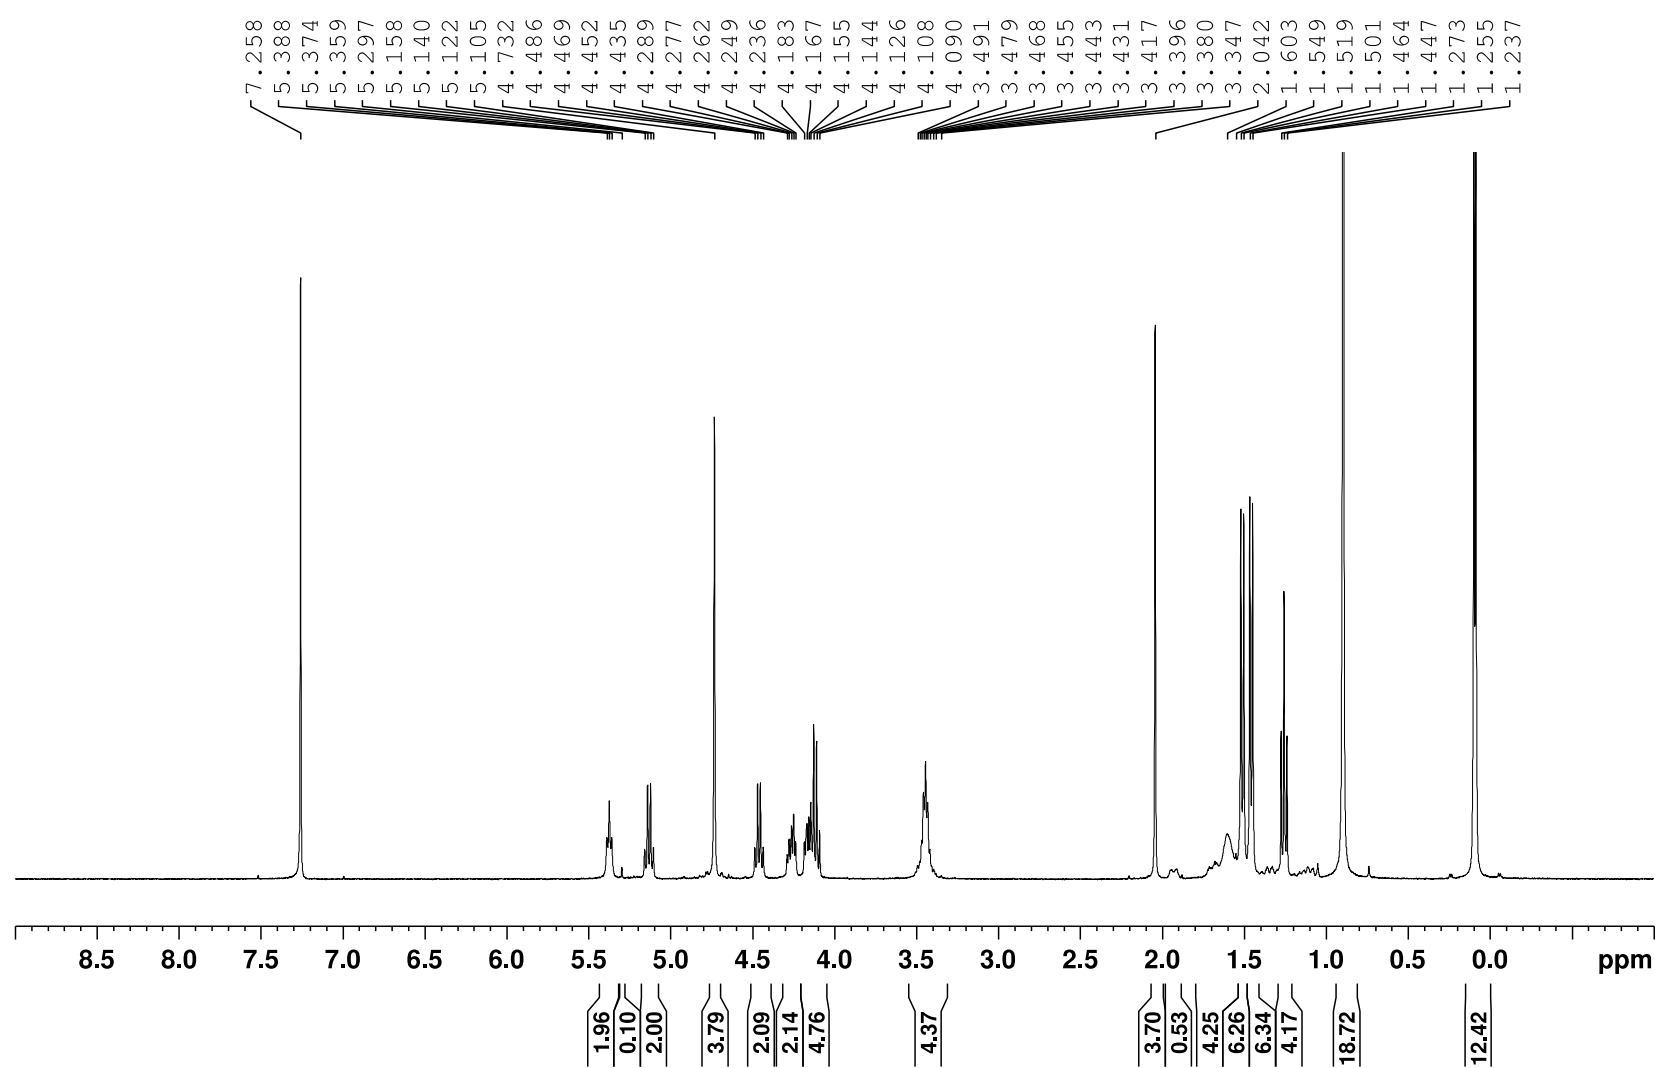

JHS-2058; Si-LGL-Urea-LGL-Si; CDCl<sub>3</sub>; 13C; 400a  
2048 Scans; 8/17/16

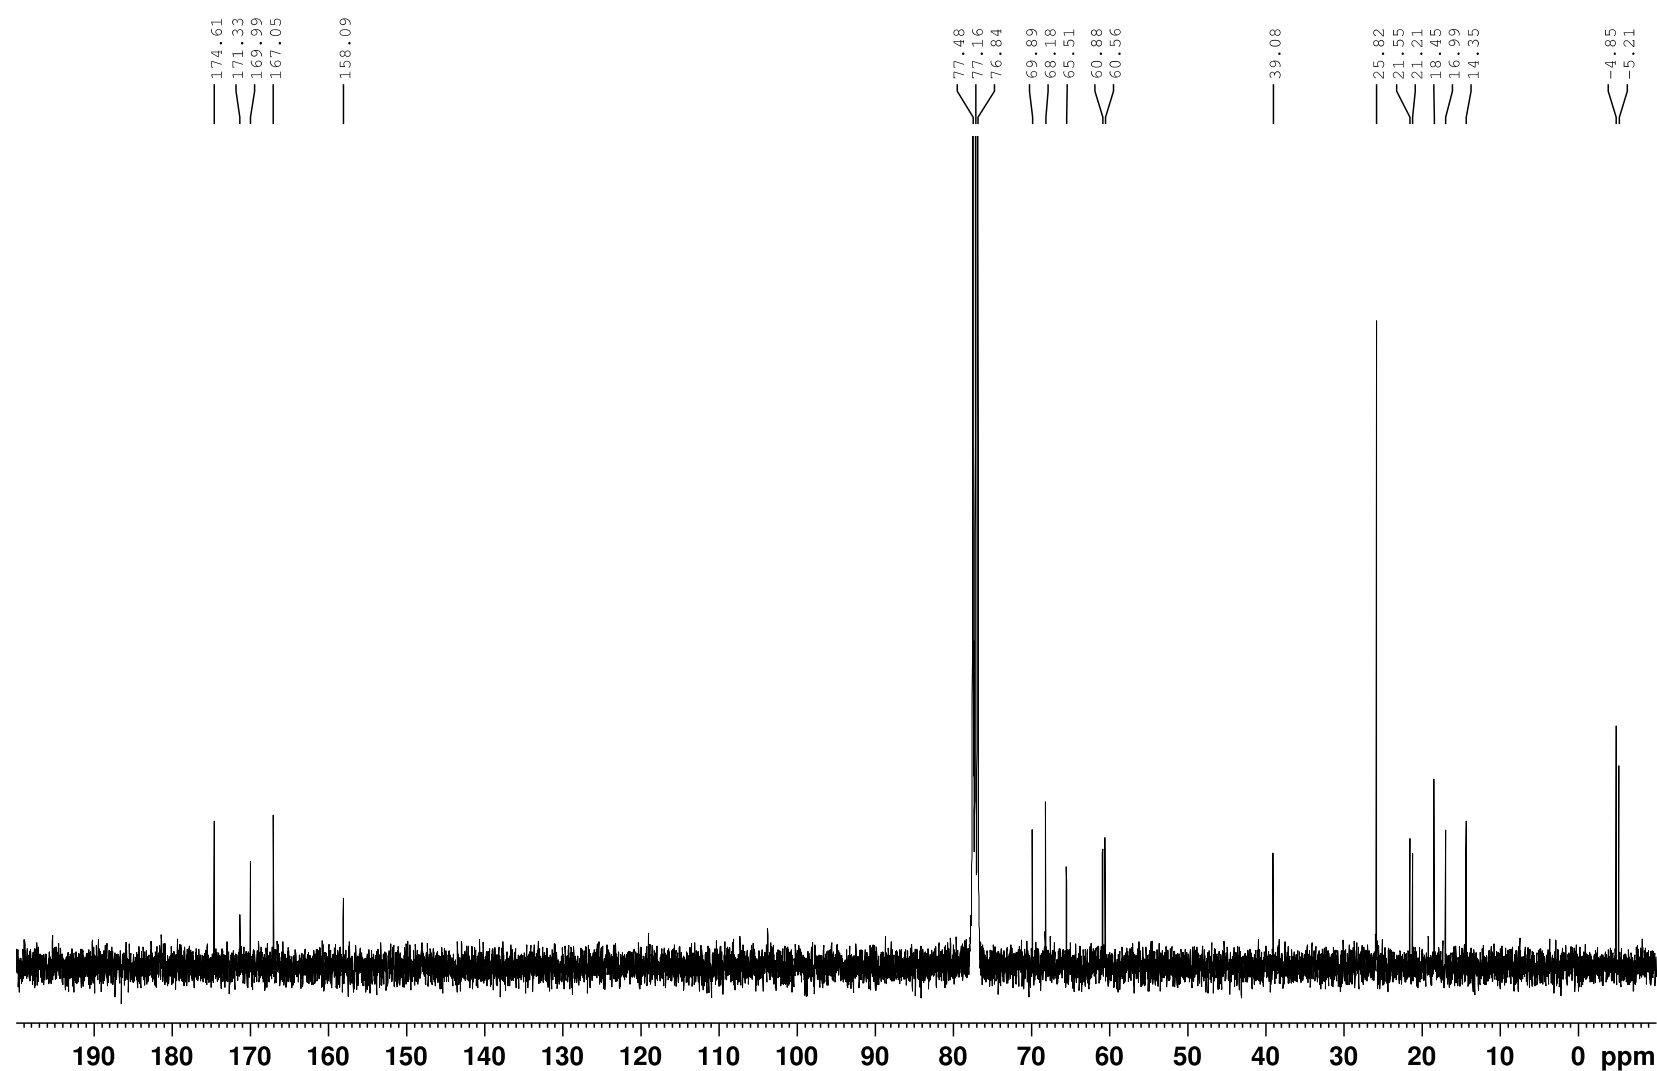

| LGL-Urea-LGL                                                                       |           |      |                                                               | <sup>13</sup> C-NMR (400 MHz, CDCl <sub>3</sub> ) | HRMS (ESI)                                                     |
|------------------------------------------------------------------------------------|-----------|------|---------------------------------------------------------------|---------------------------------------------------|----------------------------------------------------------------|
| 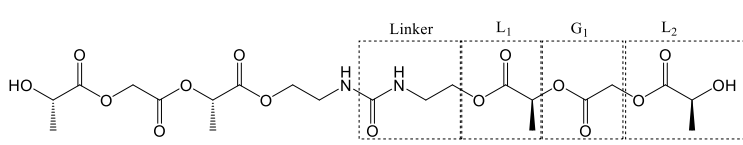 |           |      |                                                               | $\delta$ (ppm) + Assignment                       | <u>Calc. Mass</u>                                              |
|                                                                                    |           |      |                                                               | 16.93 CH <sub>3</sub> (L)                         | 552.18 amu                                                     |
|                                                                                    |           |      |                                                               | 20.35 CH <sub>3</sub> (L)                         |                                                                |
|                                                                                    |           |      |                                                               | 39.14 CH <sub>2</sub> (Linker)                    | <u>Calc.</u>                                                   |
|                                                                                    |           |      |                                                               | 61.20 CH <sub>2</sub> (G)                         | [M + H] <sup>+</sup>                                           |
|                                                                                    |           |      |                                                               | 65.91 CH <sub>2</sub> (Linker)                    | 553.19 amu                                                     |
|                                                                                    |           |      |                                                               | 66.90 CH (L)                                      |                                                                |
|                                                                                    |           |      |                                                               | 70.25 CH (L)                                      | <u>Found</u>                                                   |
|                                                                                    |           |      |                                                               | 158.00 CO (Linker)                                | [M + H] <sup>+</sup>                                           |
|                                                                                    |           |      |                                                               | 167.42 CO                                         | 553.18710                                                      |
|                                                                                    |           |      |                                                               | 170.18 CO                                         | amu                                                            |
|                                                                                    |           |      |                                                               | 175.76 CO                                         |                                                                |
|                                                                                    |           |      |                                                               |                                                   | <u>Composition</u>                                             |
|                                                                                    |           |      |                                                               |                                                   | C <sub>21</sub> H <sub>32</sub> O <sub>15</sub> N <sub>2</sub> |
| <sup>1</sup> H-NMR (400 MHz, CDCl <sub>3</sub> )                                   |           |      |                                                               |                                                   |                                                                |
| d $\delta$ (ppm)                                                                   | Mult. (J) | Int. | Assignment                                                    |                                                   |                                                                |
| 1.49                                                                               | d (6.8)   | 6    | L <sub>2</sub> (CH <sub>3</sub> )                             |                                                   |                                                                |
| 1.53                                                                               | d (7.2)   | 6    | L <sub>1</sub> (CH <sub>3</sub> )                             |                                                   |                                                                |
| 3.48                                                                               | m         | 6    | Linker (CH <sub>2</sub> $\alpha$ -amide), L <sub>2</sub> (OH) |                                                   |                                                                |
| 4.23                                                                               | m         | 4    | Linker (CH <sub>2</sub> $\beta$ -amide)                       |                                                   |                                                                |
| 4.47                                                                               | q (26.4)  | 2    | L <sub>2</sub> (CH)                                           |                                                   |                                                                |
| 4.71                                                                               | d (16)    | 2    | G <sub>1</sub>                                                |                                                   |                                                                |
| 4.81                                                                               | d (16)    | 2    | G <sub>1</sub>                                                |                                                   |                                                                |
| 5.13                                                                               | q (21.2)  | 4    | L <sub>1</sub> (CH)                                           |                                                   |                                                                |
| 5.57                                                                               | t (11.6)  | 2    | Linker (amide)                                                |                                                   |                                                                |

AcOH (1.2 mL, 21 mmol, 16 eq) and TBAF (1 M in THF) (4.0 mL, 4.0 mmol, 3 eq) were dried over activated sieves for 2 h. **Si-LGL-Urea-LGL-Si** (1.038 mg, 1.33 mmol, 1 eq) was dissolved in dry THF (33 mL, 0.04 M) in a flame dried Schlenk flask under nitrogen. AcOH and TBAF were added dropwise at 0°C, allowed to warm to RT and stir for 30 h. The reaction mixture was then diluted with brine and extracted with EtOAc 3x, combined organic layers were washed with brine 3x, dried over MgSO<sub>4</sub>, concentrated and the crude oil was then purified via column chromatography (silica, EtOAc/hexanes) to yield a colorless oil (360 mg, 49% yield).



JHS-2078-Spot2; LGL-Urea-LGL; CDCl<sub>3</sub>; 1H;  
400a; 16 Scans; 8/19/16

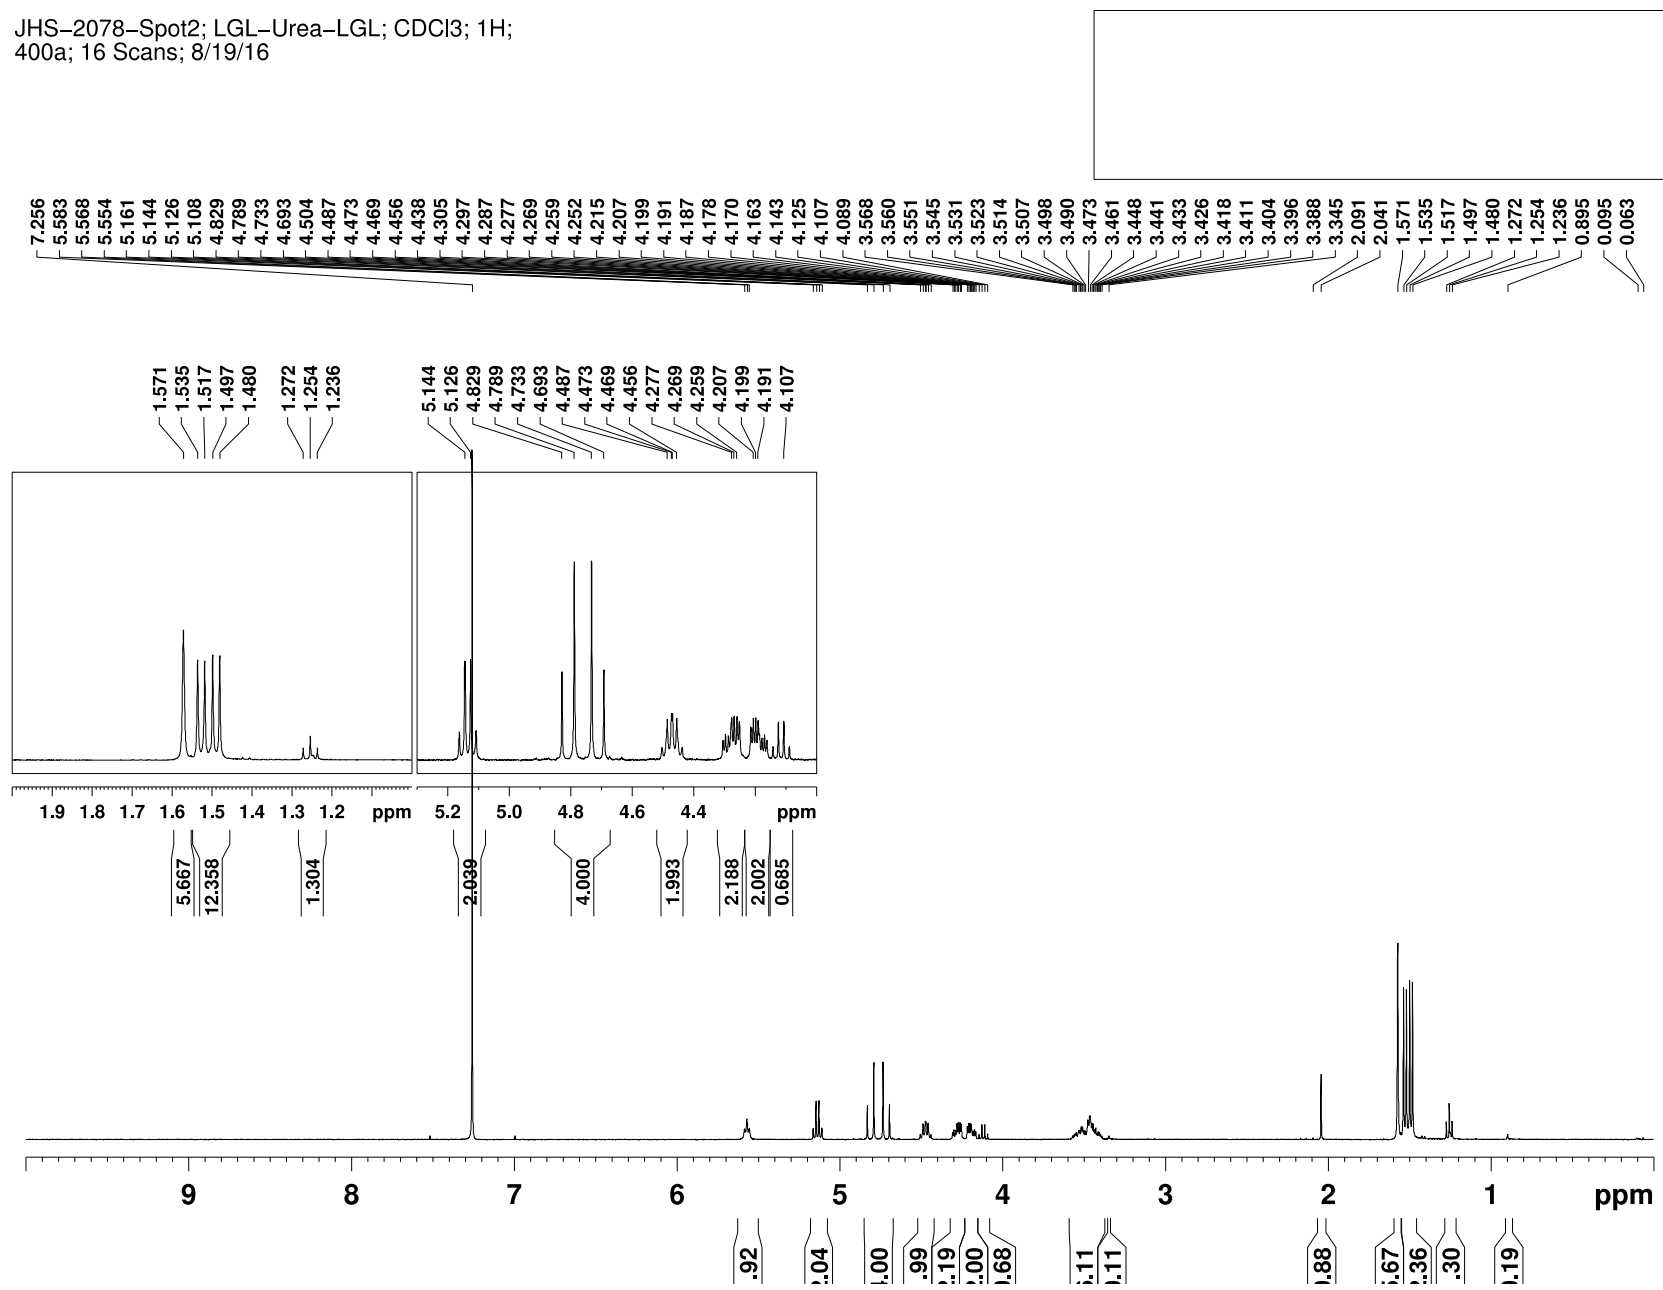

JHS-2078; LGL-Urea-LGL; CDCl<sub>3</sub>; 13C; 400a; \  
2048 Scans; 8/20/16

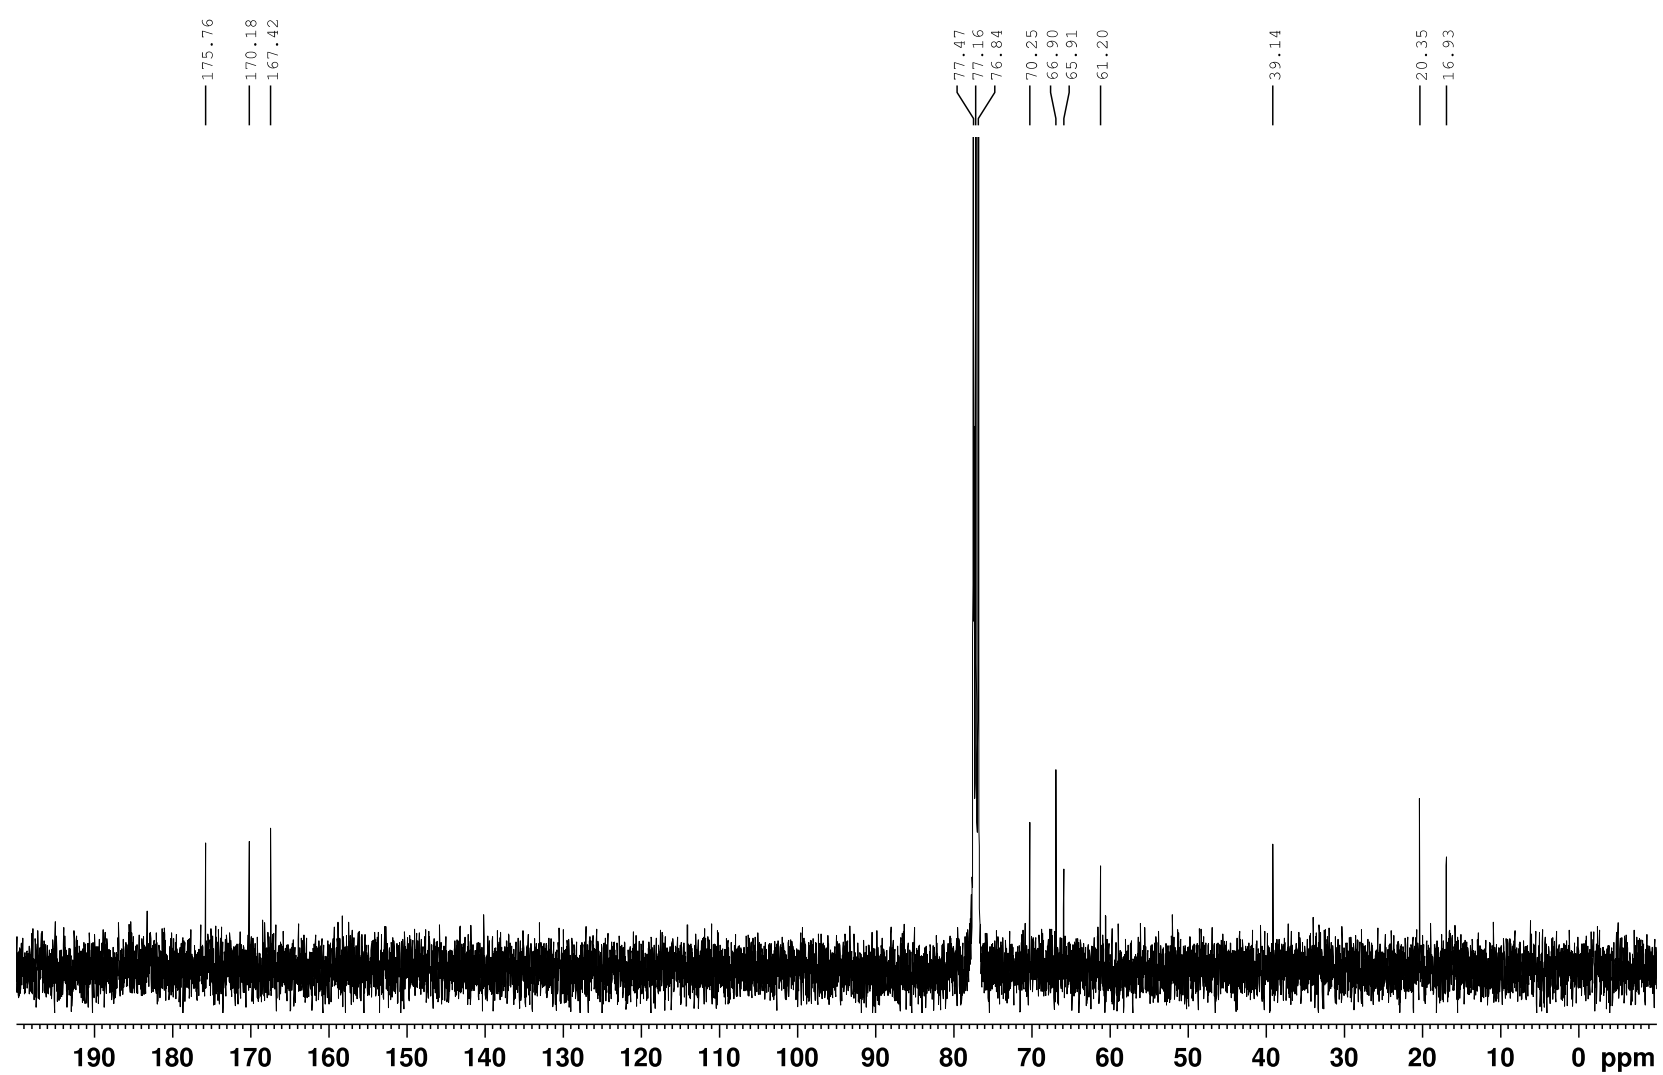

## BLGL-Urea-LGLB

|                                                                                    |           |      |                                                                                   | <sup>13</sup> C-NMR (400 MHz, CDCl <sub>3</sub> ) | HRMS (ESI)                                                     |
|------------------------------------------------------------------------------------|-----------|------|-----------------------------------------------------------------------------------|---------------------------------------------------|----------------------------------------------------------------|
| 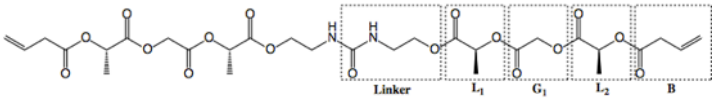 |           |      |                                                                                   | δ (ppm) + Assignment                              | <u>Calc. Mass</u>                                              |
|                                                                                    |           |      |                                                                                   | 16.82 L (CH <sub>3</sub> )                        | 688.23 amu                                                     |
|                                                                                    |           |      |                                                                                   | 16.87 L (CH <sub>3</sub> )                        |                                                                |
|                                                                                    |           |      |                                                                                   | 38.60 CH <sub>2</sub> (Linker)                    | <u>Calc.</u>                                                   |
|                                                                                    |           |      |                                                                                   | 39.08 CH <sub>2</sub> (Linker)                    | [M + H] <sup>+</sup>                                           |
|                                                                                    |           |      |                                                                                   | 60.47 CH <sub>2</sub>                             | 689.23 amu                                                     |
|                                                                                    |           |      |                                                                                   | 65.33 CH <sub>2</sub>                             |                                                                |
|                                                                                    |           |      |                                                                                   | 68.65 CH                                          | <u>Found</u>                                                   |
|                                                                                    |           |      |                                                                                   | 69.98 CH                                          | [M + H] <sup>+</sup>                                           |
|                                                                                    |           |      |                                                                                   | 119.20 B                                          | 689.23884                                                      |
|                                                                                    |           |      |                                                                                   | 129.48 B                                          | amu                                                            |
|                                                                                    |           |      |                                                                                   | 157.87 CO (Linker)                                |                                                                |
|                                                                                    |           |      |                                                                                   | 166.78 CO                                         | <u>Composition</u>                                             |
|                                                                                    |           |      |                                                                                   | 169.89 CO                                         | C <sub>29</sub> H <sub>41</sub> O <sub>17</sub> N <sub>2</sub> |
|                                                                                    |           |      |                                                                                   | 170.96 CO                                         |                                                                |
|                                                                                    |           |      |                                                                                   | 171.09 CO                                         |                                                                |
| <sup>1</sup> H-NMR (400 MHz, CDCl <sub>3</sub> )                                   |           |      |                                                                                   |                                                   |                                                                |
| dδ (ppm)                                                                           | Mult. (J) | Int. | Assignment                                                                        |                                                   |                                                                |
| 1.51                                                                               | d (6.8)   | 6    | L <sub>1</sub> (CH <sub>3</sub> )                                                 |                                                   |                                                                |
| 1.57                                                                               | d (7.2)   | 6    | L <sub>2</sub> (CH <sub>3</sub> )                                                 |                                                   |                                                                |
| 3.17                                                                               | m         | 4    | B (Terminal Olefin)                                                               |                                                   |                                                                |
| 3.44                                                                               | m         | 4    | Linker (CH <sub>2</sub> α-amide)                                                  |                                                   |                                                                |
| 4.22                                                                               | m         | 4    | Linker (CH <sub>2</sub> β-amide)                                                  |                                                   |                                                                |
| 4.73                                                                               | d (16)    | 2    | G1                                                                                |                                                   |                                                                |
| 4.78                                                                               | d (16)    | 2    | G1                                                                                |                                                   |                                                                |
| 5.14                                                                               | m         | 10   | L <sub>1</sub> (CH), L <sub>2</sub> (CH), B (CH <sub>2</sub> ),<br>Linker (amide) |                                                   |                                                                |
| 5.90                                                                               | m         | 2    | B (CH)                                                                            |                                                   |                                                                |

**LGL-Urea-LGL** (350 mg, 0.633 mmol, 1 eq) was dissolved in a 2:1 mixture of dry EtOAc:DCM (15 mL, 0.04 M) in an oven dried vial under nitrogen. DPTS (84 mg, 0.29 mmol, 0.45 eq) and DCC (0.39 g, 1.9 mmol, 3 eq) were added sequentially. Butenoic acid (0.167 g, 1.9 mmol, 3 eq) was then added dropwise and allowed to stir at RT overnight. Upon consumption of starting material by TLC, the reaction mixture was diluted with hexanes, washed with sodium bicarbonate 3x, dried over MgSO<sub>4</sub> and filtered to remove DCU and drying agent, concentrated, and crude oil was purified via column chromatography (silica, EtOAc/hexanes) to yield a colorless oil (307 mg, 70% yield).

JHS-2079; BLGL-Urea-LGLB; CDCl<sub>3</sub>; 1H; 400a;  
16 Scans; 8/22/16

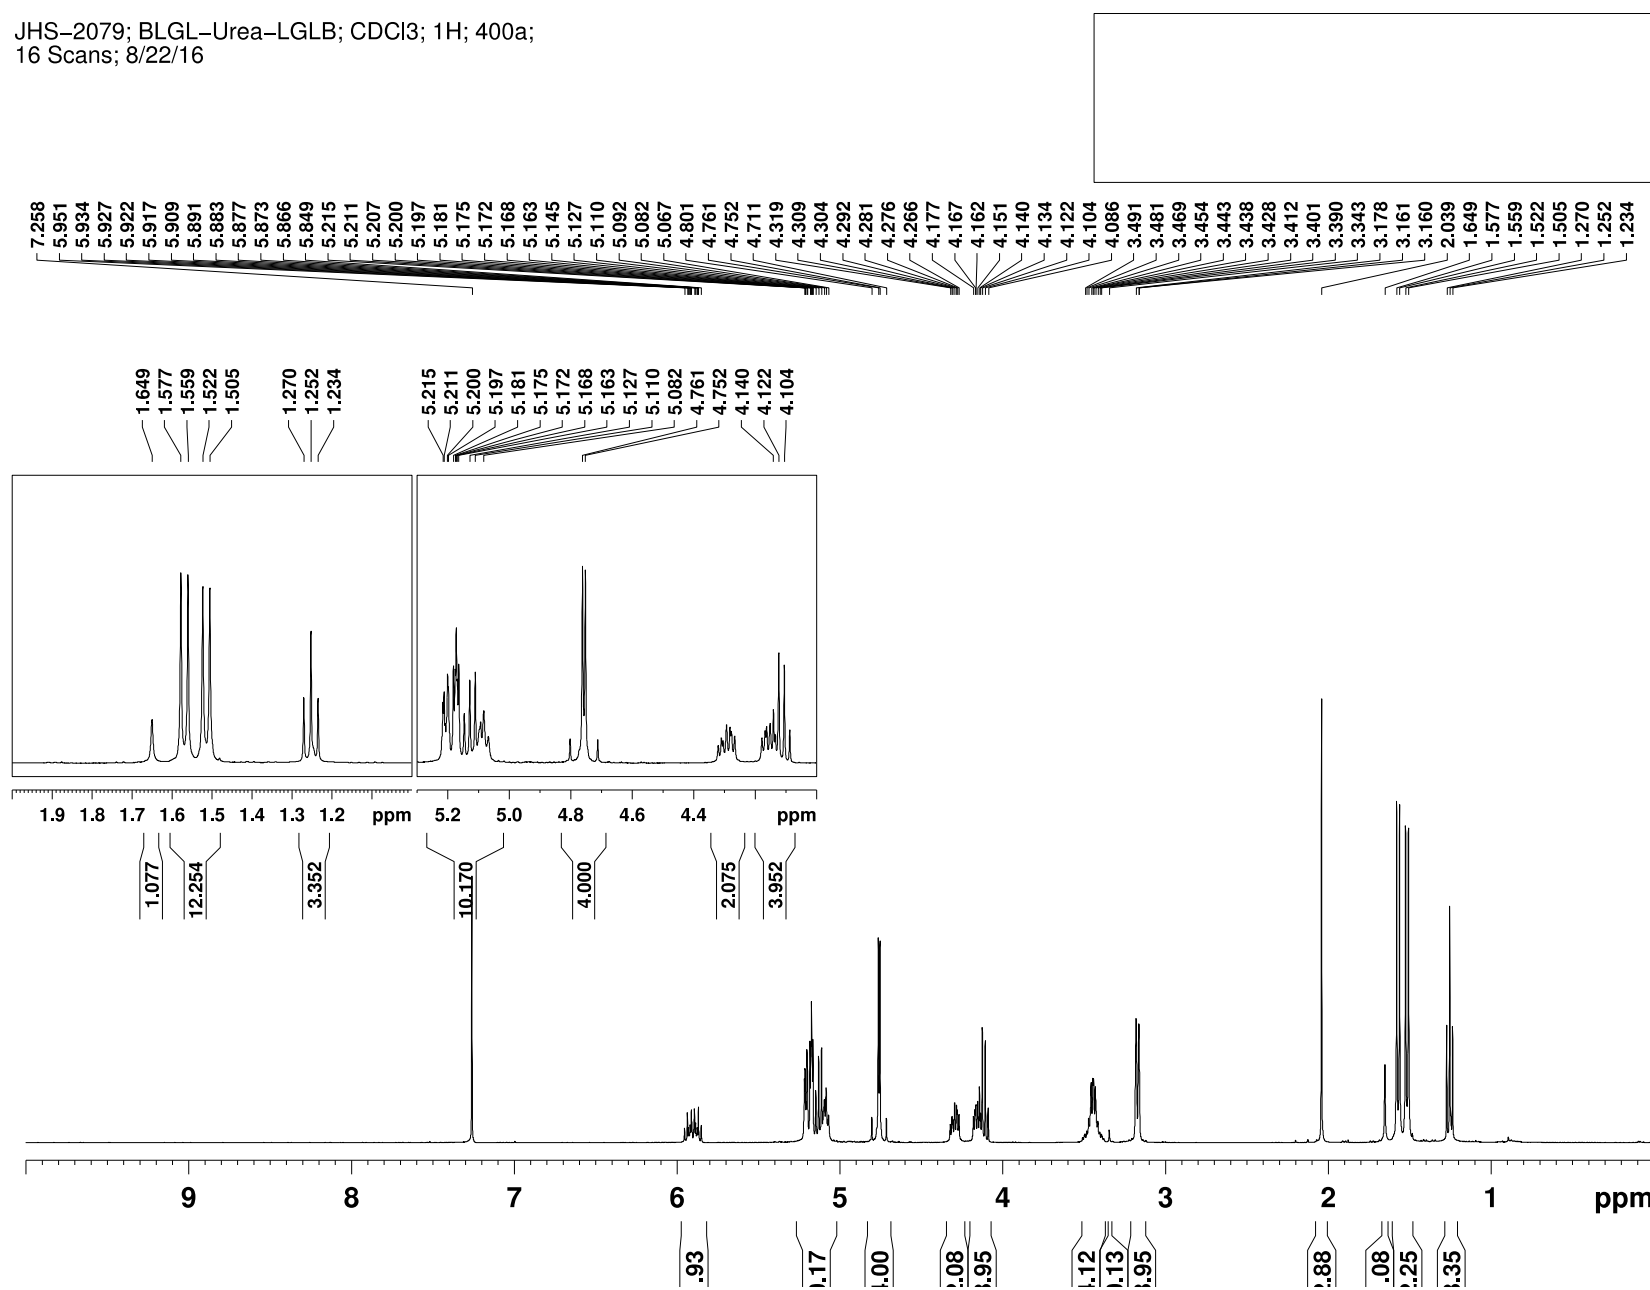

JHS-2079; BLGL-Urea-LGLB; CDCl<sub>3</sub>; 13c; 400a;  
2048 Scans; 8/22/16

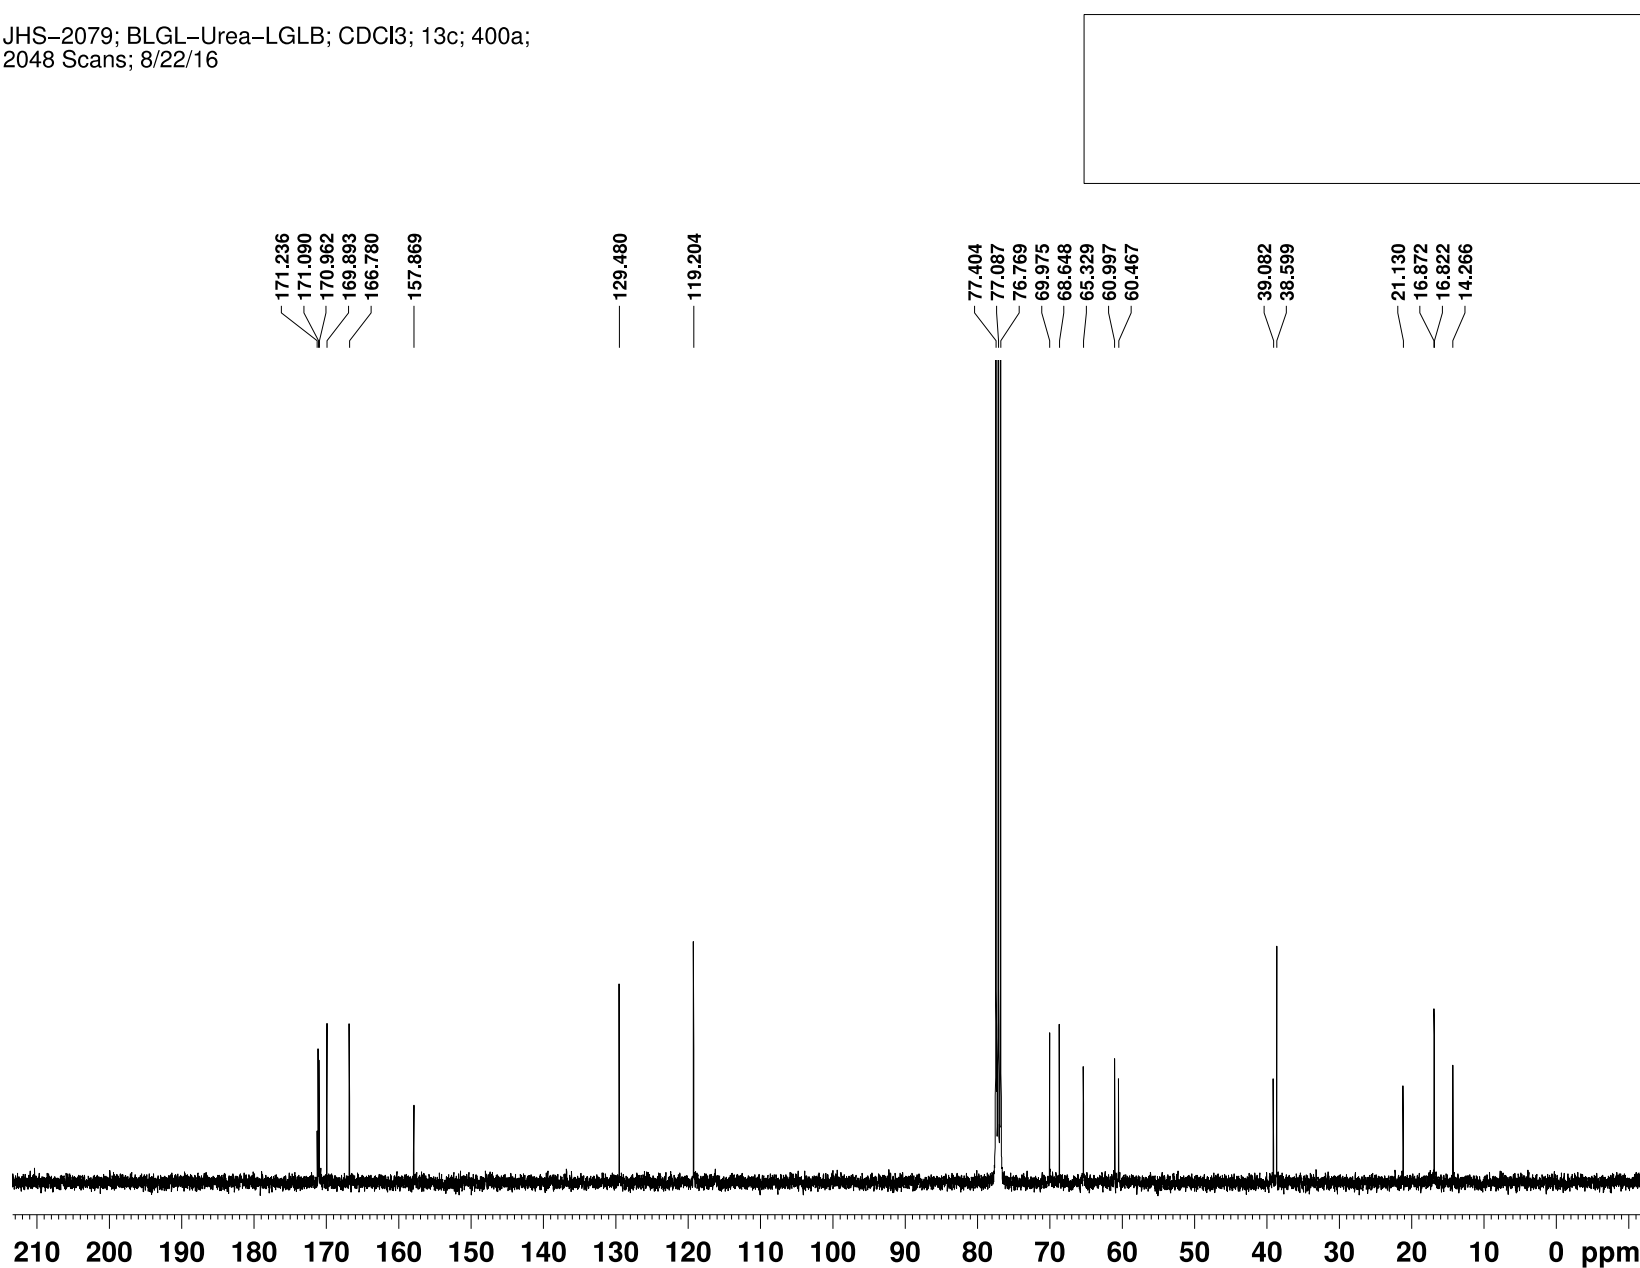

| Cyclic Urea Monomer                                                               |           |      |                                          | <sup>13</sup> C-NMR (400 MHz, CDCl <sub>3</sub> ) | HRMS (ESI)                                                     |
|-----------------------------------------------------------------------------------|-----------|------|------------------------------------------|---------------------------------------------------|----------------------------------------------------------------|
| 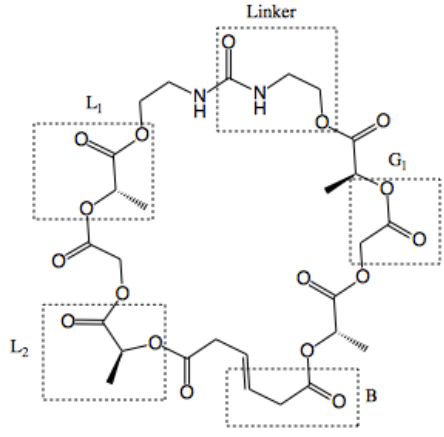 |           |      |                                          | $\delta$ (ppm) + Assignment                       | <u>Calc. Mass</u>                                              |
|                                                                                   |           |      |                                          | 16.86 L (CH <sub>3</sub> )                        | 660.20 amu                                                     |
|                                                                                   |           |      |                                          | 16.91 L (CH <sub>3</sub> )                        |                                                                |
|                                                                                   |           |      |                                          | 37.62 CH <sub>2</sub> (Linker)                    | <u>Calc.</u>                                                   |
|                                                                                   |           |      |                                          | 39.14 CH <sub>2</sub> (Linker)                    | [M + H] <sup>+</sup>                                           |
|                                                                                   |           |      |                                          | 61.21 CH <sub>2</sub>                             | 661.20 amu                                                     |
|                                                                                   |           |      |                                          | 65.54 CH <sub>2</sub>                             |                                                                |
|                                                                                   |           |      |                                          | 68.83 CH                                          | <u>Found</u>                                                   |
|                                                                                   |           |      |                                          | 70.19 CH                                          | [M + H] <sup>+</sup>                                           |
|                                                                                   |           |      |                                          | 124.73 B (cis)                                    | 661.20786 amu                                                  |
|                                                                                   |           |      |                                          | 125.86 B (trans)                                  |                                                                |
|                                                                                   |           |      |                                          | 157.98 CO (Linker)                                | <u>Composition</u>                                             |
|                                                                                   |           |      |                                          | 166.82 CO                                         | C <sub>27</sub> H <sub>36</sub> O <sub>17</sub> N <sub>2</sub> |
|                                                                                   |           |      |                                          | 170.60 CO                                         |                                                                |
|                                                                                   |           |      |                                          | 170.86 CO                                         |                                                                |
|                                                                                   |           |      |                                          | 171.54 CO                                         |                                                                |
| <sup>1</sup> H-NMR (400 MHz, CDCl <sub>3</sub> )                                  |           |      |                                          |                                                   |                                                                |
| d $\delta$ (ppm)                                                                  | Mult. (J) | Int. | Assignment                               |                                                   |                                                                |
| 1.52                                                                              | d (7.2)   | 6    | L <sub>1</sub> (CH <sub>3</sub> )        |                                                   |                                                                |
| 1.56                                                                              | d (6.8)   | 6    | L <sub>2</sub> (CH <sub>3</sub> )        |                                                   |                                                                |
| 3.16                                                                              | m         | 4    | B (CH <sub>2</sub> )                     |                                                   |                                                                |
| 3.45                                                                              | m         | 4    | Linker (CH <sub>2</sub> $\alpha$ -amide) |                                                   |                                                                |
| 4.23                                                                              | m         | 4    | Linker (CH <sub>2</sub> $\beta$ -amide)  |                                                   |                                                                |
| 4.69                                                                              | d (16)    | 2    | G1                                       |                                                   |                                                                |
| 4.79                                                                              | d (16)    | 2    | G1                                       |                                                   |                                                                |
| 5.09                                                                              | q (21)    | 2    | L <sub>1</sub> (CH)                      |                                                   |                                                                |
| 5.22                                                                              | m         | 4    | L <sub>2</sub> (CH), Linker (amide)      |                                                   |                                                                |
| 5.77                                                                              | m         | 2    | B (olefin)                               |                                                   |                                                                |

**BLGL-Urea-LGLB** (300 mg, 0.44 mmol, 1 eq) was dissolved in dry DCM (435 mL, 0.001M) in a flame-dried Schlenk flask under nitrogen. A stock solution of Grubbs 2 (37 mg, 0.044 mmol, 10 mol%) in dry DCM was added and allowed to stir at RT overnight. Upon consumption of starting material by TLC, reaction mixture was quenched by addition of excess ethyl vinyl ether and stirring for 10 additional min. The reaction mixture was then concentrated and the crude solid was purified via column chromatography (silica, EtOAc/hexanes) to yield a thick brown oil (252 mg, 87% yield).

JHS-2080; Urea Monomer; CDCl<sub>3</sub>; 1H; 400a;  
16 Scans; 8/23/16

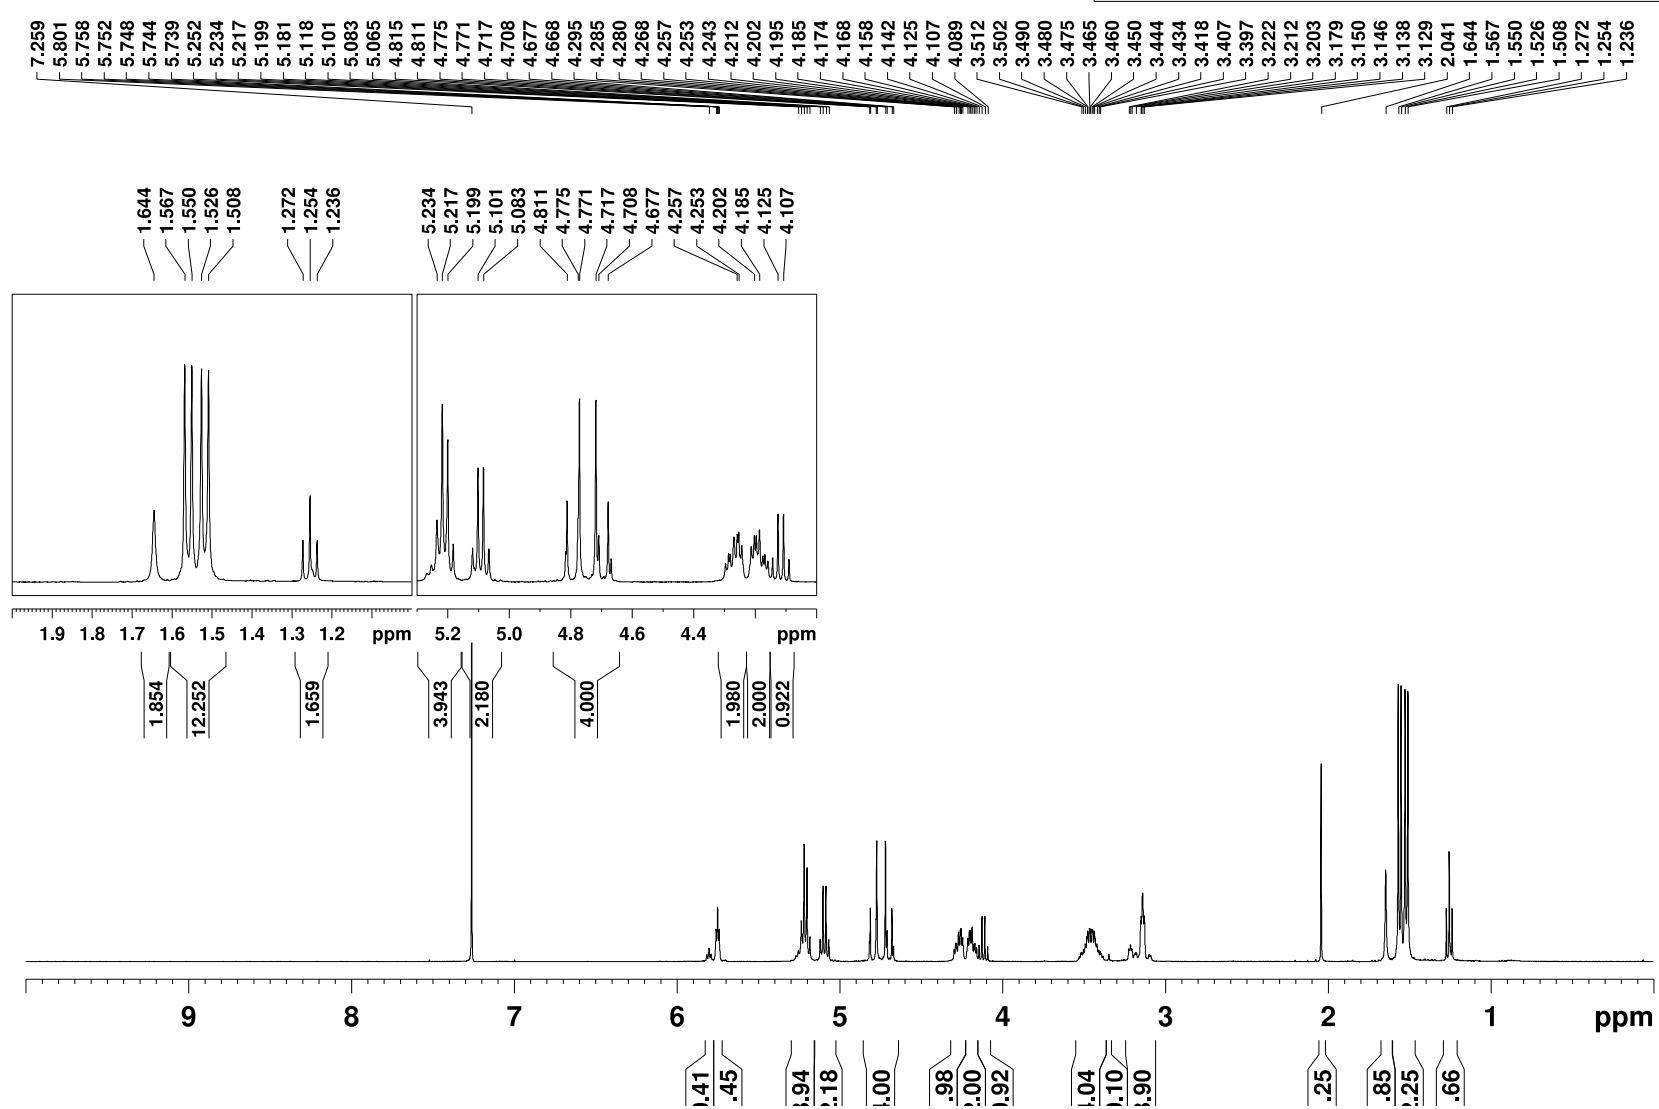

JHS-2080; Urea Monomer; CDCl<sub>3</sub>; 13c; 400a;  
2048 Scans; 8/23/16

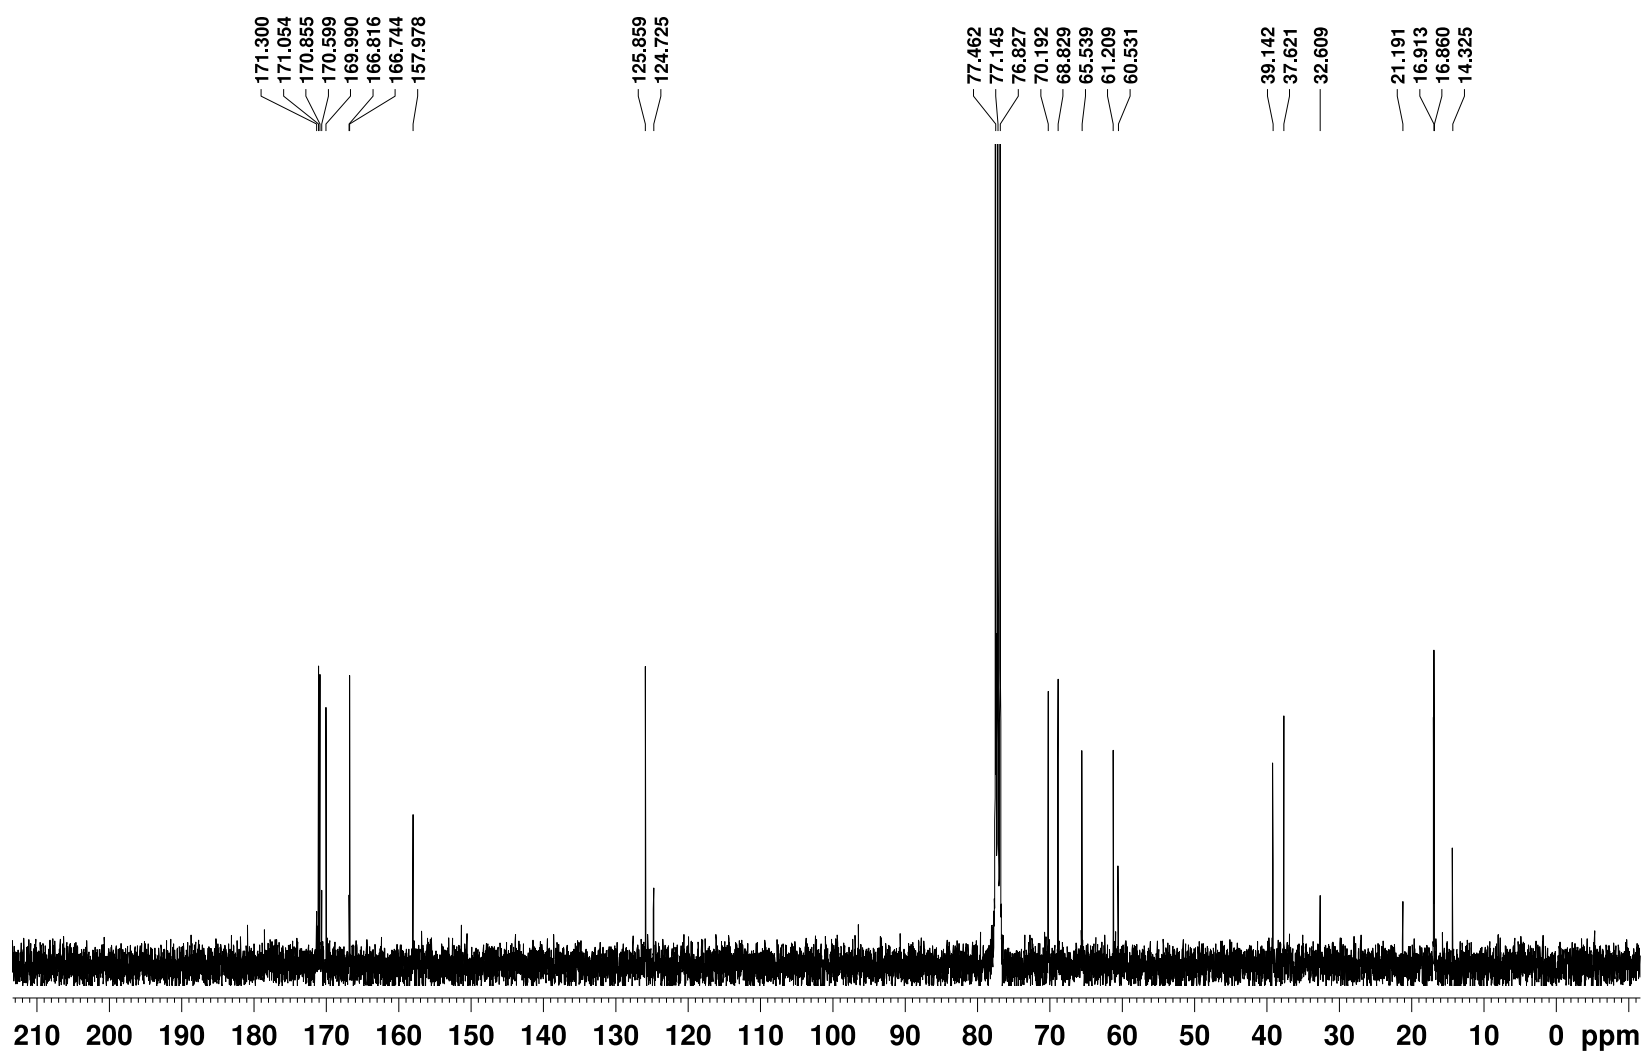

| <b>Poly(Urea)</b>                                                                  |           |      |                                               | <sup>13</sup> C-NMR (500 MHz, CDCl <sub>3</sub> ) |                                   | HRMS (ESI)           |
|------------------------------------------------------------------------------------|-----------|------|-----------------------------------------------|---------------------------------------------------|-----------------------------------|----------------------|
| 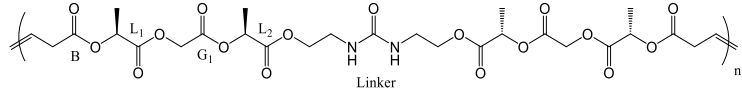 |           |      |                                               | δ (ppm) + Assignment                              |                                   | <u>M<sub>n</sub></u> |
|                                                                                    |           |      |                                               | 16.86                                             | CH <sub>3</sub> (L)               | 26,596 Da            |
|                                                                                    |           |      |                                               | 16.91                                             | CH <sub>3</sub> (L)               |                      |
|                                                                                    |           |      |                                               | 37.34                                             | CH <sub>2</sub> (Linker)          | <u>D</u><br>1.38     |
|                                                                                    |           |      |                                               | 39.16                                             | CH <sub>2</sub> (Linker)          |                      |
|                                                                                    |           |      |                                               | 61.05                                             | CH <sub>2</sub> (G <sub>1</sub> ) |                      |
|                                                                                    |           |      |                                               | 65.25                                             | CH <sub>2</sub> (B)               |                      |
|                                                                                    |           |      |                                               | 68.74                                             | CH (L)                            |                      |
|                                                                                    |           |      |                                               | 69.97                                             | CH (L)                            |                      |
|                                                                                    |           |      |                                               | 124.41                                            | CH (B Cis)                        |                      |
|                                                                                    |           |      |                                               | 125.81                                            | CH (B Trans)                      |                      |
|                                                                                    |           |      |                                               | 158.04                                            | CO                                |                      |
|                                                                                    |           |      |                                               | 166.85                                            | CO                                |                      |
|                                                                                    |           |      |                                               | 169.95                                            | CO                                |                      |
|                                                                                    |           |      |                                               | 170.85                                            | CO                                |                      |
|                                                                                    |           |      |                                               | 170.96                                            | CO                                |                      |
| <sup>1</sup> H-NMR (400 MHz, CDCl <sub>3</sub> )                                   |           |      |                                               |                                                   |                                   |                      |
| δ (ppm)                                                                            | Mult. (J) | Int. | Assignment                                    |                                                   |                                   |                      |
| 1.51                                                                               | d (6.8)   | 6    | L <sub>1</sub> CH <sub>3</sub>                |                                                   |                                   |                      |
| 1.56                                                                               | d (6.8)   | 6    | L <sub>2</sub> CH <sub>3</sub>                |                                                   |                                   |                      |
| 3.17                                                                               | m         | 4    | B Terminal CH <sub>2</sub>                    |                                                   |                                   |                      |
| 3.43                                                                               | m         | 4    | Linker CH <sub>2</sub>                        |                                                   |                                   |                      |
| 4.16                                                                               | m         | 2    | Linker CH <sub>2</sub>                        |                                                   |                                   |                      |
| 4.27                                                                               | m         | 2    | Linker CH <sub>2</sub>                        |                                                   |                                   |                      |
| 4.29                                                                               | m         | 4    | Linker CH <sub>2</sub> β to S                 |                                                   |                                   |                      |
| 4.73                                                                               | d (16)    | 2    | G <sub>1</sub>                                |                                                   |                                   |                      |
| 4.79                                                                               | d (16)    | 2    | G <sub>1</sub>                                |                                                   |                                   |                      |
| 5.15                                                                               | m         | 6    | L <sub>1</sub> & L <sub>2</sub> CH, Linker NH |                                                   |                                   |                      |
| 5.75                                                                               | m         | 2    | B CH Trans                                    |                                                   |                                   |                      |

**Cyclic Urea Monomer** (78 mg, 0.118 mmol, 1 eq.) was weighed in a flame dried 1 mL vial under nitrogen. A stock solution of Grubbs II (1 mg, 0.0012 mmol, 3 mol%) in dry DCM (5.8 mg/mL, 0.17 mL, 0.7M) was added and the vial was shaken for 4 h. The reaction mixture was quenched by the addition of excess ethyl vinyl ether and vortexing. Solution was concentrated to yield a crude solid polymer, which was reprecipitated into a stirring solution of MeOH and filtered to collect pure polymer as a brown solid (34 mg, 44% yield).

JHS-3043-Pure; Poly(Urea); CDCl<sub>3</sub>; 1H; 400a;  
16 Scans; 2/28/17

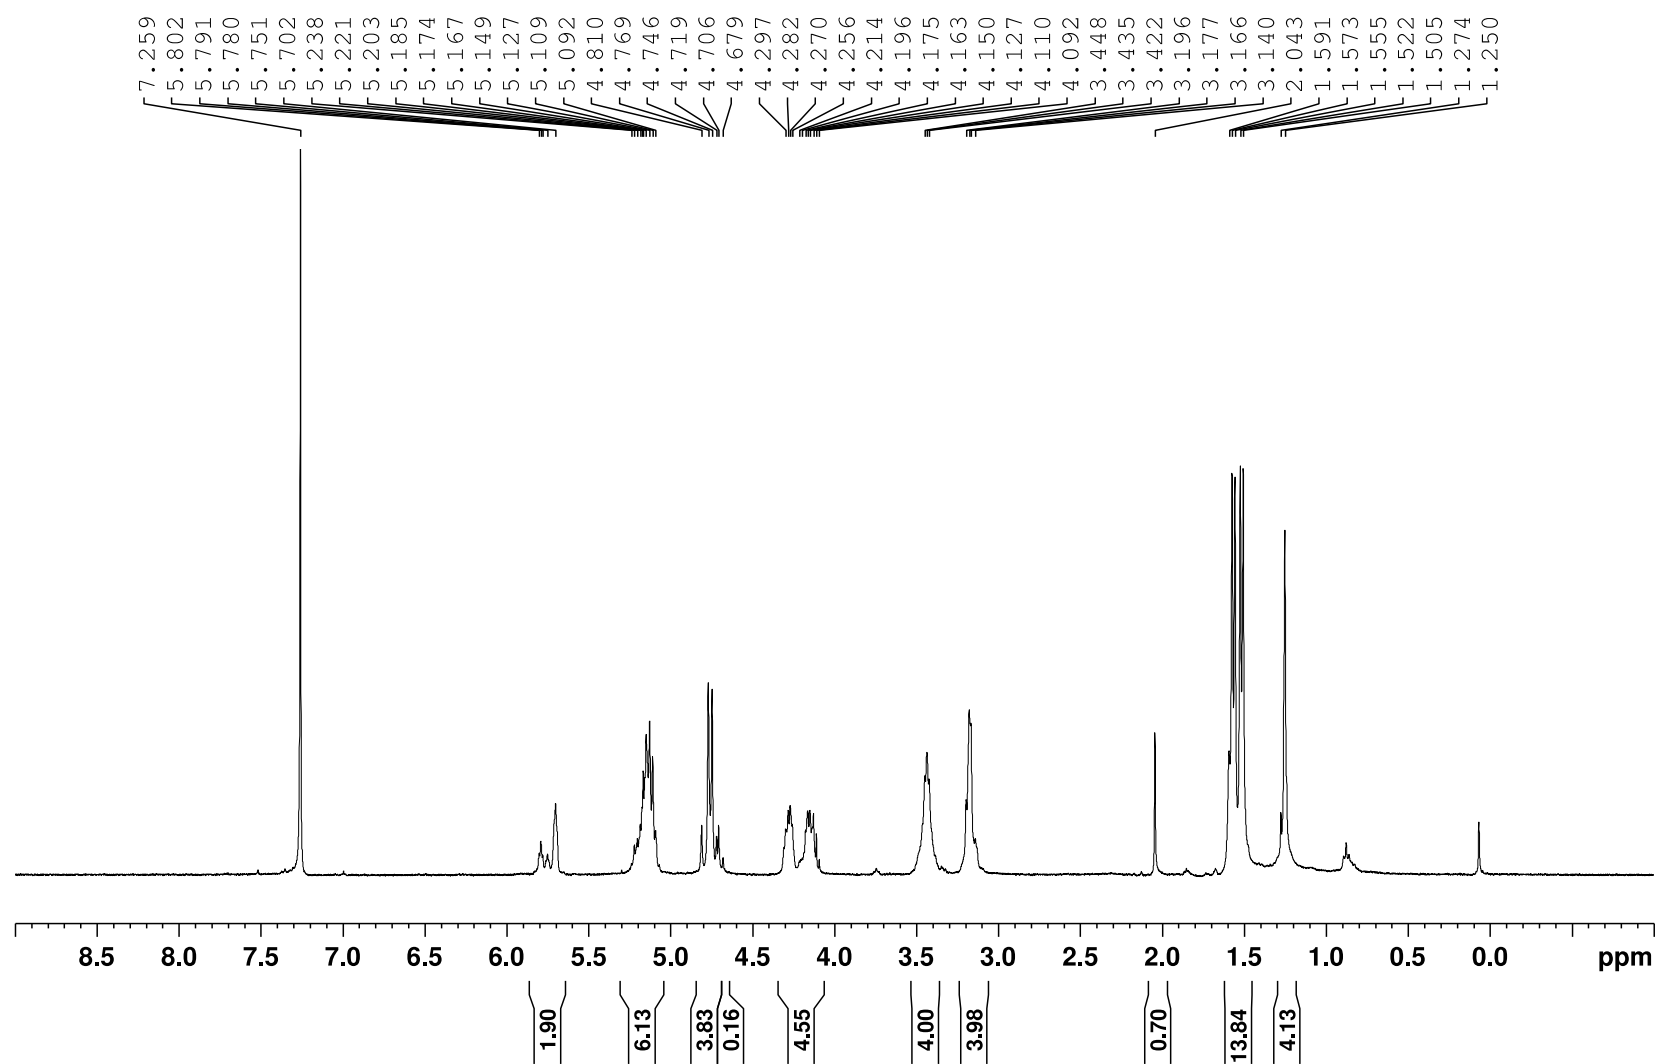

JHS-3043-500; Poly(Urea); CDCl<sub>3</sub>; 13C; 500;  
256 Scans; 10/27/17

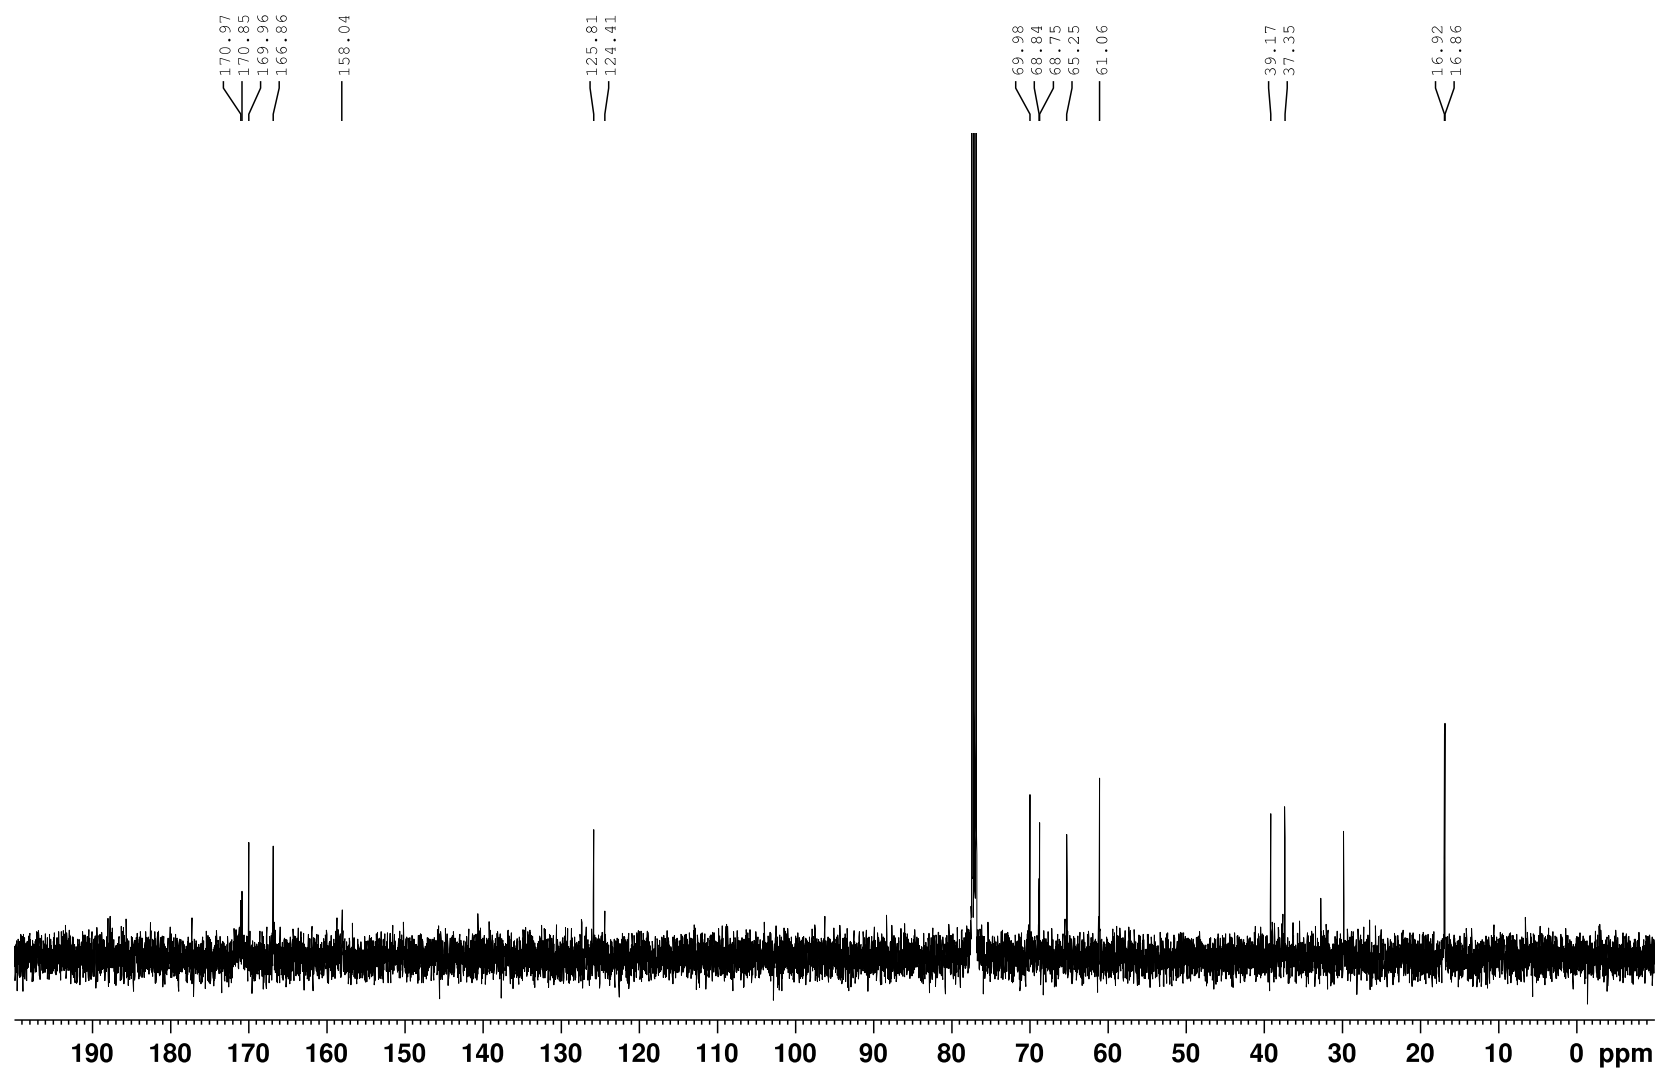

## 2.7 TRIAZOLE LINKER CONTAINING COMPOUNDS AND PRECURSORS

| 2-Azidoethanol                                                                    |               |      |                                                                           |                                                                                                                 |
|-----------------------------------------------------------------------------------|---------------|------|---------------------------------------------------------------------------|-----------------------------------------------------------------------------------------------------------------|
| 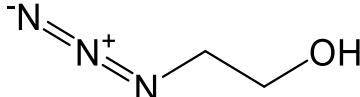 |               |      | <sup>13</sup> C-NMR (400 MHz, CDCl <sub>3</sub> )                         | HRMS (ESI)                                                                                                      |
|                                                                                   |               |      | δ (ppm) +<br>Assignment<br>53.66 CH <sub>2</sub><br>61.66 CH <sub>2</sub> | Calc. Mass<br>87.04 amu<br><br>Calc.<br>[M + H] <sup>+</sup><br>88.04 amu                                       |
| <sup>1</sup> H-NMR (400 MHz, CDCl <sub>3</sub> )                                  |               |      |                                                                           |                                                                                                                 |
| dδ (ppm)                                                                          | Mult. (J Hz)  | Int. | Assignment                                                                | Found<br>[M + H] <sup>+</sup><br>88.04 amu<br><br>Composition<br>C <sub>2</sub> H <sub>5</sub> N <sub>3</sub> O |
| 1.90                                                                              | t (5.75)      | 1    | OH                                                                        |                                                                                                                 |
| 3.45                                                                              | t (4.9)       | 2    | CH <sub>2</sub> (α to azide)                                              |                                                                                                                 |
| 3.78                                                                              | m (4.9, 5.75) | 2    | CH <sub>2</sub> (α to alcohol)                                            |                                                                                                                 |

Bromoethanol (3 g, 24 mmol, 1 eq) was dissolved in DI water (30 mL, 0.8 M) in a round bottom flask fitted with a condenser and heated to 80°C. Sodium azide (4.7 g, 72 mmol, 3 eq) was added and allowed to stir overnight at 80°C. After 20 h, reaction mixture was extracted with EtOAc 3x and the combined organic layers were dried over MgSO<sub>4</sub> and concentrated to yield an orange liquid (1.05 g, 50%).



JHS-2062; 2-Azidoethanol; CDCl<sub>3</sub>; 1H; 400a; 16 Scans; 7/2/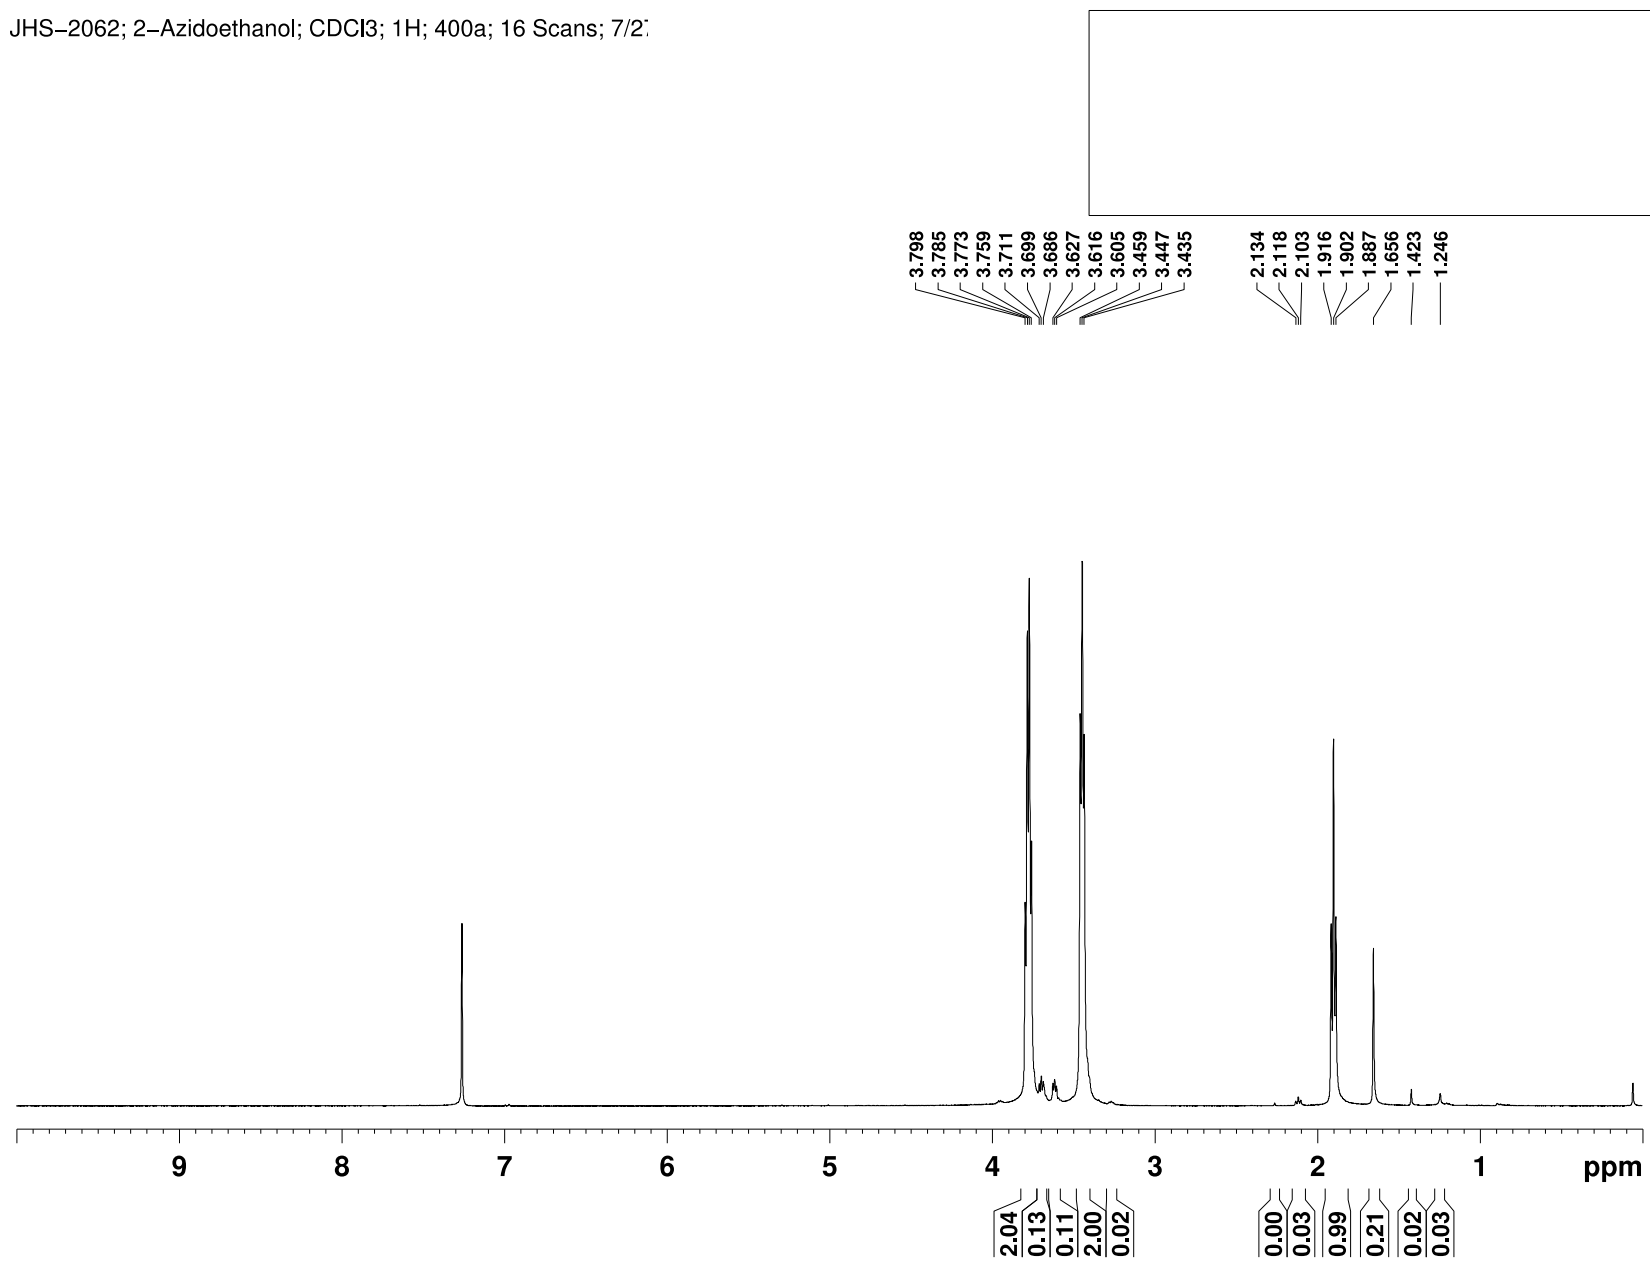JHS-2062; 2-Azidoethanol; CDCl<sub>3</sub>; 13C; 400a; 1024 Scans; 7/27/16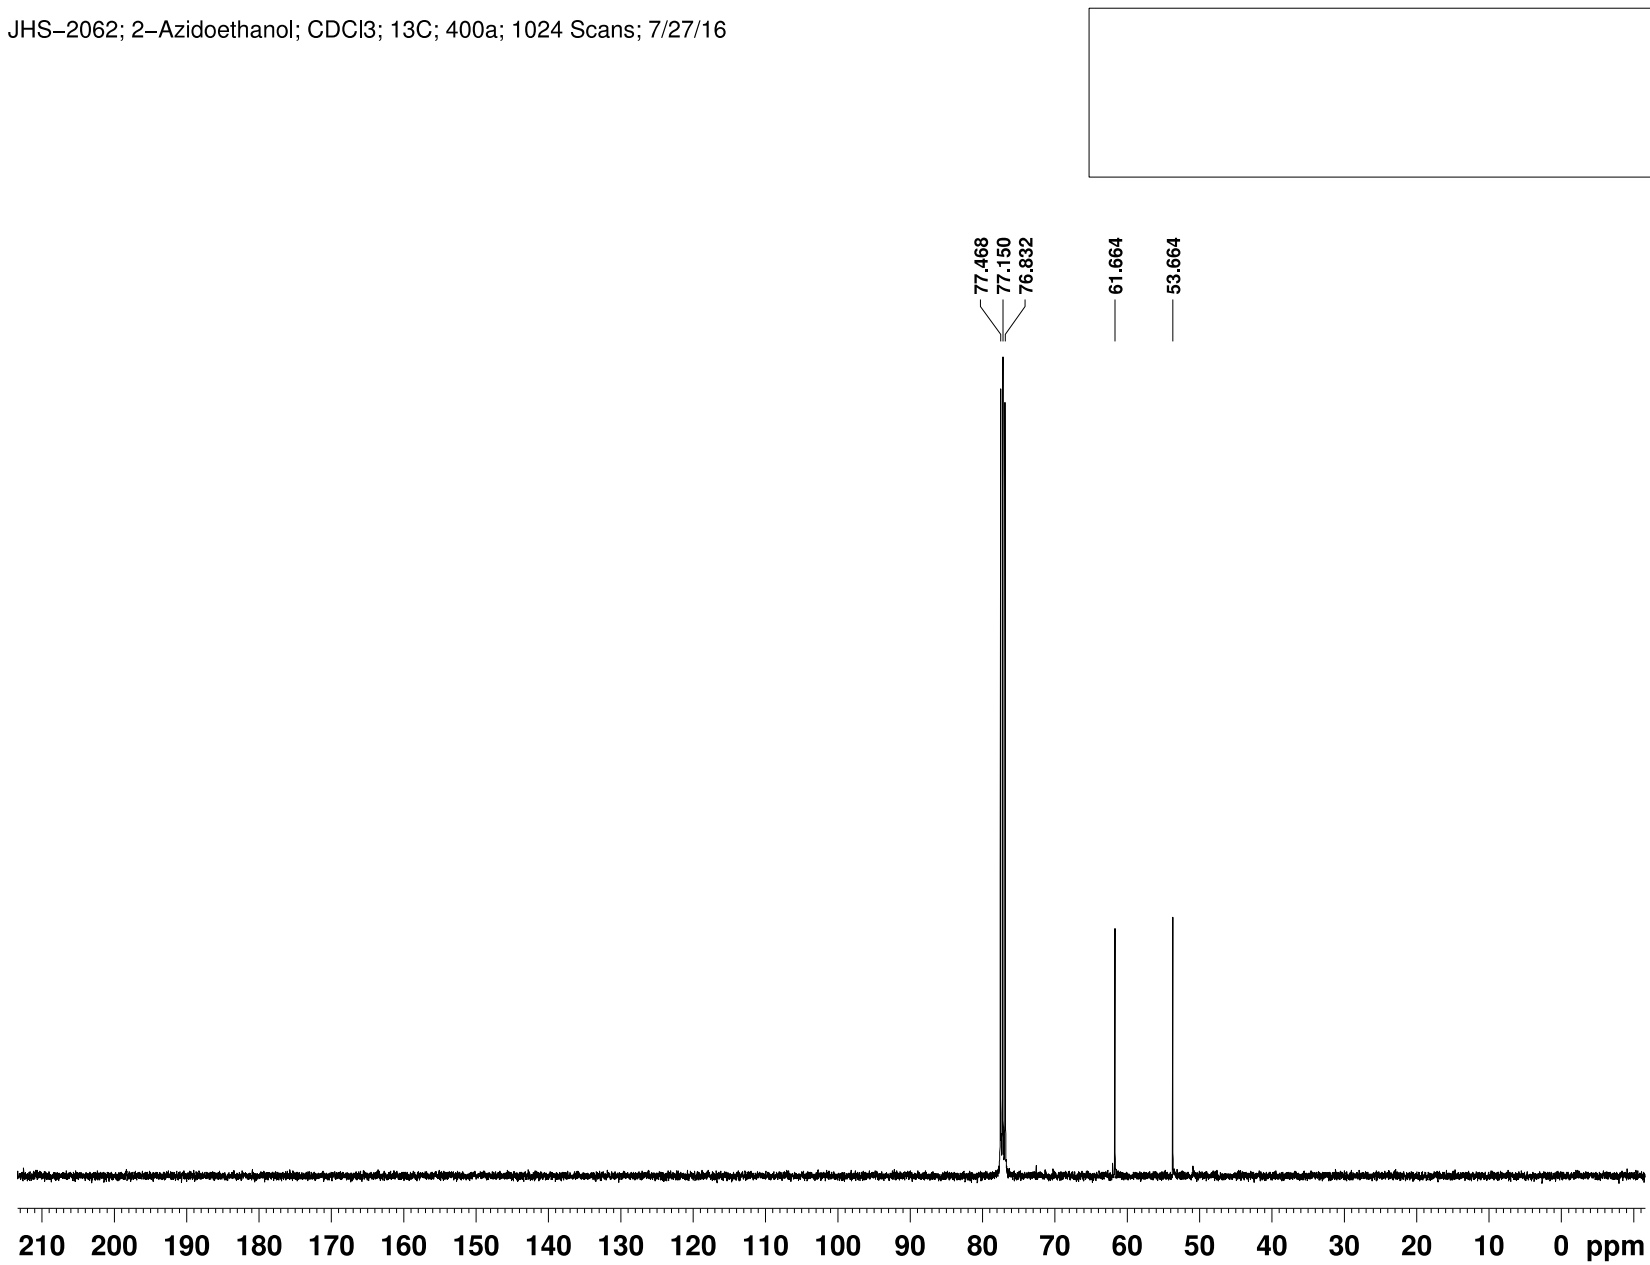

| Triazole Diol                                                                     |              |      |                                | <sup>13</sup> C-NMR (400 MHz, DMSO)                                                                                                | HRMS (ESI)                                                                         |
|-----------------------------------------------------------------------------------|--------------|------|--------------------------------|------------------------------------------------------------------------------------------------------------------------------------|------------------------------------------------------------------------------------|
| 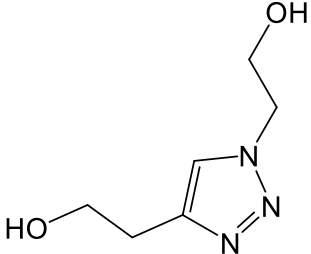 |              |      |                                | δ (ppm) +<br>Assignment                                                                                                            | <u>Calc. Mass</u><br>157.09 amu                                                    |
|                                                                                   |              |      |                                | 28.93 CH <sub>2</sub><br>51.72 CH <sub>2</sub><br>59.66 CH <sub>2</sub><br>60.18 CH <sub>2</sub><br>122.54 Alkene<br>143.83 Alkene | <u>Calc.</u><br>[M + H] <sup>+</sup><br>158.09 amu                                 |
| <sup>1</sup> H-NMR (400 MHz, MeOD)                                                |              |      |                                |                                                                                                                                    |                                                                                    |
| dδ (ppm)                                                                          | Mult. (J Hz) | Int. | Assignment                     |                                                                                                                                    |                                                                                    |
| 2.75                                                                              | t (6.6)      | 2    | CH <sub>2</sub> (α to alkene)  |                                                                                                                                    | <u>Found</u><br>[M + H] <sup>+</sup><br>158.09176<br>amu                           |
| 3.62                                                                              | t (6.6)      | 2    | CH <sub>2</sub> (α to alcohol) |                                                                                                                                    |                                                                                    |
| 3.74                                                                              | t (5.2)      | 2    | CH <sub>2</sub> (α to alcohol) |                                                                                                                                    |                                                                                    |
| 4.33                                                                              | t (5.2)      | 2    | CH <sub>2</sub> (α to N)       |                                                                                                                                    |                                                                                    |
| 7.81                                                                              | s            | 1    | CH (Alkene)                    |                                                                                                                                    | <u>Composition</u><br>C <sub>6</sub> H <sub>11</sub> N <sub>3</sub> O <sub>2</sub> |

Copper iodide (23 mg, 0.12 mmol, 0.01 eq), AcOH (14 μL, 0.24 mmol, 0.02 eq), diisopropylethylamine (42 μL, 0.24 mmol, 0.02 eq), 2-azidoethanol (1.08 g, 12.4 mmol, 1.05 eq) and 3-butyn-1-ol (0.826 g, 11.8 mmol, 1 eq) were added to a vial sequentially and allowed to stir for 10 min. Upon consumption of starting material by TLC, the reaction mixture turned dark brown and viscous, and was then run through a plug of silica with methanol and concentrated to yield a yellow oil (1.1 g, 60% yield).

JHS-2082; TZ Diol; DMSO; 1H; 400a; 16 Scans;  
8/24/16

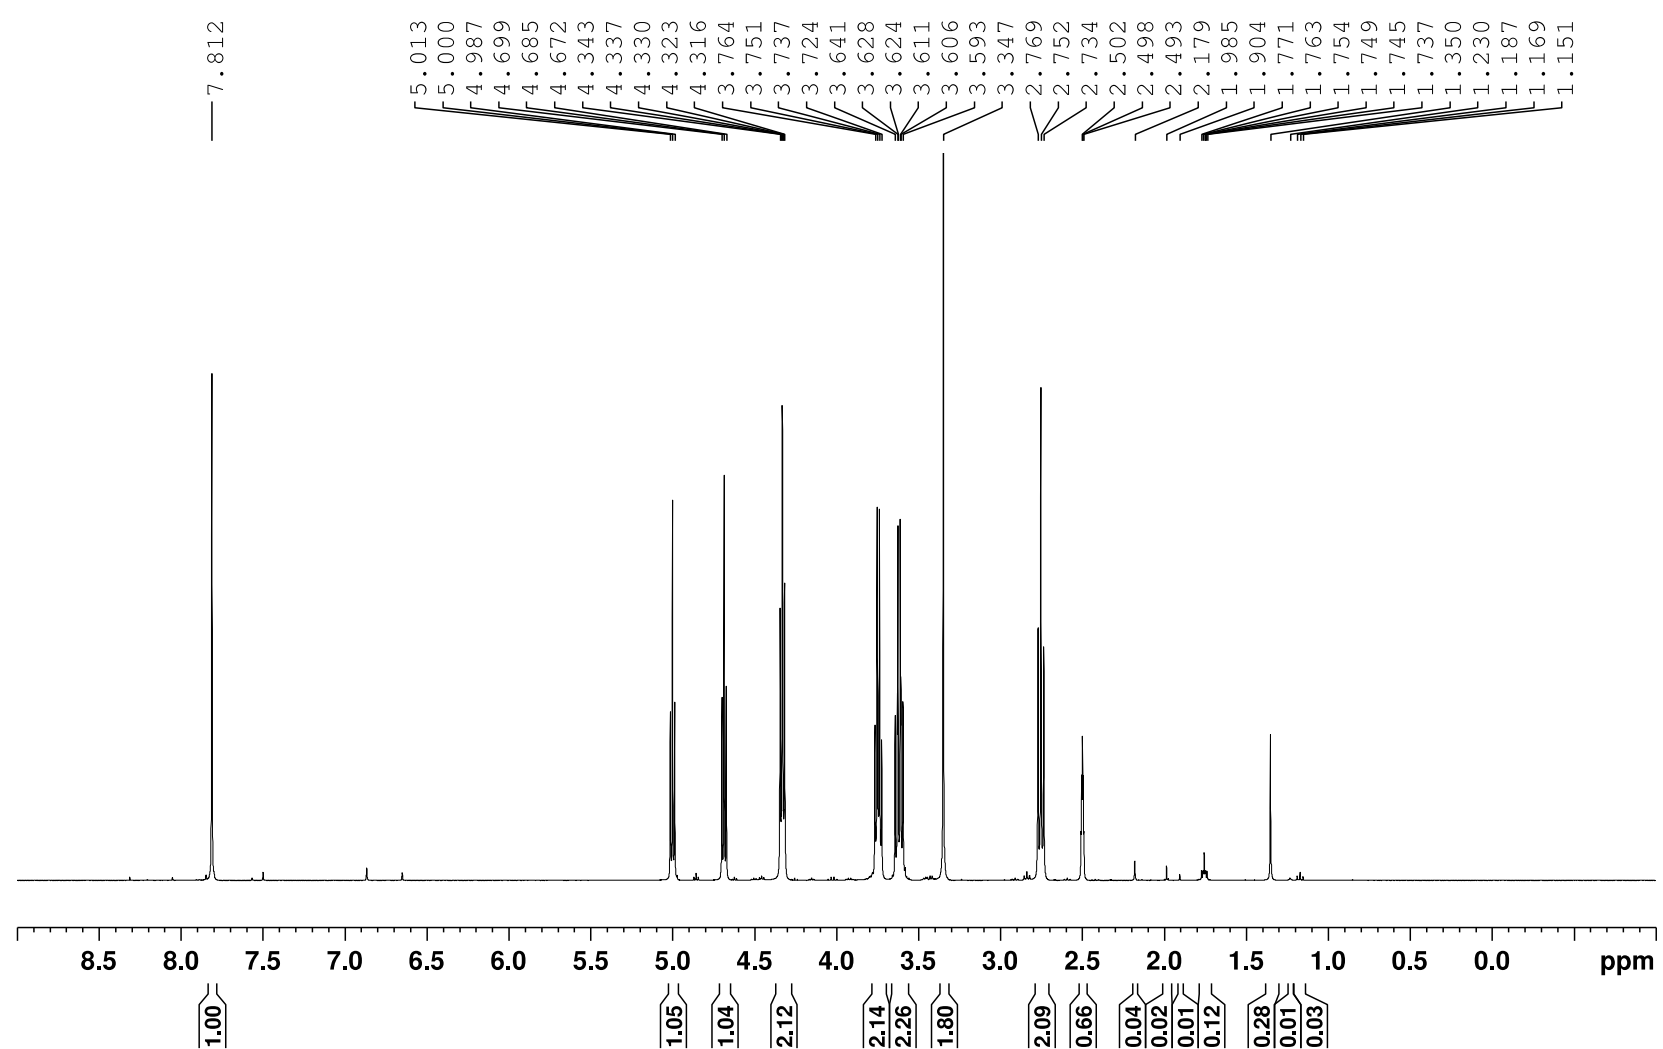

JHS-2082; TZ Diol; DMSO; 13C; 400a; 2048 Scans  
8/24/16

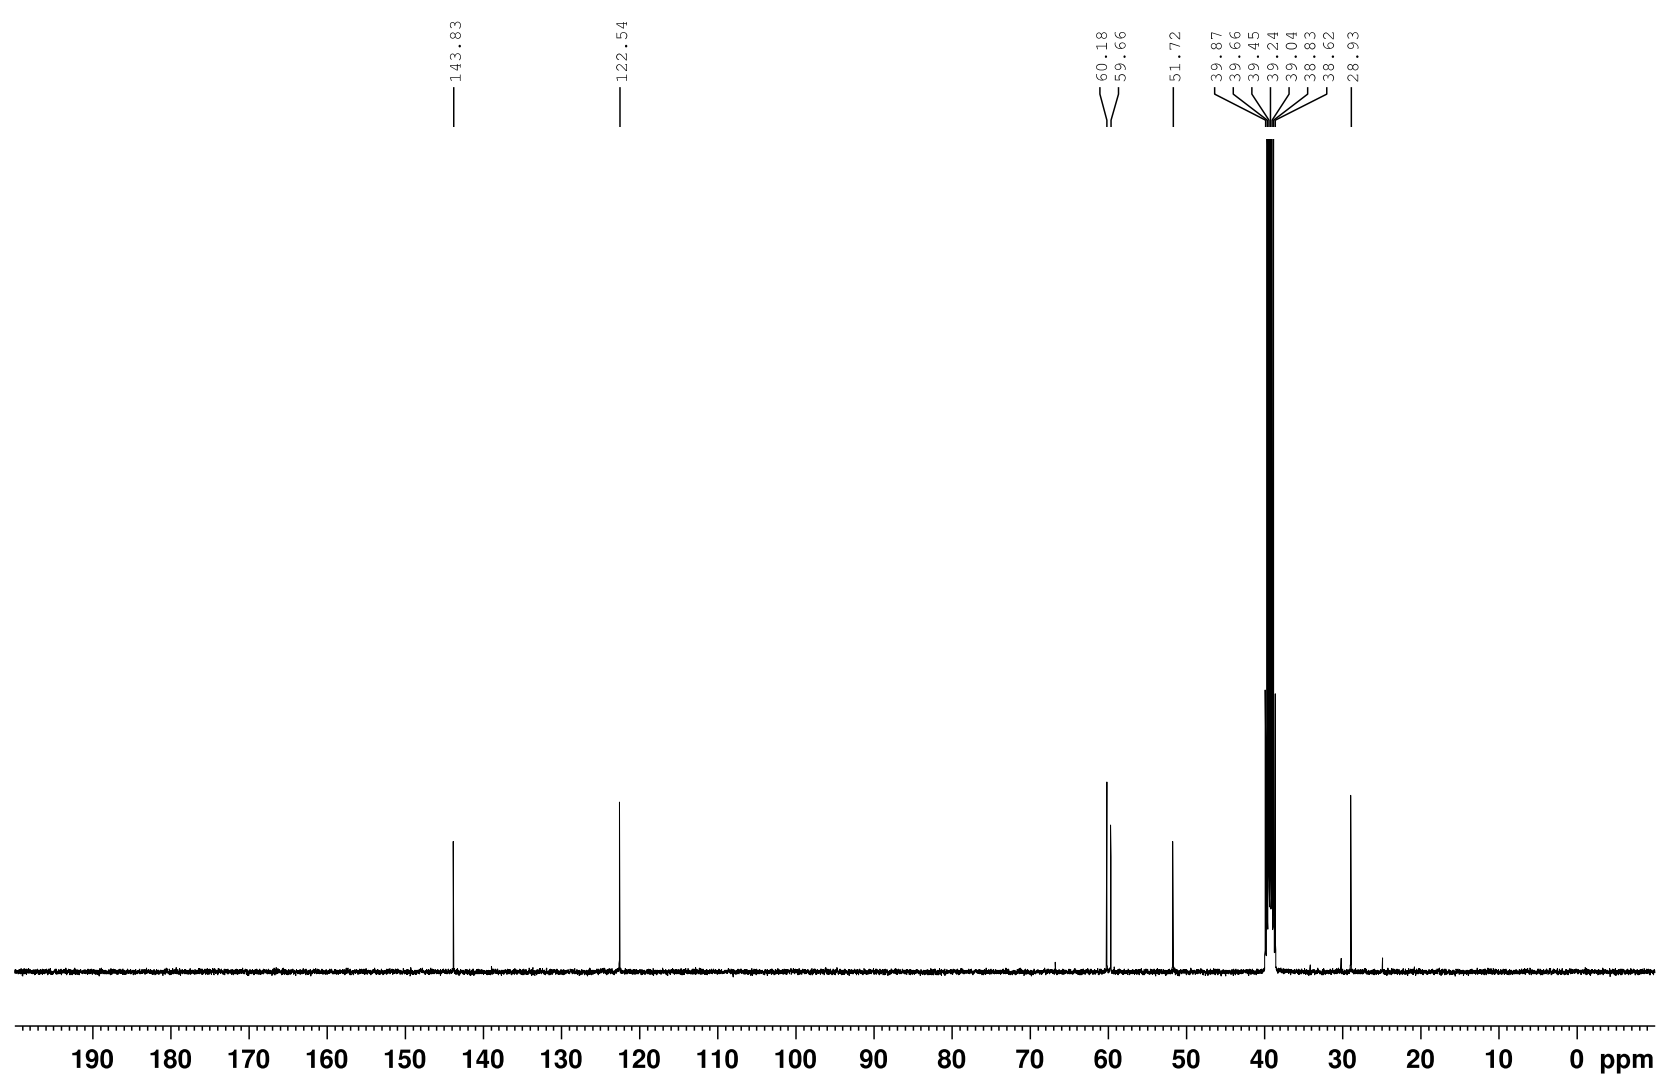

| <b>Si-LGL-TZ-LGL-Si</b>                                                            |           |      |                                                                      | <sup>13</sup> C-NMR (400 MHz, CDCl <sub>3</sub> ) |                          | HRMS (ESI)                                                                     |
|------------------------------------------------------------------------------------|-----------|------|----------------------------------------------------------------------|---------------------------------------------------|--------------------------|--------------------------------------------------------------------------------|
| 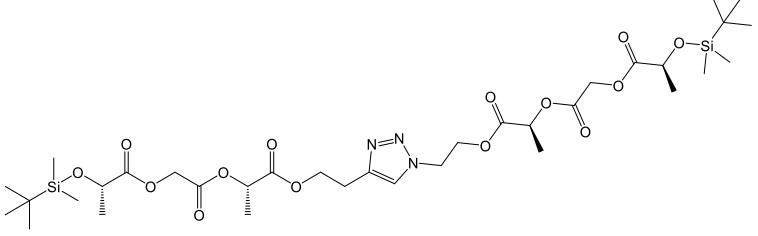 |           |      |                                                                      | $\delta$ (ppm) + Assignment                       |                          | <u>Calc. Mass</u>                                                              |
|                                                                                    |           |      |                                                                      | -5.19                                             | CH <sub>3</sub> (Si)     | 789.35 amu                                                                     |
|                                                                                    |           |      |                                                                      | -4.83                                             | CH <sub>3</sub> (Si)     |                                                                                |
|                                                                                    |           |      |                                                                      | 16.79                                             | CH <sub>3</sub>          | <u>Calc.</u>                                                                   |
|                                                                                    |           |      |                                                                      | 16.96                                             | CH <sub>3</sub>          | [M + H] <sup>+</sup>                                                           |
|                                                                                    |           |      |                                                                      | 18.40                                             | CH <sub>3</sub>          | 790.35 amu                                                                     |
|                                                                                    |           |      |                                                                      | 21.50                                             | CH <sub>3</sub>          |                                                                                |
|                                                                                    |           |      |                                                                      | 25.46                                             | CH <sub>2</sub> (Linker) | <u>Found</u>                                                                   |
|                                                                                    |           |      |                                                                      | 25.80                                             | t-Bu (Si)                | [M + H] <sup>+</sup>                                                           |
|                                                                                    |           |      |                                                                      | 48.83                                             | CH <sub>2</sub> (Linker) | 790.35898 amu                                                                  |
| <sup>1</sup> H-NMR (400 MHz, CDCl <sub>3</sub> )                                   |           |      |                                                                      | 60.62                                             | CH <sub>2</sub>          |                                                                                |
| d $\delta$ (ppm)                                                                   | Mult. (J) | Int. | Assignment                                                           | 63.56                                             | CH <sub>2</sub>          | <u>Composition</u>                                                             |
| 0.09                                                                               | m         | 12   | Si (CH <sub>3</sub> )                                                | 64.34                                             | CH <sub>2</sub>          | C <sub>34</sub> H <sub>59</sub> N <sub>3</sub> O <sub>14</sub> Si <sub>2</sub> |
| 0.89                                                                               | m         | 18   | Si (t-Bu)                                                            | 68.15                                             | CH                       |                                                                                |
| 1.46                                                                               | m         | 12   | L <sub>1</sub> (CH <sub>3</sub> ), L <sub>2</sub> (CH <sub>3</sub> ) | 69.44                                             | CH                       |                                                                                |
| 3.09                                                                               | m         | 2    | Linker (CH <sub>2</sub> $\alpha$ -olefin)                            | 69.46                                             | CH                       |                                                                                |
| 4.44                                                                               | m         | 4    | L <sub>1</sub> (CH), Linker (CH <sub>2</sub> $\alpha$ -N)            | 122.74                                            | CH (Linker)              |                                                                                |
| 4.53                                                                               | m         | 2    | Linker (CH <sub>2</sub> $\beta$ -olefin)                             | 144.07                                            | C (Linker)               |                                                                                |
| 4.71                                                                               | m         | 6    | G <sub>1</sub> , Linker (CH <sub>2</sub> $\beta$ -N)                 | 167.14                                            | CO                       |                                                                                |
| 5.10                                                                               | m         | 2    | L <sub>2</sub> (CH)                                                  | 167.28                                            | CO                       |                                                                                |
| 7.55                                                                               | s         | 1    | Linker (Olefin)                                                      | 169.79                                            | CO                       |                                                                                |
|                                                                                    |           |      |                                                                      | 170.06                                            | CO                       |                                                                                |
|                                                                                    |           |      |                                                                      | 173.57                                            | CO                       |                                                                                |
|                                                                                    |           |      |                                                                      | 173.64                                            | CO                       |                                                                                |

**LGL-Si** (1.12 g, 3.34 mmol, 2.3 eq) and the triazole diol (0.238 g, 1.45 mmol, 1 eq) were dissolved in dry THF (35 mL, 0.1 M) and added to a flame-dried Schlenk flask under nitrogen. DPTS (0.192 g, 0.65 mmol, 0.45 eq) and DCC (0.69 g, 3.34 mmol, 2.3 eq) were then added to the reaction mixture sequentially and allowed to stir at RT overnight. Upon consumption of starting material by TLC, the reaction mixture was filtered to remove DCU, concentrated and crude oil was purified via column chromatography (silica, EtOAc/hexanes) to yield a colorless oil (0.928 g, 81% yield).

JHS-3032; Si-LGL-TZ-LGL-Si; CDCl<sub>3</sub>; 1H; 400a;  
16 Scans; 11/16/16

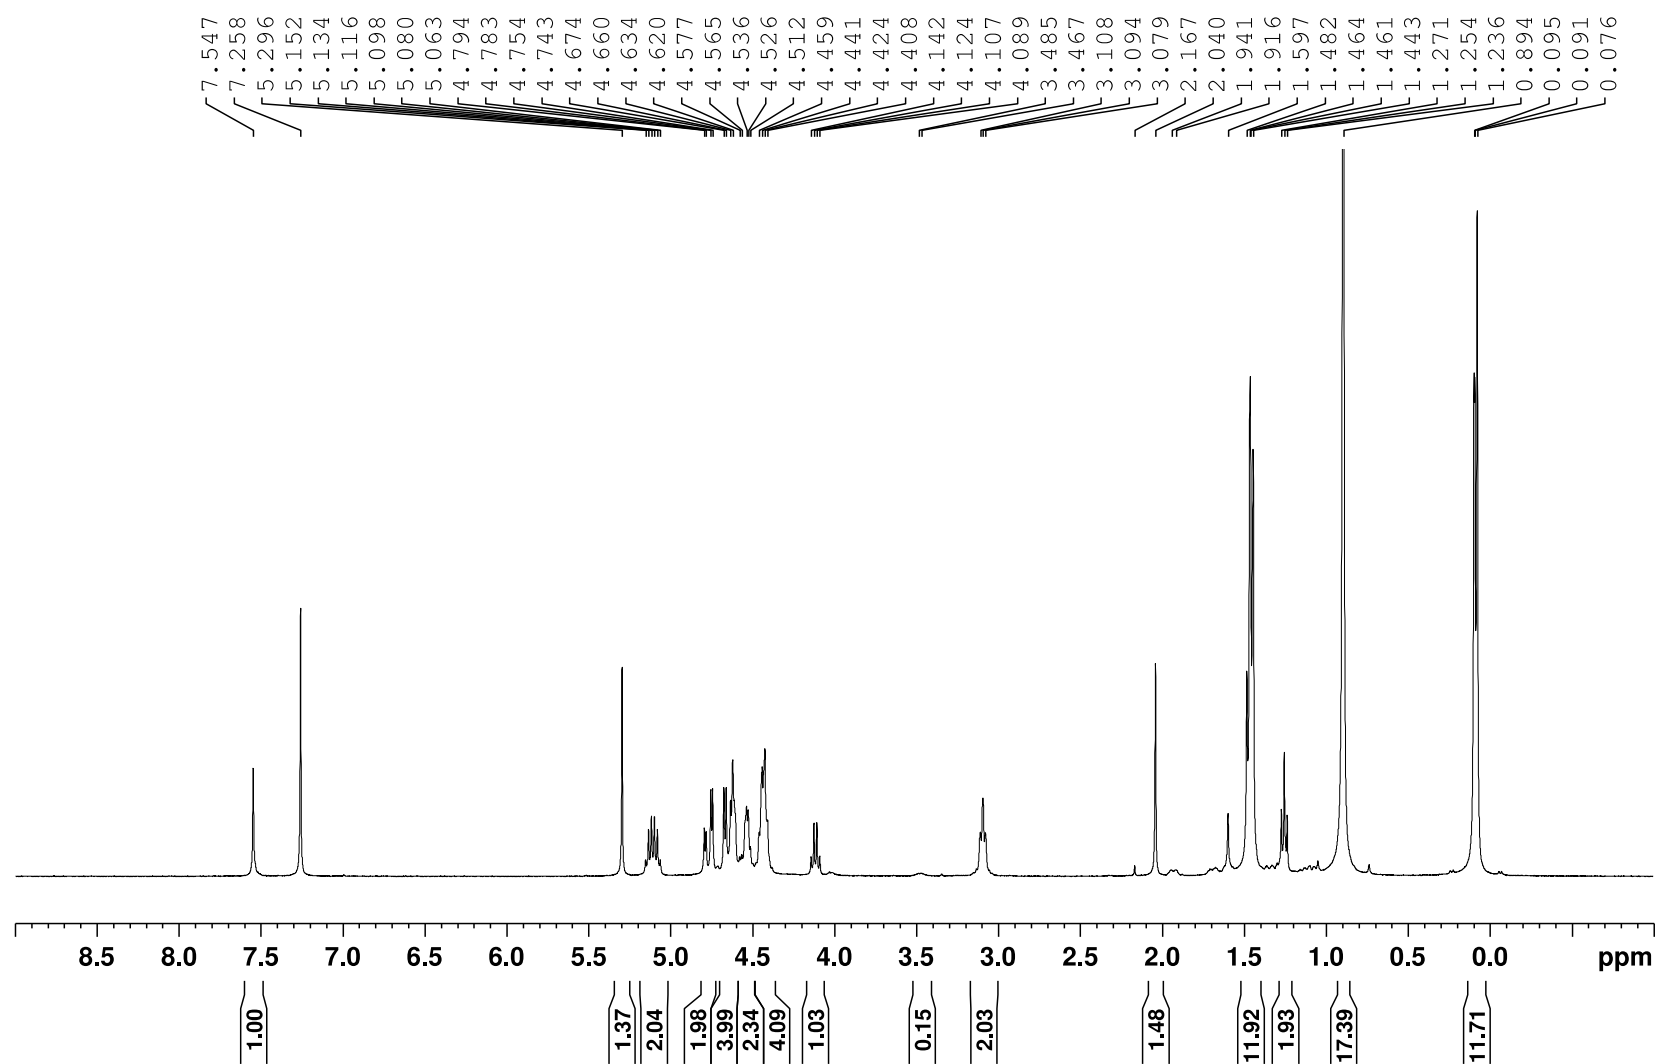

JHS-3032; Si-LGL-TZ-LGL-Si; CDCl<sub>3</sub>; 13C; 400a;  
2048 Scans; 11/16/16

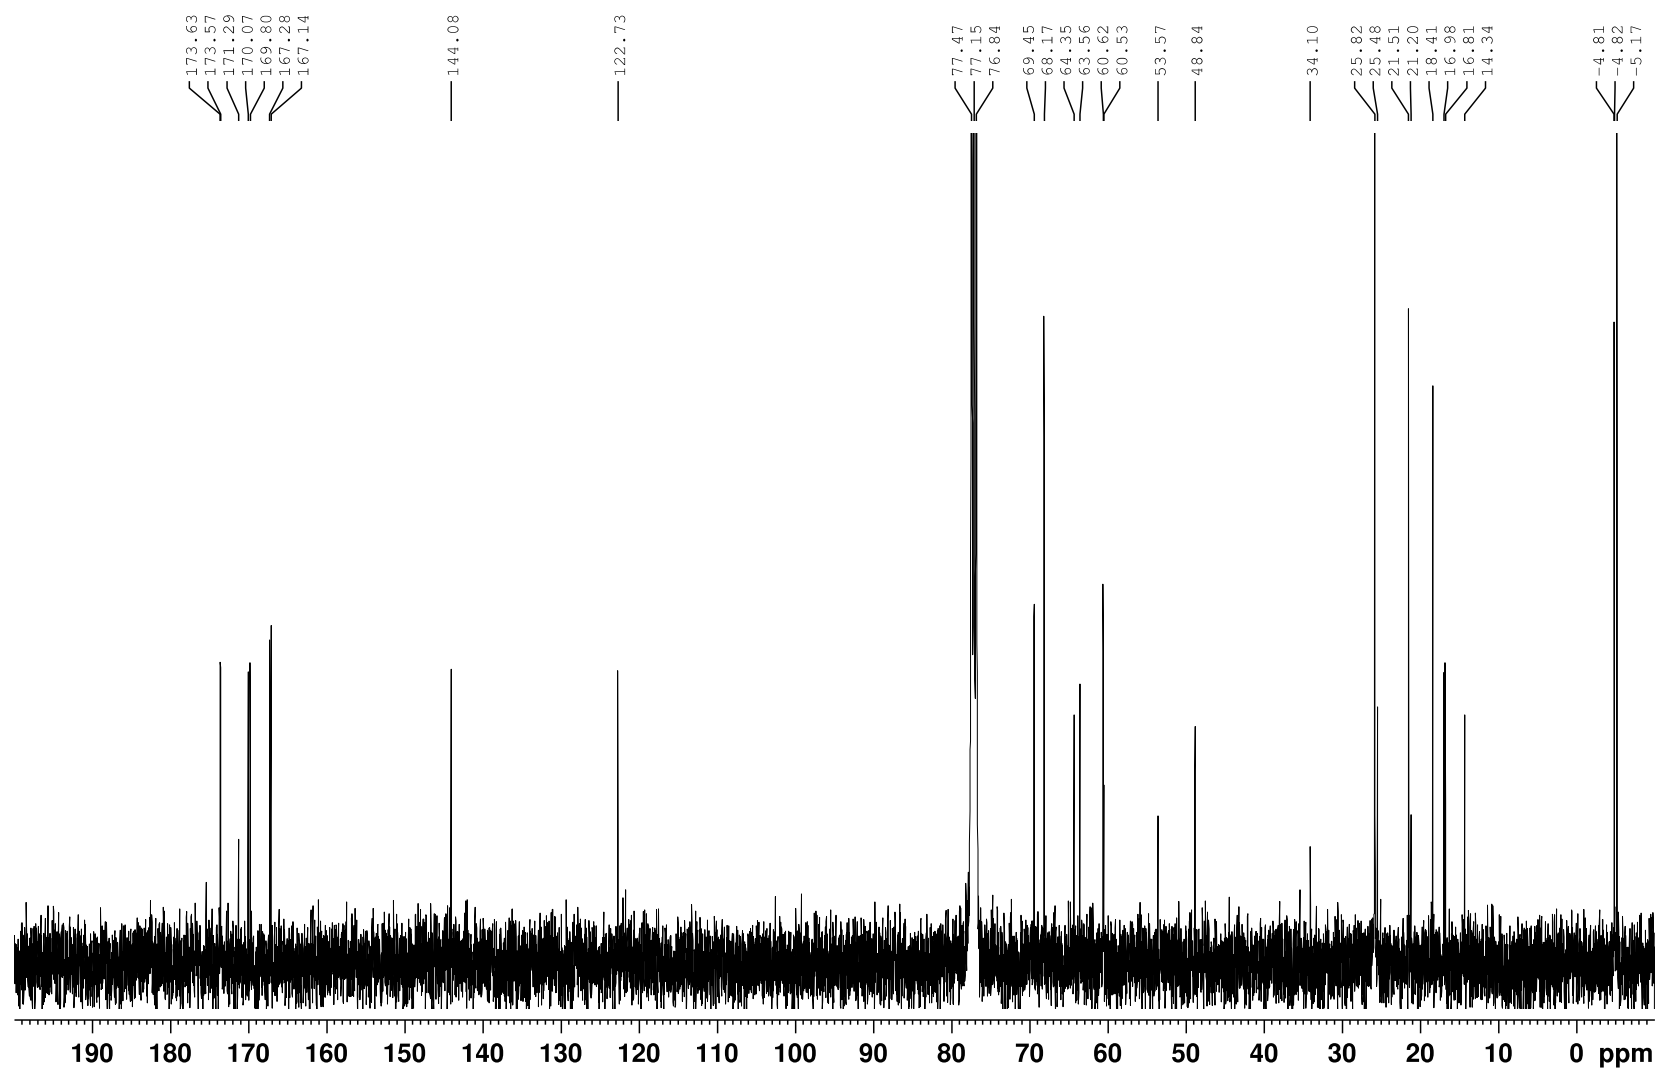

| <b>LGL-TZ-LGL</b>                                                                                                                                                                                                                                                                                                                                                                                                                                                                                                                                                                                                                                                                                                                                                                                                                                                                                                                                                                                                                                                                                                                                                                                                                                                                                                                                                                                                                                                                                                                                                                                                                                                                                                                                                                                                                                                                                                                                |                 |                                                                                      |  | <sup>13</sup> C-NMR (400 MHz, CDCl <sub>3</sub> ) |                          | HRMS (ESI)                           |                                                                      |                  |           |      |            |      |   |    |                                                                      |      |   |   |                                           |      |   |   |                                                           |      |   |   |                                          |      |   |   |                                     |      |   |   |                |      |   |   |                     |      |   |   |                 |       |                 |                                      |
|--------------------------------------------------------------------------------------------------------------------------------------------------------------------------------------------------------------------------------------------------------------------------------------------------------------------------------------------------------------------------------------------------------------------------------------------------------------------------------------------------------------------------------------------------------------------------------------------------------------------------------------------------------------------------------------------------------------------------------------------------------------------------------------------------------------------------------------------------------------------------------------------------------------------------------------------------------------------------------------------------------------------------------------------------------------------------------------------------------------------------------------------------------------------------------------------------------------------------------------------------------------------------------------------------------------------------------------------------------------------------------------------------------------------------------------------------------------------------------------------------------------------------------------------------------------------------------------------------------------------------------------------------------------------------------------------------------------------------------------------------------------------------------------------------------------------------------------------------------------------------------------------------------------------------------------------------|-----------------|--------------------------------------------------------------------------------------|--|---------------------------------------------------|--------------------------|--------------------------------------|----------------------------------------------------------------------|------------------|-----------|------|------------|------|---|----|----------------------------------------------------------------------|------|---|---|-------------------------------------------|------|---|---|-----------------------------------------------------------|------|---|---|------------------------------------------|------|---|---|-------------------------------------|------|---|---|----------------|------|---|---|---------------------|------|---|---|-----------------|-------|-----------------|--------------------------------------|
| 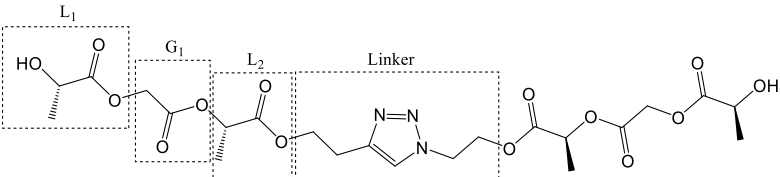                                                                                                                                                                                                                                                                                                                                                                                                                                                                                                                                                                                                                                                                                                                                                                                                                                                                                                                                                                                                                                                                                                                                                                                                                                                                                                                                                                                                                                                                                                                                                                                                                                                                                                                                                                                                                                                               |                 |                                                                                      |  | $\delta$ (ppm) + Assignment                       |                          | <u>Calc. Mass</u>                    |                                                                      |                  |           |      |            |      |   |    |                                                                      |      |   |   |                                           |      |   |   |                                                           |      |   |   |                                          |      |   |   |                                     |      |   |   |                |      |   |   |                     |      |   |   |                 |       |                 |                                      |
|                                                                                                                                                                                                                                                                                                                                                                                                                                                                                                                                                                                                                                                                                                                                                                                                                                                                                                                                                                                                                                                                                                                                                                                                                                                                                                                                                                                                                                                                                                                                                                                                                                                                                                                                                                                                                                                                                                                                                  |                 |                                                                                      |  | 16.77                                             | CH <sub>3</sub>          | 561.18 amu                           |                                                                      |                  |           |      |            |      |   |    |                                                                      |      |   |   |                                           |      |   |   |                                                           |      |   |   |                                          |      |   |   |                                     |      |   |   |                |      |   |   |                     |      |   |   |                 |       |                 |                                      |
| <table border="1" style="width: 100%; border-collapse: collapse;"> <thead> <tr> <th colspan="4" style="text-align: center;"><sup>1</sup>H-NMR (400 MHz, CDCl<sub>3</sub>)</th> </tr> <tr> <th style="text-align: center;">d<math>\delta</math> (ppm)</th> <th style="text-align: center;">Mult. (J)</th> <th style="text-align: center;">Int.</th> <th style="text-align: center;">Assignment</th> </tr> </thead> <tbody> <tr> <td style="text-align: center;">1.49</td> <td style="text-align: center;">m</td> <td style="text-align: center;">12</td> <td>L<sub>1</sub> (CH<sub>3</sub>), L<sub>2</sub> (CH<sub>3</sub>)</td> </tr> <tr> <td style="text-align: center;">3.11</td> <td style="text-align: center;">m</td> <td style="text-align: center;">2</td> <td>Linker (CH<sub>2</sub> <math>\alpha</math>-olefin)</td> </tr> <tr> <td style="text-align: center;">4.44</td> <td style="text-align: center;">m</td> <td style="text-align: center;">4</td> <td>L<sub>1</sub> (CH), Linker (CH<sub>2</sub> <math>\alpha</math>-N)</td> </tr> <tr> <td style="text-align: center;">4.54</td> <td style="text-align: center;">m</td> <td style="text-align: center;">2</td> <td>Linker (CH<sub>2</sub> <math>\beta</math>-olefin)</td> </tr> <tr> <td style="text-align: center;">4.63</td> <td style="text-align: center;">m</td> <td style="text-align: center;">2</td> <td>Linker (CH<sub>2</sub> <math>\beta</math>-N)</td> </tr> <tr> <td style="text-align: center;">4.76</td> <td style="text-align: center;">m</td> <td style="text-align: center;">4</td> <td>G<sub>1</sub></td> </tr> <tr> <td style="text-align: center;">5.10</td> <td style="text-align: center;">m</td> <td style="text-align: center;">2</td> <td>L<sub>2</sub> (CH)</td> </tr> <tr> <td style="text-align: center;">7.53</td> <td style="text-align: center;">s</td> <td style="text-align: center;">1</td> <td>Linker (Olefin)</td> </tr> </tbody> </table> |                 |                                                                                      |  | <sup>1</sup> H-NMR (400 MHz, CDCl <sub>3</sub> )  |                          |                                      |                                                                      | d $\delta$ (ppm) | Mult. (J) | Int. | Assignment | 1.49 | m | 12 | L <sub>1</sub> (CH <sub>3</sub> ), L <sub>2</sub> (CH <sub>3</sub> ) | 3.11 | m | 2 | Linker (CH <sub>2</sub> $\alpha$ -olefin) | 4.44 | m | 4 | L <sub>1</sub> (CH), Linker (CH <sub>2</sub> $\alpha$ -N) | 4.54 | m | 2 | Linker (CH <sub>2</sub> $\beta$ -olefin) | 4.63 | m | 2 | Linker (CH <sub>2</sub> $\beta$ -N) | 4.76 | m | 4 | G <sub>1</sub> | 5.10 | m | 2 | L <sub>2</sub> (CH) | 7.53 | s | 1 | Linker (Olefin) | 16.90 | CH <sub>3</sub> | <u>Calc.</u><br>[M + H] <sup>+</sup> |
|                                                                                                                                                                                                                                                                                                                                                                                                                                                                                                                                                                                                                                                                                                                                                                                                                                                                                                                                                                                                                                                                                                                                                                                                                                                                                                                                                                                                                                                                                                                                                                                                                                                                                                                                                                                                                                                                                                                                                  |                 |                                                                                      |  | <sup>1</sup> H-NMR (400 MHz, CDCl <sub>3</sub> )  |                          |                                      |                                                                      |                  |           |      |            |      |   |    |                                                                      |      |   |   |                                           |      |   |   |                                                           |      |   |   |                                          |      |   |   |                                     |      |   |   |                |      |   |   |                     |      |   |   |                 |       |                 |                                      |
|                                                                                                                                                                                                                                                                                                                                                                                                                                                                                                                                                                                                                                                                                                                                                                                                                                                                                                                                                                                                                                                                                                                                                                                                                                                                                                                                                                                                                                                                                                                                                                                                                                                                                                                                                                                                                                                                                                                                                  |                 |                                                                                      |  | d $\delta$ (ppm)                                  | Mult. (J)                | Int.                                 | Assignment                                                           |                  |           |      |            |      |   |    |                                                                      |      |   |   |                                           |      |   |   |                                                           |      |   |   |                                          |      |   |   |                                     |      |   |   |                |      |   |   |                     |      |   |   |                 |       |                 |                                      |
|                                                                                                                                                                                                                                                                                                                                                                                                                                                                                                                                                                                                                                                                                                                                                                                                                                                                                                                                                                                                                                                                                                                                                                                                                                                                                                                                                                                                                                                                                                                                                                                                                                                                                                                                                                                                                                                                                                                                                  |                 |                                                                                      |  | 1.49                                              | m                        | 12                                   | L <sub>1</sub> (CH <sub>3</sub> ), L <sub>2</sub> (CH <sub>3</sub> ) |                  |           |      |            |      |   |    |                                                                      |      |   |   |                                           |      |   |   |                                                           |      |   |   |                                          |      |   |   |                                     |      |   |   |                |      |   |   |                     |      |   |   |                 |       |                 |                                      |
|                                                                                                                                                                                                                                                                                                                                                                                                                                                                                                                                                                                                                                                                                                                                                                                                                                                                                                                                                                                                                                                                                                                                                                                                                                                                                                                                                                                                                                                                                                                                                                                                                                                                                                                                                                                                                                                                                                                                                  |                 |                                                                                      |  | 3.11                                              | m                        | 2                                    | Linker (CH <sub>2</sub> $\alpha$ -olefin)                            |                  |           |      |            |      |   |    |                                                                      |      |   |   |                                           |      |   |   |                                                           |      |   |   |                                          |      |   |   |                                     |      |   |   |                |      |   |   |                     |      |   |   |                 |       |                 |                                      |
|                                                                                                                                                                                                                                                                                                                                                                                                                                                                                                                                                                                                                                                                                                                                                                                                                                                                                                                                                                                                                                                                                                                                                                                                                                                                                                                                                                                                                                                                                                                                                                                                                                                                                                                                                                                                                                                                                                                                                  |                 |                                                                                      |  | 4.44                                              | m                        | 4                                    | L <sub>1</sub> (CH), Linker (CH <sub>2</sub> $\alpha$ -N)            |                  |           |      |            |      |   |    |                                                                      |      |   |   |                                           |      |   |   |                                                           |      |   |   |                                          |      |   |   |                                     |      |   |   |                |      |   |   |                     |      |   |   |                 |       |                 |                                      |
|                                                                                                                                                                                                                                                                                                                                                                                                                                                                                                                                                                                                                                                                                                                                                                                                                                                                                                                                                                                                                                                                                                                                                                                                                                                                                                                                                                                                                                                                                                                                                                                                                                                                                                                                                                                                                                                                                                                                                  |                 |                                                                                      |  | 4.54                                              | m                        | 2                                    | Linker (CH <sub>2</sub> $\beta$ -olefin)                             |                  |           |      |            |      |   |    |                                                                      |      |   |   |                                           |      |   |   |                                                           |      |   |   |                                          |      |   |   |                                     |      |   |   |                |      |   |   |                     |      |   |   |                 |       |                 |                                      |
|                                                                                                                                                                                                                                                                                                                                                                                                                                                                                                                                                                                                                                                                                                                                                                                                                                                                                                                                                                                                                                                                                                                                                                                                                                                                                                                                                                                                                                                                                                                                                                                                                                                                                                                                                                                                                                                                                                                                                  |                 |                                                                                      |  | 4.63                                              | m                        | 2                                    | Linker (CH <sub>2</sub> $\beta$ -N)                                  |                  |           |      |            |      |   |    |                                                                      |      |   |   |                                           |      |   |   |                                                           |      |   |   |                                          |      |   |   |                                     |      |   |   |                |      |   |   |                     |      |   |   |                 |       |                 |                                      |
|                                                                                                                                                                                                                                                                                                                                                                                                                                                                                                                                                                                                                                                                                                                                                                                                                                                                                                                                                                                                                                                                                                                                                                                                                                                                                                                                                                                                                                                                                                                                                                                                                                                                                                                                                                                                                                                                                                                                                  |                 |                                                                                      |  | 4.76                                              | m                        | 4                                    | G <sub>1</sub>                                                       |                  |           |      |            |      |   |    |                                                                      |      |   |   |                                           |      |   |   |                                                           |      |   |   |                                          |      |   |   |                                     |      |   |   |                |      |   |   |                     |      |   |   |                 |       |                 |                                      |
|                                                                                                                                                                                                                                                                                                                                                                                                                                                                                                                                                                                                                                                                                                                                                                                                                                                                                                                                                                                                                                                                                                                                                                                                                                                                                                                                                                                                                                                                                                                                                                                                                                                                                                                                                                                                                                                                                                                                                  |                 |                                                                                      |  | 5.10                                              | m                        | 2                                    | L <sub>2</sub> (CH)                                                  |                  |           |      |            |      |   |    |                                                                      |      |   |   |                                           |      |   |   |                                                           |      |   |   |                                          |      |   |   |                                     |      |   |   |                |      |   |   |                     |      |   |   |                 |       |                 |                                      |
|                                                                                                                                                                                                                                                                                                                                                                                                                                                                                                                                                                                                                                                                                                                                                                                                                                                                                                                                                                                                                                                                                                                                                                                                                                                                                                                                                                                                                                                                                                                                                                                                                                                                                                                                                                                                                                                                                                                                                  |                 |                                                                                      |  | 7.53                                              | s                        | 1                                    | Linker (Olefin)                                                      |                  |           |      |            |      |   |    |                                                                      |      |   |   |                                           |      |   |   |                                                           |      |   |   |                                          |      |   |   |                                     |      |   |   |                |      |   |   |                     |      |   |   |                 |       |                 |                                      |
|                                                                                                                                                                                                                                                                                                                                                                                                                                                                                                                                                                                                                                                                                                                                                                                                                                                                                                                                                                                                                                                                                                                                                                                                                                                                                                                                                                                                                                                                                                                                                                                                                                                                                                                                                                                                                                                                                                                                                  |                 |                                                                                      |  | 20.39                                             | CH <sub>3</sub>          | 562.18 amu                           |                                                                      |                  |           |      |            |      |   |    |                                                                      |      |   |   |                                           |      |   |   |                                                           |      |   |   |                                          |      |   |   |                                     |      |   |   |                |      |   |   |                     |      |   |   |                 |       |                 |                                      |
|                                                                                                                                                                                                                                                                                                                                                                                                                                                                                                                                                                                                                                                                                                                                                                                                                                                                                                                                                                                                                                                                                                                                                                                                                                                                                                                                                                                                                                                                                                                                                                                                                                                                                                                                                                                                                                                                                                                                                  |                 |                                                                                      |  | 20.41                                             | CH <sub>3</sub>          | <u>Found</u><br>[M + H] <sup>+</sup> |                                                                      |                  |           |      |            |      |   |    |                                                                      |      |   |   |                                           |      |   |   |                                                           |      |   |   |                                          |      |   |   |                                     |      |   |   |                |      |   |   |                     |      |   |   |                 |       |                 |                                      |
|                                                                                                                                                                                                                                                                                                                                                                                                                                                                                                                                                                                                                                                                                                                                                                                                                                                                                                                                                                                                                                                                                                                                                                                                                                                                                                                                                                                                                                                                                                                                                                                                                                                                                                                                                                                                                                                                                                                                                  |                 |                                                                                      |  | 25.43                                             | CH <sub>2</sub> (Linker) |                                      |                                                                      |                  |           |      |            |      |   |    |                                                                      |      |   |   |                                           |      |   |   |                                                           |      |   |   |                                          |      |   |   |                                     |      |   |   |                |      |   |   |                     |      |   |   |                 |       |                 |                                      |
|                                                                                                                                                                                                                                                                                                                                                                                                                                                                                                                                                                                                                                                                                                                                                                                                                                                                                                                                                                                                                                                                                                                                                                                                                                                                                                                                                                                                                                                                                                                                                                                                                                                                                                                                                                                                                                                                                                                                                  |                 |                                                                                      |  | 48.84                                             | CH <sub>2</sub> (Linker) | <u>Found</u><br>[M + H] <sup>+</sup> |                                                                      |                  |           |      |            |      |   |    |                                                                      |      |   |   |                                           |      |   |   |                                                           |      |   |   |                                          |      |   |   |                                     |      |   |   |                |      |   |   |                     |      |   |   |                 |       |                 |                                      |
|                                                                                                                                                                                                                                                                                                                                                                                                                                                                                                                                                                                                                                                                                                                                                                                                                                                                                                                                                                                                                                                                                                                                                                                                                                                                                                                                                                                                                                                                                                                                                                                                                                                                                                                                                                                                                                                                                                                                                  |                 |                                                                                      |  | 60.93                                             | CH <sub>2</sub>          |                                      |                                                                      |                  |           |      |            |      |   |    |                                                                      |      |   |   |                                           |      |   |   |                                                           |      |   |   |                                          |      |   |   |                                     |      |   |   |                |      |   |   |                     |      |   |   |                 |       |                 |                                      |
| 60.98                                                                                                                                                                                                                                                                                                                                                                                                                                                                                                                                                                                                                                                                                                                                                                                                                                                                                                                                                                                                                                                                                                                                                                                                                                                                                                                                                                                                                                                                                                                                                                                                                                                                                                                                                                                                                                                                                                                                            | CH <sub>2</sub> | <u>Found</u><br>[M + H] <sup>+</sup>                                                 |  |                                                   |                          |                                      |                                                                      |                  |           |      |            |      |   |    |                                                                      |      |   |   |                                           |      |   |   |                                                           |      |   |   |                                          |      |   |   |                                     |      |   |   |                |      |   |   |                     |      |   |   |                 |       |                 |                                      |
| 63.59                                                                                                                                                                                                                                                                                                                                                                                                                                                                                                                                                                                                                                                                                                                                                                                                                                                                                                                                                                                                                                                                                                                                                                                                                                                                                                                                                                                                                                                                                                                                                                                                                                                                                                                                                                                                                                                                                                                                            | CH <sub>2</sub> |                                                                                      |  |                                                   |                          |                                      |                                                                      |                  |           |      |            |      |   |    |                                                                      |      |   |   |                                           |      |   |   |                                                           |      |   |   |                                          |      |   |   |                                     |      |   |   |                |      |   |   |                     |      |   |   |                 |       |                 |                                      |
| 64.34                                                                                                                                                                                                                                                                                                                                                                                                                                                                                                                                                                                                                                                                                                                                                                                                                                                                                                                                                                                                                                                                                                                                                                                                                                                                                                                                                                                                                                                                                                                                                                                                                                                                                                                                                                                                                                                                                                                                            | CH <sub>2</sub> | amu                                                                                  |  |                                                   |                          |                                      |                                                                      |                  |           |      |            |      |   |    |                                                                      |      |   |   |                                           |      |   |   |                                                           |      |   |   |                                          |      |   |   |                                     |      |   |   |                |      |   |   |                     |      |   |   |                 |       |                 |                                      |
| 66.89                                                                                                                                                                                                                                                                                                                                                                                                                                                                                                                                                                                                                                                                                                                                                                                                                                                                                                                                                                                                                                                                                                                                                                                                                                                                                                                                                                                                                                                                                                                                                                                                                                                                                                                                                                                                                                                                                                                                            | CH <sub>2</sub> |                                                                                      |  |                                                   |                          |                                      |                                                                      |                  |           |      |            |      |   |    |                                                                      |      |   |   |                                           |      |   |   |                                                           |      |   |   |                                          |      |   |   |                                     |      |   |   |                |      |   |   |                     |      |   |   |                 |       |                 |                                      |
| 69.59                                                                                                                                                                                                                                                                                                                                                                                                                                                                                                                                                                                                                                                                                                                                                                                                                                                                                                                                                                                                                                                                                                                                                                                                                                                                                                                                                                                                                                                                                                                                                                                                                                                                                                                                                                                                                                                                                                                                            | CH              | <u>Composition</u><br>C <sub>22</sub> H <sub>31</sub> O <sub>15</sub> N <sub>3</sub> |  |                                                   |                          |                                      |                                                                      |                  |           |      |            |      |   |    |                                                                      |      |   |   |                                           |      |   |   |                                                           |      |   |   |                                          |      |   |   |                                     |      |   |   |                |      |   |   |                     |      |   |   |                 |       |                 |                                      |
| 69.71                                                                                                                                                                                                                                                                                                                                                                                                                                                                                                                                                                                                                                                                                                                                                                                                                                                                                                                                                                                                                                                                                                                                                                                                                                                                                                                                                                                                                                                                                                                                                                                                                                                                                                                                                                                                                                                                                                                                            | CH              |                                                                                      |  |                                                   |                          |                                      |                                                                      |                  |           |      |            |      |   |    |                                                                      |      |   |   |                                           |      |   |   |                                                           |      |   |   |                                          |      |   |   |                                     |      |   |   |                |      |   |   |                     |      |   |   |                 |       |                 |                                      |
| 122.69                                                                                                                                                                                                                                                                                                                                                                                                                                                                                                                                                                                                                                                                                                                                                                                                                                                                                                                                                                                                                                                                                                                                                                                                                                                                                                                                                                                                                                                                                                                                                                                                                                                                                                                                                                                                                                                                                                                                           | CH (Linker)     | <u>Composition</u><br>C <sub>22</sub> H <sub>31</sub> O <sub>15</sub> N <sub>3</sub> |  |                                                   |                          |                                      |                                                                      |                  |           |      |            |      |   |    |                                                                      |      |   |   |                                           |      |   |   |                                                           |      |   |   |                                          |      |   |   |                                     |      |   |   |                |      |   |   |                     |      |   |   |                 |       |                 |                                      |
| 144.12                                                                                                                                                                                                                                                                                                                                                                                                                                                                                                                                                                                                                                                                                                                                                                                                                                                                                                                                                                                                                                                                                                                                                                                                                                                                                                                                                                                                                                                                                                                                                                                                                                                                                                                                                                                                                                                                                                                                           | C (Linker)      |                                                                                      |  |                                                   |                          |                                      |                                                                      |                  |           |      |            |      |   |    |                                                                      |      |   |   |                                           |      |   |   |                                                           |      |   |   |                                          |      |   |   |                                     |      |   |   |                |      |   |   |                     |      |   |   |                 |       |                 |                                      |
| 167.05                                                                                                                                                                                                                                                                                                                                                                                                                                                                                                                                                                                                                                                                                                                                                                                                                                                                                                                                                                                                                                                                                                                                                                                                                                                                                                                                                                                                                                                                                                                                                                                                                                                                                                                                                                                                                                                                                                                                           | CO              | <u>Composition</u><br>C <sub>22</sub> H <sub>31</sub> O <sub>15</sub> N <sub>3</sub> |  |                                                   |                          |                                      |                                                                      |                  |           |      |            |      |   |    |                                                                      |      |   |   |                                           |      |   |   |                                                           |      |   |   |                                          |      |   |   |                                     |      |   |   |                |      |   |   |                     |      |   |   |                 |       |                 |                                      |
| 167.09                                                                                                                                                                                                                                                                                                                                                                                                                                                                                                                                                                                                                                                                                                                                                                                                                                                                                                                                                                                                                                                                                                                                                                                                                                                                                                                                                                                                                                                                                                                                                                                                                                                                                                                                                                                                                                                                                                                                           | CO              |                                                                                      |  |                                                   |                          |                                      |                                                                      |                  |           |      |            |      |   |    |                                                                      |      |   |   |                                           |      |   |   |                                                           |      |   |   |                                          |      |   |   |                                     |      |   |   |                |      |   |   |                     |      |   |   |                 |       |                 |                                      |
| 169.84                                                                                                                                                                                                                                                                                                                                                                                                                                                                                                                                                                                                                                                                                                                                                                                                                                                                                                                                                                                                                                                                                                                                                                                                                                                                                                                                                                                                                                                                                                                                                                                                                                                                                                                                                                                                                                                                                                                                           | CO              |                                                                                      |  |                                                   |                          |                                      |                                                                      |                  |           |      |            |      |   |    |                                                                      |      |   |   |                                           |      |   |   |                                                           |      |   |   |                                          |      |   |   |                                     |      |   |   |                |      |   |   |                     |      |   |   |                 |       |                 |                                      |
| 170.14                                                                                                                                                                                                                                                                                                                                                                                                                                                                                                                                                                                                                                                                                                                                                                                                                                                                                                                                                                                                                                                                                                                                                                                                                                                                                                                                                                                                                                                                                                                                                                                                                                                                                                                                                                                                                                                                                                                                           | CO              |                                                                                      |  |                                                   |                          |                                      |                                                                      |                  |           |      |            |      |   |    |                                                                      |      |   |   |                                           |      |   |   |                                                           |      |   |   |                                          |      |   |   |                                     |      |   |   |                |      |   |   |                     |      |   |   |                 |       |                 |                                      |
| 175.04                                                                                                                                                                                                                                                                                                                                                                                                                                                                                                                                                                                                                                                                                                                                                                                                                                                                                                                                                                                                                                                                                                                                                                                                                                                                                                                                                                                                                                                                                                                                                                                                                                                                                                                                                                                                                                                                                                                                           | CO              |                                                                                      |  |                                                   |                          |                                      |                                                                      |                  |           |      |            |      |   |    |                                                                      |      |   |   |                                           |      |   |   |                                                           |      |   |   |                                          |      |   |   |                                     |      |   |   |                |      |   |   |                     |      |   |   |                 |       |                 |                                      |
| 175.05                                                                                                                                                                                                                                                                                                                                                                                                                                                                                                                                                                                                                                                                                                                                                                                                                                                                                                                                                                                                                                                                                                                                                                                                                                                                                                                                                                                                                                                                                                                                                                                                                                                                                                                                                                                                                                                                                                                                           | CO              |                                                                                      |  |                                                   |                          |                                      |                                                                      |                  |           |      |            |      |   |    |                                                                      |      |   |   |                                           |      |   |   |                                                           |      |   |   |                                          |      |   |   |                                     |      |   |   |                |      |   |   |                     |      |   |   |                 |       |                 |                                      |

AcOH (0.9 mL, 16 mmol, 12 eq) and TBAF (1 M in THF) (4 mL, 4 mmol, 3 eq) were dried over activated sieves for 2 h. **Si-LGL-TZ-LGL-Si** (1.04 g, 1.32 mmol, 1 eq) was dissolved in dry THF (33 mL, 0.04 M) in a flame dried Schlenk flask under nitrogen. AcOH and TBAF were added dropwise at 0°C, allowed to warm to RT and stir for 30 h. The reaction mixture was then diluted with brine and extracted with EtOAc 3x, combined organic layers were washed with brine 3x, dried over MgSO<sub>4</sub>, concentrated and the crude oil was then purified via column chromatography (silica, EtOAc/hexanes) to yield a colorless oil (530 mg, 72% yield).

JHS-3033; LGL-TZ-LGL; CDC13; 1H; 400a;  
16 Scans; 11/18/16

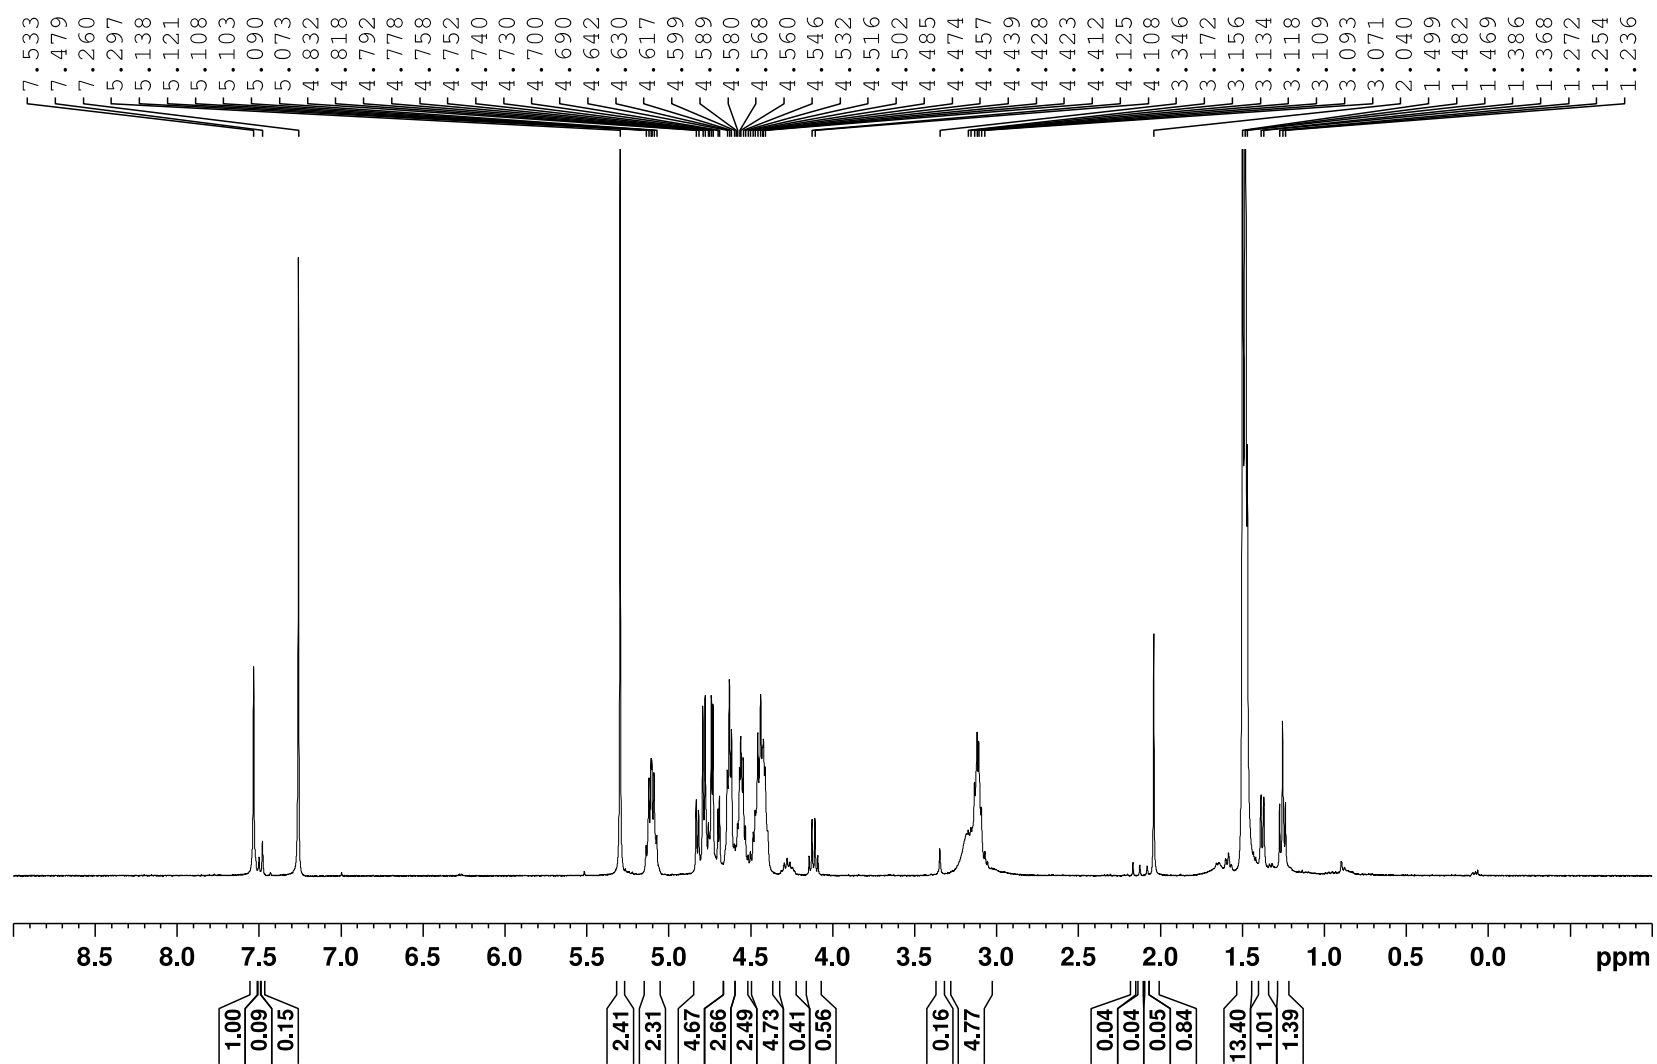

JHS-3033; LGL-TZ-LGL; CDC13; 13C; 400a;  
2048 Scans; 11/18/16

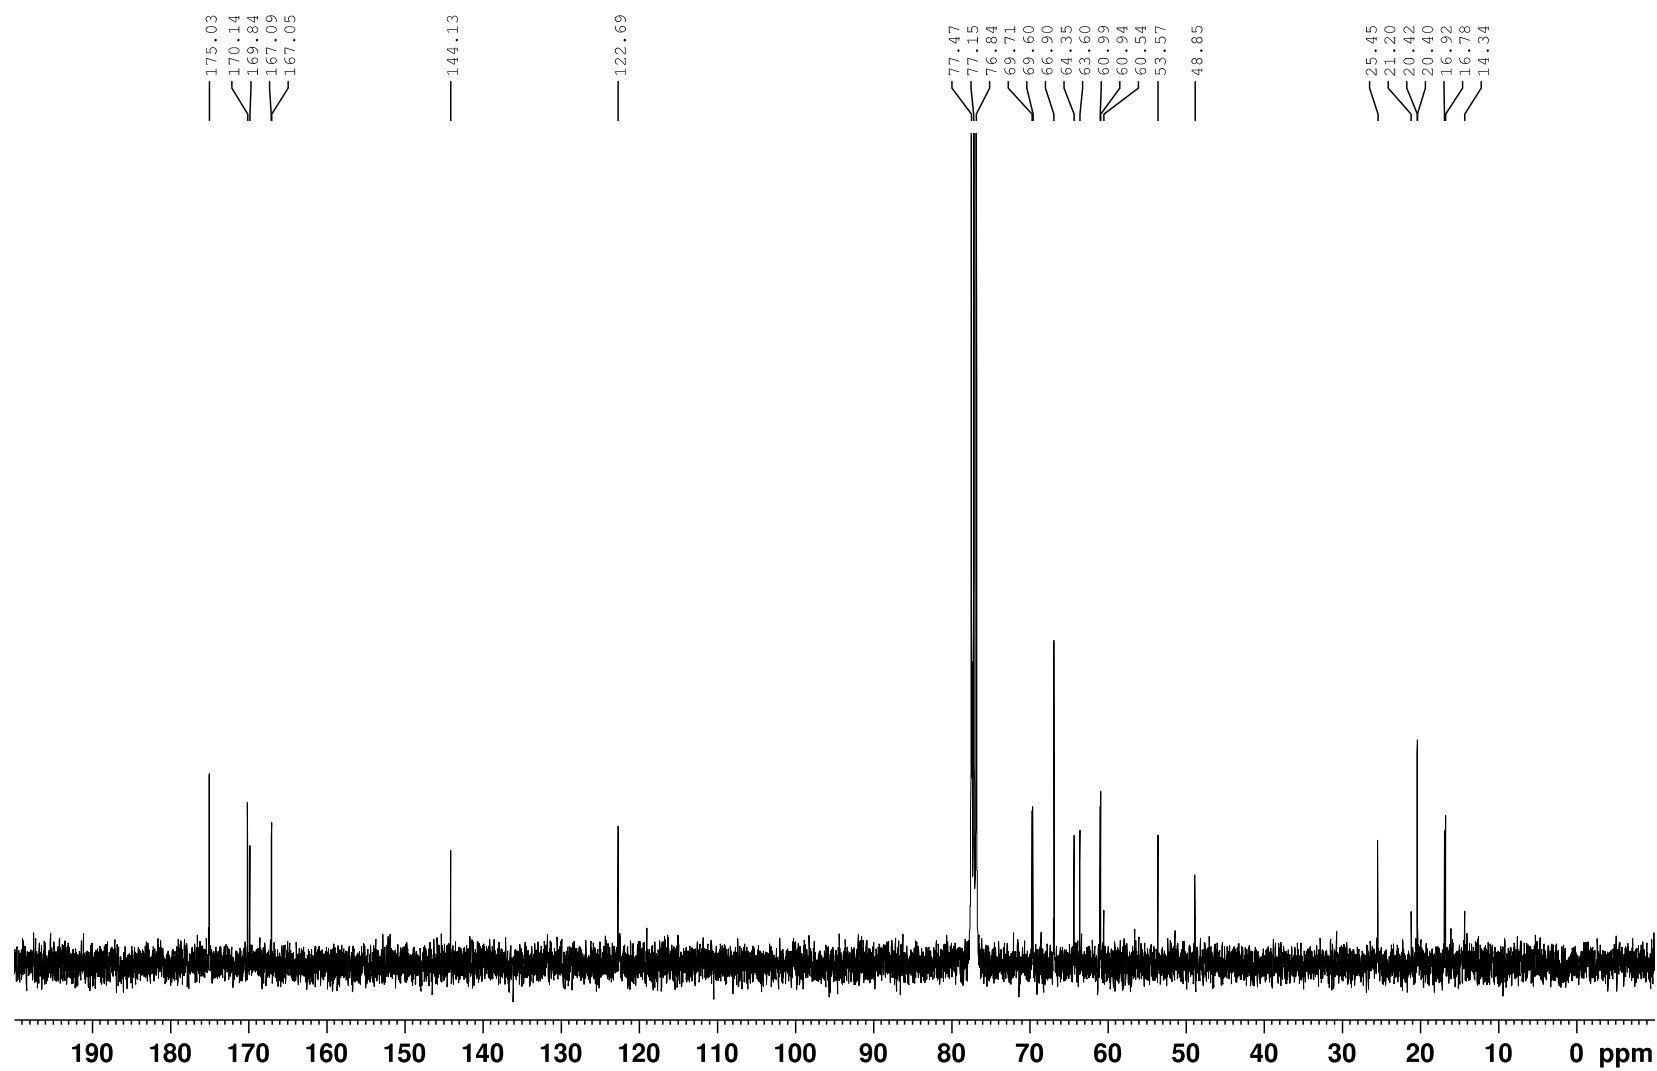

| <b>BLGL-TZ-LGLB</b>                                                                |           |      |                                                  | <sup>13</sup> C-NMR (400 MHz, CDCl <sub>3</sub> ) | HRMS (ESI)                                                     |
|------------------------------------------------------------------------------------|-----------|------|--------------------------------------------------|---------------------------------------------------|----------------------------------------------------------------|
| 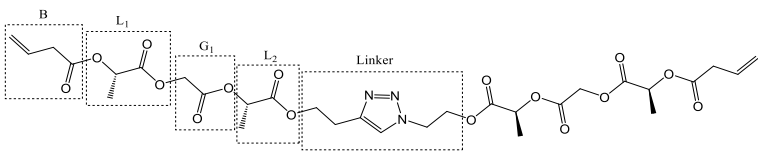 |           |      |                                                  | $\delta$ (ppm) + Assignment                       | <u>Calc. Mass</u>                                              |
|                                                                                    |           |      |                                                  | 16.75 CH <sub>3</sub>                             | 697.23 amu                                                     |
|                                                                                    |           |      |                                                  | 16.90 CH <sub>3</sub>                             |                                                                |
|                                                                                    |           |      |                                                  | 16.95 CH <sub>3</sub>                             | <u>Calc.</u>                                                   |
|                                                                                    |           |      |                                                  | 25.45 CH <sub>2</sub> (Linker)                    | [M + H] <sup>+</sup>                                           |
|                                                                                    |           |      |                                                  | 38.69 CH <sub>2</sub> (B)                         | 698.23 amu                                                     |
|                                                                                    |           |      |                                                  | 48.85 CH <sub>2</sub> (Linker)                    |                                                                |
| <sup>1</sup> H-NMR (400 MHz, CDCl <sub>3</sub> )                                   |           |      |                                                  | 60.87 CH <sub>2</sub>                             | <u>Found</u>                                                   |
| $d\delta$ (ppm)                                                                    | Mult. (J) | Int. | Assignment                                       | 63.56 CH <sub>2</sub>                             | [M + H] <sup>+</sup>                                           |
| 1.47                                                                               | m         | 6    | L <sub>1</sub> (CH <sub>3</sub> )                | 64.36 CH <sub>2</sub>                             | 698.23901                                                      |
| 1.56                                                                               | d (7.2)   | 6    | L <sub>2</sub> (CH <sub>3</sub> )                | 68.52 CH <sub>2</sub>                             | amu                                                            |
| 3.09                                                                               | m         | 2    | Linker (CH <sub>2</sub> $\alpha$ -olefin)        | 69.52 CH                                          |                                                                |
| 3.18                                                                               | m         | 4    | B (CH <sub>2</sub> $\alpha$ -carbonyl)           | 69.57 CH                                          | <u>Composition</u>                                             |
| 4.43                                                                               | m         | 2    | Linker (CH <sub>2</sub> $\alpha$ -N)             | 119.14 Olefin (B)                                 | C <sub>22</sub> H <sub>31</sub> O <sub>15</sub> N <sub>3</sub> |
| 4.54                                                                               | m         | 2    | Linker (CH <sub>2</sub> $\beta$ -olefin)         | 122.71 CH (Linker)                                |                                                                |
| 4.62                                                                               | m         | 2    | Linker (CH <sub>2</sub> $\beta$ -N)              | 129.69 CH (B)                                     |                                                                |
| 4.74                                                                               | m         | 4    | G <sub>1</sub>                                   | 144.06 C (Linker)                                 |                                                                |
| 5.13                                                                               | m         | 6    | L <sub>1</sub> (CH), L <sub>2</sub> (CH), B (CH) | 166.83 CO                                         |                                                                |
|                                                                                    |           |      |                                                  | 166.94 CO                                         |                                                                |
| 5.91                                                                               | m         | 2    | B (terminal olefin)                              | 169.74 CO                                         |                                                                |
| 7.52                                                                               | s         | 1    | Linker (olefin)                                  | 170.01 CO                                         |                                                                |
|                                                                                    |           |      |                                                  | 170.27 CO                                         |                                                                |
|                                                                                    |           |      |                                                  | 170.32 CO                                         |                                                                |
|                                                                                    |           |      |                                                  | 170.96 CO                                         |                                                                |
|                                                                                    |           |      |                                                  | 170.99 CO                                         |                                                                |

**LGL-TZ-LGL** (530 mg, 0.94 mmol, 1 eq) was dissolved in dry THF (10 mL, 0.1 M) in an oven dried vial under nitrogen. DPTS (127 mg, 0.43 mmol, 0.45 eq) and DCC (0.59 g, 2.8 mmol, 3 eq) were added sequentially. Butenoic acid (0.244 g, 2.8 mmol, 3 eq) was then added dropwise and allowed to stir at RT overnight. Upon consumption of starting material by TLC, the reaction mixture was diluted with hexanes, washed with sodium bicarbonate 3x, dried over MgSO<sub>4</sub> and filtered to remove DCU and drying agent, concentrated, and crude oil was purified via column chromatography (silica, EtOAc/hexanes) to yield a colorless oil (645 mg, 98% yield).



JHS-3034; BLGL-TZ-LGLB; CDC13; 1H; 400a;  
16 Scans; 11/21/16

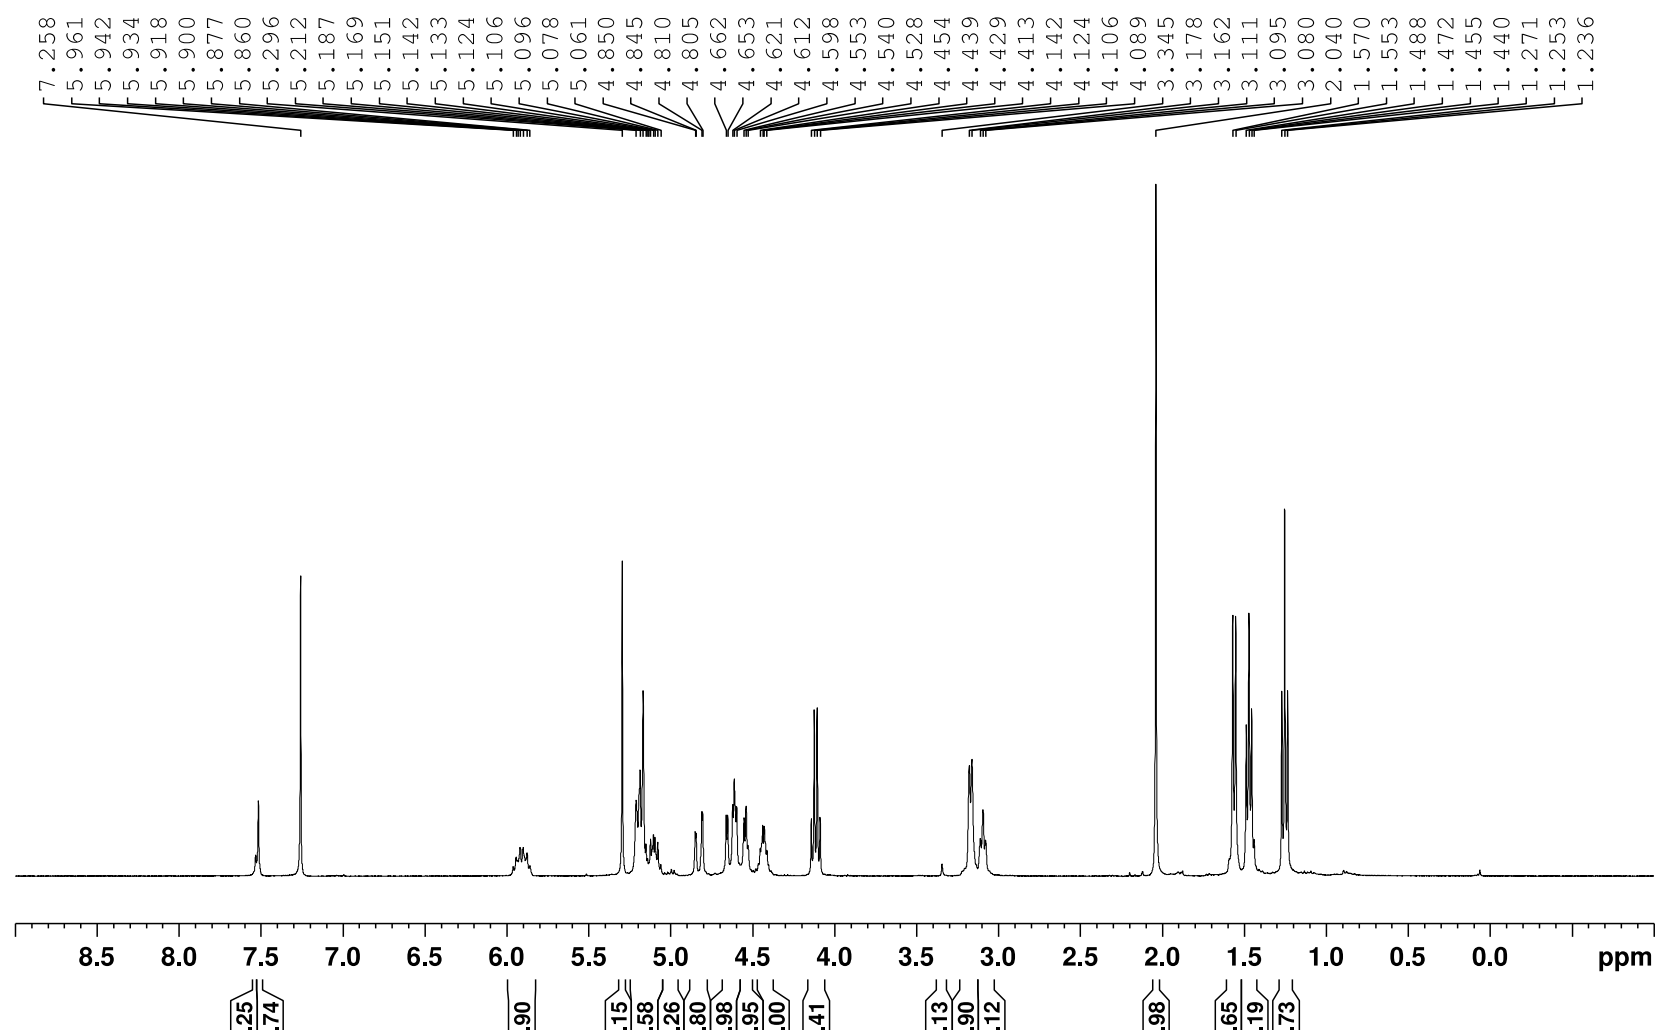

JHS-3034; BLGL-TZ-LGLB; CDC13; 13C; 400a;  
2048 Scans; 11/21/16

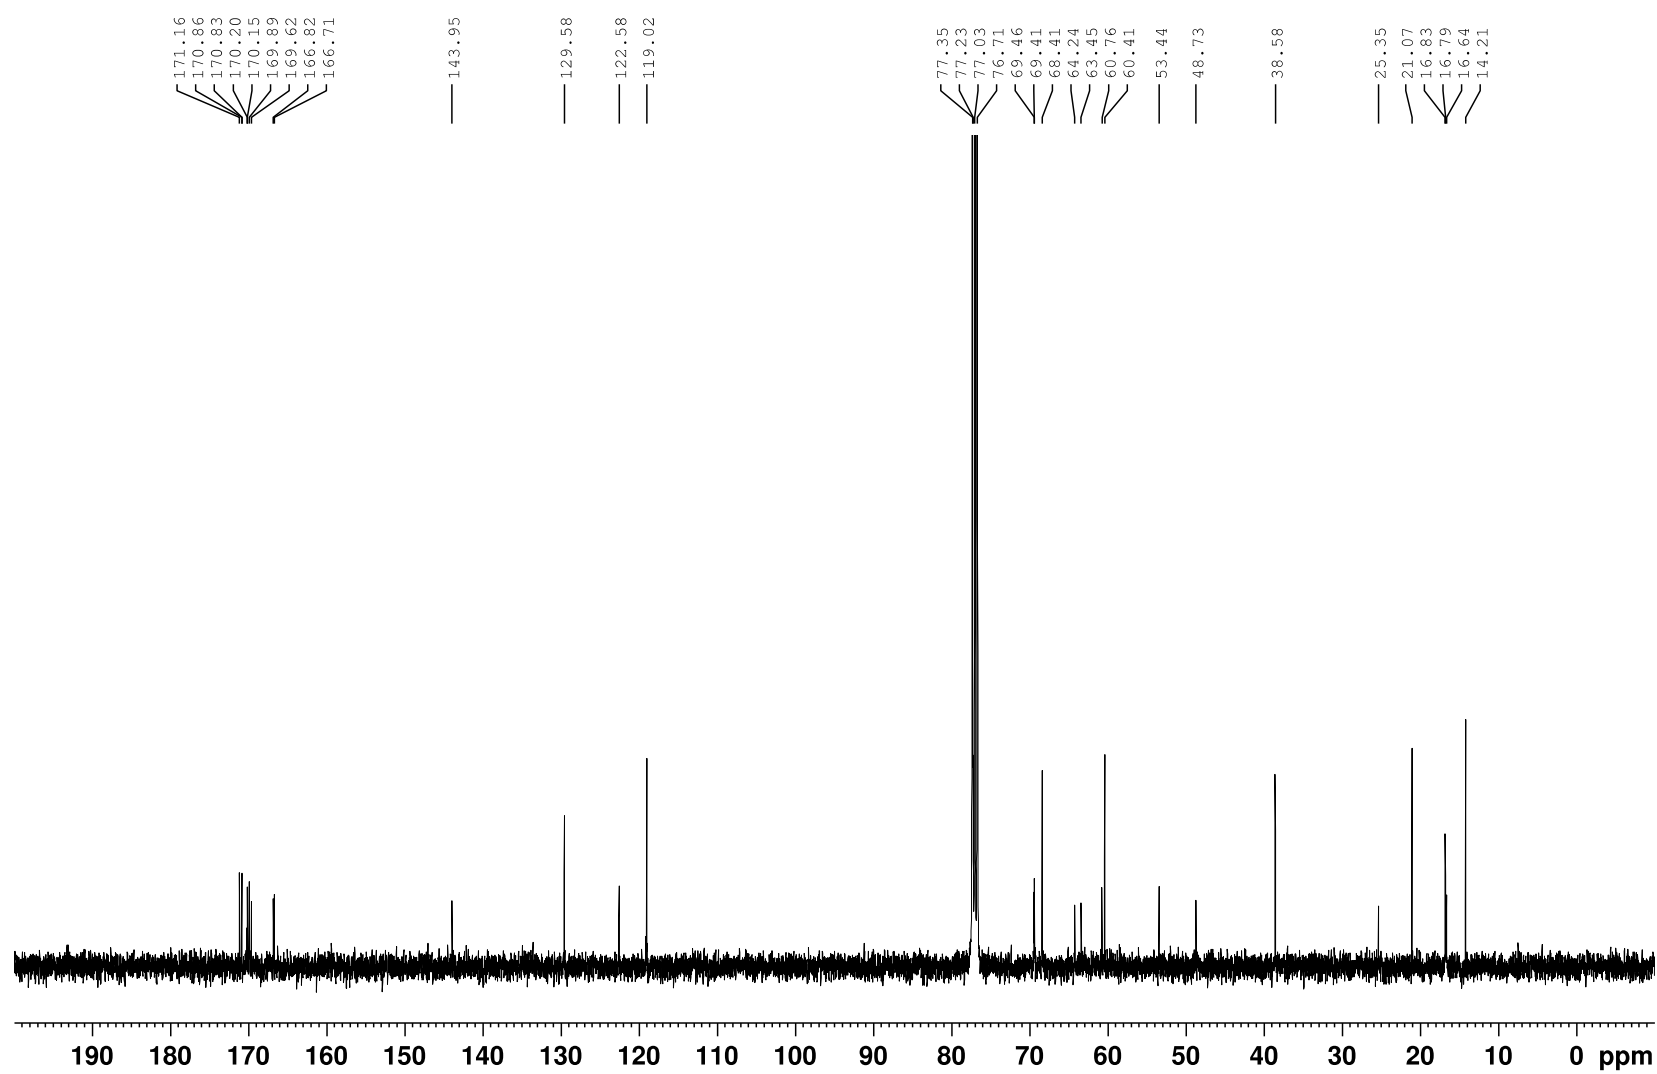

| Cyclic TZ Monomer                                                                 |           |      |                                                 | <sup>13</sup> C-NMR (400 MHz, CDCl <sub>3</sub> ) | HRMS (ESI)                                                     |
|-----------------------------------------------------------------------------------|-----------|------|-------------------------------------------------|---------------------------------------------------|----------------------------------------------------------------|
| 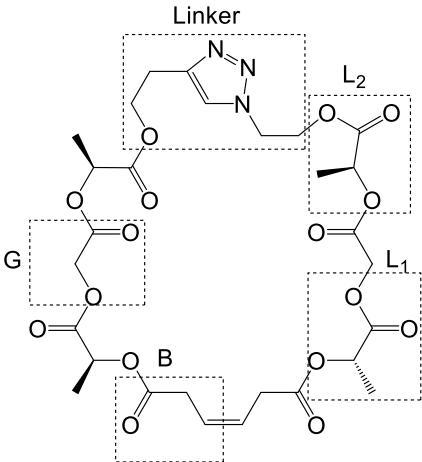 |           |      |                                                 | δ (ppm) + Assignment                              | <u>Calc. Mass</u>                                              |
|                                                                                   |           |      |                                                 | 16.71 CH <sub>3</sub>                             | 669.20 amu                                                     |
|                                                                                   |           |      |                                                 | 16.86 CH <sub>3</sub> , CH <sub>3</sub>           |                                                                |
|                                                                                   |           |      |                                                 | 16.88 CH <sub>3</sub>                             | <u>Calc.</u>                                                   |
|                                                                                   |           |      |                                                 | 25.53 CH <sub>2</sub> (Linker)                    | [M + H] <sup>+</sup>                                           |
|                                                                                   |           |      |                                                 | 37.57 CH <sub>2</sub> (B)                         | 670.20 amu                                                     |
|                                                                                   |           |      |                                                 | 48.88 CH <sub>2</sub> (Linker)                    |                                                                |
|                                                                                   |           |      |                                                 | 60.98 CH <sub>2</sub>                             | <u>Found</u>                                                   |
|                                                                                   |           |      |                                                 | 61.00 CH <sub>2</sub>                             | [M + H] <sup>+</sup>                                           |
|                                                                                   |           |      |                                                 | 63.72 CH <sub>2</sub>                             | 670.20783 amu                                                  |
|                                                                                   |           |      |                                                 | 64.41 CH <sub>2</sub>                             |                                                                |
|                                                                                   |           |      |                                                 | 68.61 CH                                          | <u>Composition</u>                                             |
|                                                                                   |           |      |                                                 | 68.65 CH                                          | C <sub>28</sub> H <sub>35</sub> O <sub>16</sub> N <sub>3</sub> |
|                                                                                   |           |      |                                                 | 69.65 CH                                          |                                                                |
|                                                                                   |           |      |                                                 | 69.68 CH                                          |                                                                |
|                                                                                   |           |      |                                                 | 123.07 CH (Cis)                                   |                                                                |
|                                                                                   |           |      |                                                 | 124.73 CH                                         |                                                                |
|                                                                                   |           |      |                                                 | 125.79 CH                                         |                                                                |
|                                                                                   |           |      |                                                 | 125.80 CH                                         |                                                                |
|                                                                                   |           |      |                                                 | 144.17 C                                          |                                                                |
|                                                                                   |           |      |                                                 | 166.74 CO                                         |                                                                |
|                                                                                   |           |      |                                                 | 166.94 CO                                         |                                                                |
|                                                                                   |           |      |                                                 | 169.79 CO                                         |                                                                |
|                                                                                   |           |      |                                                 | 170.02 CO                                         |                                                                |
|                                                                                   |           |      |                                                 | 170.10 CO                                         |                                                                |
|                                                                                   |           |      |                                                 | 170.20 CO                                         |                                                                |
|                                                                                   |           |      |                                                 | 170.44 CO                                         |                                                                |
|                                                                                   |           |      |                                                 | 170.67 CO                                         |                                                                |
| <sup>1</sup> H-NMR (400 MHz, CDCl <sub>3</sub> )                                  |           |      |                                                 |                                                   |                                                                |
| dδ (ppm)                                                                          | Mult. (J) | Int. | Assignment                                      |                                                   |                                                                |
| 1.47                                                                              | m         | 6    | L <sub>1</sub> (CH <sub>3</sub> )               |                                                   |                                                                |
| 1.54                                                                              | d (7.2)   | 6    | L <sub>2</sub> (CH <sub>3</sub> )               |                                                   |                                                                |
| 3.13                                                                              | m         | 6    | Linker (CH <sub>2</sub> ), B (CH <sub>2</sub> ) |                                                   |                                                                |
| 4.43                                                                              | m         | 1    | Linker (CH <sub>2</sub> )                       |                                                   |                                                                |
| 4.49                                                                              | m         | 3    | Linker (CH <sub>2</sub> , CH <sub>2</sub> )     |                                                   |                                                                |
| 4.62                                                                              | m         | 3    | Linker (CH <sub>2</sub> , CH <sub>2</sub> )     |                                                   |                                                                |
| 4.72                                                                              | m         | 4    | G                                               |                                                   |                                                                |
| 5.09                                                                              | m         | 6    | L <sub>1</sub> (CH)                             |                                                   |                                                                |
| 5.20                                                                              | m         | 2    | L <sub>2</sub> (CH)                             |                                                   |                                                                |
| 5.77                                                                              | m         | 2    | B (CH)                                          |                                                   |                                                                |
| 7.60                                                                              | s         | 1    | Linker (olefin)                                 |                                                   |                                                                |

**BLGL-TZ-LGLB** (640 mg, 0.92 mmol, 1 eq) was dissolved in dry DCM (920 mL, 0.001M) in a flame-dried Schlenk flask under nitrogen. A stock solution of Grubbs 2 (117 mg, 0.14 mmol, 15 mol%) in dry DCM was added and allowed to stir at RT overnight. Upon consumption of starting material by TLC, reaction mixture was quenched by addition of excess ethyl vinyl ether and stirring for 10 additional min. The reaction mixture was then concentrated and the crude solid was purified via column chromatography (silica, EtOAc/hexanes) to yield a thick brown oil (376 mg, 61% yield).

JHS-3035; TZ Monomer; CDC13; 1H; 400a;  
16 Scans; 12/2/16

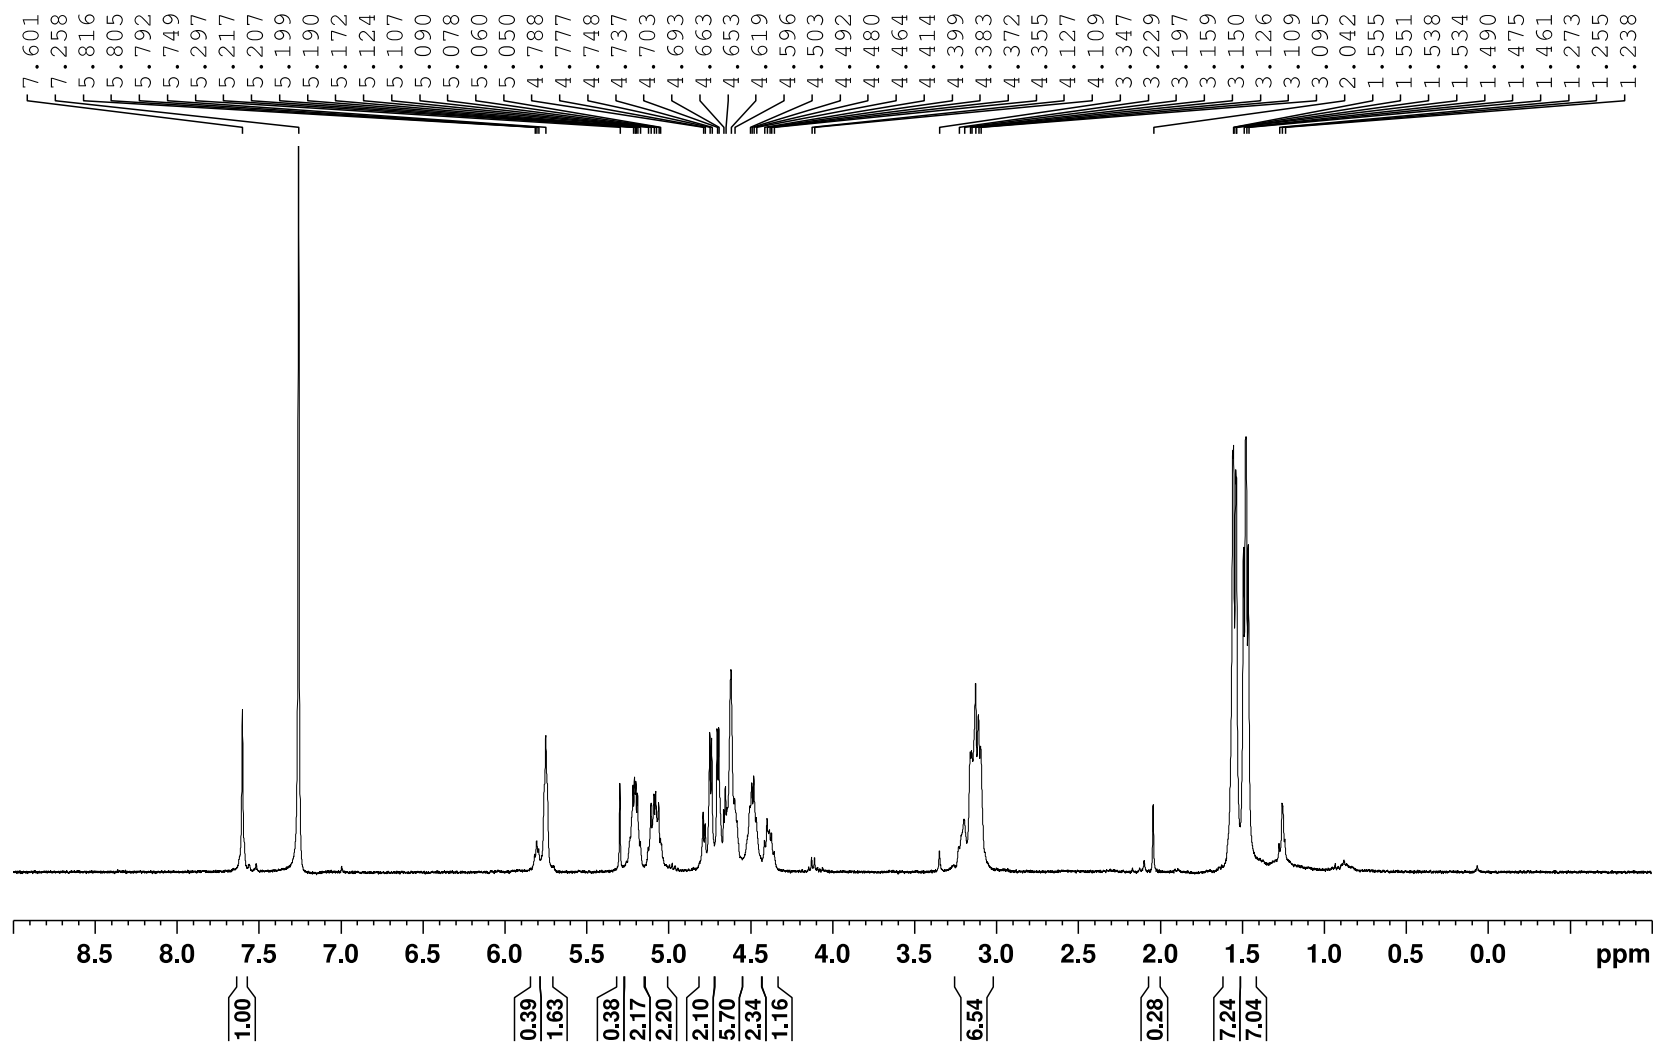

JHS-3003; TZ Mon; CDC13; 1H;  
500; 16 Scans; 7/19/17

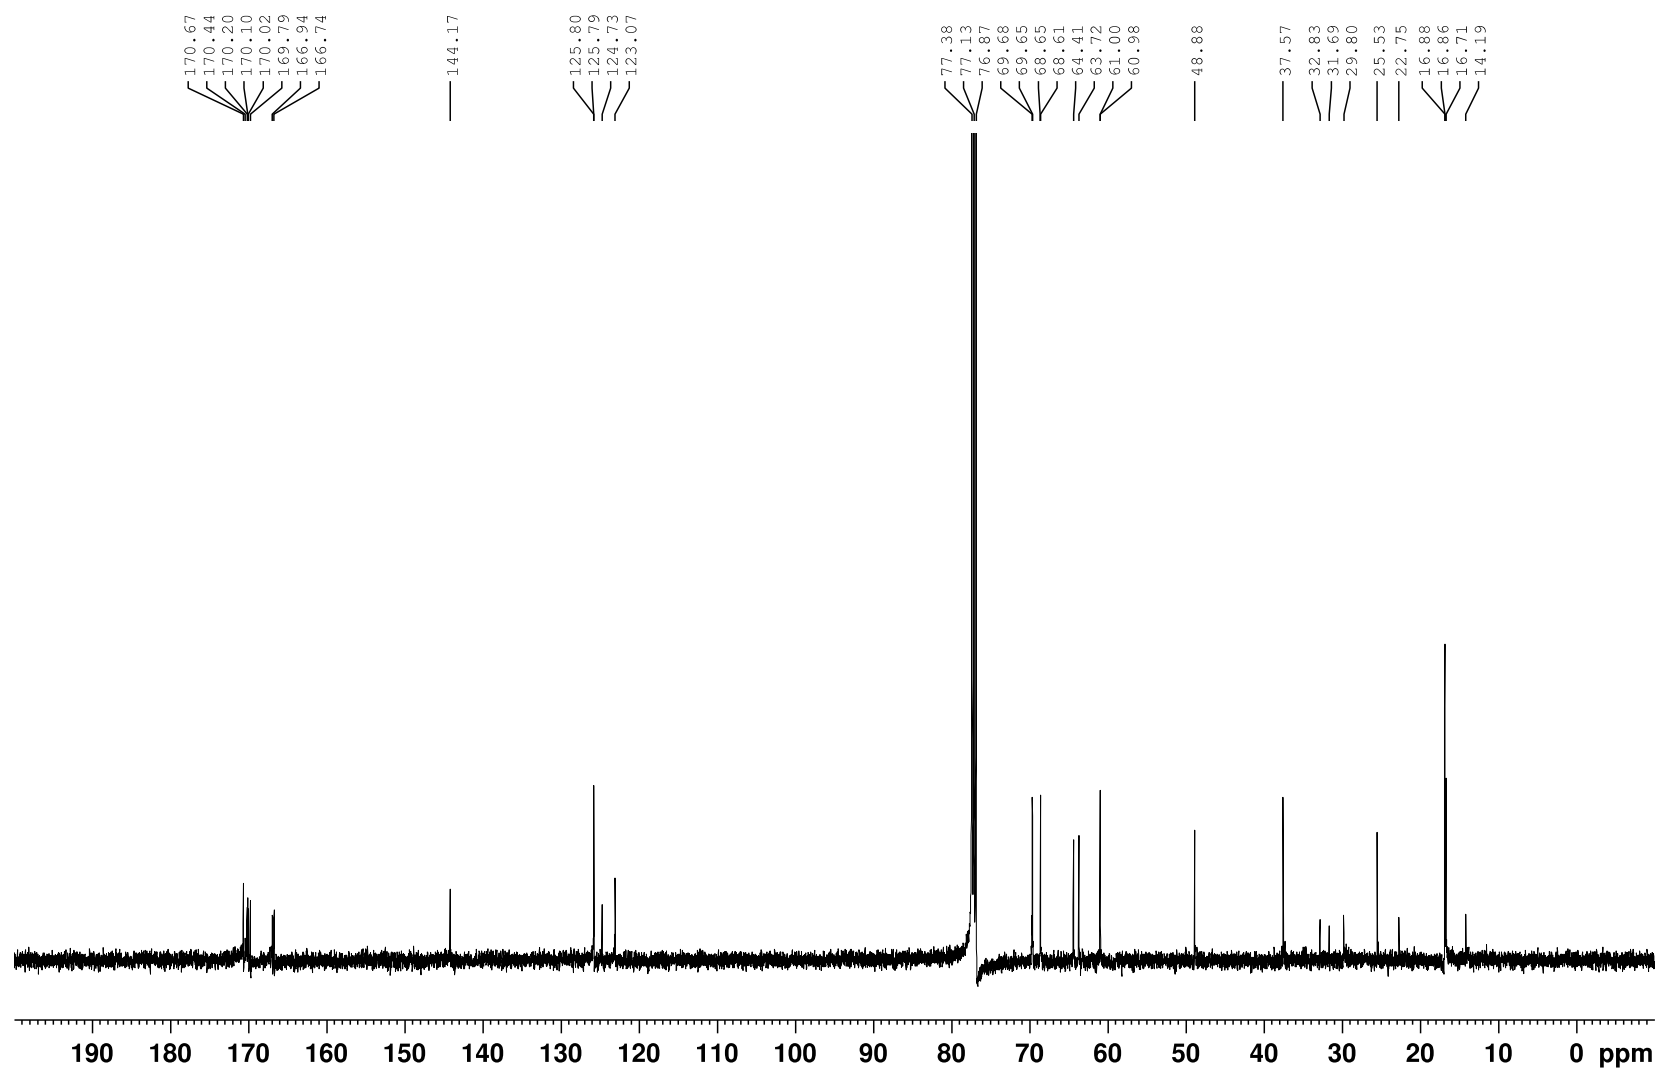

| <b>Poly(TZ)</b>                                                                    |           |      |                                           | <sup>13</sup> C-NMR (500 MHz, CDCl <sub>3</sub> )                                                                                                                                                                                                                                                                                                                                                                                                                                                                                                                                                                                         |  | HRMS (ESI)                |
|------------------------------------------------------------------------------------|-----------|------|-------------------------------------------|-------------------------------------------------------------------------------------------------------------------------------------------------------------------------------------------------------------------------------------------------------------------------------------------------------------------------------------------------------------------------------------------------------------------------------------------------------------------------------------------------------------------------------------------------------------------------------------------------------------------------------------------|--|---------------------------|
| 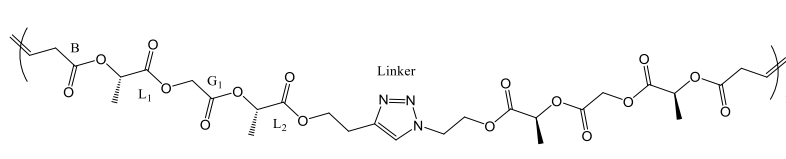 |           |      |                                           | $\delta$ (ppm) + Assignment                                                                                                                                                                                                                                                                                                                                                                                                                                                                                                                                                                                                               |  | $M_n$                     |
|                                                                                    |           |      |                                           | 16.64 CH <sub>3</sub> (L)<br>16.78 CH <sub>3</sub> (L)<br>16.82 CH <sub>3</sub> (L)<br>25.34 CH <sub>2</sub> (Linker)<br>32.64 CH <sub>2</sub> (Linker)<br>37.25 CH <sub>2</sub> (Linker)<br>48.74 CH <sub>2</sub> (Linker)<br>60.76 CH <sub>2</sub> (G <sub>1</sub> )<br>60.78 CH <sub>2</sub> (G <sub>1</sub> )<br>63.43 CH <sub>2</sub> (B)<br>64.2 CH <sub>2</sub> (B)<br>68.47 CH (L)<br>68.55 CH (L)<br>69.38 CH (L)<br>69.46 CH (L)<br>122.54 CH (Linker)<br>124.29 CH (B Cis)<br>125.71 CH (B Trans)<br>143.91 C (Linker)<br>166.70 CO<br>166.79 CO<br>169.58 CO<br>169.86 CO<br>170.09 CO<br>170.14 CO<br>170.75 CO<br>170.76 CO |  | 9,973 Da<br><br>D<br>1.60 |
| <sup>1</sup> H-NMR (400 MHz, CDCl <sub>3</sub> )                                   |           |      |                                           |                                                                                                                                                                                                                                                                                                                                                                                                                                                                                                                                                                                                                                           |  |                           |
| $\delta$ (ppm)                                                                     | Mult. (J) | Int. | Assignment                                |                                                                                                                                                                                                                                                                                                                                                                                                                                                                                                                                                                                                                                           |  |                           |
| 1.47                                                                               | m         | 6    | CH <sub>3</sub> (L)                       |                                                                                                                                                                                                                                                                                                                                                                                                                                                                                                                                                                                                                                           |  |                           |
| 1.55                                                                               | d (6.8)   | 6    | CH <sub>3</sub> (L)                       |                                                                                                                                                                                                                                                                                                                                                                                                                                                                                                                                                                                                                                           |  |                           |
| 3.08                                                                               | t (7.6)   | 2    | CH <sub>2</sub> (Linker)                  |                                                                                                                                                                                                                                                                                                                                                                                                                                                                                                                                                                                                                                           |  |                           |
| 3.17                                                                               | m         | 4    | CH <sub>2</sub> (B)                       |                                                                                                                                                                                                                                                                                                                                                                                                                                                                                                                                                                                                                                           |  |                           |
| 4.43                                                                               | t (6.3)   | 2    | CH <sub>2</sub> (Linker)                  |                                                                                                                                                                                                                                                                                                                                                                                                                                                                                                                                                                                                                                           |  |                           |
| 4.54                                                                               | m         | 2    | CH <sub>2</sub> (Linker)                  |                                                                                                                                                                                                                                                                                                                                                                                                                                                                                                                                                                                                                                           |  |                           |
| 4.63                                                                               | m         | 4    | CH <sub>2</sub> (G <sub>1</sub> , Linker) |                                                                                                                                                                                                                                                                                                                                                                                                                                                                                                                                                                                                                                           |  |                           |
| 4.83                                                                               | m         | 2    | CH <sub>2</sub> (G <sub>1</sub> )         |                                                                                                                                                                                                                                                                                                                                                                                                                                                                                                                                                                                                                                           |  |                           |
| 5.13                                                                               | m         | 4    | CH (L <sub>1/2</sub> )                    |                                                                                                                                                                                                                                                                                                                                                                                                                                                                                                                                                                                                                                           |  |                           |
| 5.70                                                                               | m         | 1.6  | CH (B Trans)                              |                                                                                                                                                                                                                                                                                                                                                                                                                                                                                                                                                                                                                                           |  |                           |
| 5.79                                                                               | m         | 0.4  | CH (B Cis)                                |                                                                                                                                                                                                                                                                                                                                                                                                                                                                                                                                                                                                                                           |  |                           |
| 7.52                                                                               | s         | 1    | CH (Linker)                               |                                                                                                                                                                                                                                                                                                                                                                                                                                                                                                                                                                                                                                           |  |                           |

**Cyclic TZ Monomer** (235 mg, 0.35 mmol, 1 eq.) was weighed in a flame dried 1 mL vial under nitrogen. A stock solution of Grubbs II (14.9 mg, 0.0185 mmol, 5 mol%) in dry THF (42.6 mg/mL, 0.35 mL, 1 M) was added and the vial was stirred at 60°C for 4 h. The reaction mixture was quenched by the addition of excess ethyl vinyl ether and vortexing. Solution was concentrated to yield a crude solid polymer, which was reprecipitated into a stirring solution of MeOH and filtered to collect pure polymer as a brown solid (160 mg, 68% yield).

JHS-4061; Poly(TZ) Pure; CDCl<sub>3</sub>; 1H; 400a;  
16 Scans; 7/31/17

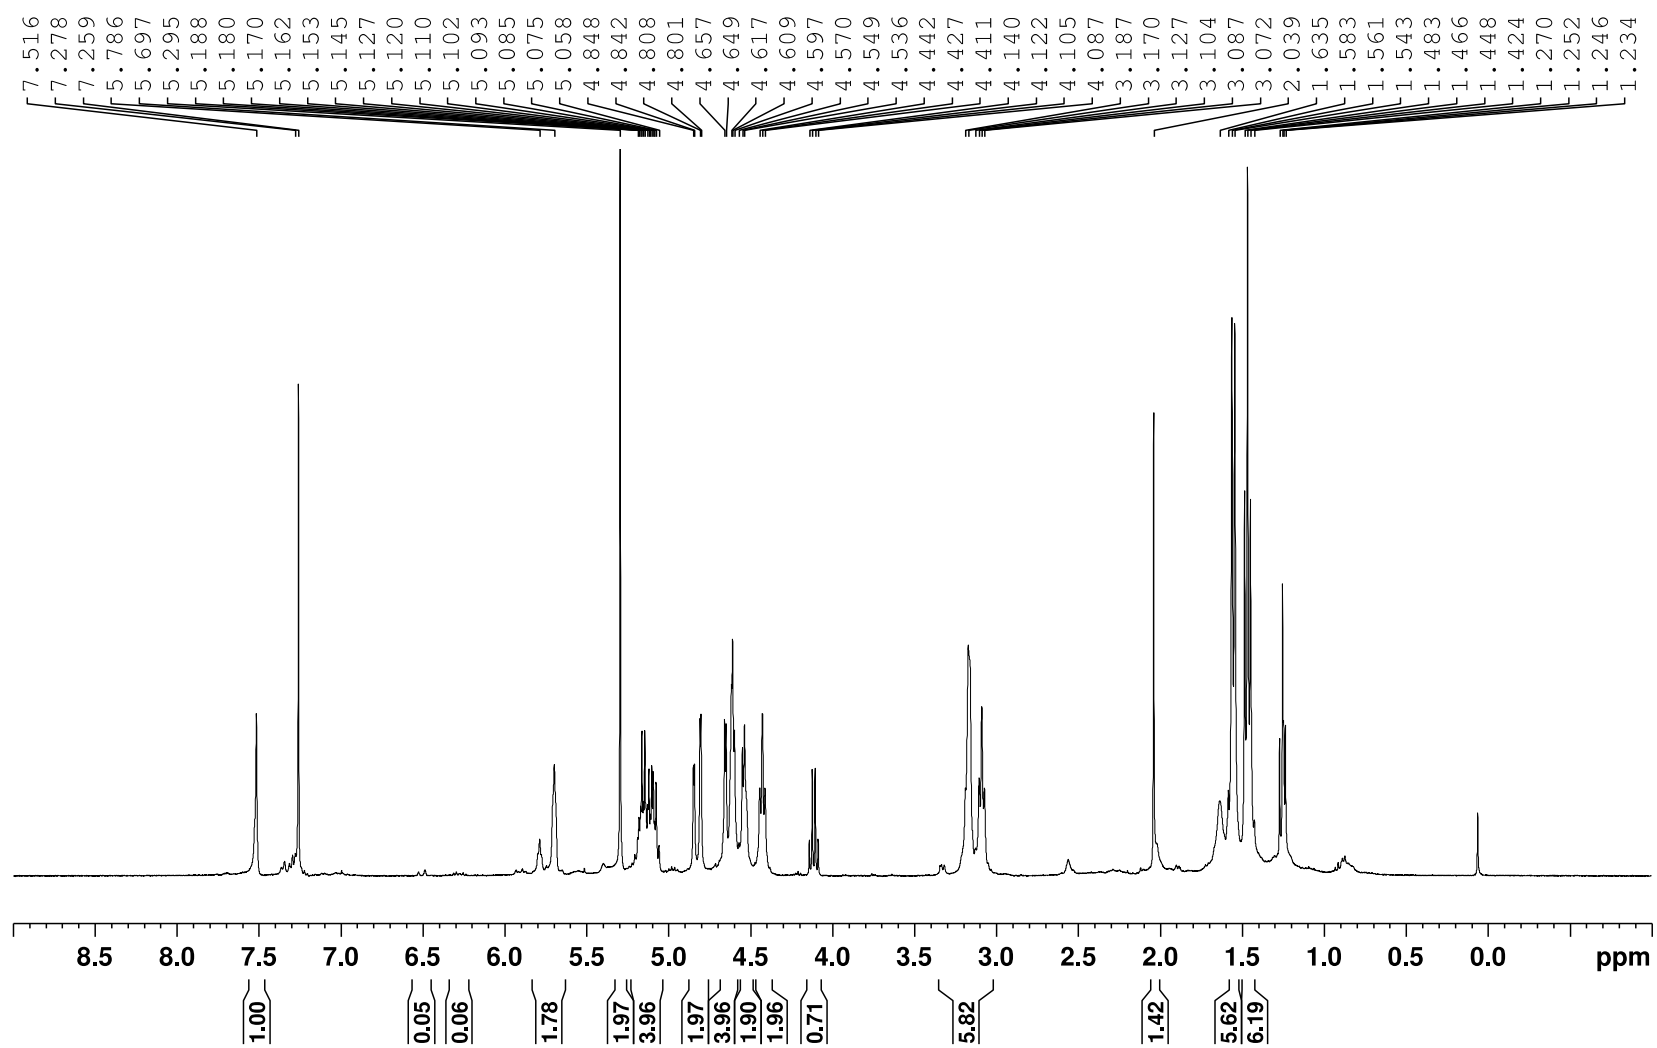

JHS-4061; Poly(TZ); CDCl<sub>3</sub>; 13C; 500; 64 Scans;  
10/27/17

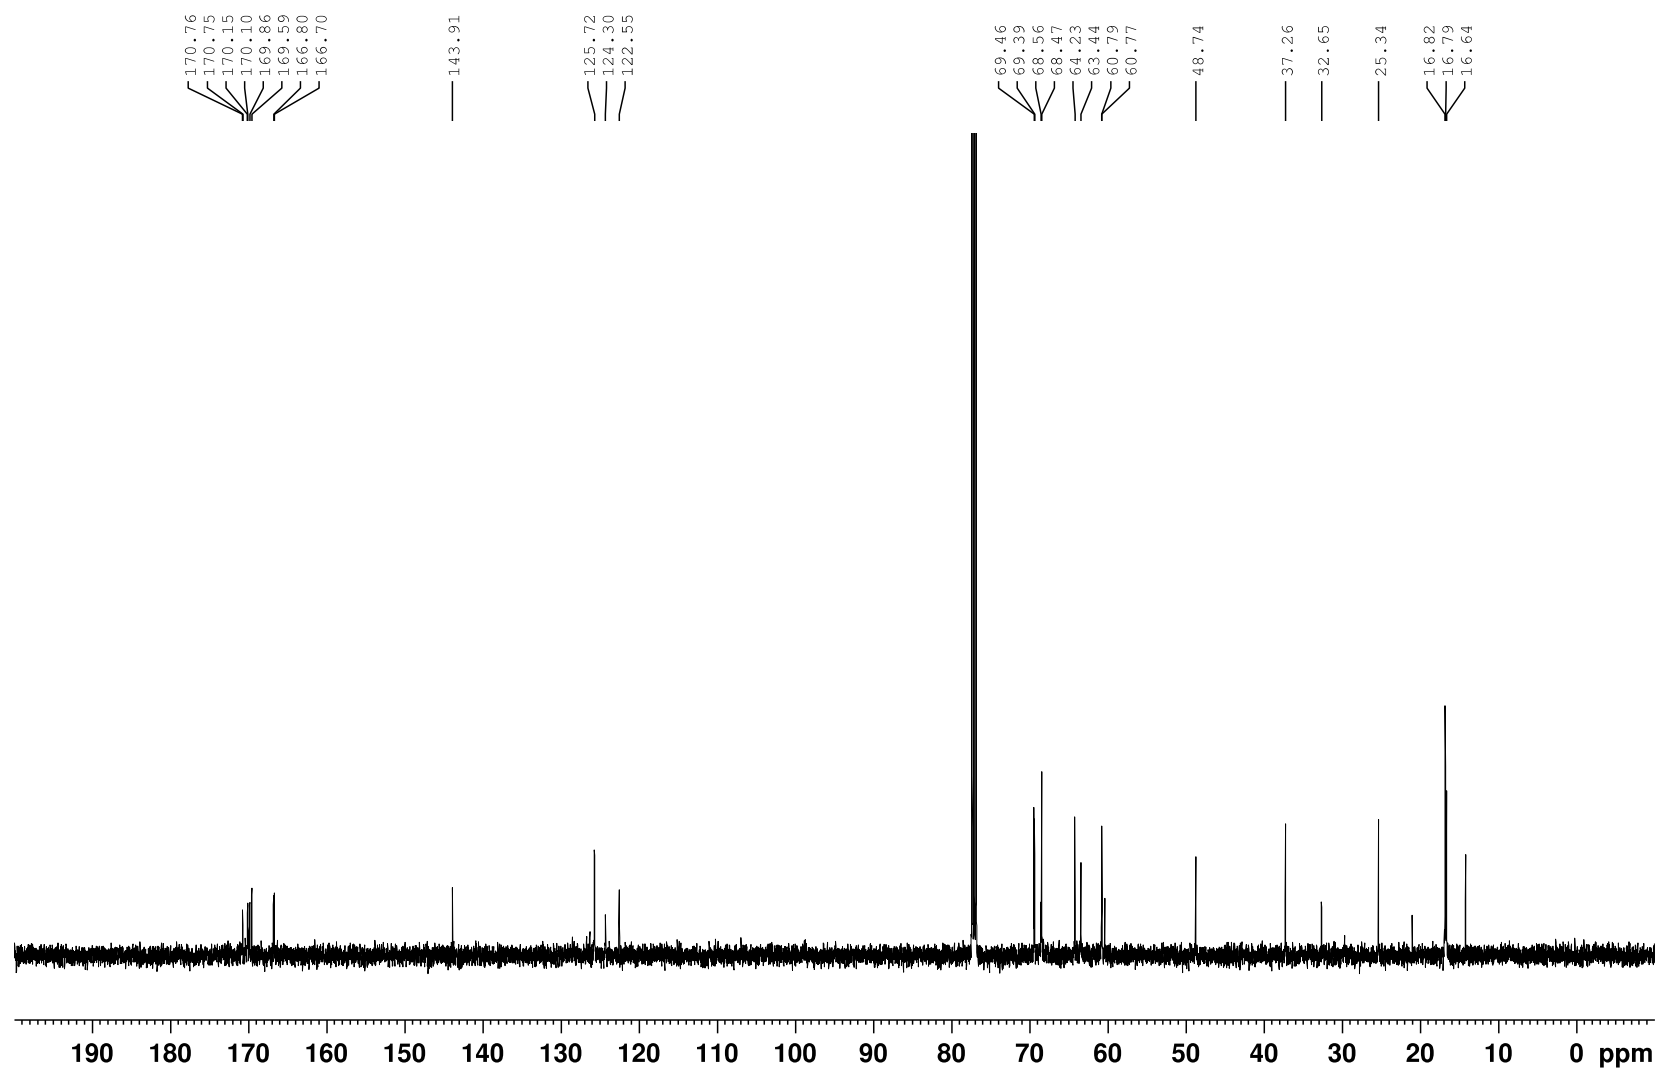

## 2.8 SY LINKER CONTAINING COMPOUNDS AND PRECURSORS

| Bn-Syringic Acid                                                                   |                                                       |                                                                      |  | <sup>13</sup> C-NMR (400 MHz, CDCl <sub>3</sub> ) | HRMS (ESI)                                         |
|------------------------------------------------------------------------------------|-------------------------------------------------------|----------------------------------------------------------------------|--|---------------------------------------------------|----------------------------------------------------|
| 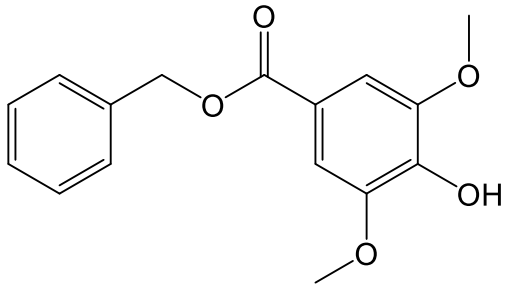 |                                                       |                                                                      |  | $\delta$ (ppm) +<br>Assignment                    | <u>Calc. Mass</u><br>288.10 amu                    |
|                                                                                    |                                                       |                                                                      |  | 56.48 CH <sub>3</sub>                             | <u>Calc.</u><br>[M + H] <sup>+</sup><br>289.10 amu |
| 66.69 CH <sub>2</sub>                                                              | <u>Found</u><br>[M + H] <sup>+</sup><br>289.10803 amu |                                                                      |  |                                                   |                                                    |
| 106.78 Aromatic                                                                    |                                                       | <u>Composition</u><br>C <sub>16</sub> H <sub>17</sub> O <sub>5</sub> |  |                                                   |                                                    |
| 121.08 Aromatic                                                                    |                                                       |                                                                      |  |                                                   |                                                    |
| 128.21 Aromatic                                                                    |                                                       |                                                                      |  |                                                   |                                                    |
| 128.24 Aromatic                                                                    |                                                       |                                                                      |  |                                                   |                                                    |
| 128.62 Aromatic                                                                    |                                                       |                                                                      |  |                                                   |                                                    |
| 136.24 Aromatic                                                                    |                                                       |                                                                      |  |                                                   |                                                    |
| 139.32 Aromatic                                                                    |                                                       |                                                                      |  |                                                   |                                                    |
| 146.63 Aromatic                                                                    |                                                       |                                                                      |  |                                                   |                                                    |
| 166.27 CO                                                                          |                                                       |                                                                      |  |                                                   |                                                    |

  

| <sup>1</sup> H-NMR (400 MHz, CDCl <sub>3</sub> ) |           |      |                 |
|--------------------------------------------------|-----------|------|-----------------|
| d $\delta$ (ppm)                                 | Mult. (J) | Int. | Assignment      |
| 3.93                                             | s         | 6    | CH <sub>3</sub> |
| 5.36                                             | s         | 2    | CH <sub>2</sub> |
| 5.90                                             | s         | 1    | OH              |
| 7.39                                             | m         | 7    | Aromatic        |

Syringic acid (10 g, 0.051 mol, 1.1 eq) and potassium carbonate (7.01 g, 0.051 mol, 1.1 eq) were dissolved in dry DMF (200 mL, 0.25 M) in a flame-dried Schlenk flask under nitrogen and allowed to stir at RT for 1 h. BnBr (7.885 g, 0.046 mol, 1 eq) was added to the flask and allowed to stir at RT overnight. Upon consumption of starting material by TLC, the reaction mixture was diluted with water, washed with EtOAc 3x, combined organic layer was washed with sodium bicarbonate 3x, dried over MgSO<sub>4</sub> and concentrated to yield a white solid (9.89 g, 68% yield).

JHS-3013; Bn-Sy; CDC13; 1H; 400a; 16 Scans;  
10/5/16

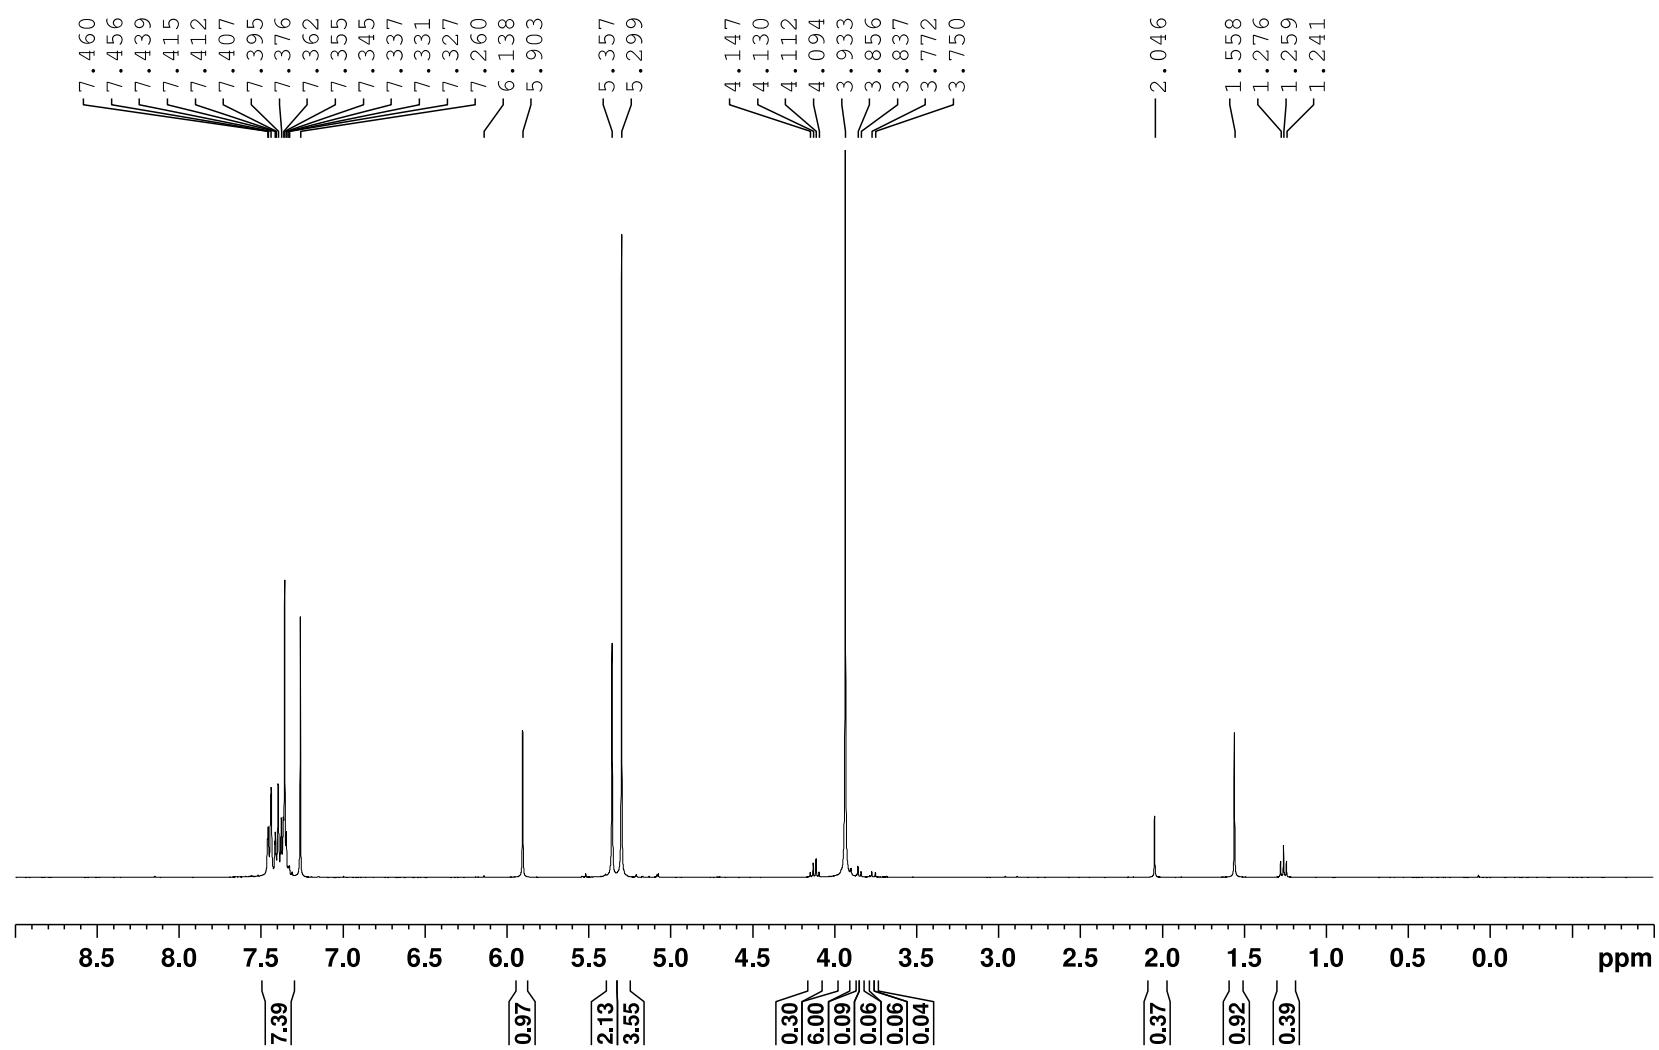

JHS-3013; Bn-Sy; CDC13; 13C; 400a; 2048 Scans;  
10/5/16

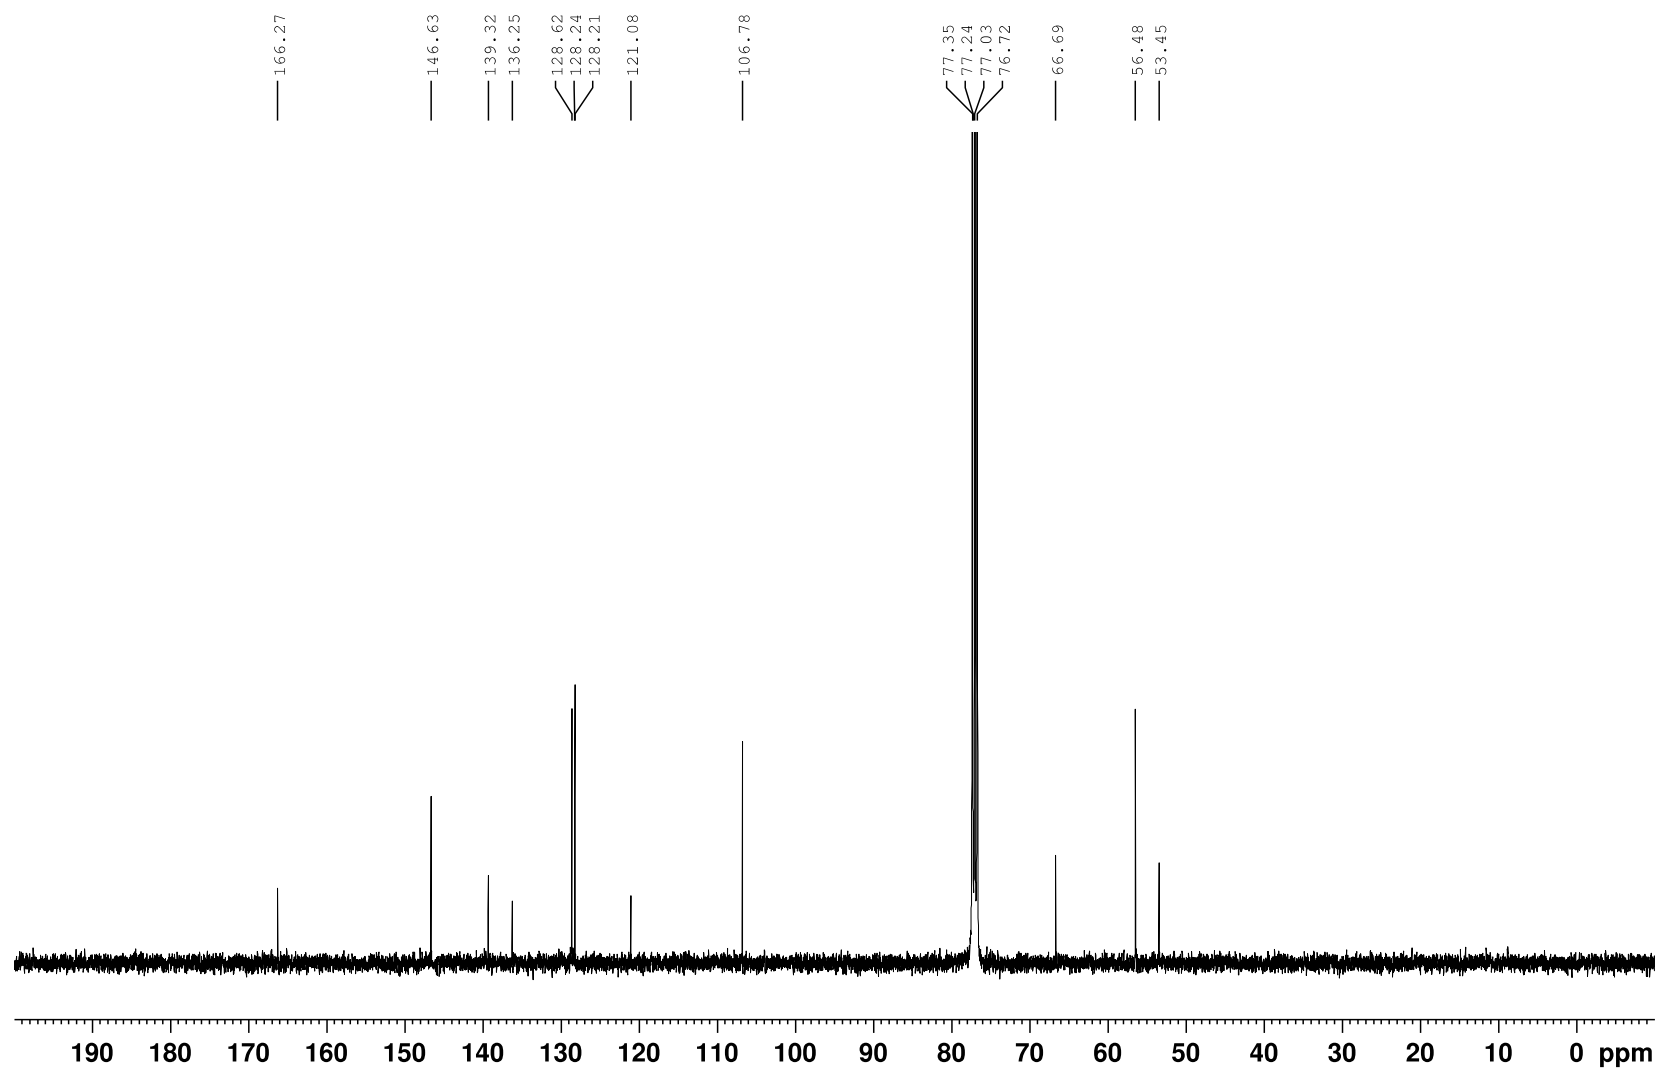

| <b>Bn-Syringic Acid-Si</b>                                                         |           |            |                                                   |                                                   |
|------------------------------------------------------------------------------------|-----------|------------|---------------------------------------------------|---------------------------------------------------|
| 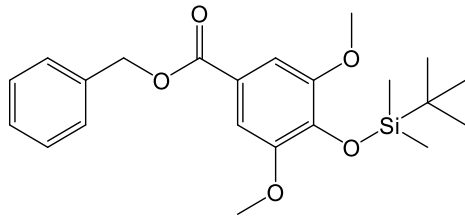 |           |            | <sup>13</sup> C-NMR (400 MHz, CDCl <sub>3</sub> ) | HRMS (ESI)                                        |
|                                                                                    |           |            | δ (ppm) + Assignment                              | Calc. Mass<br>402.19 amu                          |
| <sup>1</sup> H-NMR (400 MHz, CDCl <sub>3</sub> )                                   |           |            |                                                   |                                                   |
| dδ (ppm)                                                                           | Mult. (J) | Assignment |                                                   |                                                   |
|                                                                                    |           | Int.       |                                                   |                                                   |
| 0.14                                                                               | s         | 6          | CH <sub>3</sub>                                   |                                                   |
| 1.00                                                                               | s         | 9          | CH <sub>3</sub>                                   |                                                   |
| 3.83                                                                               | s         | 6          | CH <sub>3</sub>                                   |                                                   |
| 5.35                                                                               | s         | 2          | CH <sub>2</sub>                                   |                                                   |
| 7.39                                                                               | m         | 7          | Aromatic                                          |                                                   |
|                                                                                    |           |            |                                                   | -4.50 CH <sub>3</sub> (Si)                        |
|                                                                                    |           |            |                                                   | 18.88 C (Si)                                      |
|                                                                                    |           |            |                                                   | 25.82 CH <sub>3</sub> (Si)                        |
|                                                                                    |           |            |                                                   | 55.93 CH <sub>3</sub>                             |
|                                                                                    |           |            |                                                   | 66.71 CH <sub>2</sub>                             |
|                                                                                    |           |            |                                                   | 107.01 Aromatic                                   |
|                                                                                    |           |            |                                                   | 122.28 Aromatic                                   |
|                                                                                    |           |            |                                                   | 128.29 Aromatic                                   |
|                                                                                    |           |            |                                                   | 128.31 Aromatic                                   |
|                                                                                    |           |            |                                                   | 128.69 Aromatic                                   |
|                                                                                    |           |            |                                                   | 136.41 Aromatic                                   |
|                                                                                    |           |            |                                                   | 139.26 Aromatic                                   |
|                                                                                    |           |            |                                                   | 151.38 Aromatic                                   |
|                                                                                    |           |            |                                                   | 166.54 CO                                         |
|                                                                                    |           |            |                                                   | Found                                             |
|                                                                                    |           |            |                                                   | [M + H] <sup>+</sup>                              |
|                                                                                    |           |            |                                                   | 403.19536                                         |
|                                                                                    |           |            |                                                   | amu                                               |
|                                                                                    |           |            |                                                   | Composition                                       |
|                                                                                    |           |            |                                                   | C <sub>22</sub> H <sub>31</sub> O <sub>5</sub> Si |

**Bn-Syringic Acid** (9.8 g, 34.3 mmol, 1 eq) and imidazole (2.34 g, 34.3 mmol, 1 eq) were dissolved in DMF (0.1 M, 300 mL) in a flame dried Schlenk flask under nitrogen and allowed to stir for 5 min. Tert-butyldimethylsilyl chloride (5.45 g, 36 mmol, 1.05 eq) was added and was allowed to stir at RT overnight. Upon consumption of starting material by TLC, the reaction mixture was diluted with brine, washed with EtOAc 3x, and combined organic layers were dried over MgSO<sub>4</sub> and concentrated to yield a white solid (9.2 g, 67% yield).



JHS-3014; Bn-Sy-Si; CDCl<sub>3</sub>; 1H; 400a; 16 Scans;  
10/6/16

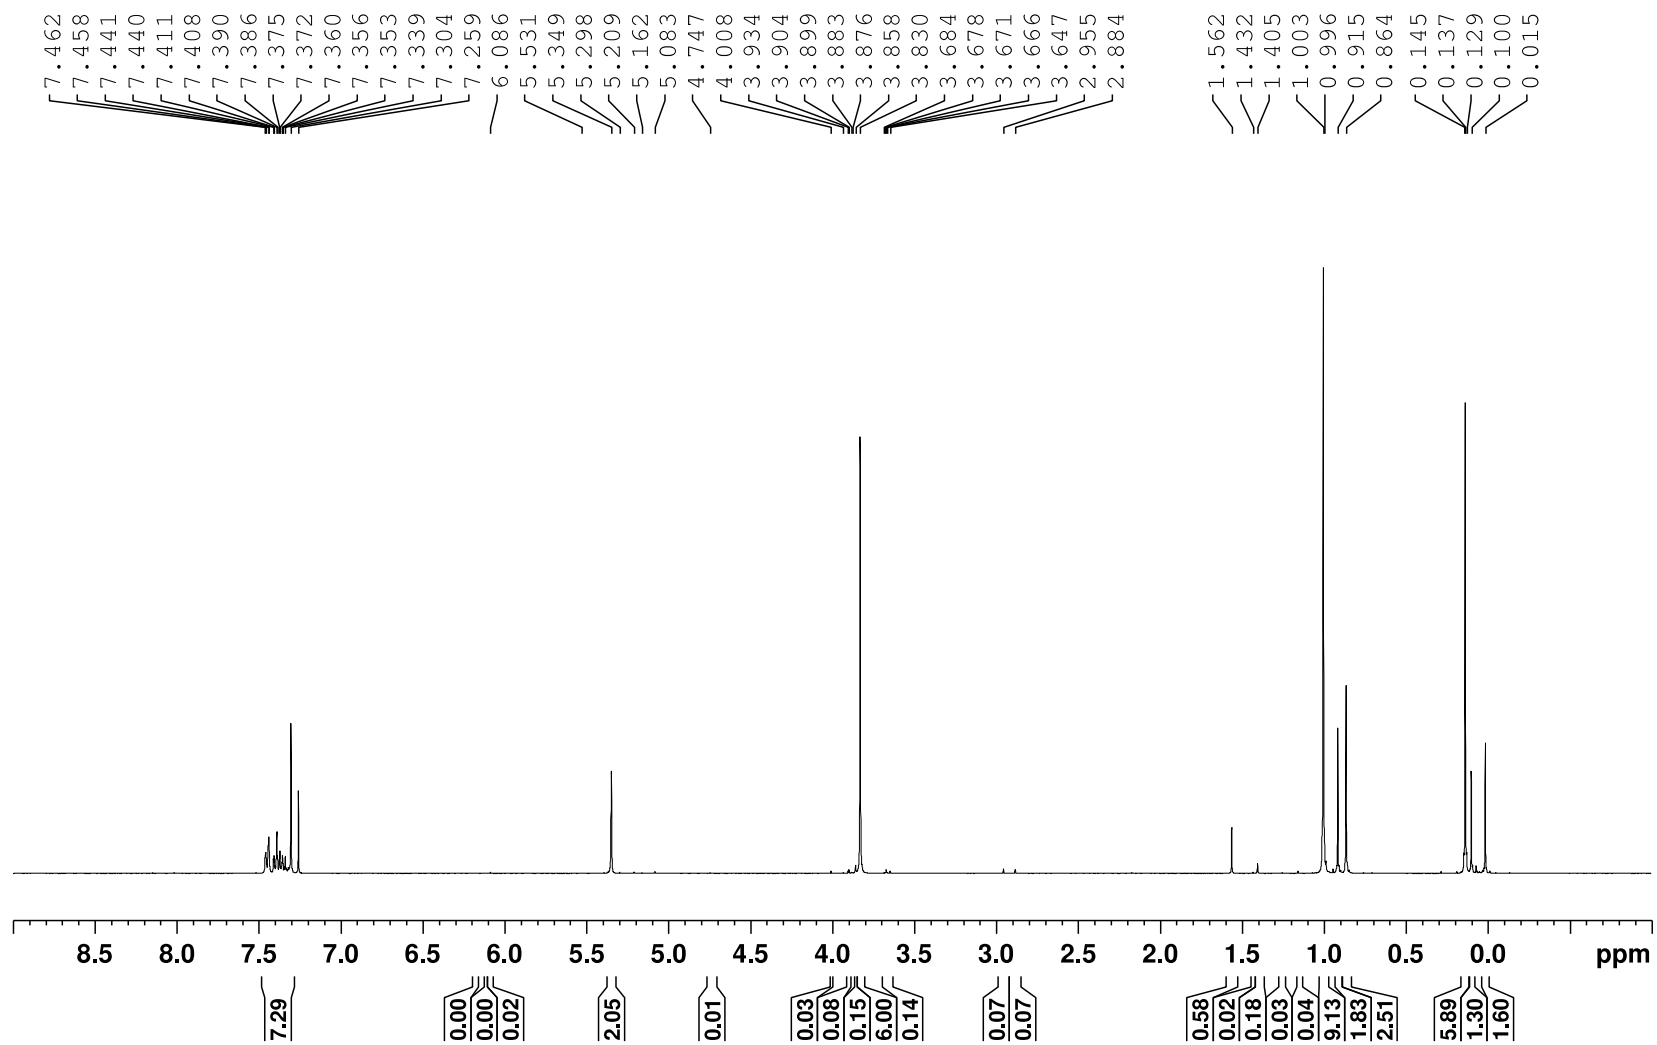

JHS-3014; Bn-Sy-Si; CDCl<sub>3</sub>; 13C; 400a; \  
2048 Scans; 10/6/16

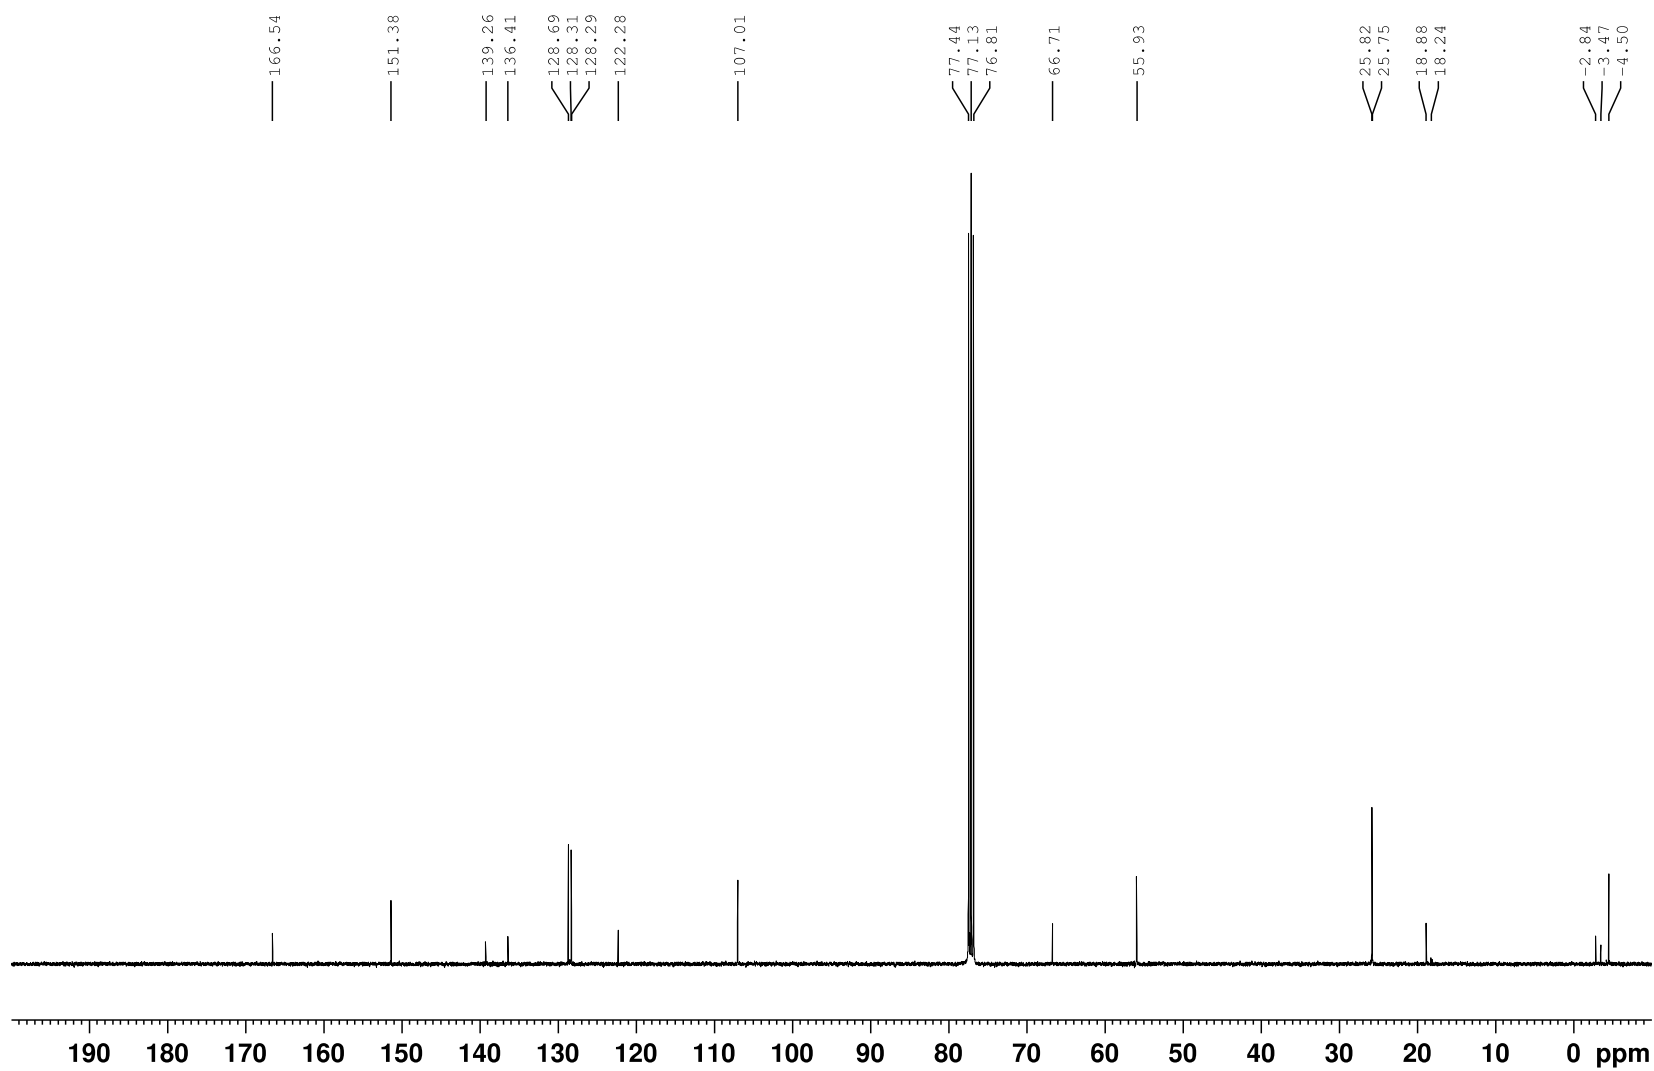

| Syringic acid-Si                                                                   |           |      |                      | <sup>13</sup> C-NMR (400 MHz, CDCl <sub>3</sub> )                                                                                                                                          | HRMS (ESI)                                                                                           |
|------------------------------------------------------------------------------------|-----------|------|----------------------|--------------------------------------------------------------------------------------------------------------------------------------------------------------------------------------------|------------------------------------------------------------------------------------------------------|
| 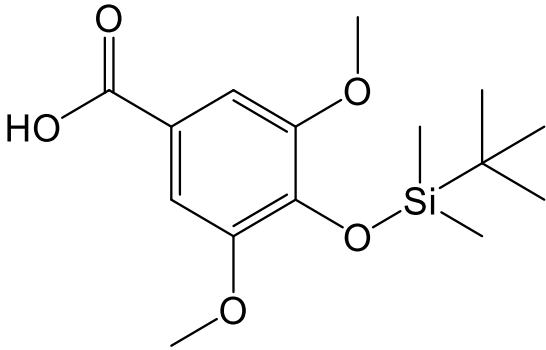 |           |      |                      | δ (ppm) +<br>Assignment                                                                                                                                                                    | Calc. Mass<br>312.14 amu                                                                             |
|                                                                                    |           |      |                      | -4.44 CH <sub>3</sub> (Si)<br>18.92 C (Si)<br>25.84 CH <sub>3</sub> (Si)<br>55.93 CH <sub>3</sub><br>107.45 Aromatic<br>121.16 Aromatic<br>139.95 Aromatic<br>151.45 Aromatic<br>171.02 CO | Calc.<br>[M + H] <sup>+</sup><br>313.14 amu<br><br>Found<br>[M + H] <sup>+</sup><br>313.14823<br>amu |
| <sup>1</sup> H-NMR (400 MHz, CDCl <sub>3</sub> )                                   |           |      |                      |                                                                                                                                                                                            |                                                                                                      |
| dδ (ppm)                                                                           | Mult. (J) | Int. | Assignment           |                                                                                                                                                                                            |                                                                                                      |
| 0.16                                                                               | s         | 6    | CH <sub>3</sub> (Si) |                                                                                                                                                                                            |                                                                                                      |
| 1.01                                                                               | s         | 9    | CH <sub>3</sub> (Si) |                                                                                                                                                                                            |                                                                                                      |
| 3.86                                                                               | s         | 6    | CH <sub>3</sub>      |                                                                                                                                                                                            |                                                                                                      |
| 7.34                                                                               | s         | 2    | Aromatic             |                                                                                                                                                                                            |                                                                                                      |
|                                                                                    |           |      |                      | Composition<br>C <sub>15</sub> H <sub>25</sub> O <sub>5</sub> Si                                                                                                                           |                                                                                                      |

**Bn-Syringic Acid-Si** (2.55 g, 6.33 mmol) and Pd/C (0.26 g, 10 wt%) were dissolved in EtOAc (60 mL, 0.1 M) in a flame dried Schlenk flask and allowed to stir overnight at RT under 1 atm H<sub>2</sub>. Upon consumption of starting material by TLC, the reaction mixture was filtered over celite and concentrated *in vacuo* to yield a white solid (1.92 g, 97% yield).

JHS-3015; Sy-Si; CDC13; 1H; 400a; 16 Scans;  
10/7/16

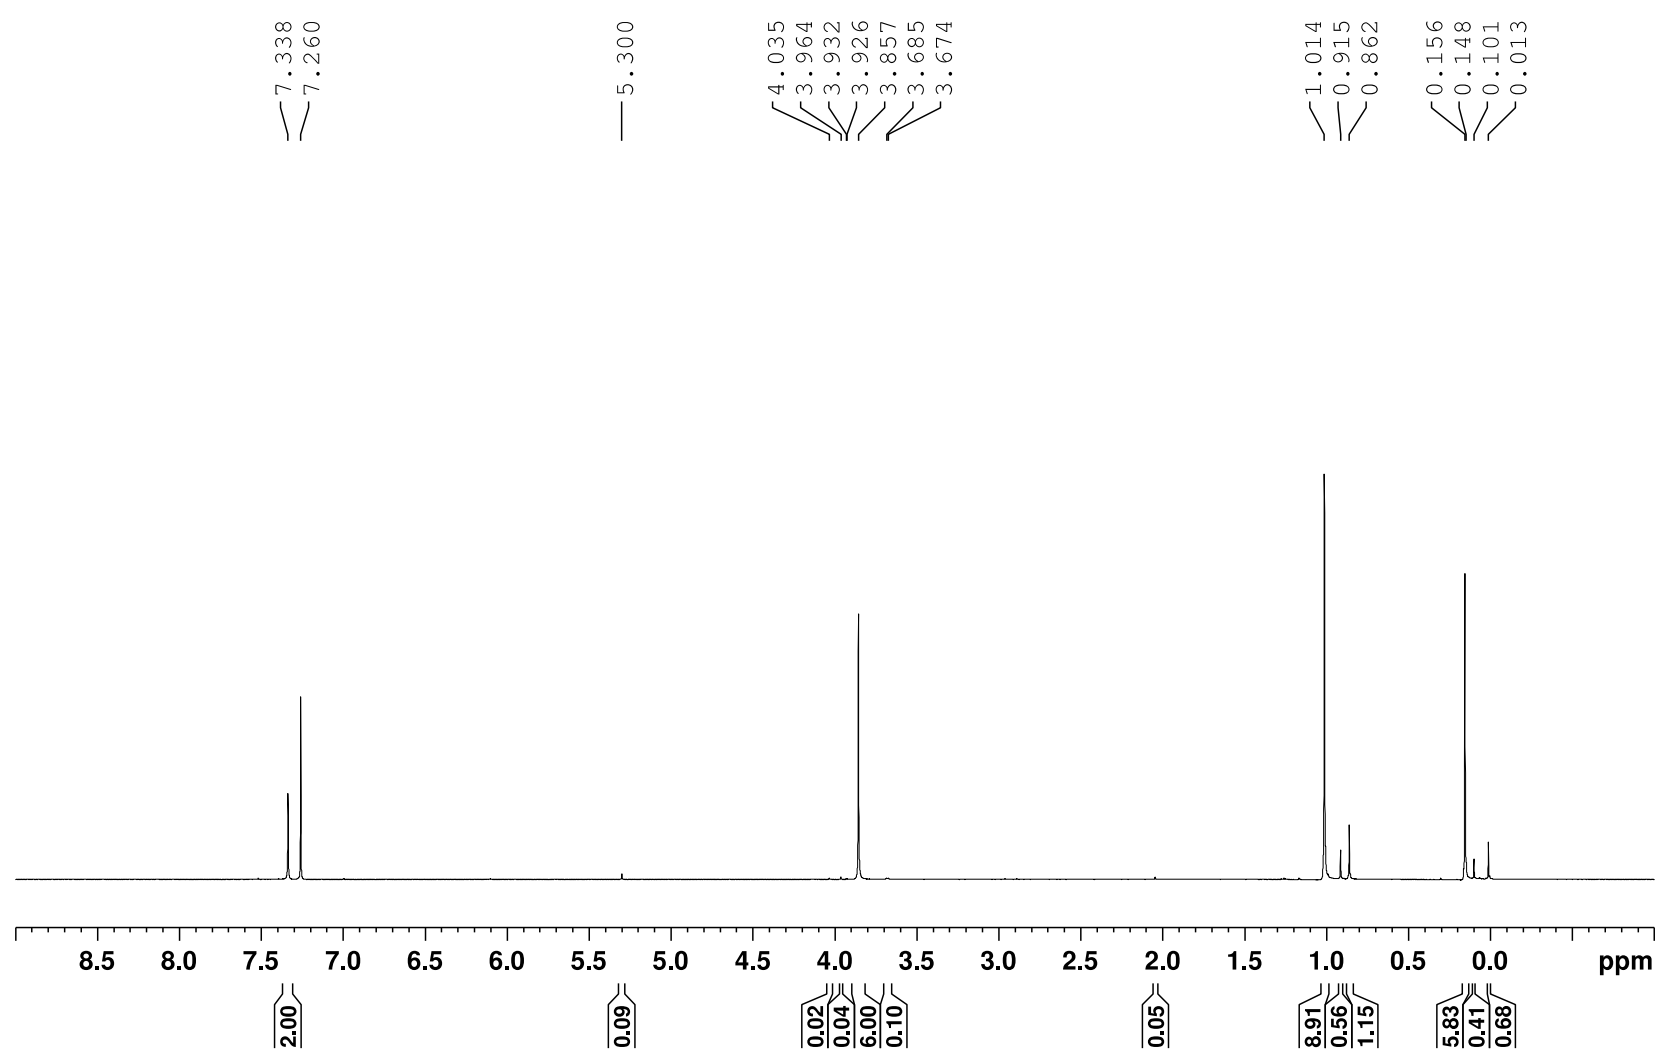

JHS-3015; Sy-Si; CDC13; 13C; 400a; 2048 Scans;  
10/7/16

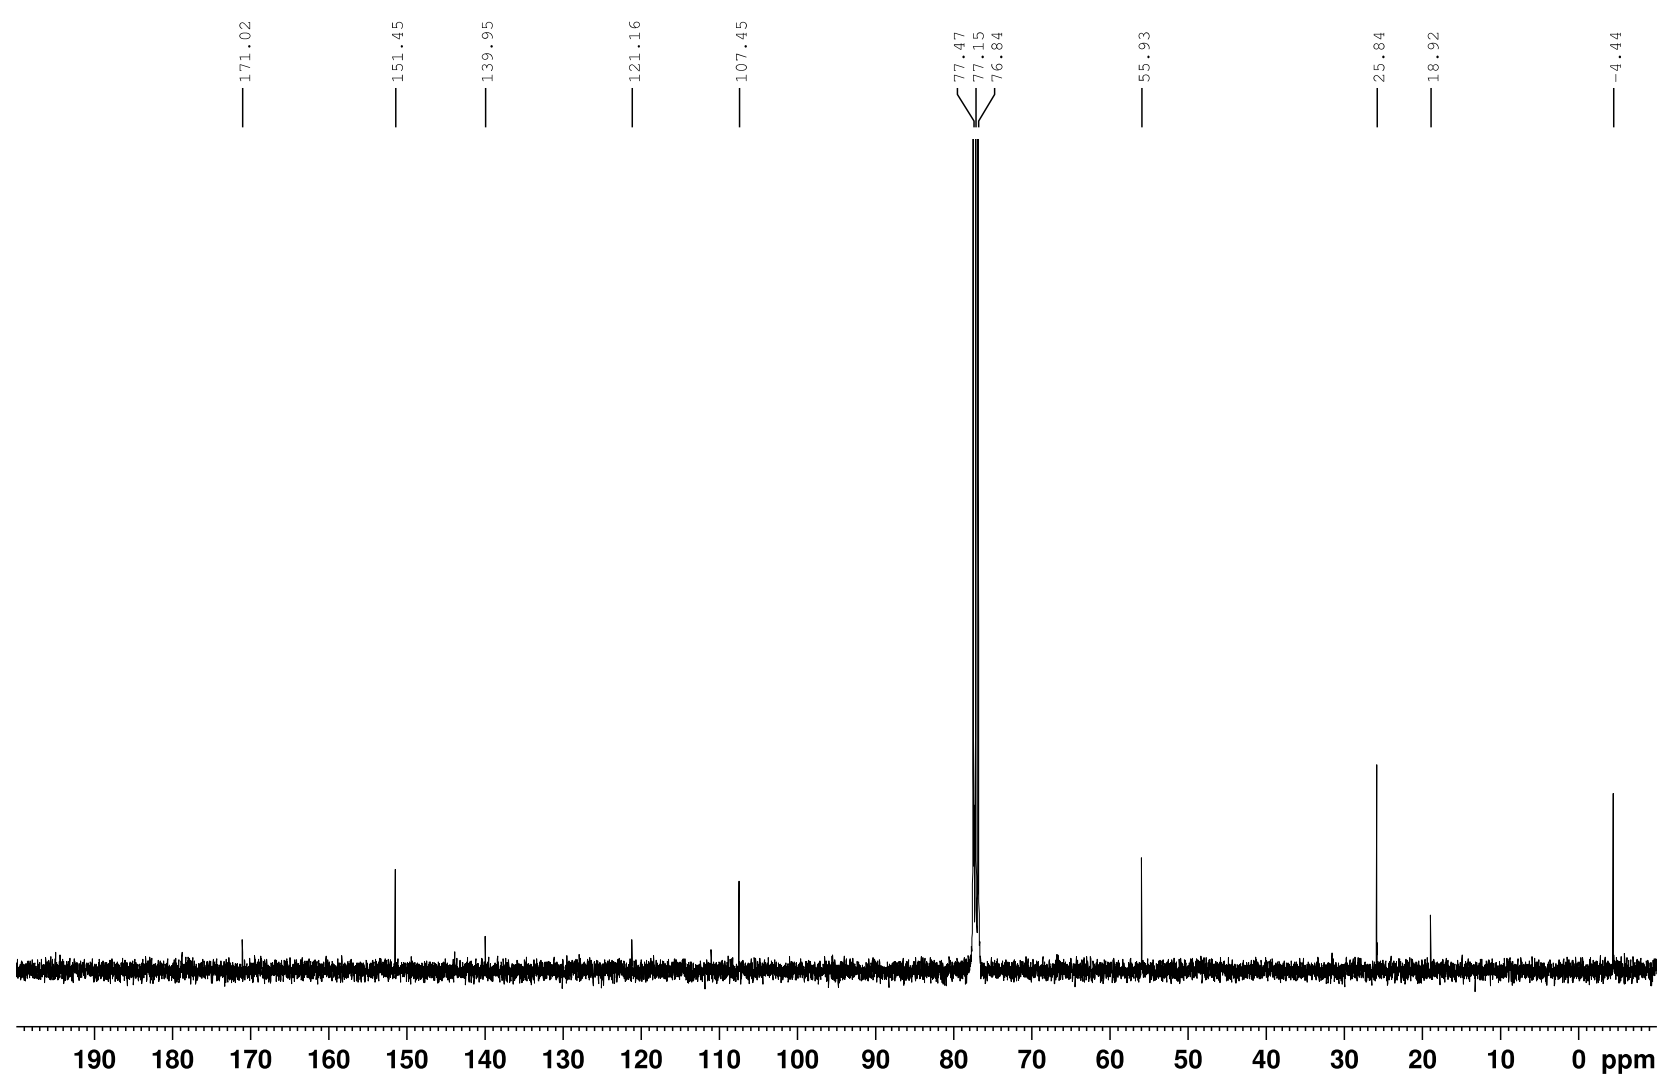

| <b>Si-Sy-Si</b>                                                                    |           |      |                      | <sup>13</sup> C-NMR (400 MHz, CDCl <sub>3</sub> )                                                                                                                                          | HRMS (ESI)                                                                                                         |
|------------------------------------------------------------------------------------|-----------|------|----------------------|--------------------------------------------------------------------------------------------------------------------------------------------------------------------------------------------|--------------------------------------------------------------------------------------------------------------------|
| 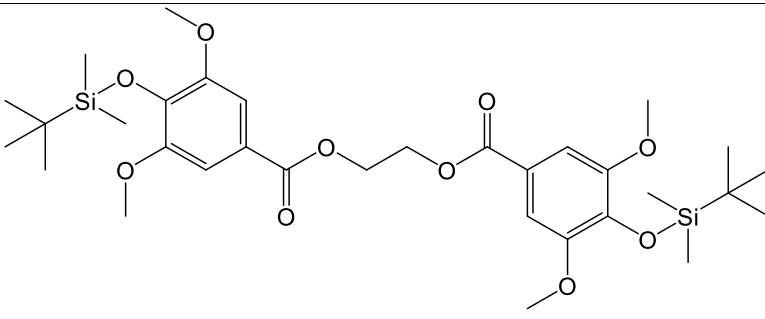 |           |      |                      | $\delta$ (ppm) +<br>Assignment                                                                                                                                                             | <u>Calc. Mass</u><br>650.29 amu                                                                                    |
|                                                                                    |           |      |                      | -4.47 CH <sub>3</sub> (Si)<br>18.91 C (Si)<br>25.84 CH <sub>3</sub> (Si)<br>55.90 CH <sub>3</sub><br>107.45 Aromatic<br>121.16 Aromatic<br>139.95 Aromatic<br>151.45 Aromatic<br>171.02 CO | <u>Calc.</u><br>[M + H] <sup>+</sup><br>651.29 amu<br><br><u>Found</u><br>[M + H] <sup>+</sup><br>651.30452<br>amu |
| <sup>1</sup> H-NMR (400 MHz, CDCl <sub>3</sub> )                                   |           |      |                      |                                                                                                                                                                                            |                                                                                                                    |
| d $\delta$ (ppm)                                                                   | Mult. (J) | Int. | Assignment           |                                                                                                                                                                                            |                                                                                                                    |
| 0.13                                                                               | s         | 12   | CH <sub>3</sub> (Si) |                                                                                                                                                                                            |                                                                                                                    |
| 1.00                                                                               | s         | 18   | CH <sub>3</sub> (Si) |                                                                                                                                                                                            |                                                                                                                    |
| 3.81                                                                               | s         | 12   | CH <sub>3</sub>      |                                                                                                                                                                                            |                                                                                                                    |
| 4.63                                                                               | s         | 4    | CH <sub>2</sub>      |                                                                                                                                                                                            |                                                                                                                    |
| 7.28                                                                               | s         | 4    | Aromatic             |                                                                                                                                                                                            |                                                                                                                    |
|                                                                                    |           |      |                      | <u>Composition</u><br>C <sub>32</sub> H <sub>50</sub> O <sub>10</sub> Si <sub>2</sub>                                                                                                      |                                                                                                                    |

**Sy-Si** (1.9 g, 6.1 mmol, 2.2 eq) and ethylene glycol (0.172 g, 2.76 mmol, 1 eq) were dissolved in dry DCM (30 mL, 0.1 M) and added to a flame dried Schlenk under nitrogen. DPTS (0.37 g, 1.24 mmol, 0.45 eq) and DCC (1.31 g, 6.4 mmol, 2.3 eq) were added sequentially and allowed to stir at RT overnight. Upon consumption of starting material by TLC, the reaction mixture was diluted with hexanes and filtered to remove DCU and concentrated to yield a pure white solid (1.01 g, 56% yield).

JHS-3016; Si-Sy-Si; CDCl<sub>3</sub>; 1H; 400a; 16 Scans;  
10/11/16

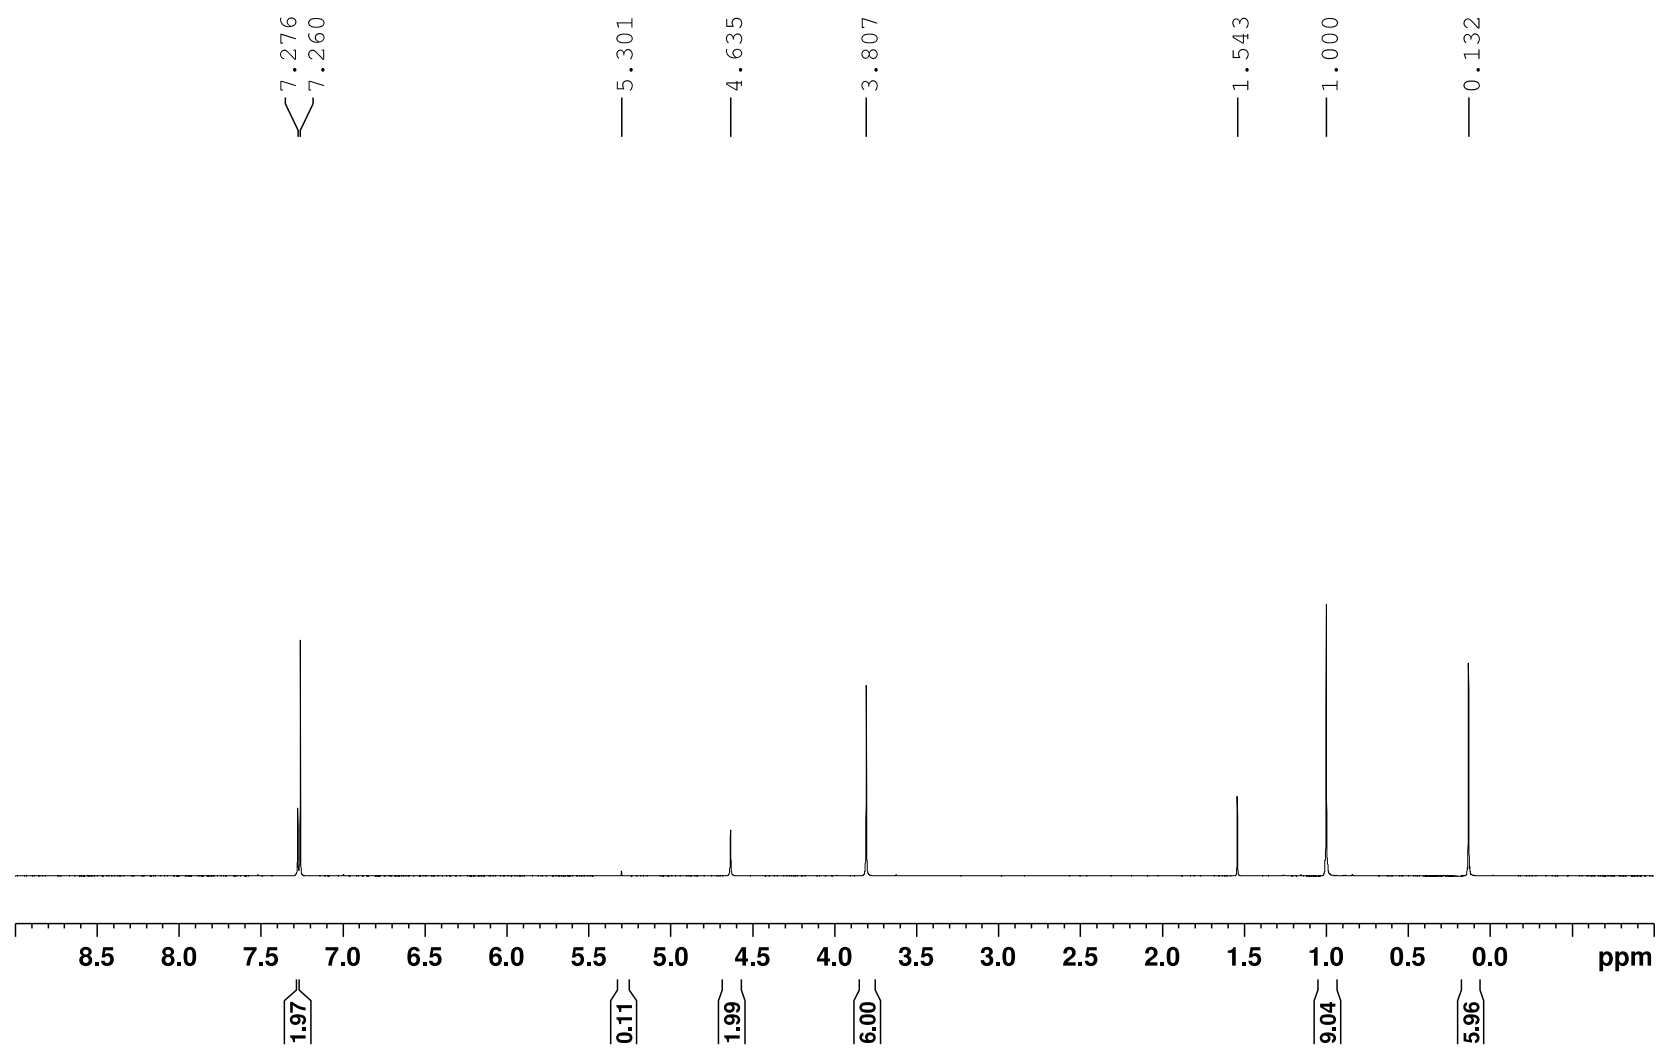

JHS-3016; Si-Sy-Si; CDCl<sub>3</sub>; 13C; 400a; 2048 Scans  
10/11/16

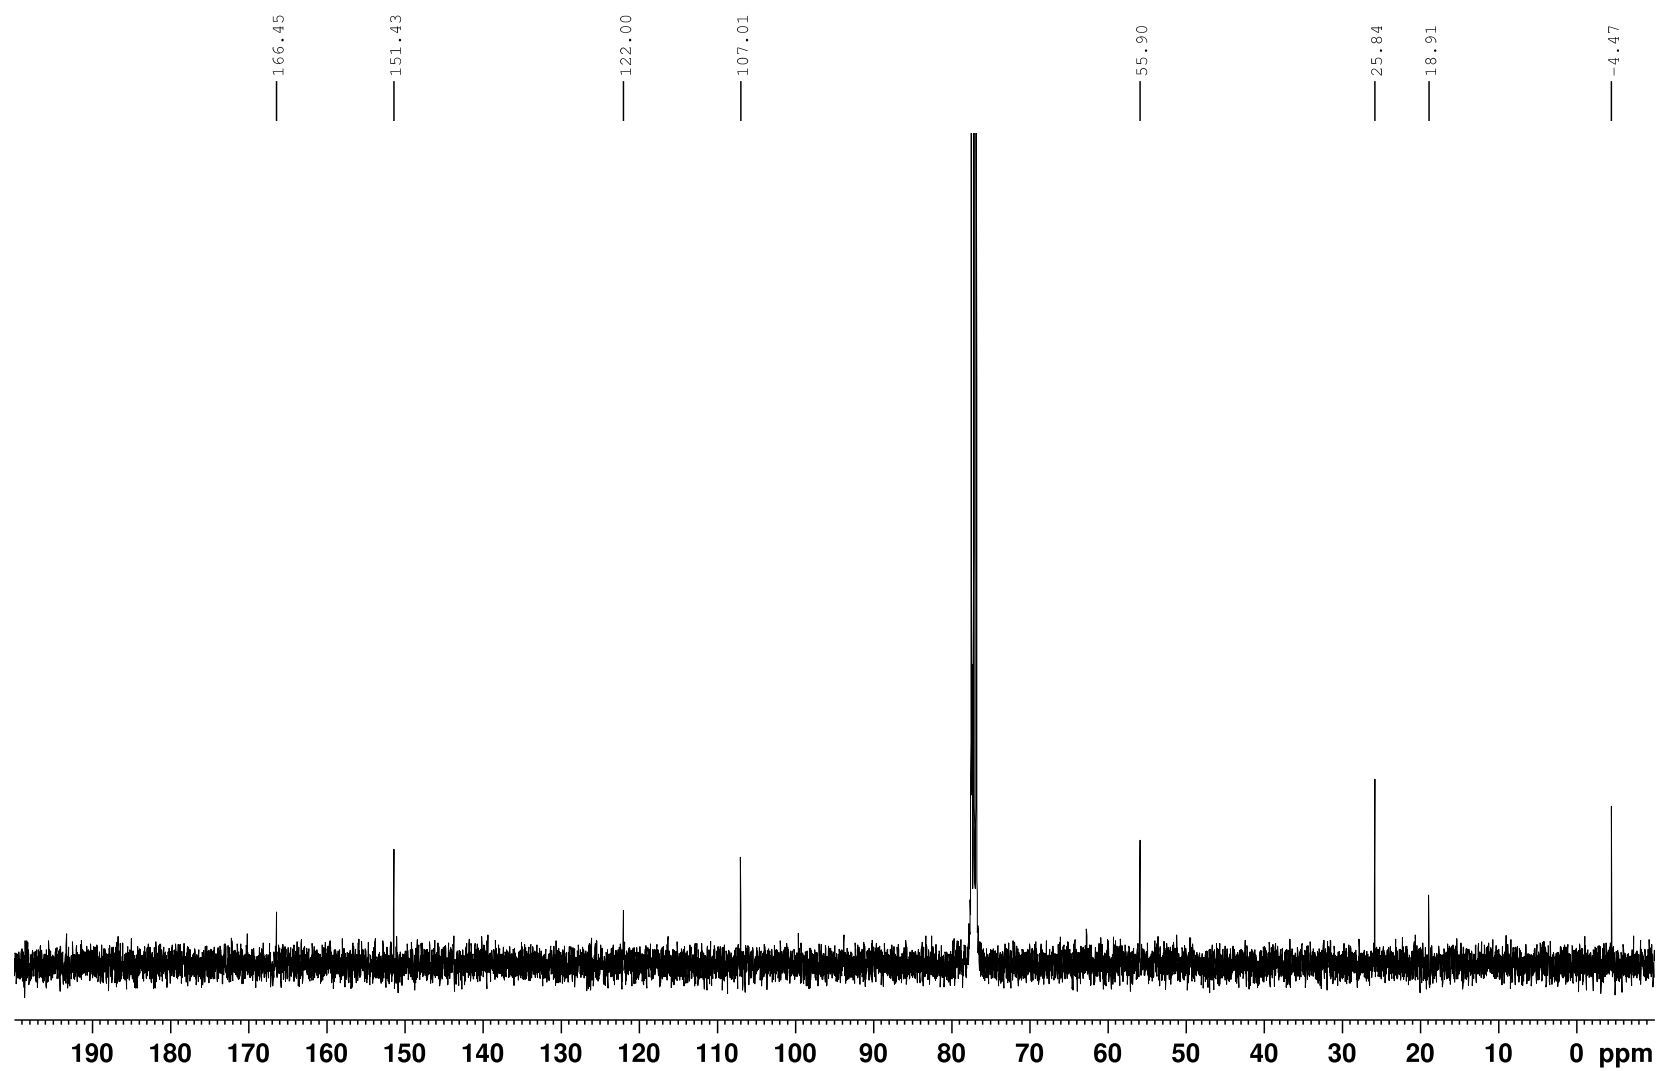

| Sy Linker                                                                          |           |       |                 | <sup>13</sup> C-NMR (400 MHz, CDCl <sub>3</sub> ) | HRMS (ESI)                                      |                      |
|------------------------------------------------------------------------------------|-----------|-------|-----------------|---------------------------------------------------|-------------------------------------------------|----------------------|
| 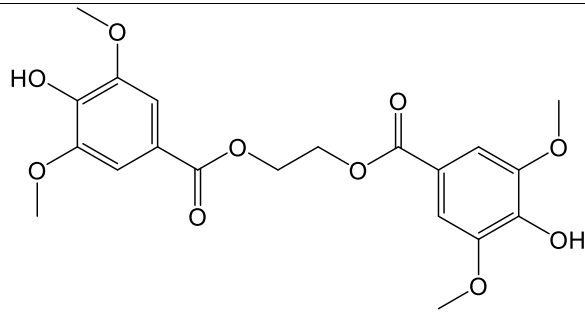 |           |       |                 | δ (ppm) + Assignment                              | Calc. Mass                                      |                      |
|                                                                                    |           |       |                 | 56.52                                             | CH <sub>3</sub>                                 | 422.12 amu           |
|                                                                                    |           |       |                 | 62.72                                             | CH <sub>2</sub>                                 |                      |
|                                                                                    |           |       |                 | 106.87                                            | Aromatic                                        | Calc.                |
|                                                                                    |           |       |                 | 120.84                                            | Aromatic                                        | [M - H] <sup>-</sup> |
|                                                                                    |           |       |                 | 139.54                                            | Aromatic                                        | 421.12 amu           |
| 146.75                                                                             | Aromatic  |       |                 |                                                   |                                                 |                      |
| 166.23                                                                             | CO        | Found |                 |                                                   |                                                 |                      |
| <sup>1</sup> H-NMR (400 MHz, CDCl <sub>3</sub> )                                   |           |       |                 |                                                   |                                                 |                      |
| dδ (ppm)                                                                           | Mult. (J) | Int.  | Assignment      |                                                   |                                                 |                      |
| 3.91                                                                               | s         | 12    | CH <sub>3</sub> |                                                   |                                                 |                      |
| 4.65                                                                               | s         | 4     | CH <sub>2</sub> |                                                   |                                                 |                      |
| 5.91                                                                               | s         | 2     | OH              |                                                   |                                                 |                      |
| 7.32                                                                               | s         | 4     | Aromatic        |                                                   |                                                 |                      |
|                                                                                    |           |       |                 |                                                   | Composition                                     |                      |
|                                                                                    |           |       |                 |                                                   | C <sub>20</sub> H <sub>22</sub> O <sub>10</sub> |                      |

TBAF (1 M in THF) (4.66 mL, 4.66 mmol, 3 eq) and AcOH (1.06 mL, 18.6 mmol, 12 eq) were dried over sieves for two h. **Si-Sy-Si** (1.01 g, 1.55 mmol, 1 eq) was dissolved in dry THF (15 mL, 0.1 M) in a flame dried Schlenk flask under nitrogen. TBAF and AcOH were combined added dropwise at 0°C, allowed to warm to RT and stir overnight. Upon consumption of starting material by TLC, the reaction mixture was diluted with brine and washed with EtOAc 3x, the combined organic layers were dried over MgSO<sub>4</sub>, concentrated, and crude solid was purified via column chromatography (silica, EtOAc/hexanes) to yield a white solid (0.6 g, 76 %).

JHS-3017; Sy; CDCl<sub>3</sub>; 1H; 400a; 16 Scans;  
10/12/16

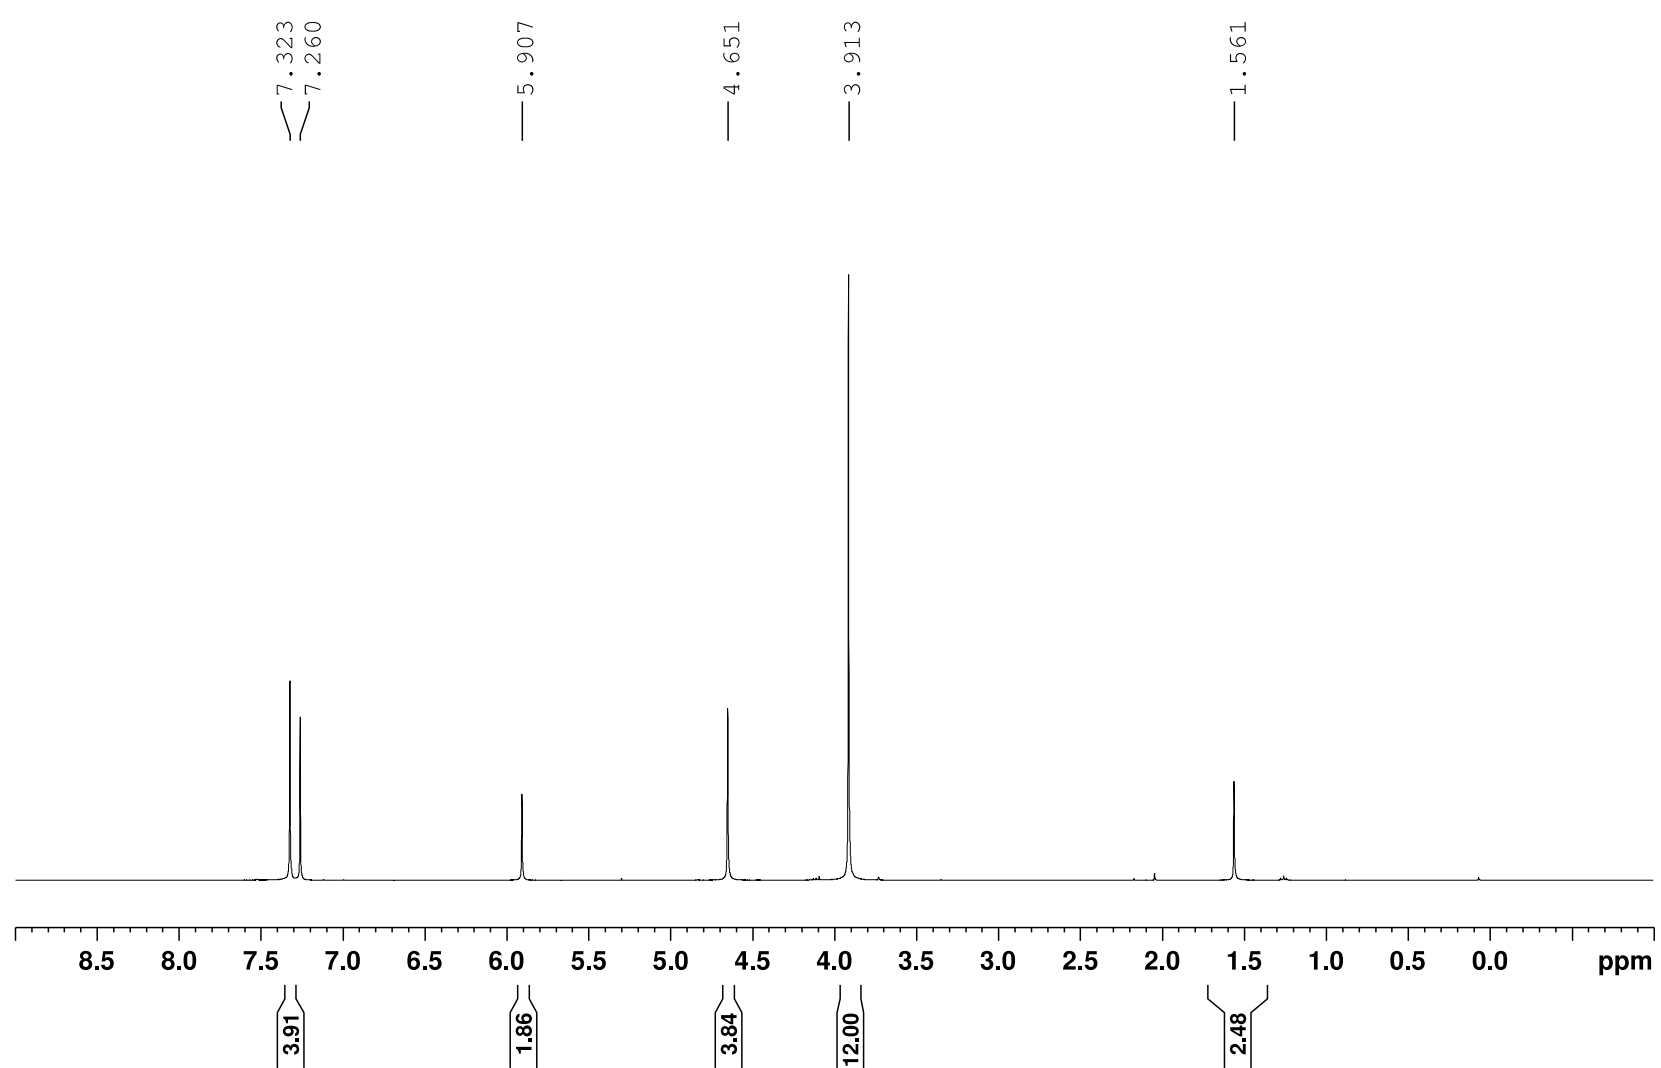

JHS-3017; Sy; CDCl<sub>3</sub>; 13C; 400a; 2048 Scans;  
10/12/16

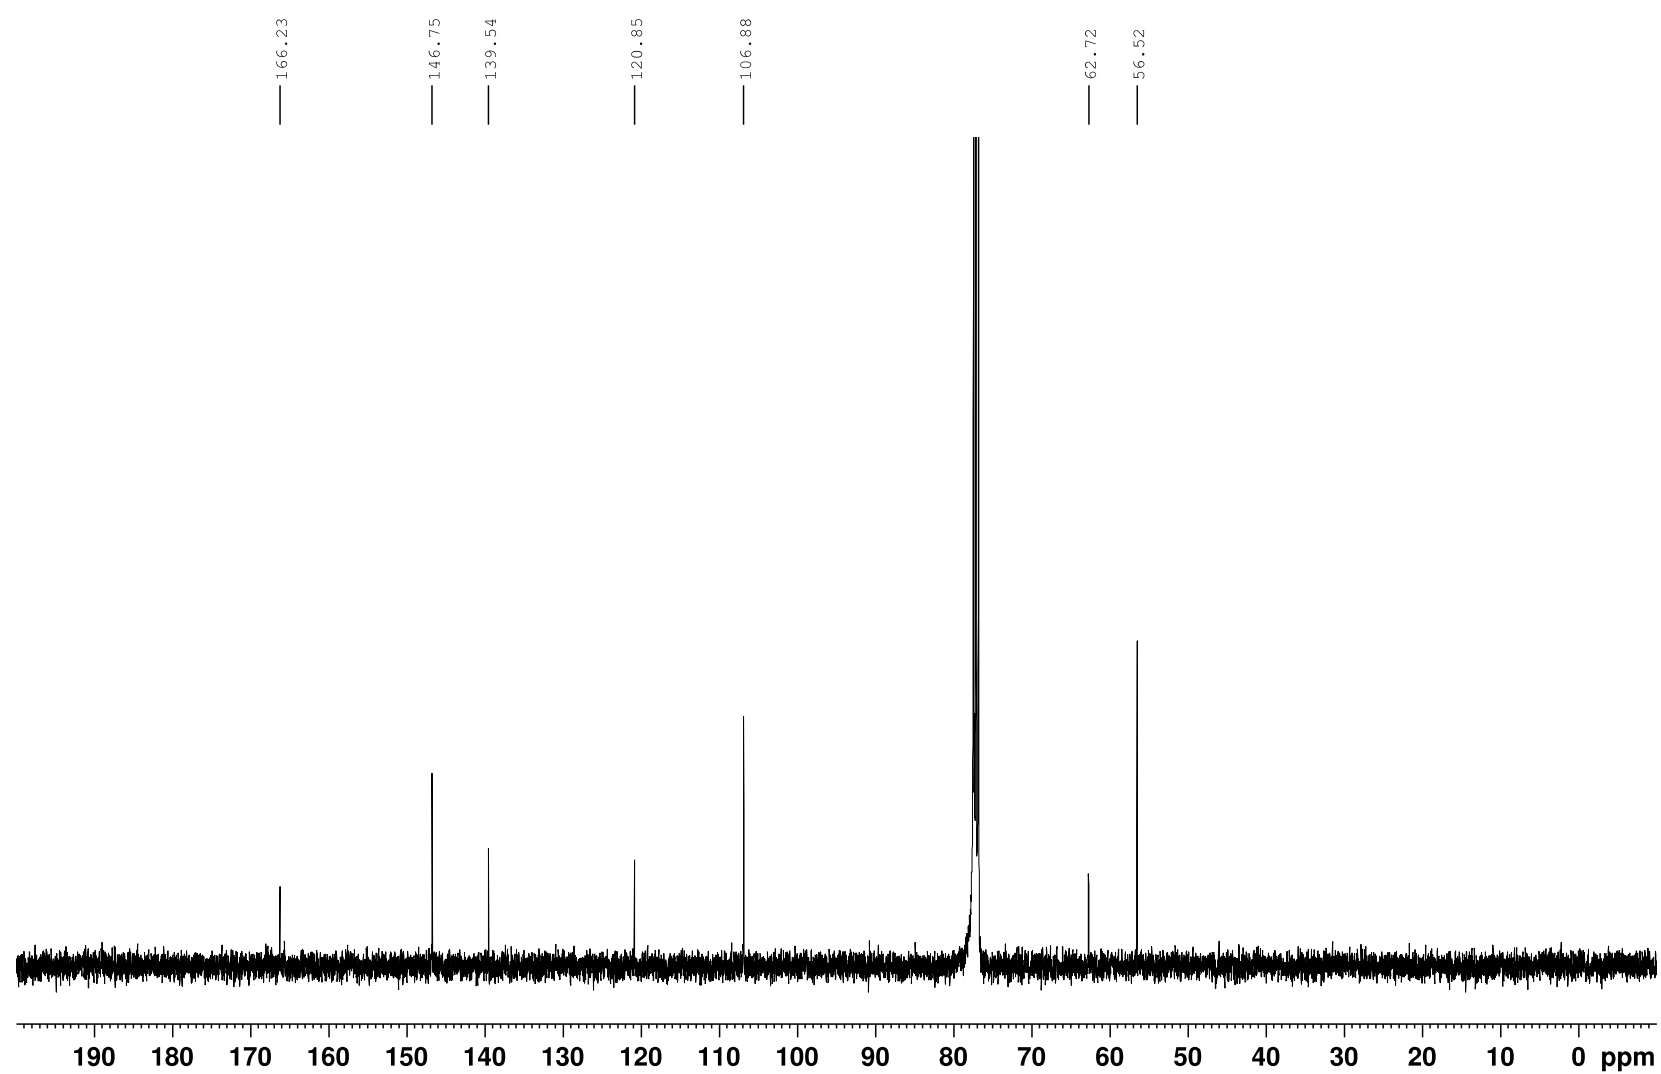

| <b>Si-LGL-Sy-LGL-Si</b>                                                                                                                                                                                                                                                                                                                                                                                                                                                                                                                                                                                                                                                                                                                                                                                                                                                                                                                                                                                                                                                                                                                                                                        |         |                 |                                           | <sup>13</sup> C-NMR (400 MHz, CDCl <sub>3</sub> ) |           | HRMS (ESI)                                                                            |              |      |   |   |                      |      |   |   |                      |      |   |    |           |      |         |   |                                   |      |         |   |                                   |      |   |    |                          |      |         |   |                     |      |   |   |                                           |      |        |   |                |      |         |   |                     |      |   |   |                   |              |  |                                      |
|------------------------------------------------------------------------------------------------------------------------------------------------------------------------------------------------------------------------------------------------------------------------------------------------------------------------------------------------------------------------------------------------------------------------------------------------------------------------------------------------------------------------------------------------------------------------------------------------------------------------------------------------------------------------------------------------------------------------------------------------------------------------------------------------------------------------------------------------------------------------------------------------------------------------------------------------------------------------------------------------------------------------------------------------------------------------------------------------------------------------------------------------------------------------------------------------|---------|-----------------|-------------------------------------------|---------------------------------------------------|-----------|---------------------------------------------------------------------------------------|--------------|------|---|---|----------------------|------|---|---|----------------------|------|---|----|-----------|------|---------|---|-----------------------------------|------|---------|---|-----------------------------------|------|---|----|--------------------------|------|---------|---|---------------------|------|---|---|-------------------------------------------|------|--------|---|----------------|------|---------|---|---------------------|------|---|---|-------------------|--------------|--|--------------------------------------|
| 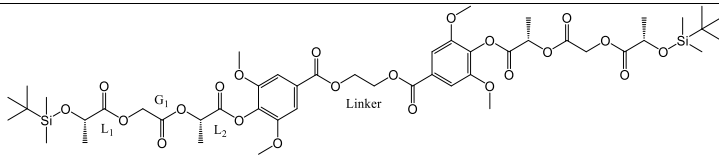                                                                                                                                                                                                                                                                                                                                                                                                                                                                                                                                                                                                                                                                                                                                                                                                                                                                                                                                                                                                                                                                                                             |         |                 |                                           | $\delta$ (ppm) + Assignment                       |           | <u>Calc. Mass</u>                                                                     |              |      |   |   |                      |      |   |   |                      |      |   |    |           |      |         |   |                                   |      |         |   |                                   |      |   |    |                          |      |         |   |                     |      |   |   |                                           |      |        |   |                |      |         |   |                     |      |   |   |                   |              |  |                                      |
|                                                                                                                                                                                                                                                                                                                                                                                                                                                                                                                                                                                                                                                                                                                                                                                                                                                                                                                                                                                                                                                                                                                                                                                                |         |                 |                                           | -5.22 CH <sub>3</sub> (Si)                        |           | 1,054.39 amu                                                                          |              |      |   |   |                      |      |   |   |                      |      |   |    |           |      |         |   |                                   |      |         |   |                                   |      |   |    |                          |      |         |   |                     |      |   |   |                                           |      |        |   |                |      |         |   |                     |      |   |   |                   |              |  |                                      |
| <sup>1</sup> H-NMR (400 MHz, CDCl <sub>3</sub> )                                                                                                                                                                                                                                                                                                                                                                                                                                                                                                                                                                                                                                                                                                                                                                                                                                                                                                                                                                                                                                                                                                                                               |         |                 |                                           | -4.84 CH <sub>3</sub> (Si)                        |           | <u>Calc.</u><br>[M + H] <sup>+</sup>                                                  |              |      |   |   |                      |      |   |   |                      |      |   |    |           |      |         |   |                                   |      |         |   |                                   |      |   |    |                          |      |         |   |                     |      |   |   |                                           |      |        |   |                |      |         |   |                     |      |   |   |                   |              |  |                                      |
|                                                                                                                                                                                                                                                                                                                                                                                                                                                                                                                                                                                                                                                                                                                                                                                                                                                                                                                                                                                                                                                                                                                                                                                                |         |                 |                                           | 17.25 CH <sub>3</sub> (L)                         |           |                                                                                       | 1,055.39 amu |      |   |   |                      |      |   |   |                      |      |   |    |           |      |         |   |                                   |      |         |   |                                   |      |   |    |                          |      |         |   |                     |      |   |   |                                           |      |        |   |                |      |         |   |                     |      |   |   |                   |              |  |                                      |
| <table border="1" style="width: 100%; border-collapse: collapse;"> <thead> <tr> <th style="text-align: left;">d<math>\delta</math> (ppm)</th> <th style="text-align: left;">Mult. (J)</th> <th style="text-align: left;">Int.</th> <th style="text-align: left;">Assignment</th> </tr> </thead> <tbody> <tr><td>0.10</td><td>s</td><td>6</td><td>CH<sub>3</sub> (Si)</td></tr> <tr><td>0.12</td><td>s</td><td>6</td><td>CH<sub>3</sub> (Si)</td></tr> <tr><td>0.91</td><td>s</td><td>18</td><td>t-Bu (Si)</td></tr> <tr><td>1.48</td><td>d (6.8)</td><td>6</td><td>CH<sub>3</sub> (L<sub>1</sub>)</td></tr> <tr><td>1.71</td><td>d (7.1)</td><td>6</td><td>L<sub>2</sub> (CH<sub>3</sub>)</td></tr> <tr><td>3.83</td><td>s</td><td>12</td><td>CH<sub>3</sub> (Linker)</td></tr> <tr><td>4.46</td><td>q (6.8)</td><td>2</td><td>L<sub>1</sub> (CH)</td></tr> <tr><td>4.70</td><td>m</td><td>6</td><td>CH<sub>2</sub> (G<sub>1</sub>, Linker)</td></tr> <tr><td>4.84</td><td>d (16)</td><td>2</td><td>G<sub>1</sub></td></tr> <tr><td>5.54</td><td>q (7.1)</td><td>2</td><td>L<sub>2</sub> (CH)</td></tr> <tr><td>7.31</td><td>s</td><td>4</td><td>Aromatic (Linker)</td></tr> </tbody> </table> |         |                 |                                           | d $\delta$ (ppm)                                  | Mult. (J) | Int.                                                                                  | Assignment   | 0.10 | s | 6 | CH <sub>3</sub> (Si) | 0.12 | s | 6 | CH <sub>3</sub> (Si) | 0.91 | s | 18 | t-Bu (Si) | 1.48 | d (6.8) | 6 | CH <sub>3</sub> (L <sub>1</sub> ) | 1.71 | d (7.1) | 6 | L <sub>2</sub> (CH <sub>3</sub> ) | 3.83 | s | 12 | CH <sub>3</sub> (Linker) | 4.46 | q (6.8) | 2 | L <sub>1</sub> (CH) | 4.70 | m | 6 | CH <sub>2</sub> (G <sub>1</sub> , Linker) | 4.84 | d (16) | 2 | G <sub>1</sub> | 5.54 | q (7.1) | 2 | L <sub>2</sub> (CH) | 7.31 | s | 4 | Aromatic (Linker) | 18.39 C (Si) |  | <u>Found</u><br>[M + H] <sup>+</sup> |
|                                                                                                                                                                                                                                                                                                                                                                                                                                                                                                                                                                                                                                                                                                                                                                                                                                                                                                                                                                                                                                                                                                                                                                                                |         |                 |                                           | d $\delta$ (ppm)                                  | Mult. (J) | Int.                                                                                  | Assignment   |      |   |   |                      |      |   |   |                      |      |   |    |           |      |         |   |                                   |      |         |   |                                   |      |   |    |                          |      |         |   |                     |      |   |   |                                           |      |        |   |                |      |         |   |                     |      |   |   |                   |              |  |                                      |
| 0.10                                                                                                                                                                                                                                                                                                                                                                                                                                                                                                                                                                                                                                                                                                                                                                                                                                                                                                                                                                                                                                                                                                                                                                                           | s       | 6               | CH <sub>3</sub> (Si)                      |                                                   |           |                                                                                       |              |      |   |   |                      |      |   |   |                      |      |   |    |           |      |         |   |                                   |      |         |   |                                   |      |   |    |                          |      |         |   |                     |      |   |   |                                           |      |        |   |                |      |         |   |                     |      |   |   |                   |              |  |                                      |
| 0.12                                                                                                                                                                                                                                                                                                                                                                                                                                                                                                                                                                                                                                                                                                                                                                                                                                                                                                                                                                                                                                                                                                                                                                                           | s       | 6               | CH <sub>3</sub> (Si)                      |                                                   |           |                                                                                       |              |      |   |   |                      |      |   |   |                      |      |   |    |           |      |         |   |                                   |      |         |   |                                   |      |   |    |                          |      |         |   |                     |      |   |   |                                           |      |        |   |                |      |         |   |                     |      |   |   |                   |              |  |                                      |
| 0.91                                                                                                                                                                                                                                                                                                                                                                                                                                                                                                                                                                                                                                                                                                                                                                                                                                                                                                                                                                                                                                                                                                                                                                                           | s       | 18              | t-Bu (Si)                                 |                                                   |           |                                                                                       |              |      |   |   |                      |      |   |   |                      |      |   |    |           |      |         |   |                                   |      |         |   |                                   |      |   |    |                          |      |         |   |                     |      |   |   |                                           |      |        |   |                |      |         |   |                     |      |   |   |                   |              |  |                                      |
| 1.48                                                                                                                                                                                                                                                                                                                                                                                                                                                                                                                                                                                                                                                                                                                                                                                                                                                                                                                                                                                                                                                                                                                                                                                           | d (6.8) | 6               | CH <sub>3</sub> (L <sub>1</sub> )         |                                                   |           |                                                                                       |              |      |   |   |                      |      |   |   |                      |      |   |    |           |      |         |   |                                   |      |         |   |                                   |      |   |    |                          |      |         |   |                     |      |   |   |                                           |      |        |   |                |      |         |   |                     |      |   |   |                   |              |  |                                      |
| 1.71                                                                                                                                                                                                                                                                                                                                                                                                                                                                                                                                                                                                                                                                                                                                                                                                                                                                                                                                                                                                                                                                                                                                                                                           | d (7.1) | 6               | L <sub>2</sub> (CH <sub>3</sub> )         |                                                   |           |                                                                                       |              |      |   |   |                      |      |   |   |                      |      |   |    |           |      |         |   |                                   |      |         |   |                                   |      |   |    |                          |      |         |   |                     |      |   |   |                                           |      |        |   |                |      |         |   |                     |      |   |   |                   |              |  |                                      |
| 3.83                                                                                                                                                                                                                                                                                                                                                                                                                                                                                                                                                                                                                                                                                                                                                                                                                                                                                                                                                                                                                                                                                                                                                                                           | s       | 12              | CH <sub>3</sub> (Linker)                  |                                                   |           |                                                                                       |              |      |   |   |                      |      |   |   |                      |      |   |    |           |      |         |   |                                   |      |         |   |                                   |      |   |    |                          |      |         |   |                     |      |   |   |                                           |      |        |   |                |      |         |   |                     |      |   |   |                   |              |  |                                      |
| 4.46                                                                                                                                                                                                                                                                                                                                                                                                                                                                                                                                                                                                                                                                                                                                                                                                                                                                                                                                                                                                                                                                                                                                                                                           | q (6.8) | 2               | L <sub>1</sub> (CH)                       |                                                   |           |                                                                                       |              |      |   |   |                      |      |   |   |                      |      |   |    |           |      |         |   |                                   |      |         |   |                                   |      |   |    |                          |      |         |   |                     |      |   |   |                                           |      |        |   |                |      |         |   |                     |      |   |   |                   |              |  |                                      |
| 4.70                                                                                                                                                                                                                                                                                                                                                                                                                                                                                                                                                                                                                                                                                                                                                                                                                                                                                                                                                                                                                                                                                                                                                                                           | m       | 6               | CH <sub>2</sub> (G <sub>1</sub> , Linker) |                                                   |           |                                                                                       |              |      |   |   |                      |      |   |   |                      |      |   |    |           |      |         |   |                                   |      |         |   |                                   |      |   |    |                          |      |         |   |                     |      |   |   |                                           |      |        |   |                |      |         |   |                     |      |   |   |                   |              |  |                                      |
| 4.84                                                                                                                                                                                                                                                                                                                                                                                                                                                                                                                                                                                                                                                                                                                                                                                                                                                                                                                                                                                                                                                                                                                                                                                           | d (16)  | 2               | G <sub>1</sub>                            |                                                   |           |                                                                                       |              |      |   |   |                      |      |   |   |                      |      |   |    |           |      |         |   |                                   |      |         |   |                                   |      |   |    |                          |      |         |   |                     |      |   |   |                                           |      |        |   |                |      |         |   |                     |      |   |   |                   |              |  |                                      |
| 5.54                                                                                                                                                                                                                                                                                                                                                                                                                                                                                                                                                                                                                                                                                                                                                                                                                                                                                                                                                                                                                                                                                                                                                                                           | q (7.1) | 2               | L <sub>2</sub> (CH)                       |                                                   |           |                                                                                       |              |      |   |   |                      |      |   |   |                      |      |   |    |           |      |         |   |                                   |      |         |   |                                   |      |   |    |                          |      |         |   |                     |      |   |   |                                           |      |        |   |                |      |         |   |                     |      |   |   |                   |              |  |                                      |
| 7.31                                                                                                                                                                                                                                                                                                                                                                                                                                                                                                                                                                                                                                                                                                                                                                                                                                                                                                                                                                                                                                                                                                                                                                                           | s       | 4               | Aromatic (Linker)                         |                                                   |           |                                                                                       |              |      |   |   |                      |      |   |   |                      |      |   |    |           |      |         |   |                                   |      |         |   |                                   |      |   |    |                          |      |         |   |                     |      |   |   |                                           |      |        |   |                |      |         |   |                     |      |   |   |                   |              |  |                                      |
| 21.46 CH <sub>3</sub> (L)                                                                                                                                                                                                                                                                                                                                                                                                                                                                                                                                                                                                                                                                                                                                                                                                                                                                                                                                                                                                                                                                                                                                                                      |         | 1,055.40008 amu |                                           |                                                   |           |                                                                                       |              |      |   |   |                      |      |   |   |                      |      |   |    |           |      |         |   |                                   |      |         |   |                                   |      |   |    |                          |      |         |   |                     |      |   |   |                                           |      |        |   |                |      |         |   |                     |      |   |   |                   |              |  |                                      |
|                                                                                                                                                                                                                                                                                                                                                                                                                                                                                                                                                                                                                                                                                                                                                                                                                                                                                                                                                                                                                                                                                                                                                                                                |         |                 |                                           | 25.80 t-Bu (Si)                                   |           | <u>Composition</u><br>C <sub>48</sub> H <sub>70</sub> O <sub>22</sub> Si <sub>2</sub> |              |      |   |   |                      |      |   |   |                      |      |   |    |           |      |         |   |                                   |      |         |   |                                   |      |   |    |                          |      |         |   |                     |      |   |   |                                           |      |        |   |                |      |         |   |                     |      |   |   |                   |              |  |                                      |
|                                                                                                                                                                                                                                                                                                                                                                                                                                                                                                                                                                                                                                                                                                                                                                                                                                                                                                                                                                                                                                                                                                                                                                                                |         |                 |                                           | 56.47 CH <sub>3</sub> (MeO)                       |           |                                                                                       |              |      |   |   |                      |      |   |   |                      |      |   |    |           |      |         |   |                                   |      |         |   |                                   |      |   |    |                          |      |         |   |                     |      |   |   |                                           |      |        |   |                |      |         |   |                     |      |   |   |                   |              |  |                                      |
|                                                                                                                                                                                                                                                                                                                                                                                                                                                                                                                                                                                                                                                                                                                                                                                                                                                                                                                                                                                                                                                                                                                                                                                                |         |                 |                                           | 60.51 CH <sub>2</sub> (G <sub>1</sub> )           |           |                                                                                       |              |      |   |   |                      |      |   |   |                      |      |   |    |           |      |         |   |                                   |      |         |   |                                   |      |   |    |                          |      |         |   |                     |      |   |   |                                           |      |        |   |                |      |         |   |                     |      |   |   |                   |              |  |                                      |
|                                                                                                                                                                                                                                                                                                                                                                                                                                                                                                                                                                                                                                                                                                                                                                                                                                                                                                                                                                                                                                                                                                                                                                                                |         |                 |                                           | 62.99 CH (L)                                      |           |                                                                                       |              |      |   |   |                      |      |   |   |                      |      |   |    |           |      |         |   |                                   |      |         |   |                                   |      |   |    |                          |      |         |   |                     |      |   |   |                                           |      |        |   |                |      |         |   |                     |      |   |   |                   |              |  |                                      |
|                                                                                                                                                                                                                                                                                                                                                                                                                                                                                                                                                                                                                                                                                                                                                                                                                                                                                                                                                                                                                                                                                                                                                                                                |         |                 |                                           | 68.18 CH <sub>2</sub> (Linker)                    |           |                                                                                       |              |      |   |   |                      |      |   |   |                      |      |   |    |           |      |         |   |                                   |      |         |   |                                   |      |   |    |                          |      |         |   |                     |      |   |   |                                           |      |        |   |                |      |         |   |                     |      |   |   |                   |              |  |                                      |
|                                                                                                                                                                                                                                                                                                                                                                                                                                                                                                                                                                                                                                                                                                                                                                                                                                                                                                                                                                                                                                                                                                                                                                                                |         |                 |                                           | 69.08 CH (L)                                      |           |                                                                                       |              |      |   |   |                      |      |   |   |                      |      |   |    |           |      |         |   |                                   |      |         |   |                                   |      |   |    |                          |      |         |   |                     |      |   |   |                                           |      |        |   |                |      |         |   |                     |      |   |   |                   |              |  |                                      |
|                                                                                                                                                                                                                                                                                                                                                                                                                                                                                                                                                                                                                                                                                                                                                                                                                                                                                                                                                                                                                                                                                                                                                                                                |         |                 |                                           | 106.52 Aromatic                                   |           |                                                                                       |              |      |   |   |                      |      |   |   |                      |      |   |    |           |      |         |   |                                   |      |         |   |                                   |      |   |    |                          |      |         |   |                     |      |   |   |                                           |      |        |   |                |      |         |   |                     |      |   |   |                   |              |  |                                      |
|                                                                                                                                                                                                                                                                                                                                                                                                                                                                                                                                                                                                                                                                                                                                                                                                                                                                                                                                                                                                                                                                                                                                                                                                |         |                 |                                           | 128.12 Aromatic                                   |           |                                                                                       |              |      |   |   |                      |      |   |   |                      |      |   |    |           |      |         |   |                                   |      |         |   |                                   |      |   |    |                          |      |         |   |                     |      |   |   |                                           |      |        |   |                |      |         |   |                     |      |   |   |                   |              |  |                                      |
|                                                                                                                                                                                                                                                                                                                                                                                                                                                                                                                                                                                                                                                                                                                                                                                                                                                                                                                                                                                                                                                                                                                                                                                                |         |                 |                                           | 132.24 Aromatic                                   |           |                                                                                       |              |      |   |   |                      |      |   |   |                      |      |   |    |           |      |         |   |                                   |      |         |   |                                   |      |   |    |                          |      |         |   |                     |      |   |   |                                           |      |        |   |                |      |         |   |                     |      |   |   |                   |              |  |                                      |
|                                                                                                                                                                                                                                                                                                                                                                                                                                                                                                                                                                                                                                                                                                                                                                                                                                                                                                                                                                                                                                                                                                                                                                                                |         |                 |                                           | 152.15 Aromatic                                   |           |                                                                                       |              |      |   |   |                      |      |   |   |                      |      |   |    |           |      |         |   |                                   |      |         |   |                                   |      |   |    |                          |      |         |   |                     |      |   |   |                                           |      |        |   |                |      |         |   |                     |      |   |   |                   |              |  |                                      |
|                                                                                                                                                                                                                                                                                                                                                                                                                                                                                                                                                                                                                                                                                                                                                                                                                                                                                                                                                                                                                                                                                                                                                                                                |         |                 |                                           | 165.73 CO                                         |           |                                                                                       |              |      |   |   |                      |      |   |   |                      |      |   |    |           |      |         |   |                                   |      |         |   |                                   |      |   |    |                          |      |         |   |                     |      |   |   |                                           |      |        |   |                |      |         |   |                     |      |   |   |                   |              |  |                                      |
|                                                                                                                                                                                                                                                                                                                                                                                                                                                                                                                                                                                                                                                                                                                                                                                                                                                                                                                                                                                                                                                                                                                                                                                                |         |                 |                                           | 166.73 CO                                         |           |                                                                                       |              |      |   |   |                      |      |   |   |                      |      |   |    |           |      |         |   |                                   |      |         |   |                                   |      |   |    |                          |      |         |   |                     |      |   |   |                                           |      |        |   |                |      |         |   |                     |      |   |   |                   |              |  |                                      |
|                                                                                                                                                                                                                                                                                                                                                                                                                                                                                                                                                                                                                                                                                                                                                                                                                                                                                                                                                                                                                                                                                                                                                                                                |         |                 |                                           | 167.57 CO                                         |           |                                                                                       |              |      |   |   |                      |      |   |   |                      |      |   |    |           |      |         |   |                                   |      |         |   |                                   |      |   |    |                          |      |         |   |                     |      |   |   |                                           |      |        |   |                |      |         |   |                     |      |   |   |                   |              |  |                                      |
|                                                                                                                                                                                                                                                                                                                                                                                                                                                                                                                                                                                                                                                                                                                                                                                                                                                                                                                                                                                                                                                                                                                                                                                                |         |                 |                                           | 173.54 CO                                         |           |                                                                                       |              |      |   |   |                      |      |   |   |                      |      |   |    |           |      |         |   |                                   |      |         |   |                                   |      |   |    |                          |      |         |   |                     |      |   |   |                                           |      |        |   |                |      |         |   |                     |      |   |   |                   |              |  |                                      |

**LGL-Si** (1.085 g, 3.24 mmol, 2.3 eq) was dissolved in dry DCM (35 mL, 0.1 M), and added to a flame-dried vial under nitrogen. **Sy** linker (0.60 g, 1.41 mmol, 1 eq), DPTS (0.19 g, 0.65 mmol, 0.45 eq) and DCC (0.68 g, 3.3 mmol, 2.3 eq) were then added and allowed to stir at RT overnight. Upon consumption of starting material by TLC, the reaction mixture was filtered to remove DCU, washed with sodium bicarbonate 3x, dried over MgSO<sub>4</sub> and concentrated to yield a pure white solid (1.5 g, 99% yield).



JHS-3019; Si-LGL-Sy-LGL-Si; CDCl<sub>3</sub>; 1H; 400a;  
16 Scans; 10/20/16

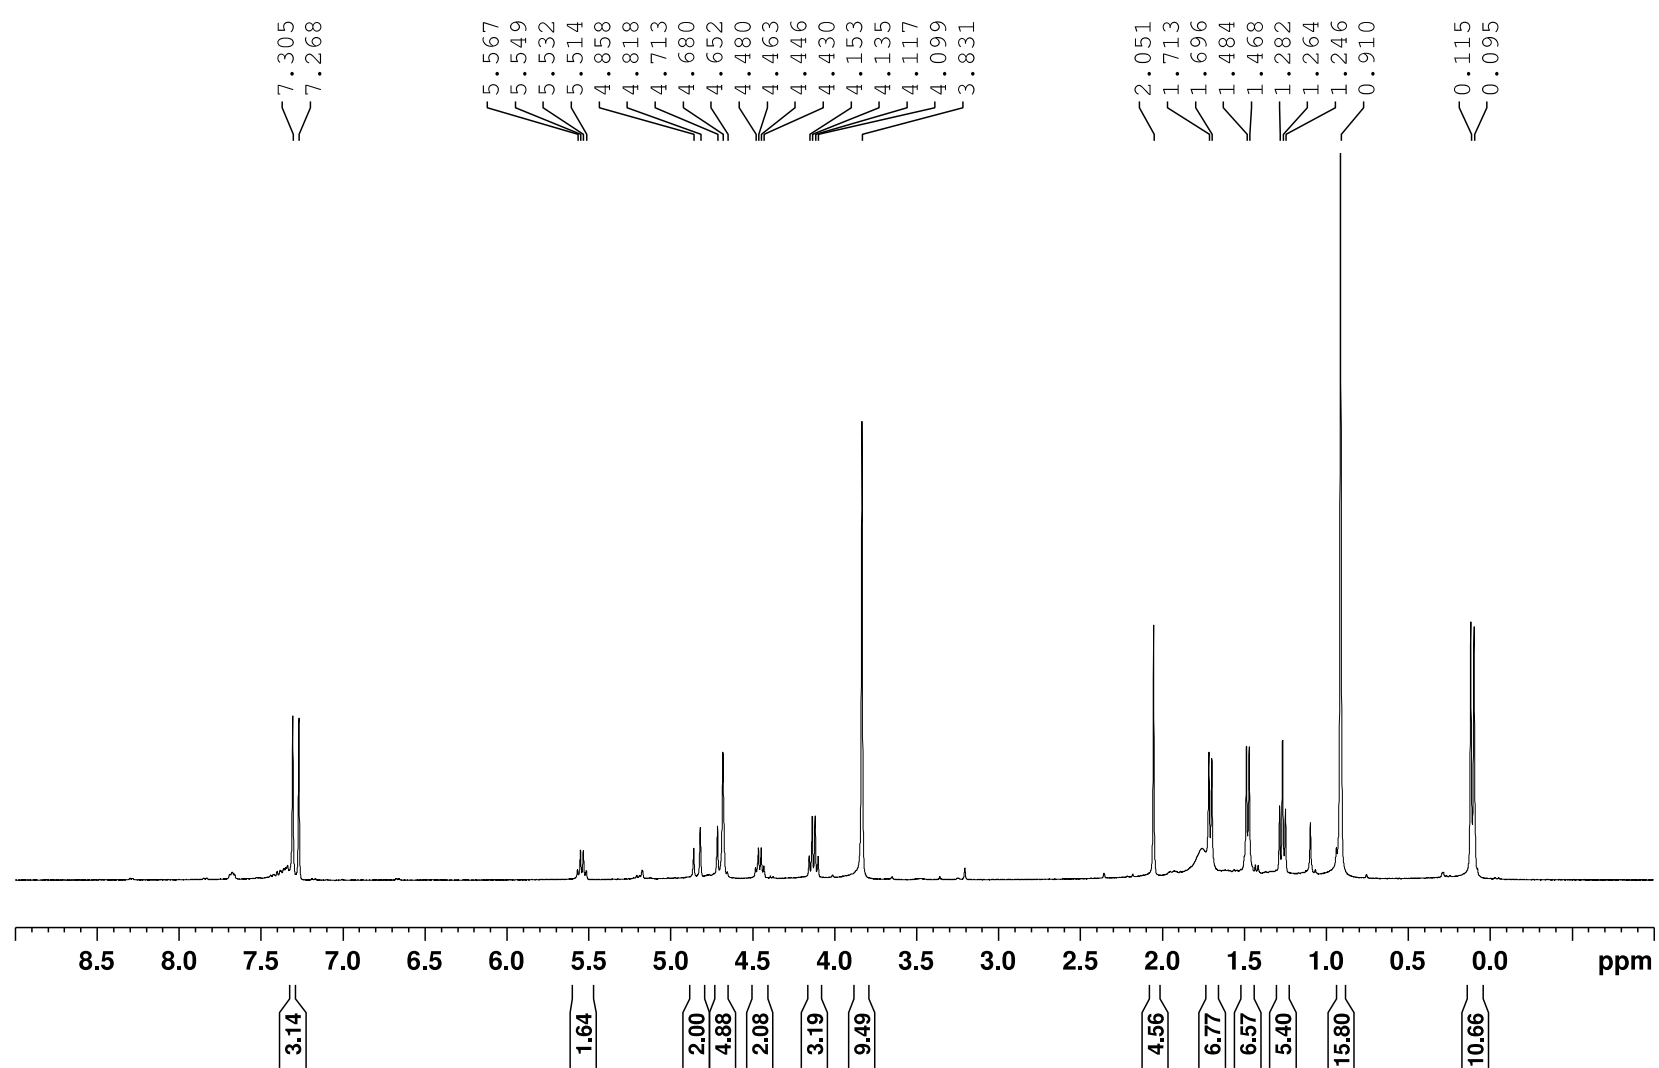

JHS-3019; Si-LGL-Sy-LGL-Si; CDCl<sub>3</sub>; 13C; 400a;  
2048 Scans; 10/20/16

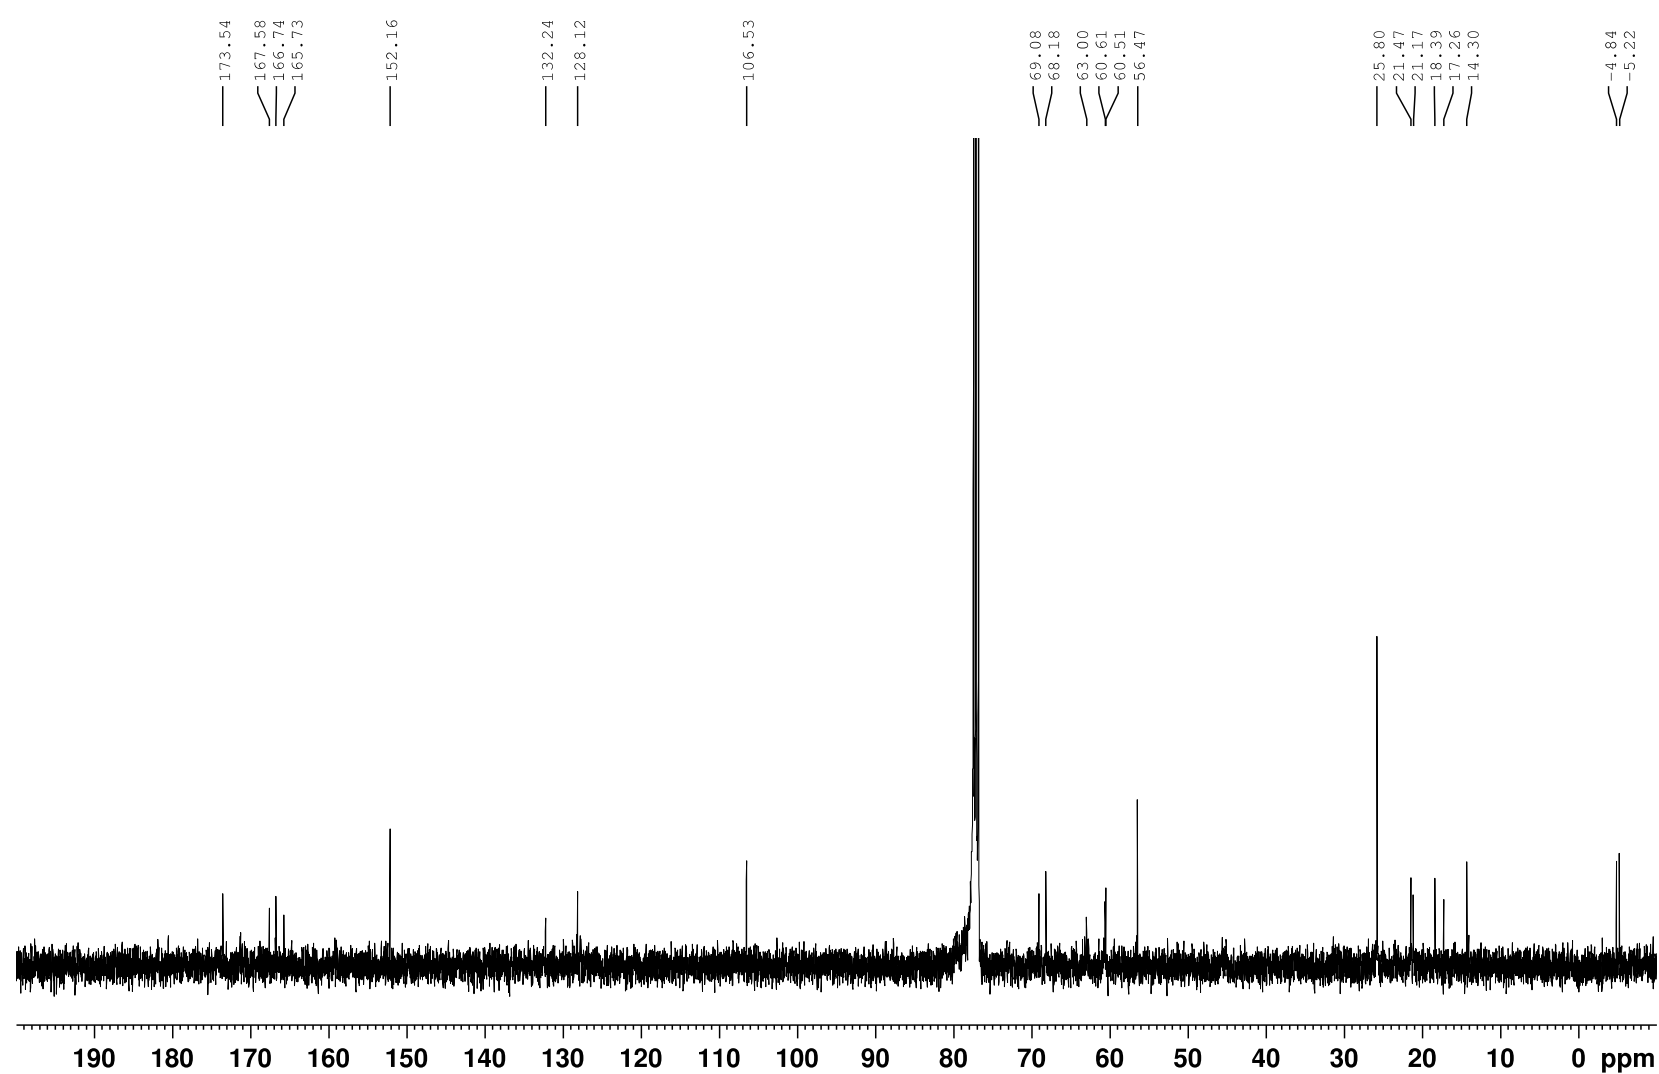

| LGL-Sy-LGL                                                                         |           |      |                                   | <sup>13</sup> C-NMR (400 MHz, CDCl <sub>3</sub> ) |                                   | HRMS (ESI)                                                            |
|------------------------------------------------------------------------------------|-----------|------|-----------------------------------|---------------------------------------------------|-----------------------------------|-----------------------------------------------------------------------|
| 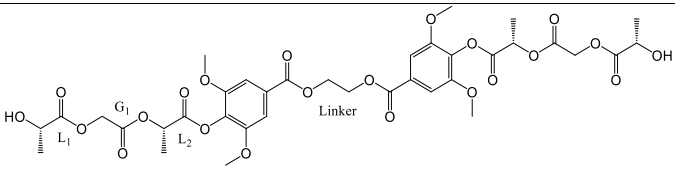 |           |      |                                   | δ (ppm) + Assignment                              |                                   | <u>Calc. Mass</u>                                                     |
|                                                                                    |           |      |                                   | 17.21                                             | CH <sub>3</sub> (L)               | 826.22 amu                                                            |
| <sup>1</sup> H-NMR (400 MHz, CDCl <sub>3</sub> )                                   |           |      |                                   | 20.48                                             | CH <sub>3</sub> (L)               | <u>Calc.</u><br>[M + H] <sup>+</sup><br>827.22 amu                    |
|                                                                                    |           |      |                                   | 56.47                                             | CH <sub>3</sub> (MeO)             |                                                                       |
| dδ (ppm)                                                                           | Mult. (J) | Int. | Assignment                        | 61.04                                             | CH <sub>2</sub> (G <sub>1</sub> ) | <u>Found</u><br>[M + H] <sup>+</sup><br>827.22794 amu                 |
| 1.51                                                                               | d (6.8)   | 6    | CH <sub>3</sub> (L <sub>1</sub> ) | 66.85                                             | CH (L)                            |                                                                       |
| 1.71                                                                               | d (7.1)   | 6    | CH <sub>3</sub> (L <sub>2</sub> ) | 68.37                                             | CH <sub>2</sub> (Linker)          | <u>Composition</u><br>C <sub>36</sub> H <sub>42</sub> O <sub>22</sub> |
| 2.73                                                                               | d (4.5)   | 2    | OH                                | 69.30                                             | CH (L)                            |                                                                       |
| 3.82                                                                               | s         | 12   | CH <sub>3</sub> (Linker)          | 106.50                                            | Aromatic                          |                                                                       |
| 4.42                                                                               | m         | 2    | CH (L <sub>1</sub> )              | 128.17                                            | Aromatic                          |                                                                       |
| 4.67                                                                               | s         | 4    | CH <sub>2</sub> (Linker)          | 132.17                                            | Aromatic                          |                                                                       |
| 4.75                                                                               | d (16)    | 2    | CH <sub>2</sub> (G <sub>1</sub> ) | 152.13                                            | Aromatic                          |                                                                       |
| 4.84                                                                               | d (16)    | 2    | CH <sub>2</sub> (G <sub>1</sub> ) | 165.70                                            | CO                                |                                                                       |
| 5.53                                                                               | q (7.1)   | 2    | CH (L <sub>2</sub> )              | 166.47                                            | CO                                |                                                                       |
| 7.31                                                                               | s         | 4    | Aromatic (Linker)                 | 167.47                                            | CO                                |                                                                       |
|                                                                                    |           |      |                                   | 175.07                                            | CO                                |                                                                       |

AcOH (1.29 mL, 22.7 mmol, 16 eq) and TBAF (1 M in THF) (4.3 mL, 4.3 mmol, 3 eq) dried over activated sieves for two h. **Si-LGL-Sy-LGL-Si** (1.5 g, 1.42 mmol, 1 eq) was dissolved in dry THF (25 mL, 0.04 M) in a flame dried Schlenk flask under nitrogen. AcOH and TBAF were added dropwise at 0°C, allowed to warm to RT and stir for 24 h. An additional equivalent of TBAF was added and allowed to stir for two more h. Upon consumption of starting material by TLC, the reaction mixture was then diluted with brine and extracted with EtOAc 3x, the combined organic layers were washed with brine 3x, dried over MgSO<sub>4</sub> and concentrated. The crude solid was then purified via column chromatography (silica, EtOAc/hexanes) to yield a white solid (0.747 g, 64% yield).

JHS-3020; LGL-Sy-LGL; CDC13; 1H; 400a;  
16 Scans; 10/20/16

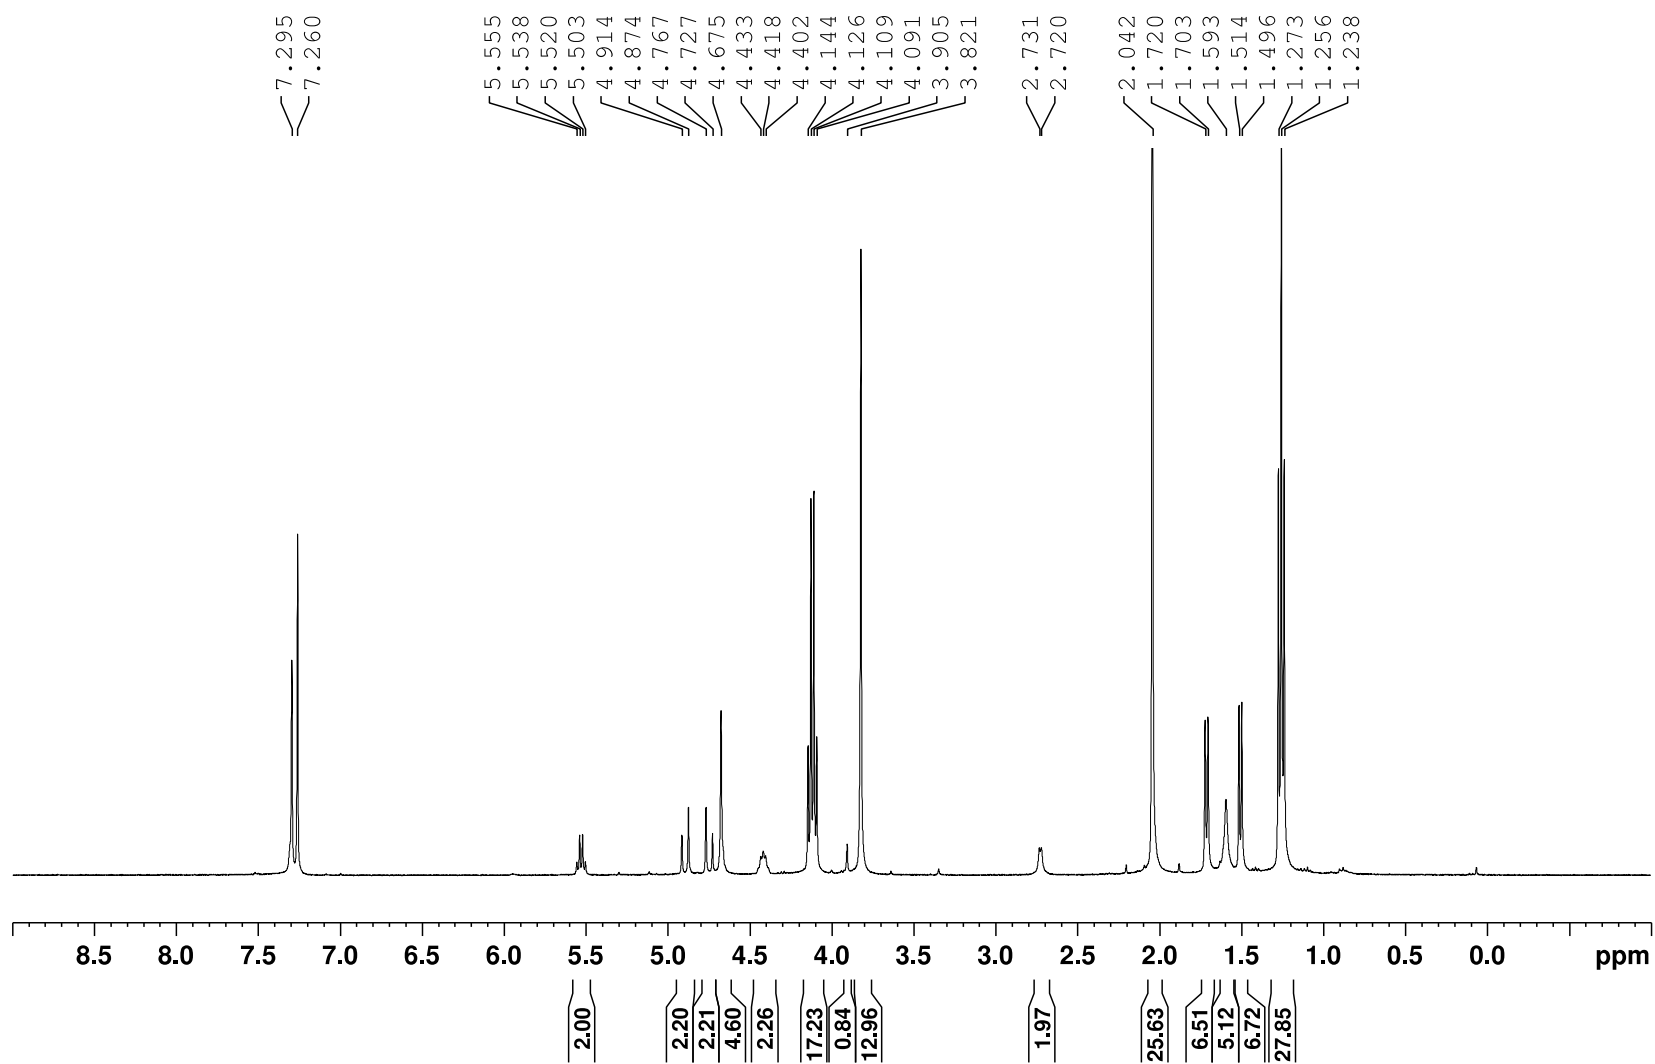

JHS-3020; LGL-Sy-LGL; CDC13; 13C; 400a;  
2048 Scans; 10/20/16

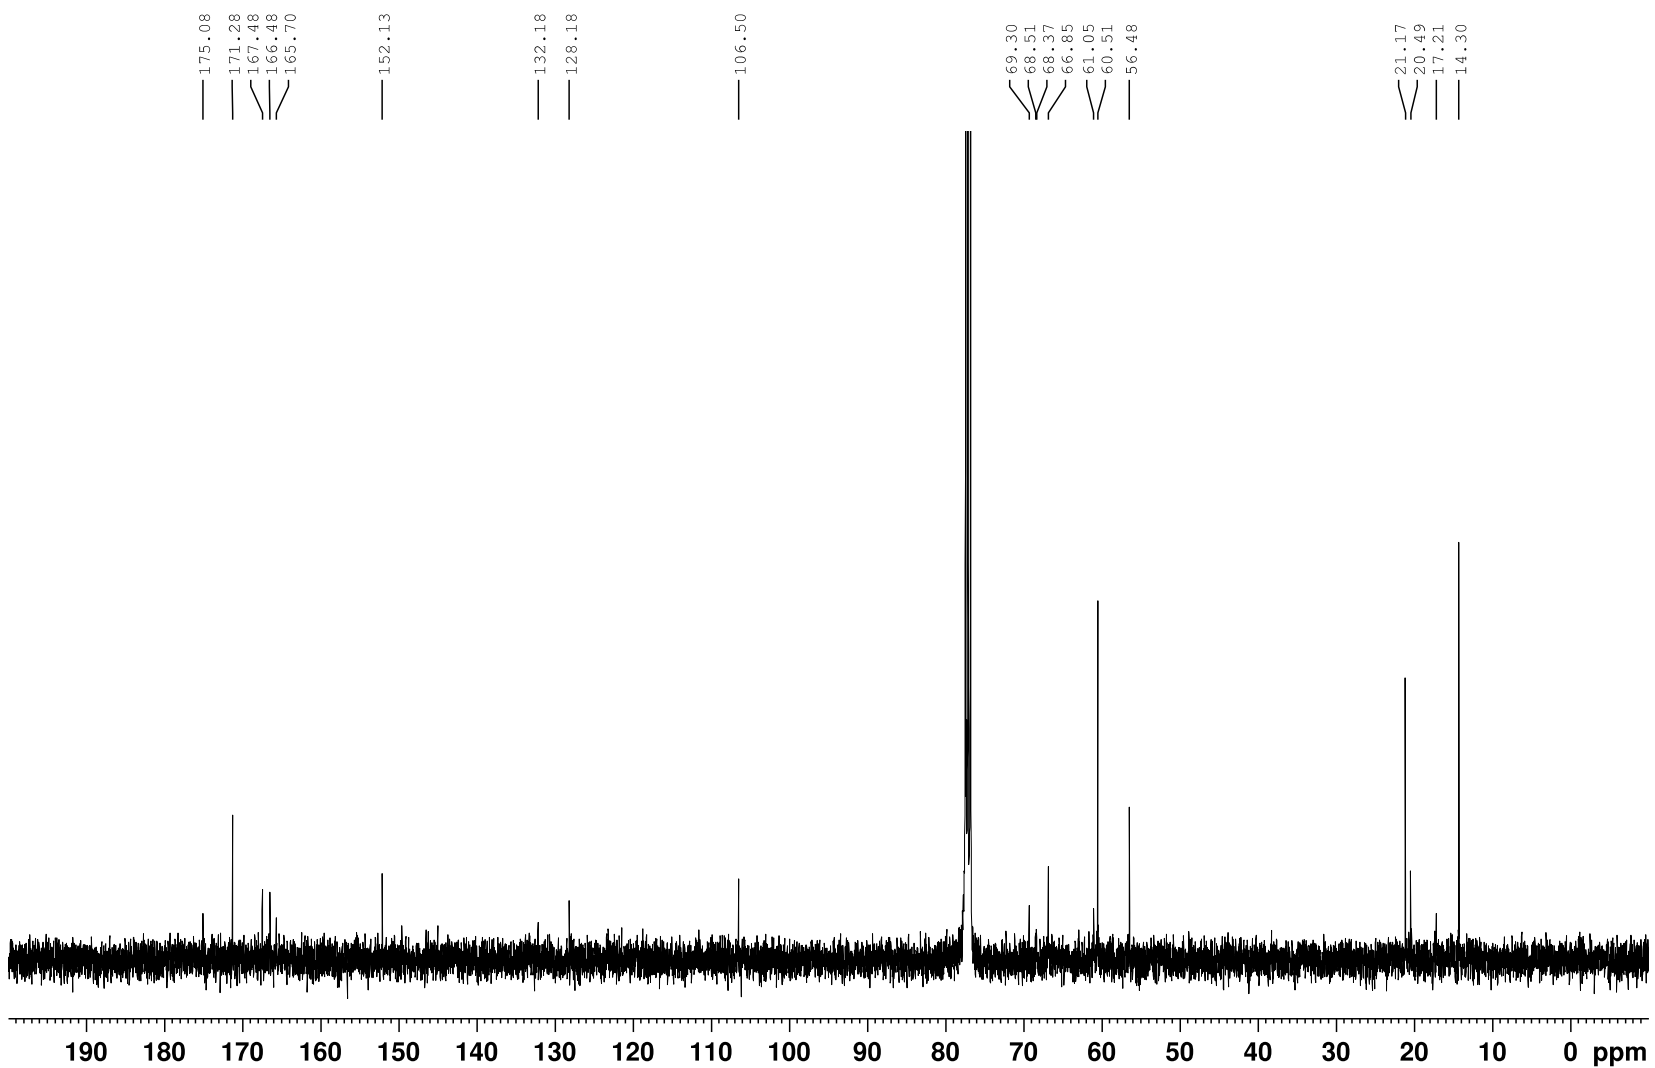

| <b>BLGL-Sy-LGLB</b>                                                                                                                                                                                                                                                                                                                                                                                                                                                                                                                                                                                                                                                                                                                                                                                                                                                                                                                                                                                                                            |        |               |                                            | <sup>13</sup> C-NMR (400 MHz, CDCl <sub>3</sub> ) |              | HRMS (ESI)                                                            |            |            |      |       |   |                                   |      |       |   |                                   |      |   |   |                      |      |   |    |                           |      |       |   |                                            |      |        |   |                                   |      |   |   |                                            |      |       |   |                     |      |   |   |        |      |   |   |                   |                                |  |
|------------------------------------------------------------------------------------------------------------------------------------------------------------------------------------------------------------------------------------------------------------------------------------------------------------------------------------------------------------------------------------------------------------------------------------------------------------------------------------------------------------------------------------------------------------------------------------------------------------------------------------------------------------------------------------------------------------------------------------------------------------------------------------------------------------------------------------------------------------------------------------------------------------------------------------------------------------------------------------------------------------------------------------------------|--------|---------------|--------------------------------------------|---------------------------------------------------|--------------|-----------------------------------------------------------------------|------------|------------|------|-------|---|-----------------------------------|------|-------|---|-----------------------------------|------|---|---|----------------------|------|---|----|---------------------------|------|-------|---|--------------------------------------------|------|--------|---|-----------------------------------|------|---|---|--------------------------------------------|------|-------|---|---------------------|------|---|---|--------|------|---|---|-------------------|--------------------------------|--|
| 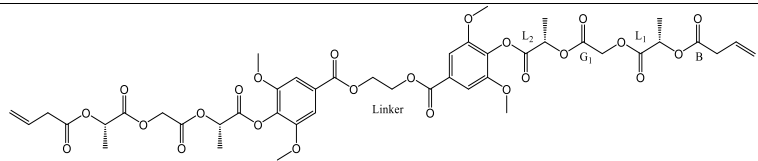                                                                                                                                                                                                                                                                                                                                                                                                                                                                                                                                                                                                                                                                                                                                                                                                                                                                                                                                                             |        |               |                                            | $\delta$ (ppm) + Assignment                       |              | <u>Calc. Mass</u>                                                     |            |            |      |       |   |                                   |      |       |   |                                   |      |   |   |                      |      |   |    |                           |      |       |   |                                            |      |        |   |                                   |      |   |   |                                            |      |       |   |                     |      |   |   |        |      |   |   |                   |                                |  |
|                                                                                                                                                                                                                                                                                                                                                                                                                                                                                                                                                                                                                                                                                                                                                                                                                                                                                                                                                                                                                                                |        |               |                                            | 16.96 CH <sub>3</sub>                             |              | 962.27 amu                                                            |            |            |      |       |   |                                   |      |       |   |                                   |      |   |   |                      |      |   |    |                           |      |       |   |                                            |      |        |   |                                   |      |   |   |                                            |      |       |   |                     |      |   |   |        |      |   |   |                   |                                |  |
| <sup>1</sup> H-NMR (400 MHz, CDCl <sub>3</sub> )                                                                                                                                                                                                                                                                                                                                                                                                                                                                                                                                                                                                                                                                                                                                                                                                                                                                                                                                                                                               |        |               |                                            | 17.23 CH <sub>3</sub>                             |              | <u>Calc.</u><br>[M + H] <sup>+</sup>                                  |            |            |      |       |   |                                   |      |       |   |                                   |      |   |   |                      |      |   |    |                           |      |       |   |                                            |      |        |   |                                   |      |   |   |                                            |      |       |   |                     |      |   |   |        |      |   |   |                   |                                |  |
|                                                                                                                                                                                                                                                                                                                                                                                                                                                                                                                                                                                                                                                                                                                                                                                                                                                                                                                                                                                                                                                |        |               |                                            | 38.73 CH <sub>2</sub> (Linker)                    |              |                                                                       | 963.27 amu |            |      |       |   |                                   |      |       |   |                                   |      |   |   |                      |      |   |    |                           |      |       |   |                                            |      |        |   |                                   |      |   |   |                                            |      |       |   |                     |      |   |   |        |      |   |   |                   |                                |  |
| <table border="1"> <thead> <tr> <th>d<math>\delta</math> (ppm)</th> <th>Mult. (J Hz)</th> <th>Int.</th> <th>Assignment</th> </tr> </thead> <tbody> <tr> <td>1.59</td> <td>d (7)</td> <td>6</td> <td>L<sub>1</sub> (CH<sub>3</sub>)</td> </tr> <tr> <td>1.71</td> <td>d (7)</td> <td>6</td> <td>L<sub>2</sub> (CH<sub>3</sub>)</td> </tr> <tr> <td>3.19</td> <td>m</td> <td>4</td> <td>B (CH<sub>2</sub>)</td> </tr> <tr> <td>3.83</td> <td>s</td> <td>12</td> <td>Linker (CH<sub>3</sub>)</td> </tr> <tr> <td>4.66</td> <td>s + d</td> <td>6</td> <td>Linker (CH<sub>2</sub>) + G<sub>1</sub></td> </tr> <tr> <td>4.92</td> <td>d (16)</td> <td>2</td> <td>G<sub>1</sub> (CH<sub>2</sub>)</td> </tr> <tr> <td>5.21</td> <td>m</td> <td>6</td> <td>L<sub>1</sub> (CH) + B (CH<sub>2</sub>)</td> </tr> <tr> <td>5.53</td> <td>q (7)</td> <td>2</td> <td>L<sub>2</sub> (CH)</td> </tr> <tr> <td>5.94</td> <td>m</td> <td>2</td> <td>B (CH)</td> </tr> <tr> <td>7.31</td> <td>s</td> <td>4</td> <td>Linker (Aromatic)</td> </tr> </tbody> </table> |        |               |                                            | d $\delta$ (ppm)                                  | Mult. (J Hz) | Int.                                                                  |            | Assignment | 1.59 | d (7) | 6 | L <sub>1</sub> (CH <sub>3</sub> ) | 1.71 | d (7) | 6 | L <sub>2</sub> (CH <sub>3</sub> ) | 3.19 | m | 4 | B (CH <sub>2</sub> ) | 3.83 | s | 12 | Linker (CH <sub>3</sub> ) | 4.66 | s + d | 6 | Linker (CH <sub>2</sub> ) + G <sub>1</sub> | 4.92 | d (16) | 2 | G <sub>1</sub> (CH <sub>2</sub> ) | 5.21 | m | 6 | L <sub>1</sub> (CH) + B (CH <sub>2</sub> ) | 5.53 | q (7) | 2 | L <sub>2</sub> (CH) | 5.94 | m | 2 | B (CH) | 7.31 | s | 4 | Linker (Aromatic) | 56.51 CH <sub>3</sub> (Linker) |  |
|                                                                                                                                                                                                                                                                                                                                                                                                                                                                                                                                                                                                                                                                                                                                                                                                                                                                                                                                                                                                                                                |        |               |                                            | d $\delta$ (ppm)                                  | Mult. (J Hz) | Int.                                                                  | Assignment |            |      |       |   |                                   |      |       |   |                                   |      |   |   |                      |      |   |    |                           |      |       |   |                                            |      |        |   |                                   |      |   |   |                                            |      |       |   |                     |      |   |   |        |      |   |   |                   |                                |  |
| 1.59                                                                                                                                                                                                                                                                                                                                                                                                                                                                                                                                                                                                                                                                                                                                                                                                                                                                                                                                                                                                                                           | d (7)  | 6             | L <sub>1</sub> (CH <sub>3</sub> )          |                                                   |              |                                                                       |            |            |      |       |   |                                   |      |       |   |                                   |      |   |   |                      |      |   |    |                           |      |       |   |                                            |      |        |   |                                   |      |   |   |                                            |      |       |   |                     |      |   |   |        |      |   |   |                   |                                |  |
| 1.71                                                                                                                                                                                                                                                                                                                                                                                                                                                                                                                                                                                                                                                                                                                                                                                                                                                                                                                                                                                                                                           | d (7)  | 6             | L <sub>2</sub> (CH <sub>3</sub> )          |                                                   |              |                                                                       |            |            |      |       |   |                                   |      |       |   |                                   |      |   |   |                      |      |   |    |                           |      |       |   |                                            |      |        |   |                                   |      |   |   |                                            |      |       |   |                     |      |   |   |        |      |   |   |                   |                                |  |
| 3.19                                                                                                                                                                                                                                                                                                                                                                                                                                                                                                                                                                                                                                                                                                                                                                                                                                                                                                                                                                                                                                           | m      | 4             | B (CH <sub>2</sub> )                       |                                                   |              |                                                                       |            |            |      |       |   |                                   |      |       |   |                                   |      |   |   |                      |      |   |    |                           |      |       |   |                                            |      |        |   |                                   |      |   |   |                                            |      |       |   |                     |      |   |   |        |      |   |   |                   |                                |  |
| 3.83                                                                                                                                                                                                                                                                                                                                                                                                                                                                                                                                                                                                                                                                                                                                                                                                                                                                                                                                                                                                                                           | s      | 12            | Linker (CH <sub>3</sub> )                  |                                                   |              |                                                                       |            |            |      |       |   |                                   |      |       |   |                                   |      |   |   |                      |      |   |    |                           |      |       |   |                                            |      |        |   |                                   |      |   |   |                                            |      |       |   |                     |      |   |   |        |      |   |   |                   |                                |  |
| 4.66                                                                                                                                                                                                                                                                                                                                                                                                                                                                                                                                                                                                                                                                                                                                                                                                                                                                                                                                                                                                                                           | s + d  | 6             | Linker (CH <sub>2</sub> ) + G <sub>1</sub> |                                                   |              |                                                                       |            |            |      |       |   |                                   |      |       |   |                                   |      |   |   |                      |      |   |    |                           |      |       |   |                                            |      |        |   |                                   |      |   |   |                                            |      |       |   |                     |      |   |   |        |      |   |   |                   |                                |  |
| 4.92                                                                                                                                                                                                                                                                                                                                                                                                                                                                                                                                                                                                                                                                                                                                                                                                                                                                                                                                                                                                                                           | d (16) | 2             | G <sub>1</sub> (CH <sub>2</sub> )          |                                                   |              |                                                                       |            |            |      |       |   |                                   |      |       |   |                                   |      |   |   |                      |      |   |    |                           |      |       |   |                                            |      |        |   |                                   |      |   |   |                                            |      |       |   |                     |      |   |   |        |      |   |   |                   |                                |  |
| 5.21                                                                                                                                                                                                                                                                                                                                                                                                                                                                                                                                                                                                                                                                                                                                                                                                                                                                                                                                                                                                                                           | m      | 6             | L <sub>1</sub> (CH) + B (CH <sub>2</sub> ) |                                                   |              |                                                                       |            |            |      |       |   |                                   |      |       |   |                                   |      |   |   |                      |      |   |    |                           |      |       |   |                                            |      |        |   |                                   |      |   |   |                                            |      |       |   |                     |      |   |   |        |      |   |   |                   |                                |  |
| 5.53                                                                                                                                                                                                                                                                                                                                                                                                                                                                                                                                                                                                                                                                                                                                                                                                                                                                                                                                                                                                                                           | q (7)  | 2             | L <sub>2</sub> (CH)                        |                                                   |              |                                                                       |            |            |      |       |   |                                   |      |       |   |                                   |      |   |   |                      |      |   |    |                           |      |       |   |                                            |      |        |   |                                   |      |   |   |                                            |      |       |   |                     |      |   |   |        |      |   |   |                   |                                |  |
| 5.94                                                                                                                                                                                                                                                                                                                                                                                                                                                                                                                                                                                                                                                                                                                                                                                                                                                                                                                                                                                                                                           | m      | 2             | B (CH)                                     |                                                   |              |                                                                       |            |            |      |       |   |                                   |      |       |   |                                   |      |   |   |                      |      |   |    |                           |      |       |   |                                            |      |        |   |                                   |      |   |   |                                            |      |       |   |                     |      |   |   |        |      |   |   |                   |                                |  |
| 7.31                                                                                                                                                                                                                                                                                                                                                                                                                                                                                                                                                                                                                                                                                                                                                                                                                                                                                                                                                                                                                                           | s      | 4             | Linker (Aromatic)                          |                                                   |              |                                                                       |            |            |      |       |   |                                   |      |       |   |                                   |      |   |   |                      |      |   |    |                           |      |       |   |                                            |      |        |   |                                   |      |   |   |                                            |      |       |   |                     |      |   |   |        |      |   |   |                   |                                |  |
| 60.91 CH <sub>2</sub>                                                                                                                                                                                                                                                                                                                                                                                                                                                                                                                                                                                                                                                                                                                                                                                                                                                                                                                                                                                                                          |        | 963.28008 amu |                                            |                                                   |              |                                                                       |            |            |      |       |   |                                   |      |       |   |                                   |      |   |   |                      |      |   |    |                           |      |       |   |                                            |      |        |   |                                   |      |   |   |                                            |      |       |   |                     |      |   |   |        |      |   |   |                   |                                |  |
|                                                                                                                                                                                                                                                                                                                                                                                                                                                                                                                                                                                                                                                                                                                                                                                                                                                                                                                                                                                                                                                |        |               |                                            | 63.02 CH <sub>2</sub>                             |              | <u>Composition</u><br>C <sub>44</sub> H <sub>50</sub> O <sub>24</sub> |            |            |      |       |   |                                   |      |       |   |                                   |      |   |   |                      |      |   |    |                           |      |       |   |                                            |      |        |   |                                   |      |   |   |                                            |      |       |   |                     |      |   |   |        |      |   |   |                   |                                |  |
|                                                                                                                                                                                                                                                                                                                                                                                                                                                                                                                                                                                                                                                                                                                                                                                                                                                                                                                                                                                                                                                |        |               |                                            | 68.58 CH                                          |              |                                                                       |            |            |      |       |   |                                   |      |       |   |                                   |      |   |   |                      |      |   |    |                           |      |       |   |                                            |      |        |   |                                   |      |   |   |                                            |      |       |   |                     |      |   |   |        |      |   |   |                   |                                |  |
|                                                                                                                                                                                                                                                                                                                                                                                                                                                                                                                                                                                                                                                                                                                                                                                                                                                                                                                                                                                                                                                |        |               |                                            | 69.25 CH                                          |              |                                                                       |            |            |      |       |   |                                   |      |       |   |                                   |      |   |   |                      |      |   |    |                           |      |       |   |                                            |      |        |   |                                   |      |   |   |                                            |      |       |   |                     |      |   |   |        |      |   |   |                   |                                |  |
|                                                                                                                                                                                                                                                                                                                                                                                                                                                                                                                                                                                                                                                                                                                                                                                                                                                                                                                                                                                                                                                |        |               |                                            | 106.55 Aromatic                                   |              |                                                                       |            |            |      |       |   |                                   |      |       |   |                                   |      |   |   |                      |      |   |    |                           |      |       |   |                                            |      |        |   |                                   |      |   |   |                                            |      |       |   |                     |      |   |   |        |      |   |   |                   |                                |  |
|                                                                                                                                                                                                                                                                                                                                                                                                                                                                                                                                                                                                                                                                                                                                                                                                                                                                                                                                                                                                                                                |        |               |                                            | 119.12 Aromatic                                   |              |                                                                       |            |            |      |       |   |                                   |      |       |   |                                   |      |   |   |                      |      |   |    |                           |      |       |   |                                            |      |        |   |                                   |      |   |   |                                            |      |       |   |                     |      |   |   |        |      |   |   |                   |                                |  |
|                                                                                                                                                                                                                                                                                                                                                                                                                                                                                                                                                                                                                                                                                                                                                                                                                                                                                                                                                                                                                                                |        |               |                                            | 128.18 Aromatic                                   |              |                                                                       |            |            |      |       |   |                                   |      |       |   |                                   |      |   |   |                      |      |   |    |                           |      |       |   |                                            |      |        |   |                                   |      |   |   |                                            |      |       |   |                     |      |   |   |        |      |   |   |                   |                                |  |
|                                                                                                                                                                                                                                                                                                                                                                                                                                                                                                                                                                                                                                                                                                                                                                                                                                                                                                                                                                                                                                                |        |               |                                            | 129.75 Aromatic                                   |              |                                                                       |            |            |      |       |   |                                   |      |       |   |                                   |      |   |   |                      |      |   |    |                           |      |       |   |                                            |      |        |   |                                   |      |   |   |                                            |      |       |   |                     |      |   |   |        |      |   |   |                   |                                |  |
|                                                                                                                                                                                                                                                                                                                                                                                                                                                                                                                                                                                                                                                                                                                                                                                                                                                                                                                                                                                                                                                |        |               |                                            | 132.25 Alkene                                     |              |                                                                       |            |            |      |       |   |                                   |      |       |   |                                   |      |   |   |                      |      |   |    |                           |      |       |   |                                            |      |        |   |                                   |      |   |   |                                            |      |       |   |                     |      |   |   |        |      |   |   |                   |                                |  |
|                                                                                                                                                                                                                                                                                                                                                                                                                                                                                                                                                                                                                                                                                                                                                                                                                                                                                                                                                                                                                                                |        |               |                                            | 152.18 Alkene                                     |              |                                                                       |            |            |      |       |   |                                   |      |       |   |                                   |      |   |   |                      |      |   |    |                           |      |       |   |                                            |      |        |   |                                   |      |   |   |                                            |      |       |   |                     |      |   |   |        |      |   |   |                   |                                |  |
|                                                                                                                                                                                                                                                                                                                                                                                                                                                                                                                                                                                                                                                                                                                                                                                                                                                                                                                                                                                                                                                |        |               |                                            | 165.74 CO                                         |              |                                                                       |            |            |      |       |   |                                   |      |       |   |                                   |      |   |   |                      |      |   |    |                           |      |       |   |                                            |      |        |   |                                   |      |   |   |                                            |      |       |   |                     |      |   |   |        |      |   |   |                   |                                |  |
|                                                                                                                                                                                                                                                                                                                                                                                                                                                                                                                                                                                                                                                                                                                                                                                                                                                                                                                                                                                                                                                |        |               |                                            | 166.48 CO                                         |              |                                                                       |            |            |      |       |   |                                   |      |       |   |                                   |      |   |   |                      |      |   |    |                           |      |       |   |                                            |      |        |   |                                   |      |   |   |                                            |      |       |   |                     |      |   |   |        |      |   |   |                   |                                |  |
|                                                                                                                                                                                                                                                                                                                                                                                                                                                                                                                                                                                                                                                                                                                                                                                                                                                                                                                                                                                                                                                |        |               |                                            | 167.55 CO                                         |              |                                                                       |            |            |      |       |   |                                   |      |       |   |                                   |      |   |   |                      |      |   |    |                           |      |       |   |                                            |      |        |   |                                   |      |   |   |                                            |      |       |   |                     |      |   |   |        |      |   |   |                   |                                |  |
|                                                                                                                                                                                                                                                                                                                                                                                                                                                                                                                                                                                                                                                                                                                                                                                                                                                                                                                                                                                                                                                |        |               |                                            | 170.26 CO                                         |              |                                                                       |            |            |      |       |   |                                   |      |       |   |                                   |      |   |   |                      |      |   |    |                           |      |       |   |                                            |      |        |   |                                   |      |   |   |                                            |      |       |   |                     |      |   |   |        |      |   |   |                   |                                |  |
|                                                                                                                                                                                                                                                                                                                                                                                                                                                                                                                                                                                                                                                                                                                                                                                                                                                                                                                                                                                                                                                |        |               |                                            | 171.02 CO                                         |              |                                                                       |            |            |      |       |   |                                   |      |       |   |                                   |      |   |   |                      |      |   |    |                           |      |       |   |                                            |      |        |   |                                   |      |   |   |                                            |      |       |   |                     |      |   |   |        |      |   |   |                   |                                |  |

**LGL-Sy-LGL** (0.74 g, 0.90 mmol, 1 eq) was dissolved in dry EtOAc (10 mL, 0.1 M) in an oven dried vial under nitrogen. DPTS (0.121 g, 0.41 mmol, 0.45 eq) and DCC (0.56 g, 2.7 mmol, 3 eq) were added sequentially. Butenoic acid (0.232 g, 2.7 mmol, 3 eq) was then added dropwise and allowed to stir at RT overnight. Upon consumption of starting material by TLC, the reaction mixture was diluted with hexanes, washed with sodium bicarbonate 3x, dried over MgSO<sub>4</sub> and filtered to remove DCU and drying agent, concentrated, and crude oil was purified via column chromatography (silica, EtOAc/hexanes) to yield a colorless oil (612 mg, 71% yield).

JHS-3021; BLGL-Sy-LGLB; CDC13; 1H; 400a;  
16 Scans; 10/21/16

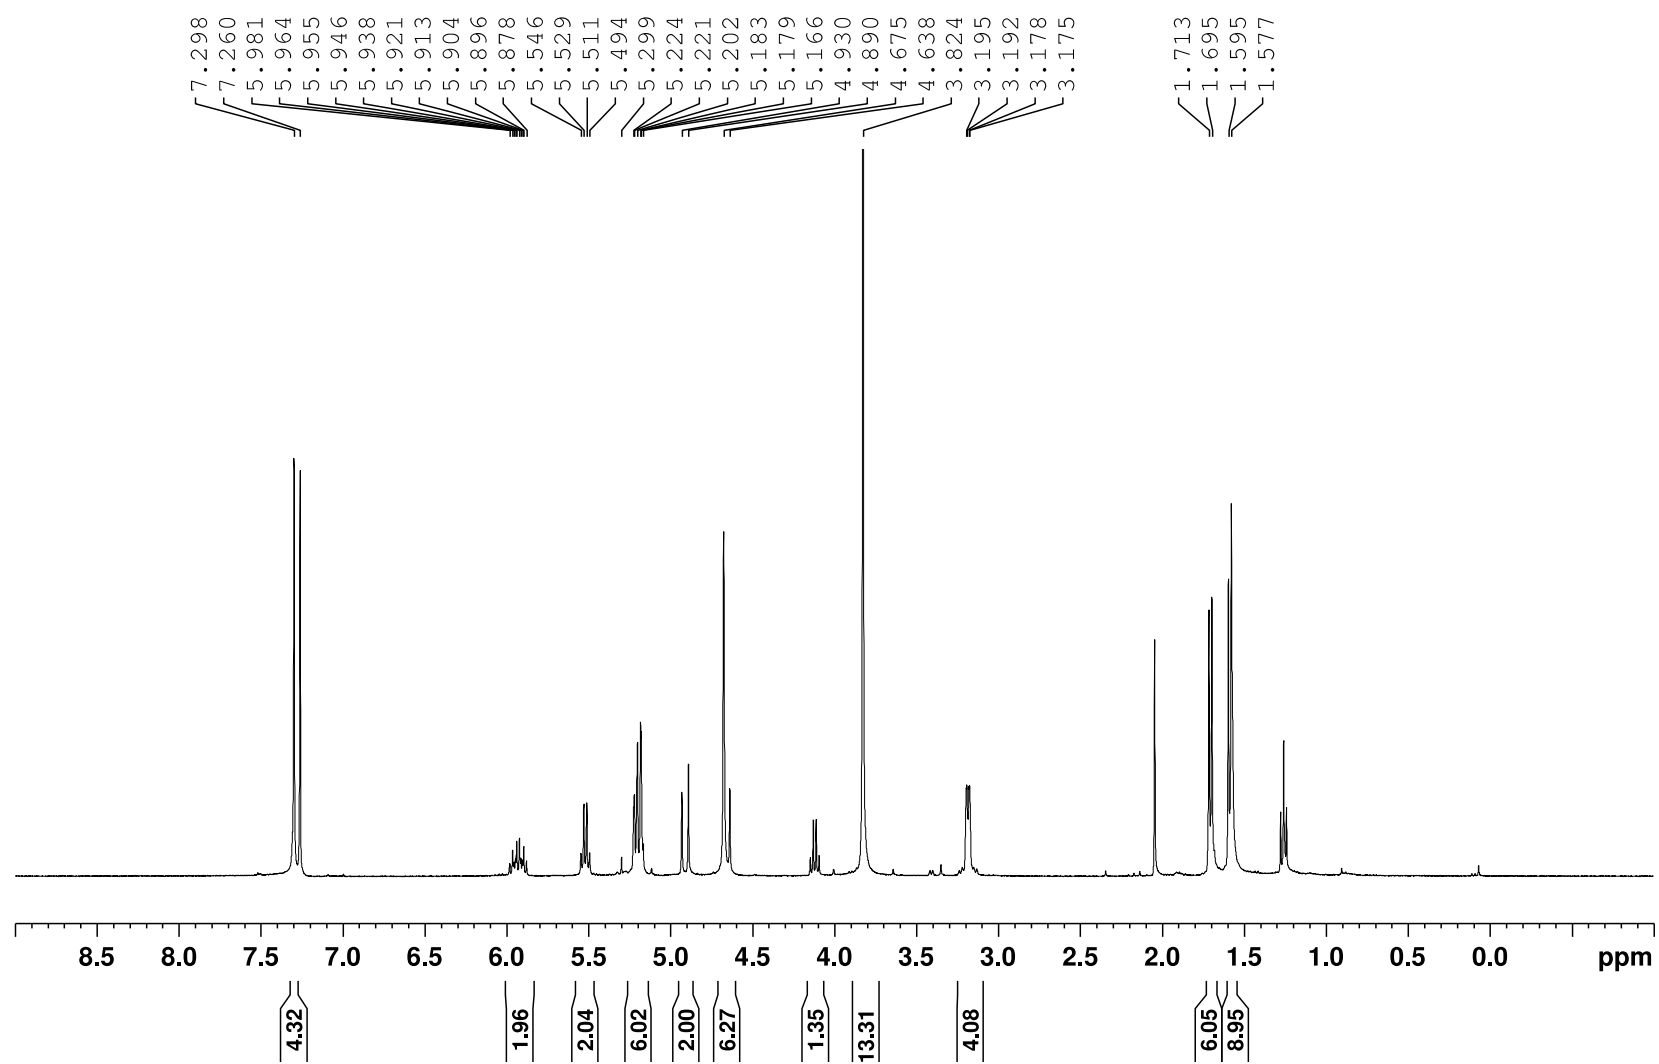

JHS-3021; BLGL-Sy-LGLB; CDC13; 13C; 400a;  
2048 Scans; 10/21/16

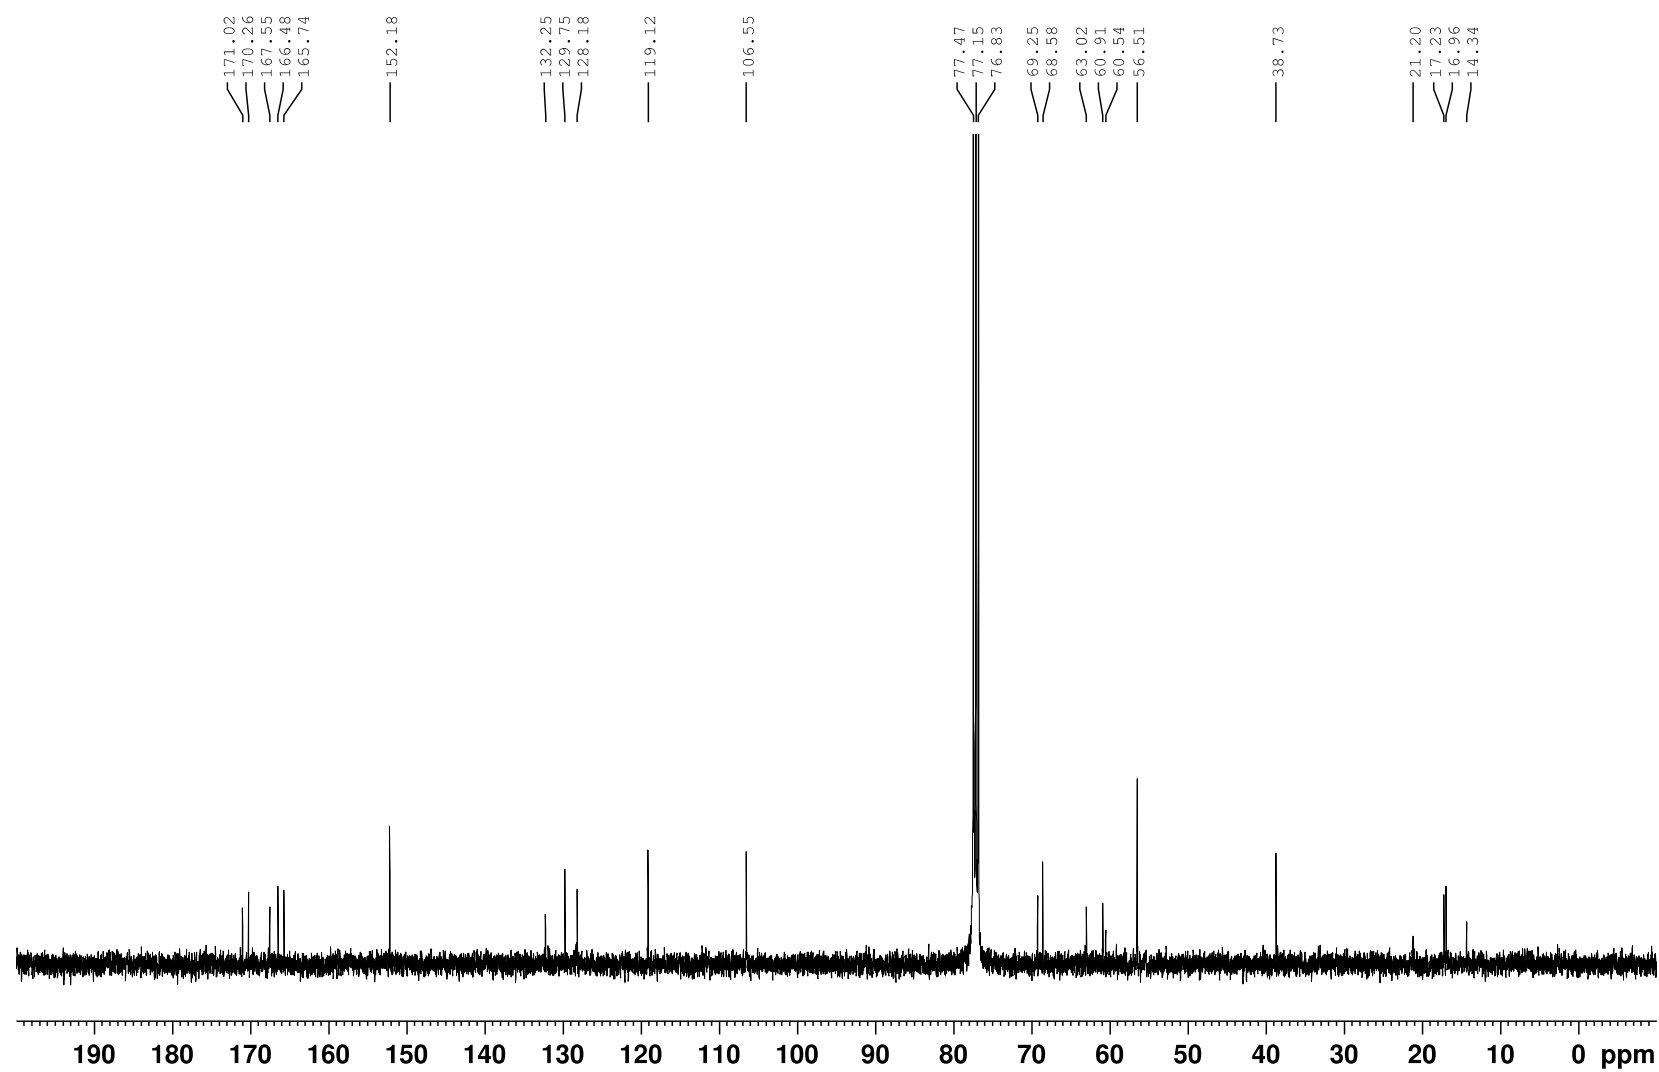

| Cyclic Sy Monomer                                                                 |              |      |                                   | <sup>13</sup> C-NMR (400 MHz, CDCl <sub>3</sub> ) | HRMS (ESI)                                      |
|-----------------------------------------------------------------------------------|--------------|------|-----------------------------------|---------------------------------------------------|-------------------------------------------------|
| 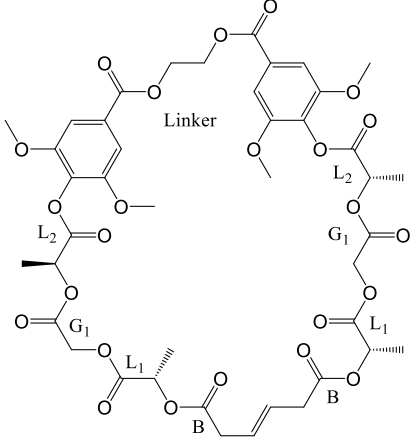 |              |      |                                   | $\delta$ (ppm) + Assignment                       | <u>Calc. Mass</u>                               |
|                                                                                   |              |      |                                   | 16.68 CH <sub>3</sub> (L)                         | 934.24 amu                                      |
|                                                                                   |              |      |                                   | 16.91 CH <sub>3</sub> (L)                         |                                                 |
|                                                                                   |              |      |                                   | 32.63 CH <sub>2</sub> (Linker)                    | <u>Calc.</u>                                    |
|                                                                                   |              |      |                                   | 37.28 CH <sub>2</sub> (B)                         | [M + H] <sup>+</sup>                            |
|                                                                                   |              |      |                                   | 56.27 CH <sub>3</sub> (Linker)                    | 935.24 amu                                      |
|                                                                                   |              |      |                                   | 60.77 CH <sub>2</sub> (G)                         |                                                 |
|                                                                                   |              |      |                                   | 62.66 CH (L)                                      | <u>Found</u>                                    |
|                                                                                   |              |      |                                   | 68.42 CH (L)                                      | [M + H] <sup>+</sup>                            |
|                                                                                   |              |      |                                   | 69.08 CH <sub>2</sub> (Linker)                    | 935.25000 amu                                   |
|                                                                                   |              |      |                                   | 106.38 Aromatic                                   |                                                 |
|                                                                                   |              |      |                                   | 124.44 Alkene (Cis)                               | <u>Composition</u>                              |
|                                                                                   |              |      |                                   | 125.65 Alkene                                     | C <sub>42</sub> H <sub>46</sub> O <sub>24</sub> |
|                                                                                   |              |      |                                   | 128.04 Aromatic                                   |                                                 |
|                                                                                   |              |      |                                   | 132.13 Aromatic                                   |                                                 |
|                                                                                   |              |      |                                   | 152.02 Aromatic                                   |                                                 |
|                                                                                   |              |      |                                   | 165.43 CO                                         |                                                 |
|                                                                                   |              |      |                                   | 166.15 CO                                         |                                                 |
|                                                                                   |              |      |                                   | 167.14 CO                                         |                                                 |
|                                                                                   |              |      |                                   | 169.77 CO                                         |                                                 |
|                                                                                   |              |      |                                   | 170.49 CO                                         |                                                 |
| <sup>1</sup> H-NMR (400 MHz, CDCl <sub>3</sub> )                                  |              |      |                                   |                                                   |                                                 |
| d $\delta$ (ppm)                                                                  | Mult. (J Hz) | Int. | Assignment                        |                                                   |                                                 |
| 1.57                                                                              | d (7)        | 6    | CH <sub>3</sub> (L <sub>1</sub> ) |                                                   |                                                 |
| 1.71                                                                              | d (7)        | 6    | CH <sub>3</sub> (L <sub>2</sub> ) |                                                   |                                                 |
| 3.19                                                                              | m            | 4    | CH <sub>2</sub> (B)               |                                                   |                                                 |
| 3.81                                                                              | s            | 12   | -OCH <sub>3</sub> (Linker)        |                                                   |                                                 |
| 4.69                                                                              | s            | 6    | CH <sub>2</sub> (Linker)          |                                                   |                                                 |
| 4.75                                                                              | d (16)       | 2    | CH <sub>2</sub> (G <sub>1</sub> ) |                                                   |                                                 |
| 4.86                                                                              | d (16)       | 2    | CH <sub>2</sub> (G <sub>1</sub> ) |                                                   |                                                 |
| 5.24                                                                              | q (7)        | 2    | CH (L <sub>1</sub> )              |                                                   |                                                 |
| 5.52                                                                              | q (7)        | 2    | CH (L <sub>2</sub> )              |                                                   |                                                 |
| 5.76                                                                              | m            | 1.6  | CH (B) Trans                      |                                                   |                                                 |
| 5.83                                                                              | m            | 0.4  | CH (B) Cis                        |                                                   |                                                 |
| 7.30                                                                              | s            | 4    | Aromatic                          |                                                   |                                                 |

**BLGL-Sy-LGLB** (610 mg, 0.634 mmol, 1 eq) was dissolved in dry DCM (630 mL, 0.001M) in a flame-dried Schlenk flask under nitrogen. A stock solution of Grubbs 2 (54 mg, 0.063 mmol, 10 mol%) in dry DCM was added and allowed to stir at RT overnight. Upon consumption of starting material by TLC, reaction mixture was quenched by addition of excess ethyl vinyl ether and stirring for 10 additional min. The reaction mixture was then concentrated and the crude solid was purified via column chromatography (silica, EtOAc/hexanes) to yield a brown solid (470 mg, 79% yield).

JHS-3022; Sy Monomer; CDCl<sub>3</sub>; 1H; 400a;  
16 Scans; 10/26/16

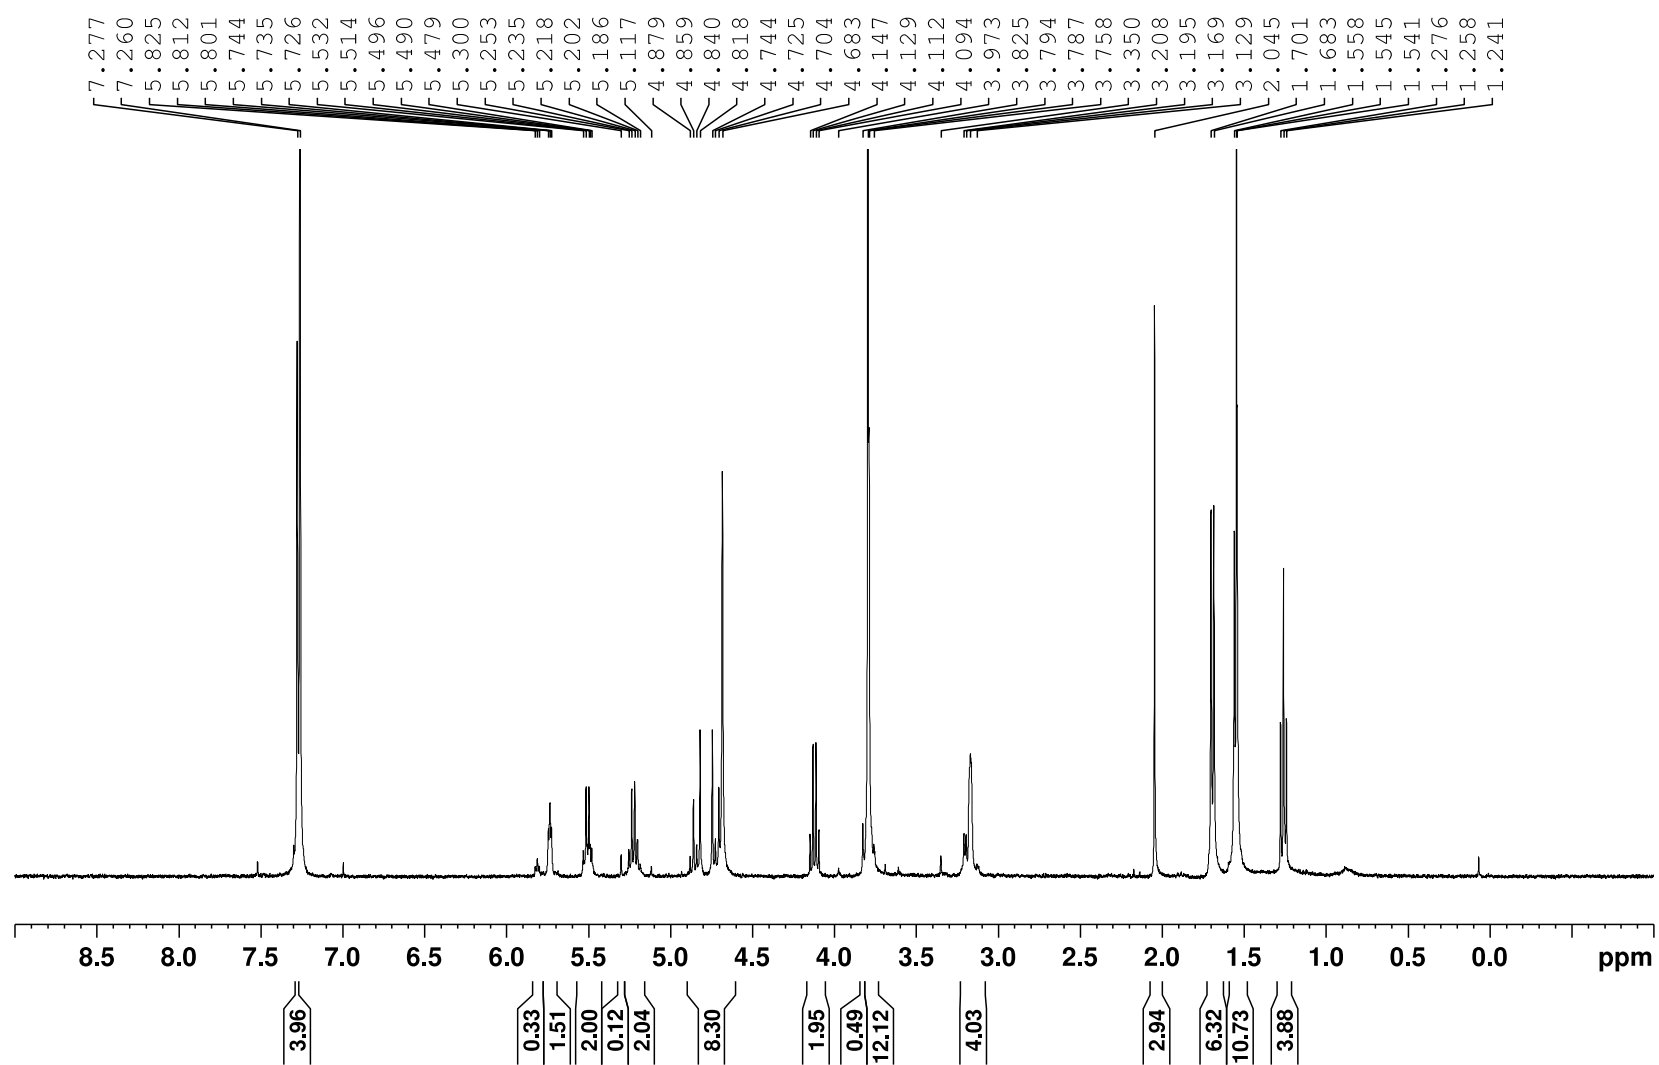

JHS-3022-500; Sy Monomer; CDCl<sub>3</sub>; 13C; 500;  
1024 Scans; 10/24/17

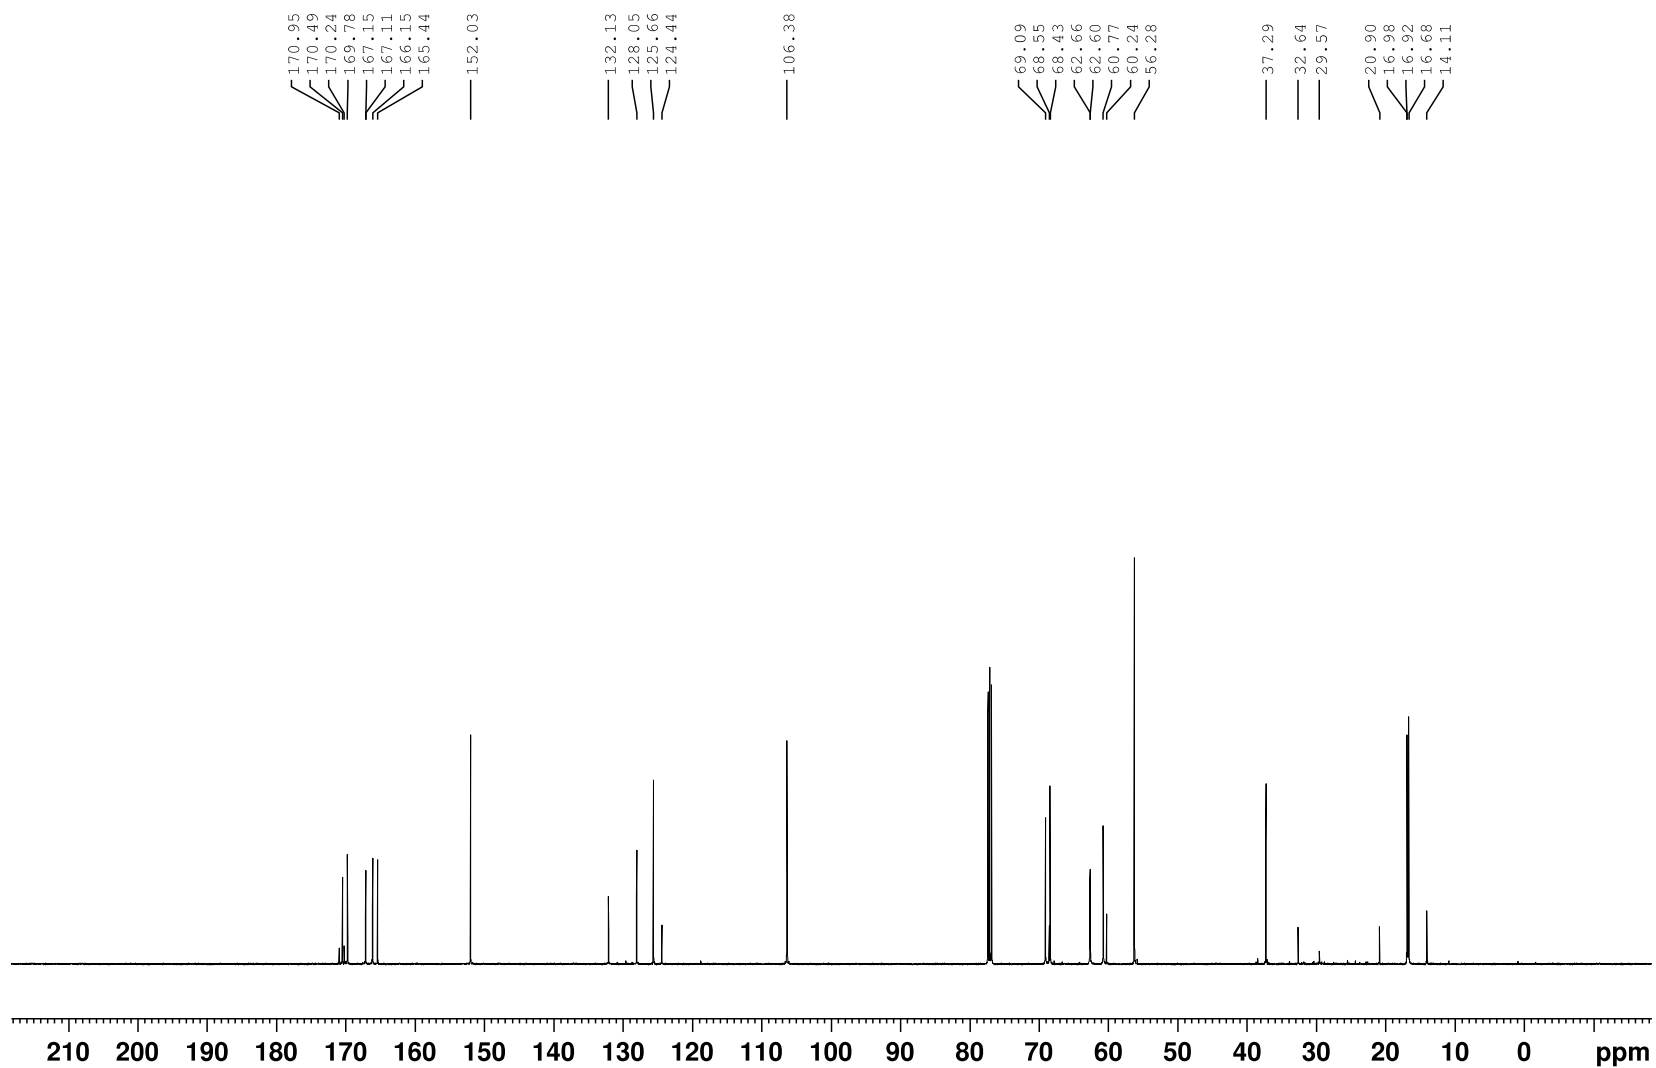

| <b>Poly(Sy)</b>                                                                    |           |      |                                           | <sup>13</sup> C-NMR (500 MHz, CDCl <sub>3</sub> ) | HRMS (ESI)                        |
|------------------------------------------------------------------------------------|-----------|------|-------------------------------------------|---------------------------------------------------|-----------------------------------|
| 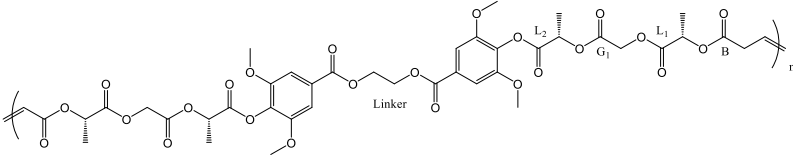 |           |      |                                           | $\delta$ (ppm) + Assignment                       | $M_n$                             |
|                                                                                    |           |      |                                           |                                                   | 25,242 Da                         |
| <sup>1</sup> H-NMR (500 MHz, CDCl <sub>3</sub> )                                   |           |      |                                           | $\bar{D}$<br>1.40                                 |                                   |
| $\delta$ (ppm)                                                                     | Mult. (J) | Int. | Assignment                                |                                                   |                                   |
| 1.57                                                                               | d (6.8)   | 6    | CH <sub>3</sub> (L)                       |                                                   |                                   |
| 1.70                                                                               | d (6.8)   | 6    | CH <sub>3</sub> (L)                       |                                                   |                                   |
| 3.18                                                                               | m         | 4    | CH <sub>2</sub> (Linker)                  |                                                   |                                   |
| 3.82                                                                               | s         | 12   | MeO- (Linker)                             |                                                   |                                   |
| 4.65                                                                               | m         | 6    | CH <sub>2</sub> (G <sub>1</sub> , Linker) |                                                   |                                   |
| 4.90                                                                               | d (16)    | 2    | CH <sub>2</sub> (G <sub>1</sub> )         |                                                   |                                   |
| 5.17                                                                               | m         | 2    | CH (L)                                    |                                                   |                                   |
| 5.51                                                                               | m         | 2    | CH (L)                                    |                                                   |                                   |
| 5.72                                                                               | m         | 1.4  | CH (B Trans)                              |                                                   |                                   |
| 5.81                                                                               | m         | 0.6  | CH (B Cis)                                |                                                   |                                   |
| 7.29                                                                               | s         | 4    | Aromatic                                  |                                                   |                                   |
|                                                                                    |           |      |                                           |                                                   | 16.91                             |
|                                                                                    |           |      |                                           | 17.18                                             | CH <sub>3</sub> (L)               |
|                                                                                    |           |      |                                           | 37.40                                             | CH <sub>2</sub> (B)               |
|                                                                                    |           |      |                                           | 56.47                                             | MeO- (Linker)                     |
|                                                                                    |           |      |                                           | 60.87                                             | CH <sub>2</sub> (G <sub>1</sub> ) |
|                                                                                    |           |      |                                           | 62.97                                             | CH <sub>2</sub> (Linker)          |
|                                                                                    |           |      |                                           | 68.59                                             | CH (L)                            |
|                                                                                    |           |      |                                           | 69.21                                             | CH (L)                            |
|                                                                                    |           |      |                                           | 106.56                                            | Aromatic                          |
|                                                                                    |           |      |                                           | 124.40                                            | CH (B Cis)                        |
|                                                                                    |           |      |                                           | 125.82                                            | CH (B Trans)                      |
|                                                                                    |           |      |                                           | 128.16                                            | Aromatic                          |
|                                                                                    |           |      |                                           | 132.25                                            | Aromatic                          |
|                                                                                    |           |      |                                           | 152.17                                            | Aromatic                          |
|                                                                                    |           |      |                                           | 165.68                                            | CO                                |
|                                                                                    |           |      |                                           | 166.43                                            | CO                                |
|                                                                                    |           |      |                                           | 167.47                                            | CO                                |
|                                                                                    |           |      |                                           | 170.16                                            | CO                                |

**Cyclic Sy Monomer** (110 mg, 0.118 mmol, 1 eq.) was weighed in a flame dried 1 mL vial under nitrogen. A stock solution of Grubbs II (1 mg, 0.0012 mmol, 1 mol%) in dry THF (5.8 mg/mL, 0.17 mL, 0.7 M) was added and the vial was shaken at RT for 4 h. The reaction mixture was quenched by the addition of excess ethyl vinyl ether and vortexing. Solution was concentrated to yield a crude solid polymer, which was reprecipitated into a stirring solution of MeOH and filtered to collect pure polymer as a brown solid (45 mg, 41% yield).



JHS-3047; Poly(Sy); CDC13; 1H; 500; 16 Scans;  
10/27/17

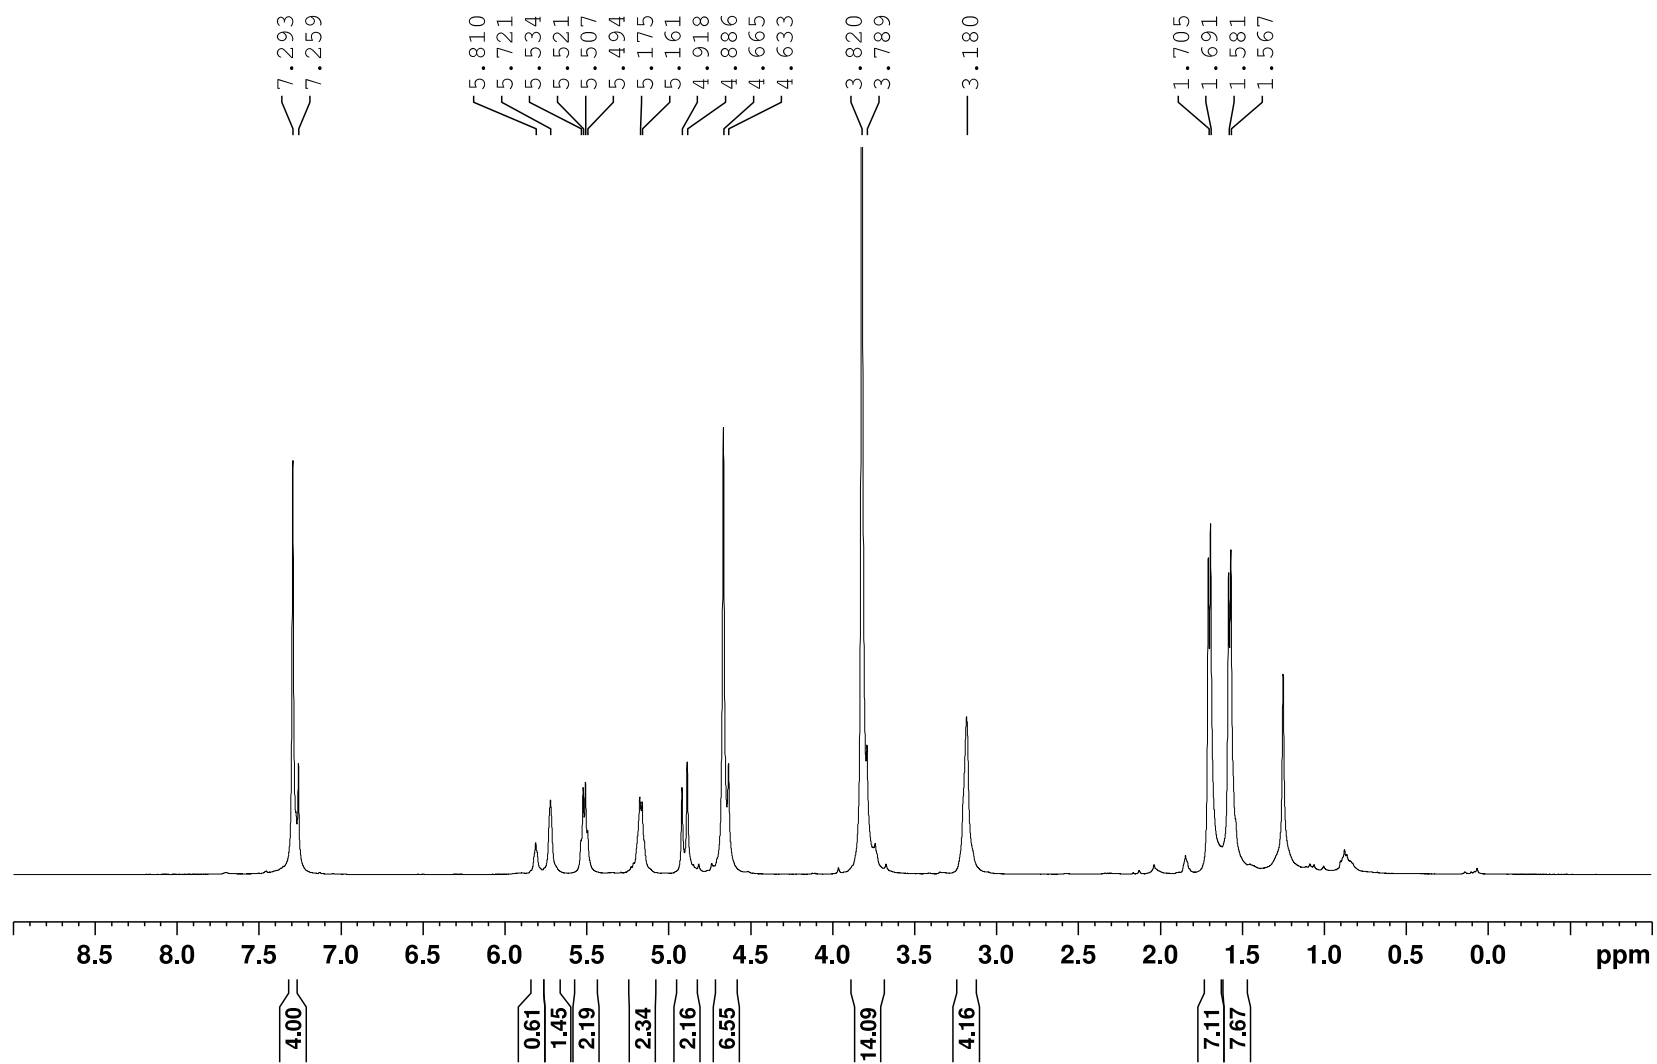

JHS-3047; Poly(Sy); CDC13; 13C; 500; 128 Scans;  
10/27/17

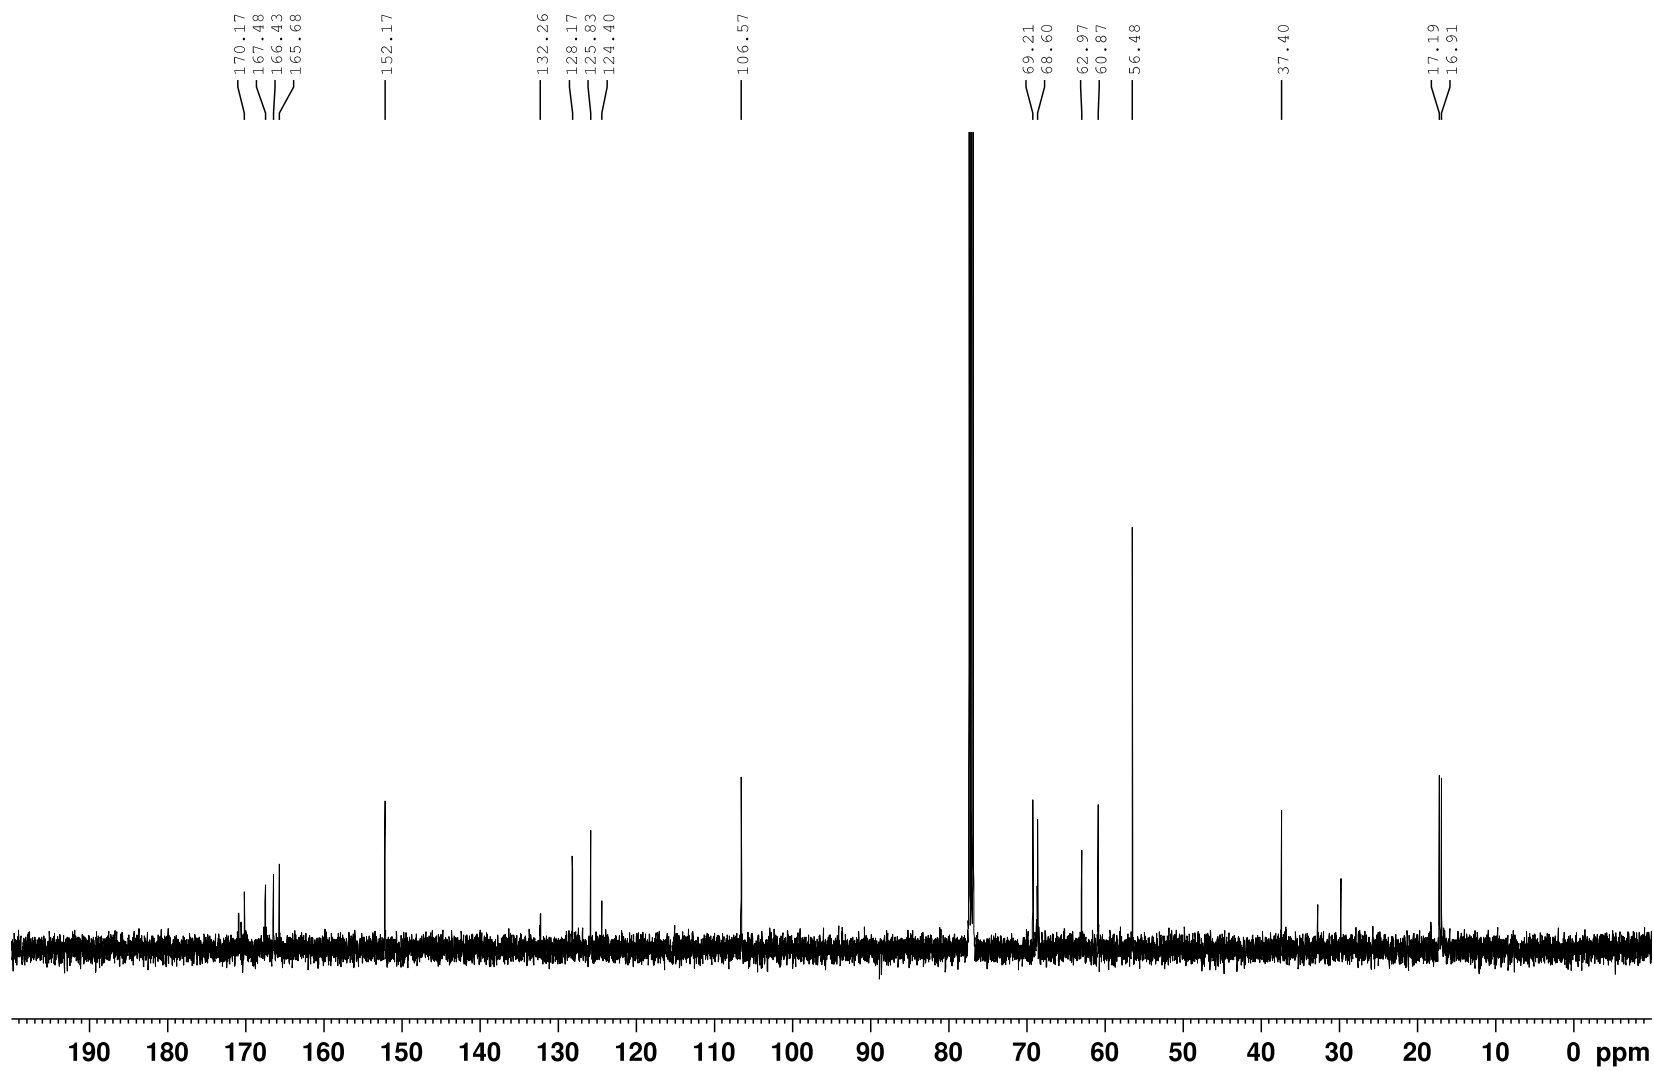

## 2.9 EEG LINKER CONTAINING COMPOUNDS AND PRECURSORS

| Bn-LGLGL-Si                                                                        |           |      |                                                                               | <sup>13</sup> C-NMR (400 MHz, CDCl <sub>3</sub> ) | HRMS (ESI)                                                               |
|------------------------------------------------------------------------------------|-----------|------|-------------------------------------------------------------------------------|---------------------------------------------------|--------------------------------------------------------------------------|
| 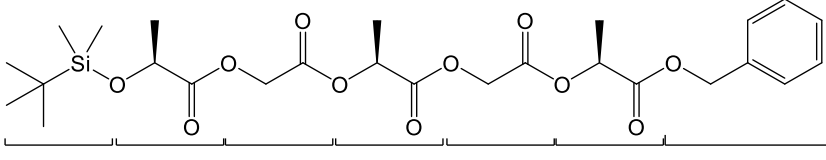 |           |      |                                                                               | $\delta$ (ppm) +<br>Assignment                    | <u>Calc. Mass</u><br>554.22 amu                                          |
|                                                                                    |           |      |                                                                               | -5.22 Si                                          | <u>Calc.</u><br>[M + H] <sup>+</sup><br>555.22 amu                       |
|                                                                                    |           |      |                                                                               | -4.84 Si                                          |                                                                          |
|                                                                                    |           |      |                                                                               | 16.91 L (CH <sub>3</sub> )                        | <u>Found</u><br>[M + H] <sup>+</sup><br>555.22634 amu                    |
|                                                                                    |           |      |                                                                               | 18.40 L (CH <sub>3</sub> )                        |                                                                          |
|                                                                                    |           |      |                                                                               | 21.47 L (CH <sub>3</sub> )                        |                                                                          |
|                                                                                    |           |      |                                                                               | 25.80 Si (t-Bu)                                   | <u>Composition</u><br>C <sub>26</sub> H <sub>38</sub> O <sub>11</sub> Si |
|                                                                                    |           |      |                                                                               | 60.56 G (CH <sub>2</sub> )                        |                                                                          |
|                                                                                    |           |      |                                                                               | 60.95 G (CH <sub>2</sub> )                        |                                                                          |
|                                                                                    |           |      |                                                                               | 67.37 Bn (CH <sub>2</sub> )                       |                                                                          |
|                                                                                    |           |      |                                                                               | 68.16 L (CH)                                      |                                                                          |
|                                                                                    |           |      |                                                                               | 69.11 L (CH)                                      |                                                                          |
|                                                                                    |           |      |                                                                               | 69.61 L (CH)                                      |                                                                          |
|                                                                                    |           |      |                                                                               | 128.29 Bn (CH)                                    |                                                                          |
|                                                                                    |           |      |                                                                               | 128.62 Bn (CH)                                    |                                                                          |
|                                                                                    |           |      |                                                                               | 128.75 Bn (CH)                                    |                                                                          |
|                                                                                    |           |      |                                                                               | 135.20 Bn (CH)                                    |                                                                          |
|                                                                                    |           |      |                                                                               | 166.63 CO                                         |                                                                          |
|                                                                                    |           |      |                                                                               | 167.01 CO                                         |                                                                          |
|                                                                                    |           |      |                                                                               | 169.59 CO                                         |                                                                          |
|                                                                                    |           |      |                                                                               | 169.93 CO                                         |                                                                          |
|                                                                                    |           |      |                                                                               | 173.54 CO                                         |                                                                          |
| <sup>1</sup> H-NMR (400 MHz, CDCl <sub>3</sub> )                                   |           |      |                                                                               |                                                   |                                                                          |
| d $\delta$ (ppm)                                                                   | Mult. (J) | Int. | Assignment                                                                    |                                                   |                                                                          |
| 0.08                                                                               | s         | 3    | Si (Me)                                                                       |                                                   |                                                                          |
| 0.10                                                                               | s         | 3    | Si (Me)                                                                       |                                                   |                                                                          |
| 0.90                                                                               | s         | 9    | Si (t-Bu)                                                                     |                                                   |                                                                          |
| 1.46                                                                               | d (6.8)   | 3    | L <sub>1</sub> (CH <sub>3</sub> )                                             |                                                   |                                                                          |
| 1.52                                                                               | d (7.2)   | 3    | L <sub>2</sub> (CH <sub>3</sub> )                                             |                                                   |                                                                          |
| 1.58                                                                               | d (7.2)   | 3    | L <sub>3</sub> (CH <sub>3</sub> )                                             |                                                   |                                                                          |
| 4.44                                                                               | q (6.8)   | 1    | L <sub>1</sub> (CH)                                                           |                                                   |                                                                          |
| 4.75                                                                               | m         | 4    | G <sub>1</sub> (CH <sub>3</sub> ), G <sub>2</sub> (CH <sub>2</sub> )          |                                                   |                                                                          |
| 5.21                                                                               | m         | 4    | L <sub>2</sub> (CH <sub>3</sub> ), L <sub>3</sub> (CH), Bn (CH <sub>2</sub> ) |                                                   |                                                                          |
| 7.34                                                                               | m         | 5    | Bn (Aromatic)                                                                 |                                                   |                                                                          |

**Bn-LG** (0.86 g, 3.61 mmol) and **LGL-Si** (1.15 g, 3.44 mmol) were dissolved in dry DCM and added to a flame dried 100 mL Schlenk under nitrogen. DPTS (0.21 g, 0.7 mmol) and DCC (0.80 g, 3.8 mmol) were added to the reaction mixture sequentially through a funnel. The reaction mixture was allowed to stir overnight under nitrogen. Upon consumption of starting material by TLC, the reaction mixture was diluted with hexanes and filtered to remove DCU. The filtrate was then concentrated *in vacuo* to yield a colorless oil (1.776 g, 93% yield).

JHS-3007; Bn-LGLGL-Si; CDCl<sub>3</sub>; 1H; 400a; 16  
Scans; 9/9/16

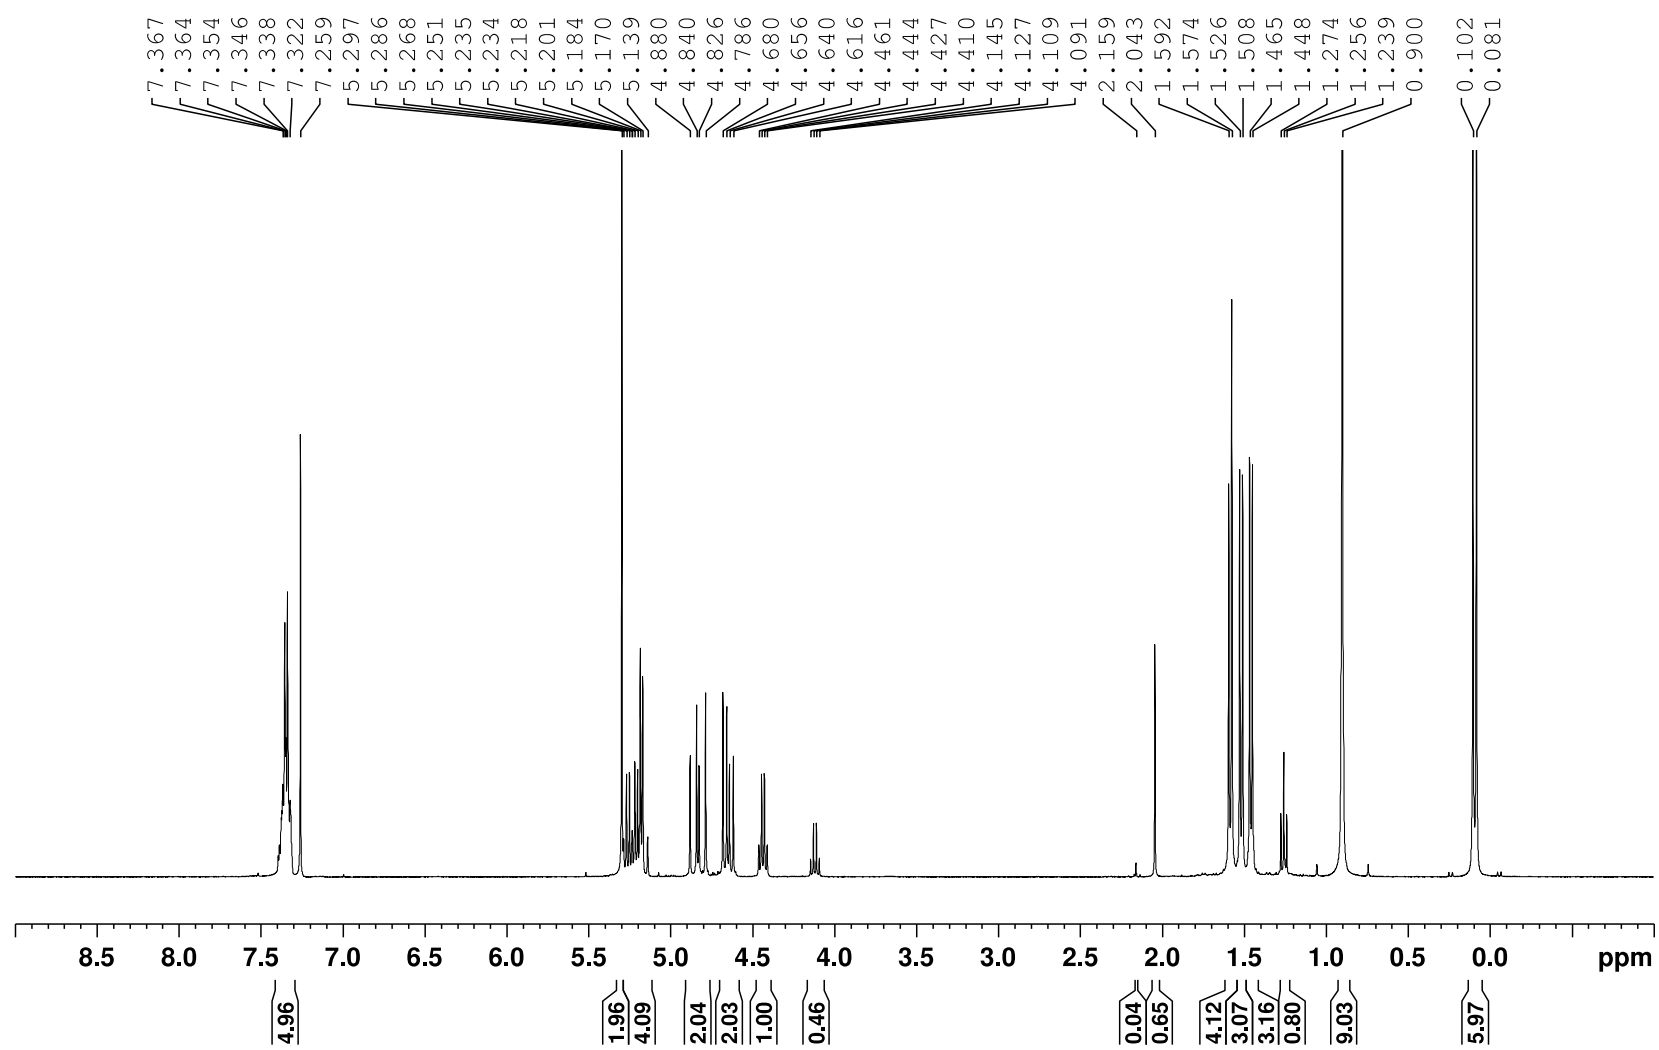

JHS-3007; Bn-LGLGL-Si; CDCl<sub>3</sub>; 13C; 400a; 2048  
Scans; 9/9/16

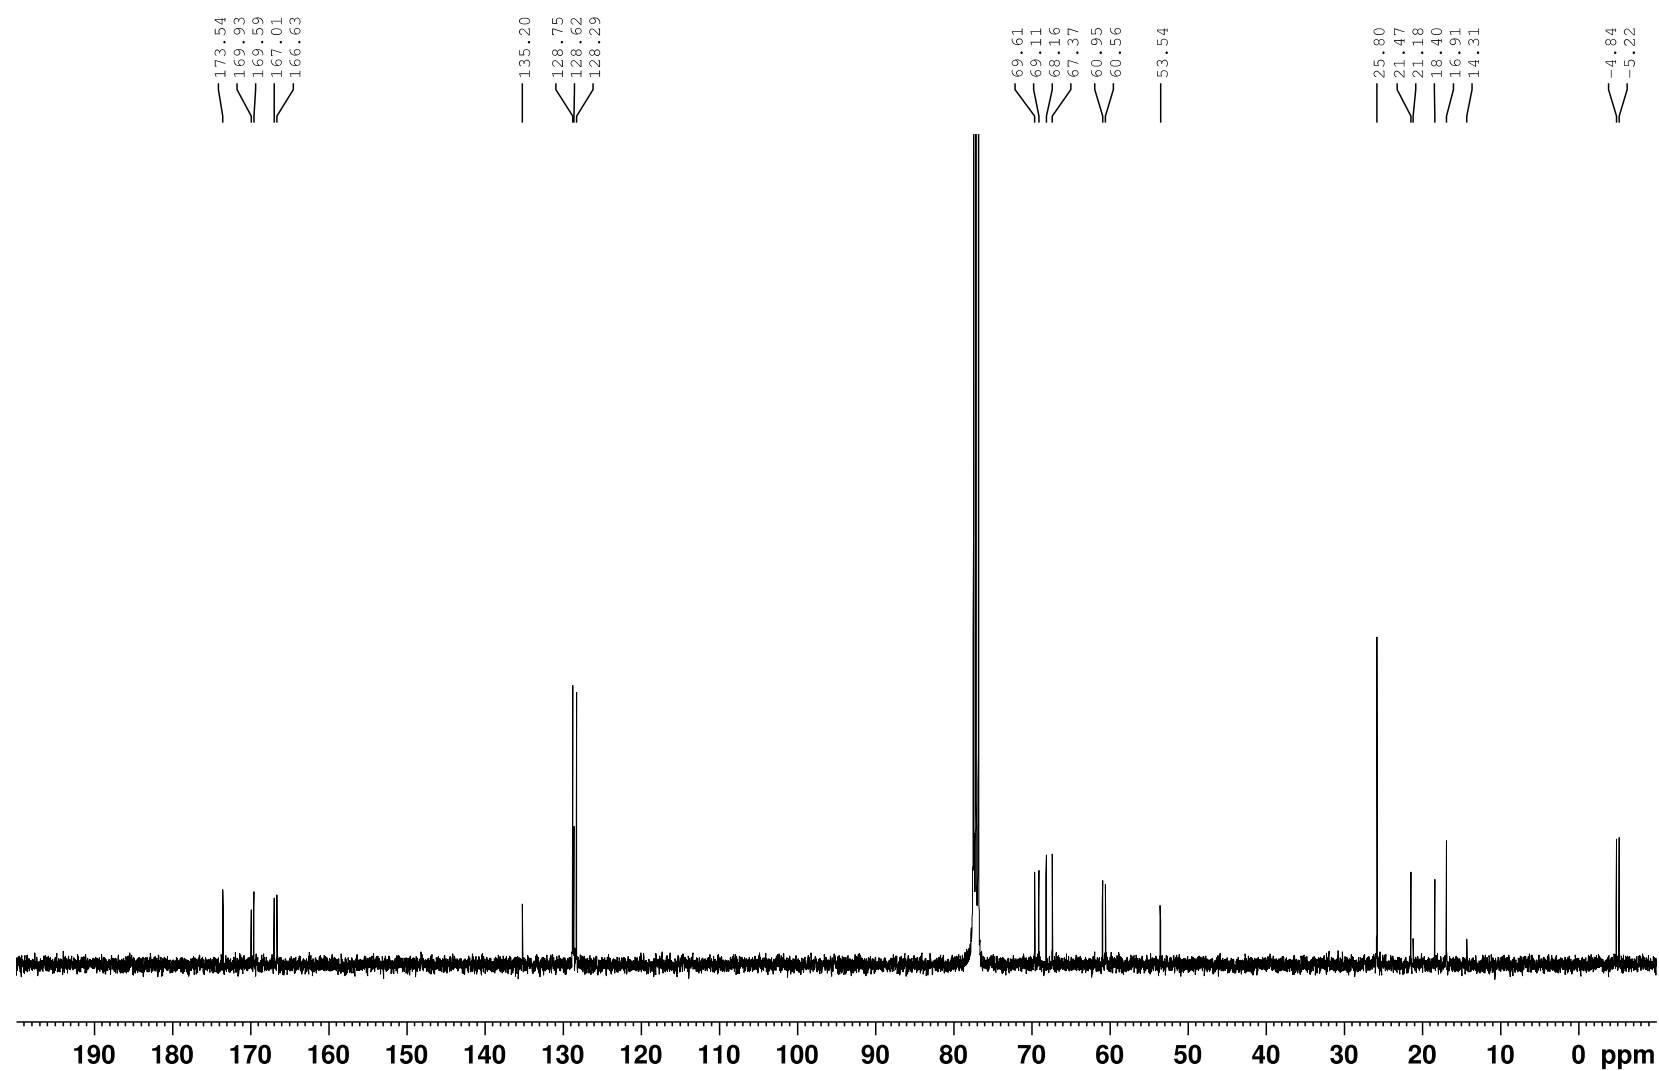

| <b>LGLGL-Si</b>                                                                    |           |      |                                   | <sup>13</sup> C-NMR (400 MHz, CDCl <sub>3</sub> )                                                                                                                                                                                                                                     | HRMS (ESI)                                                                                                                                                                                       |
|------------------------------------------------------------------------------------|-----------|------|-----------------------------------|---------------------------------------------------------------------------------------------------------------------------------------------------------------------------------------------------------------------------------------------------------------------------------------|--------------------------------------------------------------------------------------------------------------------------------------------------------------------------------------------------|
| 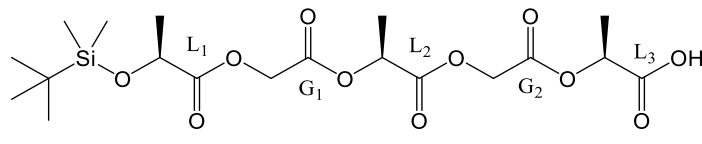 |           |      |                                   | $\delta$ (ppm) +<br>Assignment                                                                                                                                                                                                                                                        | <u>Calc. Mass</u><br>464.17 amu                                                                                                                                                                  |
|                                                                                    |           |      |                                   | -5.21 Si<br>-4.84 Si<br>16.81 L (CH <sub>3</sub> )<br>16.91 L (CH <sub>3</sub> )<br>18.41 L (CH <sub>3</sub> )<br>21.47 SI<br>25.81 Si<br>60.94 G (CH <sub>2</sub> )<br>68.19 L (CH)<br>69.11 L (CH)<br>69.14 L (CH)<br>166.63 CO<br>167.05 CO<br>169.66 CO<br>173.59 CO<br>174.46 CO | <u>Found</u><br>[M + H] <sup>+</sup><br>465.17 amu<br><br>[M + H] <sup>+</sup><br>349.07634<br>amu (minus<br>Si)<br><br><u>Composition</u><br>C <sub>19</sub> H <sub>32</sub> O <sub>11</sub> Si |
| <sup>1</sup> H-NMR (400 MHz, CDCl <sub>3</sub> )                                   |           |      |                                   |                                                                                                                                                                                                                                                                                       |                                                                                                                                                                                                  |
| d $\delta$ (ppm)                                                                   | Mult. (J) | Int. | Assignment                        |                                                                                                                                                                                                                                                                                       |                                                                                                                                                                                                  |
| 0.08                                                                               | s         | 3    | Si (Me)                           |                                                                                                                                                                                                                                                                                       |                                                                                                                                                                                                  |
| 0.10                                                                               | s         | 3    | Si (Me)                           |                                                                                                                                                                                                                                                                                       |                                                                                                                                                                                                  |
| 0.90                                                                               | s         | 9    | Si (t-Bu)                         |                                                                                                                                                                                                                                                                                       |                                                                                                                                                                                                  |
| 1.46                                                                               | d (6.8)   | 3    | L <sub>1</sub> (CH <sub>3</sub> ) |                                                                                                                                                                                                                                                                                       |                                                                                                                                                                                                  |
| 1.56                                                                               | d (7.2)   | 3    | L <sub>2</sub> (CH <sub>3</sub> ) |                                                                                                                                                                                                                                                                                       |                                                                                                                                                                                                  |
| 1.59                                                                               | d (7.2)   | 3    | L <sub>3</sub> (CH <sub>3</sub> ) |                                                                                                                                                                                                                                                                                       |                                                                                                                                                                                                  |
| 4.44                                                                               | q (6.8)   | 1    | L <sub>1</sub> (CH)               |                                                                                                                                                                                                                                                                                       |                                                                                                                                                                                                  |
| 4.65                                                                               | d (16)    | 1    | G <sub>1</sub> (CH <sub>2</sub> ) |                                                                                                                                                                                                                                                                                       |                                                                                                                                                                                                  |
| 4.66                                                                               | d (16)    | 1    | G <sub>2</sub> (CH <sub>2</sub> ) |                                                                                                                                                                                                                                                                                       |                                                                                                                                                                                                  |
| 4.81                                                                               | d (16)    | 1    | G <sub>1</sub> (CH <sub>2</sub> ) |                                                                                                                                                                                                                                                                                       |                                                                                                                                                                                                  |
| 4.87                                                                               | d (16)    | 1    | G <sub>2</sub> (CH <sub>2</sub> ) |                                                                                                                                                                                                                                                                                       |                                                                                                                                                                                                  |
| 5.20                                                                               | q (7.2)   | 1    | L <sub>2</sub> (CH <sub>3</sub> ) |                                                                                                                                                                                                                                                                                       |                                                                                                                                                                                                  |
| 5.26                                                                               | q (7.2)   | 1    | L <sub>3</sub> (CH <sub>3</sub> ) |                                                                                                                                                                                                                                                                                       |                                                                                                                                                                                                  |

**Bn-LGLGL-Si** (1.7 g, 3.1 mmol) and Pd/C (0.17 g, 10 wt%) were dissolved in EtOAc (30 mL, 0.1 M) in a flame dried Schlenk flask and allowed to stir overnight at RT under 1 atm H<sub>2</sub>. Upon consumption of starting material by TLC, the reaction mixture was filtered over celite and concentrated *in vacuo* to yield a colorless oil (1.43 g, 99% yield).

JHS-3008; LGLGL-Si; CDCl<sub>3</sub>; 1H; 400a; 16 Scans;  
9/12/16

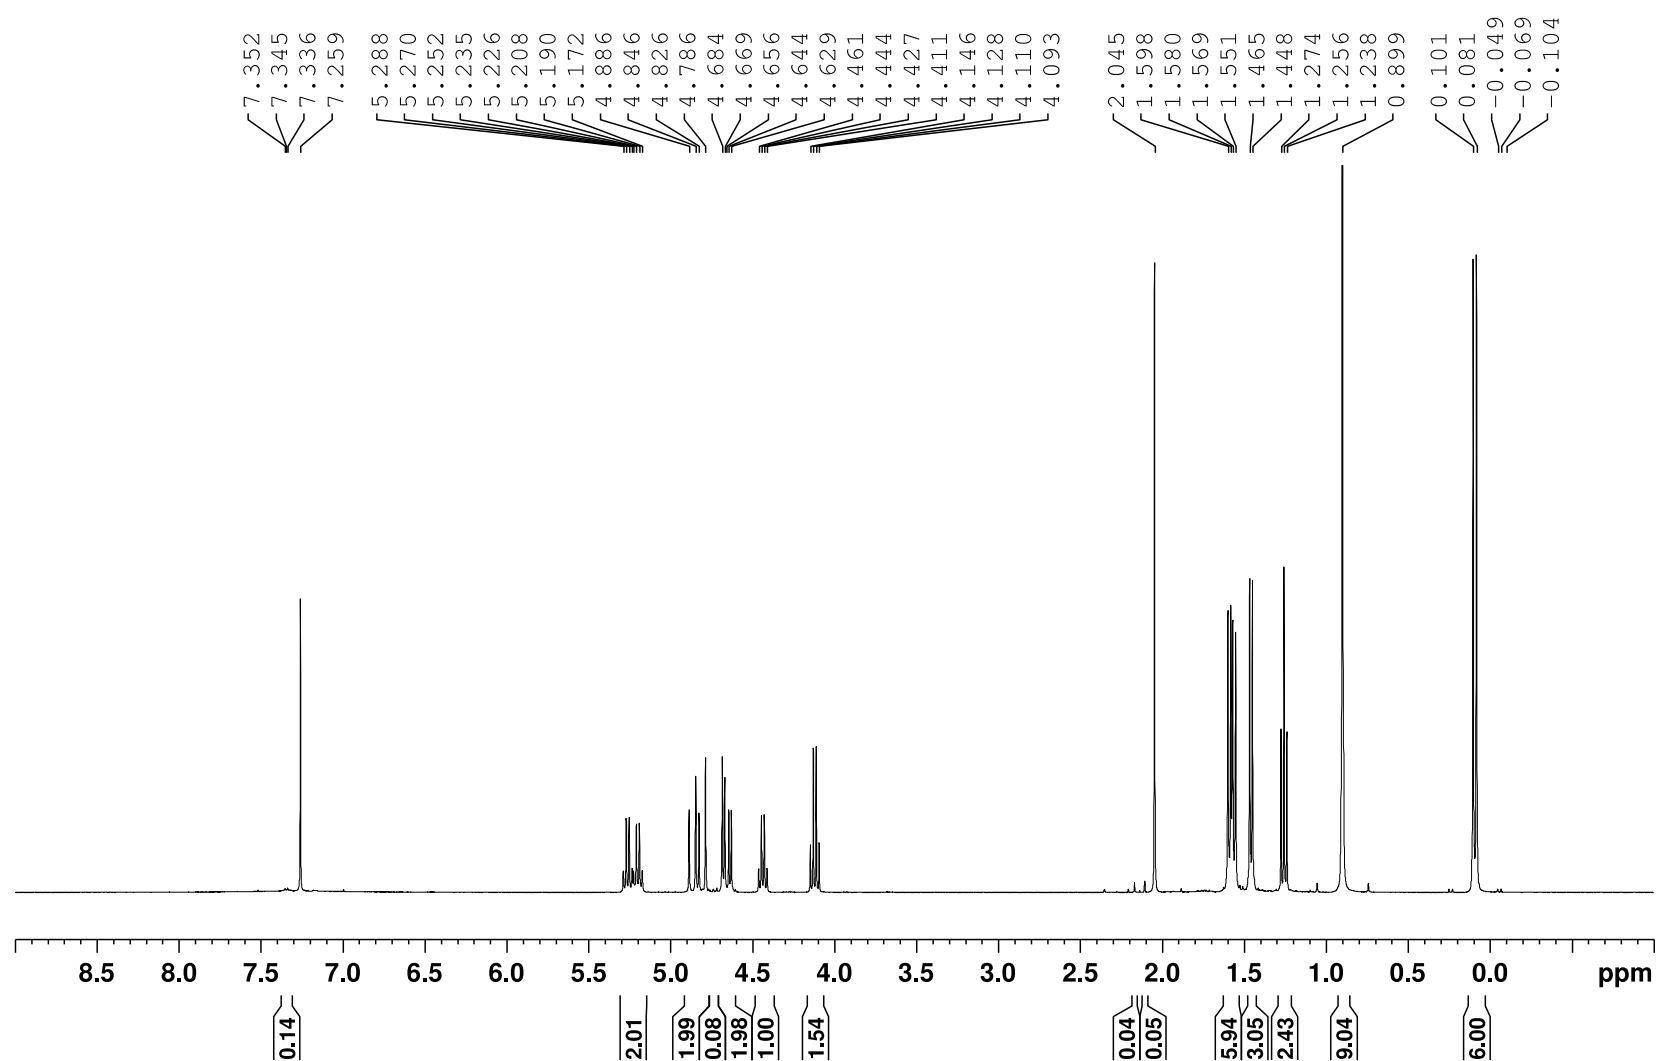

JHS-3008; LGLGL-Si; CDCl<sub>3</sub>; 13C; 400a;  
2048 Scans; 9/12/16

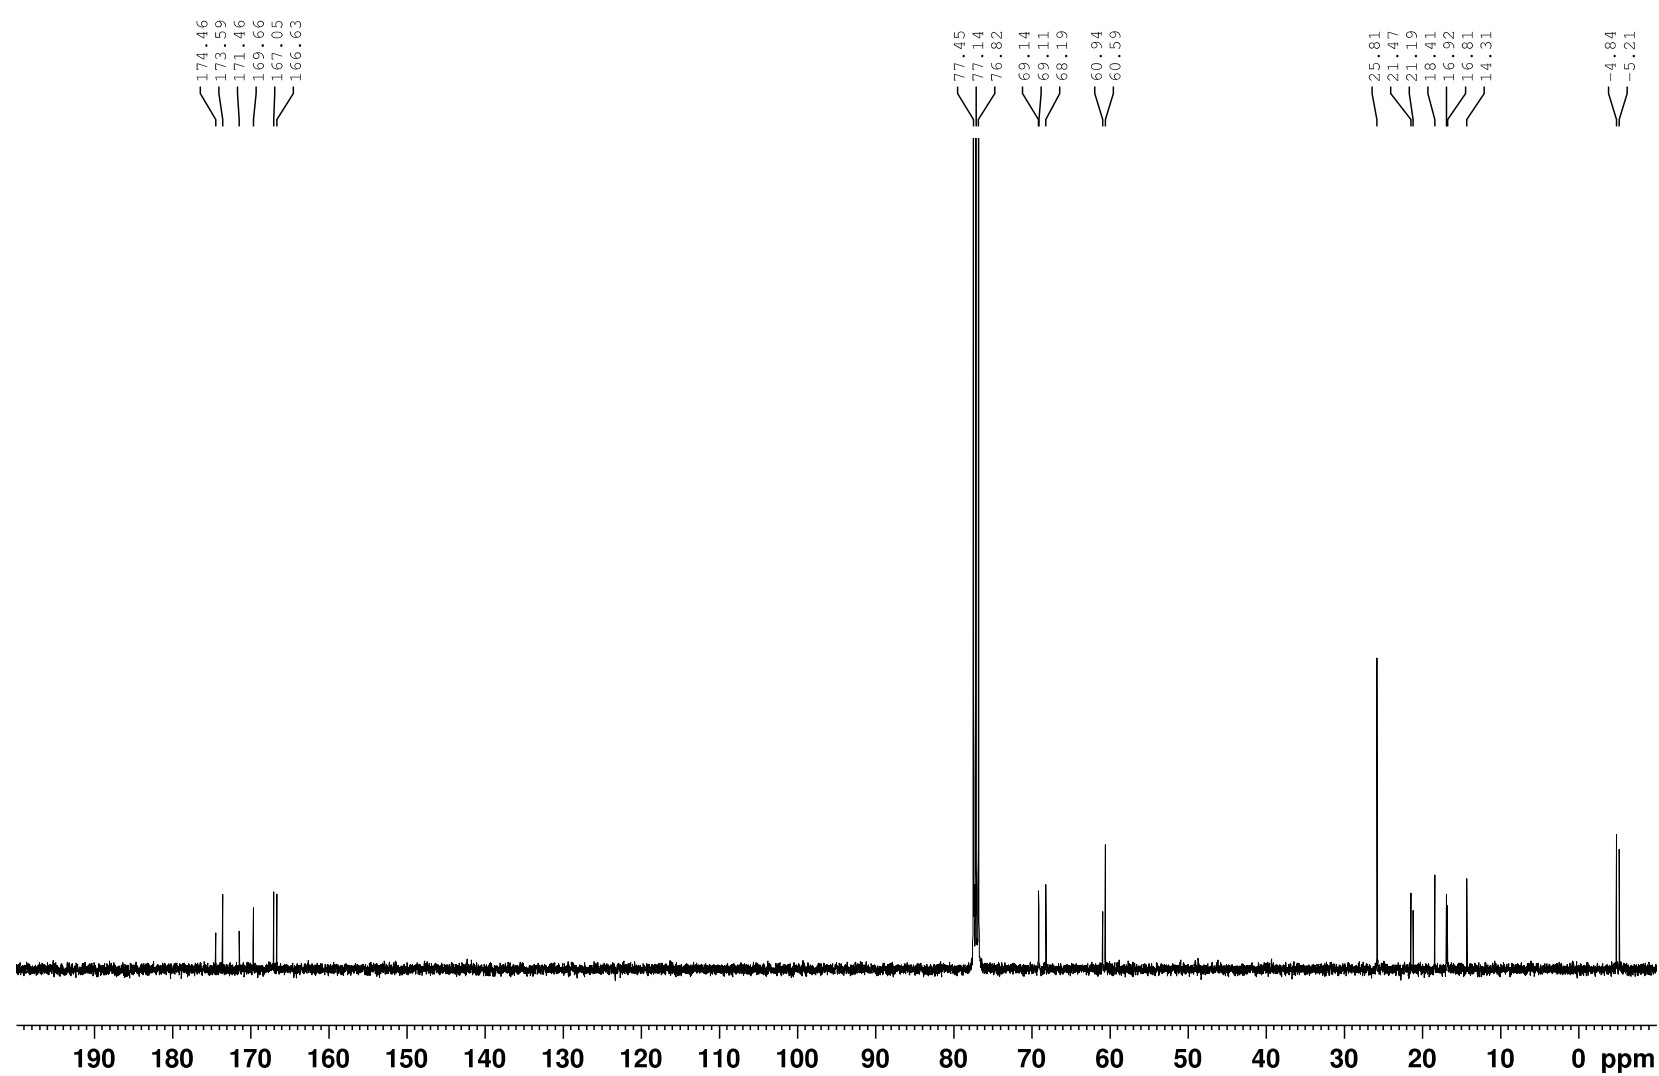

| <b>Si-LGLGL-EG-LGLGL-Si</b>                                                        |           |      |                                   | <sup>13</sup> C-NMR (400 MHz, CDCl <sub>3</sub> )                                                                                                                                                                                                                                                                                                                              |  | HRMS (ESI)                                                                                                                                                                                                                     |
|------------------------------------------------------------------------------------|-----------|------|-----------------------------------|--------------------------------------------------------------------------------------------------------------------------------------------------------------------------------------------------------------------------------------------------------------------------------------------------------------------------------------------------------------------------------|--|--------------------------------------------------------------------------------------------------------------------------------------------------------------------------------------------------------------------------------|
| 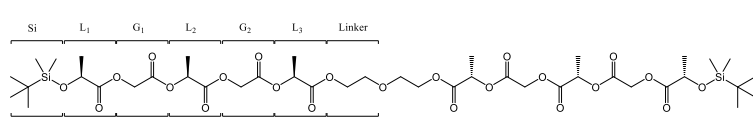 |           |      |                                   | $\delta$ (ppm) + Assignment                                                                                                                                                                                                                                                                                                                                                    |  | <u>Calc. Mass</u>                                                                                                                                                                                                              |
|                                                                                    |           |      |                                   | -5.18 Si<br>-4.81 Si<br>16.95 L (CH <sub>3</sub> )<br>18.43 L (CH <sub>3</sub> )<br>21.50 L (CH <sub>3</sub> )<br>25.84 Si<br>60.59 G (CH <sub>2</sub> )<br>60.97 G (CH <sub>2</sub> )<br>64.50 Linker (CH <sub>2</sub> )<br>68.19 Linker (CH <sub>2</sub> )<br>68.88 L (CH)<br>69.13 L (CH)<br>69.159 L (CH)<br>166.66 CO<br>167.03 CO<br>169.63 CO<br>170.06 CO<br>173.56 CO |  | 998.38 amu<br><br><u>Calc.</u><br>[M + H] <sup>+</sup><br>999.39 amu<br><br><u>Found</u><br>[M + H] <sup>+</sup><br>999.38999 amu<br><br><u>Composition</u><br>C <sub>42</sub> H <sub>70</sub> O <sub>23</sub> Si <sub>2</sub> |
| <sup>1</sup> H-NMR (400 MHz, CDCl <sub>3</sub> )                                   |           |      |                                   |                                                                                                                                                                                                                                                                                                                                                                                |  |                                                                                                                                                                                                                                |
| $\delta$ (ppm)                                                                     | Mult. (J) | Int. | Assignment                        |                                                                                                                                                                                                                                                                                                                                                                                |  |                                                                                                                                                                                                                                |
| 0.08                                                                               | s         | 3    | Si (Me)                           |                                                                                                                                                                                                                                                                                                                                                                                |  |                                                                                                                                                                                                                                |
| 0.10                                                                               | s         | 3    | Si (Me)                           |                                                                                                                                                                                                                                                                                                                                                                                |  |                                                                                                                                                                                                                                |
| 0.90                                                                               | s         | 9    | Si (t-Bu)                         |                                                                                                                                                                                                                                                                                                                                                                                |  |                                                                                                                                                                                                                                |
| 1.45                                                                               | d (6.8)   | 3    | L <sub>1</sub> (CH <sub>3</sub> ) |                                                                                                                                                                                                                                                                                                                                                                                |  |                                                                                                                                                                                                                                |
| 1.52                                                                               | d (7.2)   | 3    | L <sub>2</sub> (CH <sub>3</sub> ) |                                                                                                                                                                                                                                                                                                                                                                                |  |                                                                                                                                                                                                                                |
| 1.58                                                                               | d (7.2)   | 3    | L <sub>3</sub> (CH <sub>3</sub> ) |                                                                                                                                                                                                                                                                                                                                                                                |  |                                                                                                                                                                                                                                |
| 3.68                                                                               | t (4.9)   | 4    | Linker (CH <sub>2</sub> )         |                                                                                                                                                                                                                                                                                                                                                                                |  |                                                                                                                                                                                                                                |
| 4.29                                                                               | m         | 4    | Linker (CH <sub>2</sub> )         |                                                                                                                                                                                                                                                                                                                                                                                |  |                                                                                                                                                                                                                                |
| 4.44                                                                               | q (6.8)   | 1    | L <sub>1</sub> (CH)               |                                                                                                                                                                                                                                                                                                                                                                                |  |                                                                                                                                                                                                                                |
| 4.65                                                                               | d (16)    | 1    | G <sub>1</sub> (CH <sub>2</sub> ) |                                                                                                                                                                                                                                                                                                                                                                                |  |                                                                                                                                                                                                                                |
| 4.66                                                                               | d (16)    | 1    | G <sub>2</sub> (CH <sub>2</sub> ) |                                                                                                                                                                                                                                                                                                                                                                                |  |                                                                                                                                                                                                                                |
| 4.80                                                                               | d (16)    | 1    | G <sub>1</sub> (CH <sub>2</sub> ) |                                                                                                                                                                                                                                                                                                                                                                                |  |                                                                                                                                                                                                                                |
| 4.86                                                                               | d (16)    | 1    | G <sub>2</sub> (CH <sub>2</sub> ) |                                                                                                                                                                                                                                                                                                                                                                                |  |                                                                                                                                                                                                                                |
| 5.17                                                                               | q (7.2)   | 1    | L <sub>2</sub> (CH <sub>3</sub> ) |                                                                                                                                                                                                                                                                                                                                                                                |  |                                                                                                                                                                                                                                |
| 5.26                                                                               | q (7.2)   | 1    | L <sub>3</sub> (CH <sub>3</sub> ) |                                                                                                                                                                                                                                                                                                                                                                                |  |                                                                                                                                                                                                                                |

Diethylene glycol was dried over sieves for two h. **LGLGL-Si** (1.43 g, 3.07 mmol, 2.2 eq) was dissolved in dry DCM (8 mL, 0.4 M) in flame-dried vial under nitrogen. Dry diethylene glycol (0.149 g, 1.40 mmol, 1 eq), DPTS (0.185 g, 0.63 mmol, 0.45 eq) and DCC (0.664 g, 3.2 mmol, 2.3 eq) were then added sequentially and allowed to stir at RT overnight. Upon consumption of starting material by TLC, the reaction mixture was diluted with hexanes and filtered to remove DCU, concentrated and crude oil was purified via column chromatography (silica, EtOAc/hexanes) to yield a colorless oil (1.022 g, 73% yield).

JHS-3009-Fr17-24; Si-LGLGL-EG-LGLGL-Si;  
 CDCl<sub>3</sub>; 1H; 400a; 16 Scans; 9/14/16

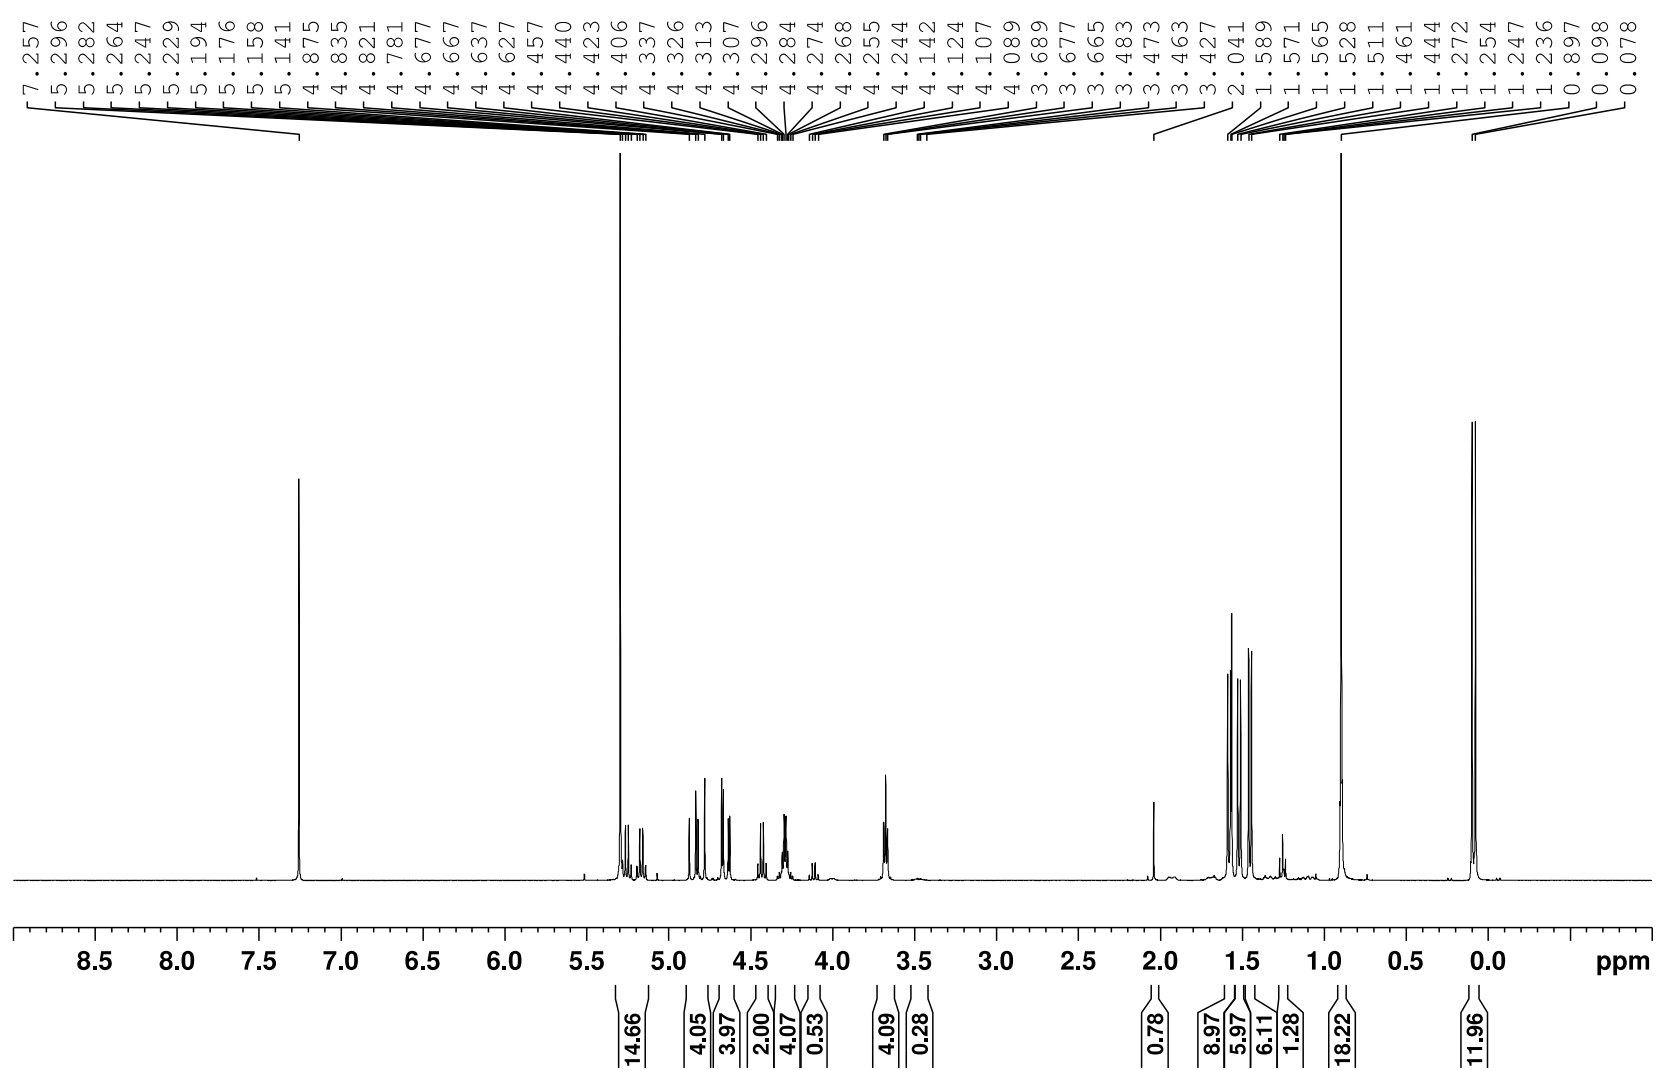

JHS-3009-Fr17-24; Si-LGLGL-EG-LGLGL-Si;  
 CDCl<sub>3</sub>; 13C; 400a; 2048 Scans; 9/14/16

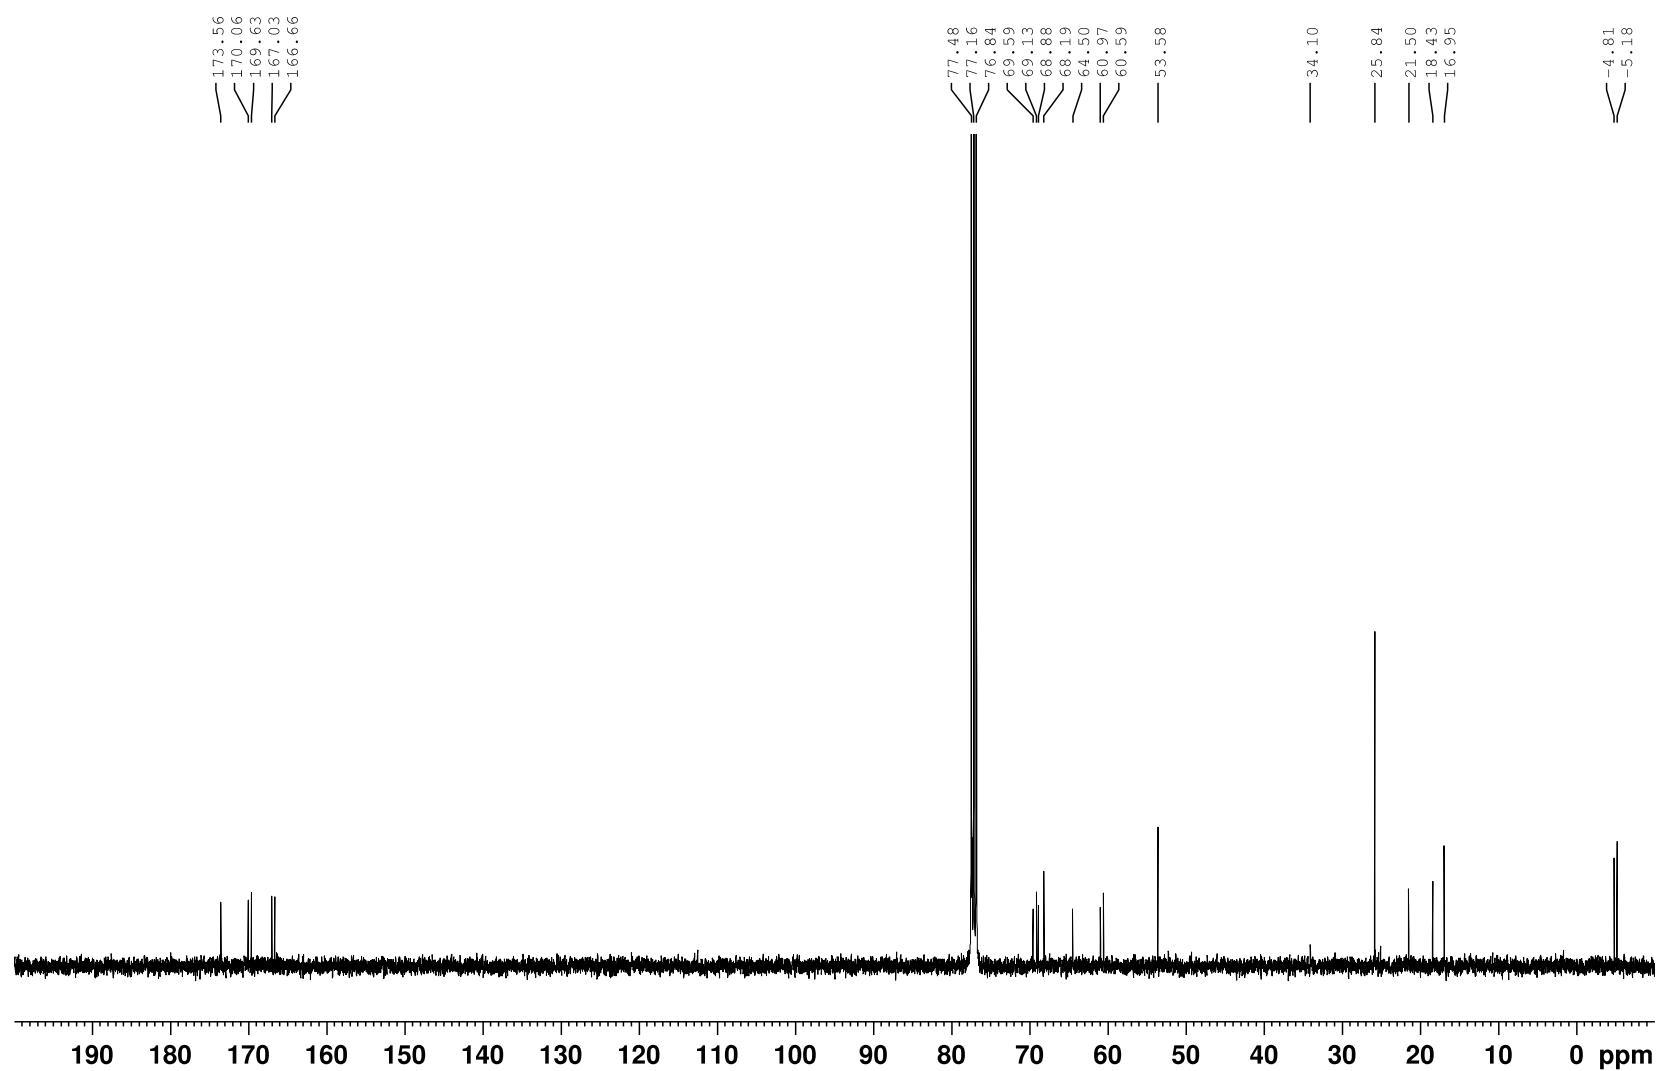

## LGLGL-EG-LGLGL

|                                                                                    |               |      |                                                                      | <sup>13</sup> C-NMR (400 MHz, CDCl <sub>3</sub> )        | HRMS (ESI)                                      |
|------------------------------------------------------------------------------------|---------------|------|----------------------------------------------------------------------|----------------------------------------------------------|-------------------------------------------------|
| 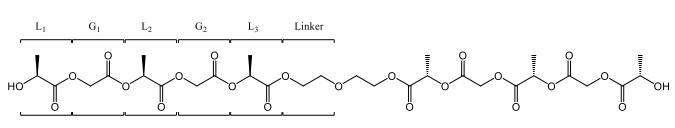 |               |      |                                                                      | $\delta$ (ppm) + Assignment                              | <u>Calc. Mass</u>                               |
|                                                                                    |               |      |                                                                      | 16.92 L (CH <sub>3</sub> )                               | 770.21 amu                                      |
|                                                                                    |               |      |                                                                      | 16.94 L (CH <sub>3</sub> )                               |                                                 |
|                                                                                    |               |      |                                                                      | 20.48 L (CH <sub>3</sub> )                               | <u>Calc.</u>                                    |
|                                                                                    |               |      |                                                                      | 61.01 G <sub>1</sub> , G <sub>2</sub> (CH <sub>2</sub> ) | [M + H] <sup>+</sup>                            |
|                                                                                    |               |      |                                                                      | 64.54 Linker (CH <sub>2</sub> )                          | 771.21 amu                                      |
|                                                                                    |               |      |                                                                      | 66.86 Linker (CH <sub>2</sub> )                          |                                                 |
|                                                                                    |               |      |                                                                      | 68.87 L (CH)                                             | <u>Found</u>                                    |
|                                                                                    |               |      |                                                                      | 69.32 L (CH)                                             | [M + H] <sup>+</sup>                            |
|                                                                                    |               |      |                                                                      | 69.63 L (CH)                                             | 771.21900                                       |
|                                                                                    |               |      |                                                                      | 166.64 CO                                                | amu                                             |
|                                                                                    |               |      |                                                                      | 166.78 CO                                                |                                                 |
|                                                                                    |               |      |                                                                      | 169.54 CO                                                | <u>Composition</u>                              |
|                                                                                    |               |      |                                                                      | 170.08 CO                                                | C <sub>30</sub> H <sub>42</sub> O <sub>23</sub> |
|                                                                                    |               |      |                                                                      | 175.08 CO                                                |                                                 |
| <sup>1</sup> H-NMR (400 MHz, CDCl <sub>3</sub> )                                   |               |      |                                                                      |                                                          |                                                 |
| d $\delta$ (ppm)                                                                   | Mult. (J)     | Int. | Assignment                                                           |                                                          |                                                 |
| 1.49                                                                               | d (6.8)       | 3    | L <sub>1</sub> (CH <sub>3</sub> )                                    |                                                          |                                                 |
| 1.53                                                                               | d (7.2)       | 3    | L <sub>2</sub> (CH <sub>3</sub> )                                    |                                                          |                                                 |
| 1.60                                                                               | d (7.2)       | 3    | L <sub>3</sub> (CH <sub>3</sub> )                                    |                                                          |                                                 |
| 2.78                                                                               | d (5.4)       | 2    | L <sub>1</sub> (OH)                                                  |                                                          |                                                 |
| 3.68                                                                               | t (4.9)       | 4    | Linker (CH <sub>2</sub> )                                            |                                                          |                                                 |
| 4.29                                                                               | m             | 4    | Linker (CH <sub>2</sub> )                                            |                                                          |                                                 |
| 4.41                                                                               | qd (6.8, 5.4) | 1    | L <sub>1</sub> (CH)                                                  |                                                          |                                                 |
| 4.67                                                                               | d (16)        | 1    | G <sub>1</sub> (CH <sub>2</sub> )                                    |                                                          |                                                 |
| 4.73                                                                               | d (16)        | 1    | G <sub>2</sub> (CH <sub>2</sub> )                                    |                                                          |                                                 |
| 4.86                                                                               | m             | 1    | G <sub>1</sub> (CH <sub>2</sub> ), G <sub>2</sub> (CH <sub>2</sub> ) |                                                          |                                                 |
| 5.17                                                                               | q (7.2)       | 1    | L <sub>2</sub> (CH <sub>3</sub> )                                    |                                                          |                                                 |
| 5.27                                                                               | q (7.2)       | 1    | L <sub>3</sub> (CH <sub>3</sub> )                                    |                                                          |                                                 |

AcOH (0.93 mL, 16.3 mmol, 16 eq) and TBAF (1 M in THF) (3.06 mL, 3.06 mmol, 3 eq) were dried over activated sieves for 2 h. **Si-LGLGL-EG-LGLGL-Si** (1.02 g, 1.02 mmol, 1 eq) was dissolved in dry THF (25 mL, 0.04 M) in a flame dried Schlenk flask under nitrogen. AcOH and TBAF were added dropwise at 0°C, allowed to warm to RT and stir for 24 h. An additional equivalent of TBAF was added and allowed to stir for 2 more h. The reaction mixture was then diluted with brine and extracted with EtOAc 3x, the combined organic layers were washed with brine 3x, dried over MgSO<sub>4</sub> and concentrated. The crude oil was then purified via column chromatography (silica, EtOAc/hexanes) to yield a white solid (493 mg, 63% yield).



JHS-3010; LGLGL-EG-LGLGL; CDCl<sub>3</sub>; 1H; 400a;  
16 Scans; 9/16/16

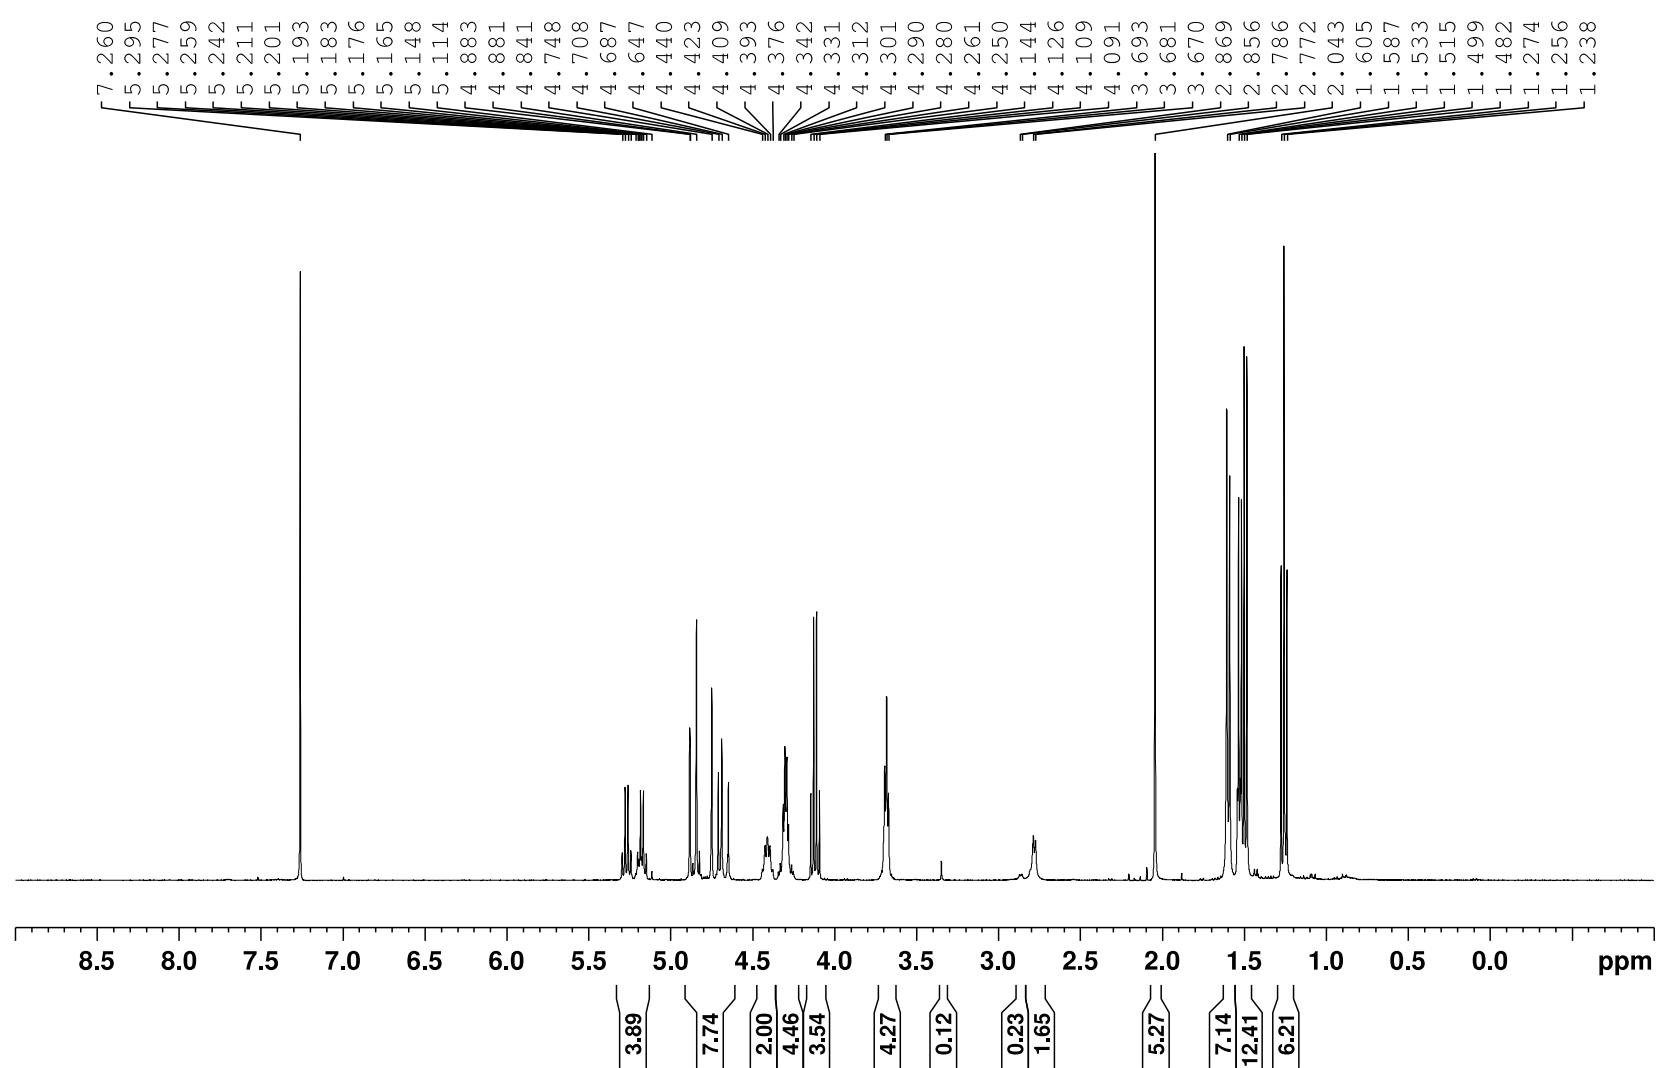

JHS-3010; LGLGL-EG-LGLGL; CDCl<sub>3</sub>; 13C; 400a;  
2048 Scans; 9/16/16

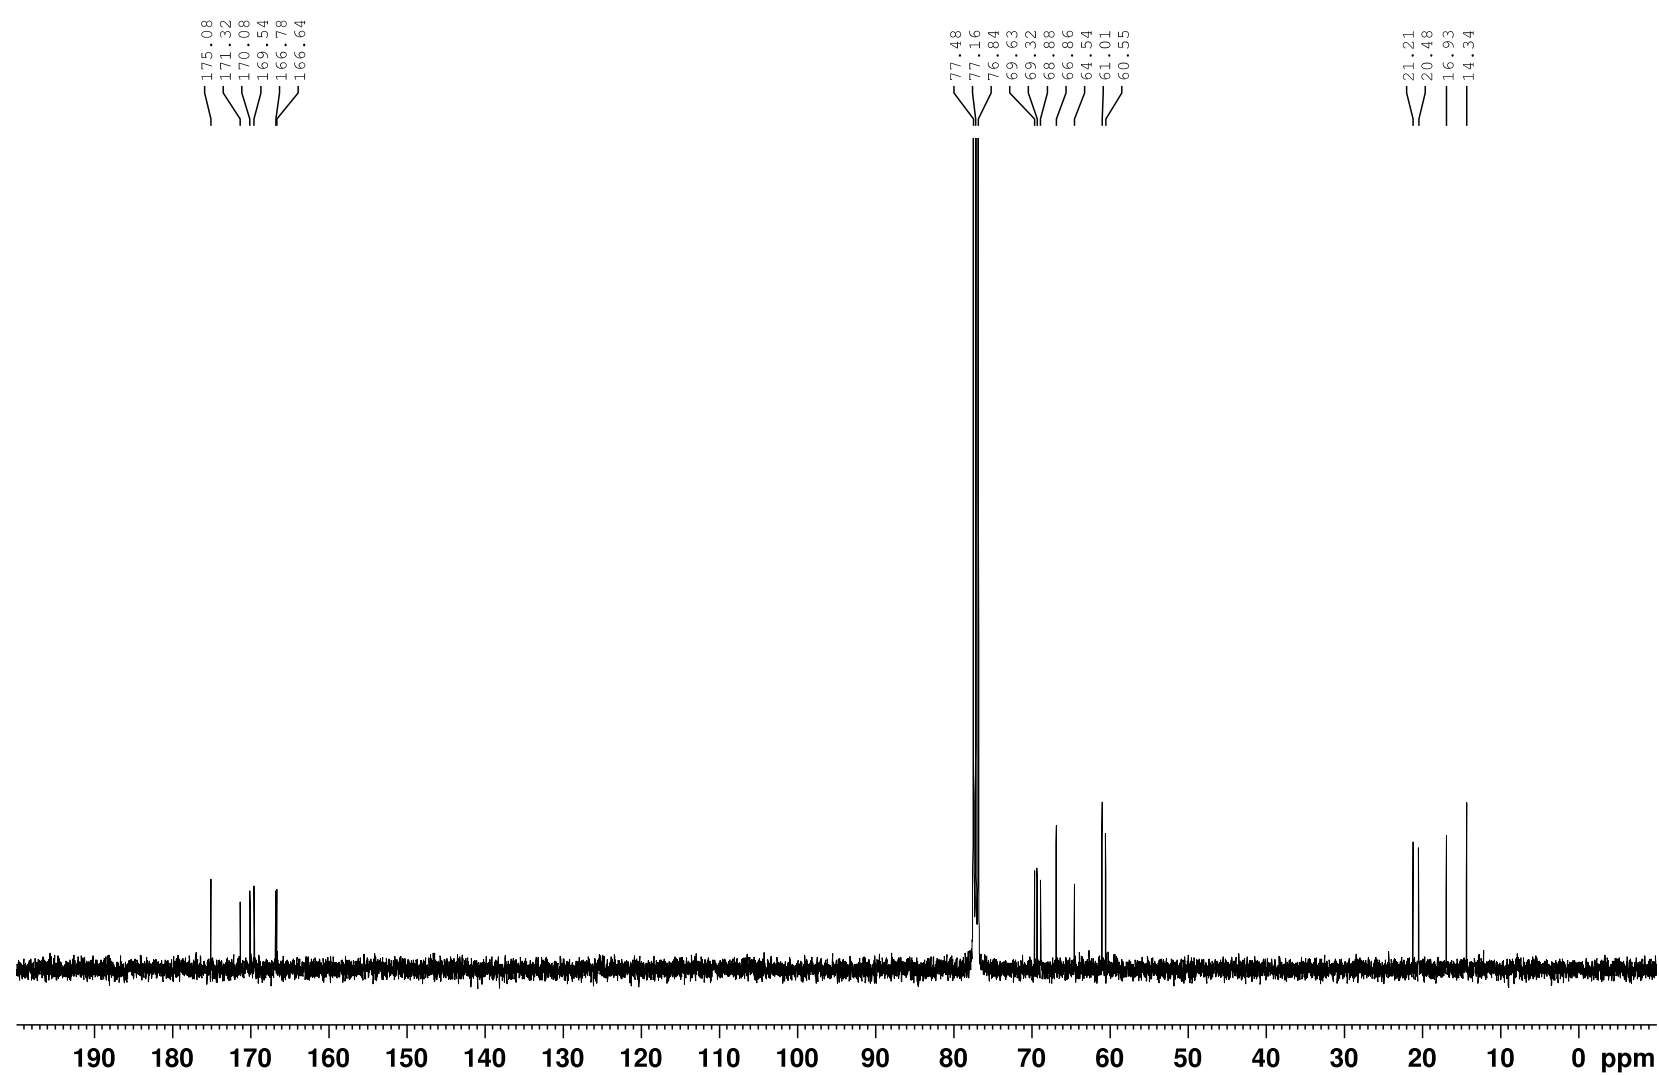

| <b>BLGLGL-EG-LGLGLB</b>                                                            |           |      |                                                                                     | <sup>13</sup> C-NMR (400 MHz, CDCl <sub>3</sub> ) |                           | HRMS (ESI)                                      |
|------------------------------------------------------------------------------------|-----------|------|-------------------------------------------------------------------------------------|---------------------------------------------------|---------------------------|-------------------------------------------------|
| 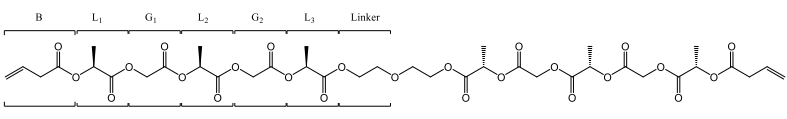 |           |      |                                                                                     | $\delta$ (ppm) + Assignment                       |                           | <u>Calc. Mass</u>                               |
|                                                                                    |           |      |                                                                                     | 16.88                                             | L (CH <sub>3</sub> )      | 906.26 amu                                      |
|                                                                                    |           |      |                                                                                     | 16.92                                             | L (CH <sub>3</sub> )      |                                                 |
|                                                                                    |           |      |                                                                                     | 16.93                                             | L (CH <sub>3</sub> )      | <u>Calc.</u>                                    |
|                                                                                    |           |      |                                                                                     | 60.81                                             | G (CH <sub>2</sub> )      | [M + H] <sup>+</sup>                            |
|                                                                                    |           |      |                                                                                     | 60.97                                             | G (CH <sub>2</sub> )      | 907.27 amu                                      |
|                                                                                    |           |      |                                                                                     | 64.47                                             | Linker (CH <sub>2</sub> ) |                                                 |
|                                                                                    |           |      |                                                                                     | 64.49                                             | Linker (CH <sub>2</sub> ) | <u>Found</u>                                    |
|                                                                                    |           |      |                                                                                     | 68.53                                             | B (CH <sub>2</sub> )      | [M + H] <sup>+</sup>                            |
|                                                                                    |           |      |                                                                                     | 68.84                                             | L (CH)                    | 907.27152                                       |
|                                                                                    |           |      |                                                                                     | 69.22                                             | L (CH)                    | amu                                             |
|                                                                                    |           |      |                                                                                     | 69.56                                             | L (CH)                    |                                                 |
|                                                                                    |           |      |                                                                                     | 119.11                                            | B (CH <sub>2</sub> )      | <u>Composition</u>                              |
|                                                                                    |           |      |                                                                                     | 129.71                                            | B (CH)                    | C <sub>38</sub> H <sub>50</sub> O <sub>25</sub> |
|                                                                                    |           |      |                                                                                     | 166.60                                            | CO                        |                                                 |
|                                                                                    |           |      |                                                                                     | 166.70                                            | CO                        |                                                 |
|                                                                                    |           |      |                                                                                     | 169.55                                            | CO                        |                                                 |
|                                                                                    |           |      |                                                                                     | 170.24                                            | CO                        |                                                 |
|                                                                                    |           |      |                                                                                     | 170.99                                            | CO                        |                                                 |
| <sup>1</sup> H-NMR (400 MHz, CDCl <sub>3</sub> )                                   |           |      |                                                                                     |                                                   |                           |                                                 |
| d $\delta$ (ppm)                                                                   | Mult. (J) | Int. | Assignment                                                                          |                                                   |                           |                                                 |
| 1.52                                                                               | d (6.8)   | 3    | L <sub>1</sub> (CH <sub>3</sub> )                                                   |                                                   |                           |                                                 |
| 1.57                                                                               | d (7.2)   | 3    | L <sub>2</sub> (CH <sub>3</sub> )                                                   |                                                   |                           |                                                 |
| 1.59                                                                               | d (7.2)   | 3    | L <sub>3</sub> (CH <sub>3</sub> )                                                   |                                                   |                           |                                                 |
| 3.18                                                                               | m         | 4    | B (CH <sub>2</sub> )                                                                |                                                   |                           |                                                 |
| 3.68                                                                               | t (4.9)   | 4    | Linker (CH <sub>2</sub> )                                                           |                                                   |                           |                                                 |
| 4.29                                                                               | m         | 4    | Linker (CH <sub>2</sub> )                                                           |                                                   |                           |                                                 |
| 4.63                                                                               | d (16)    | 1    | G <sub>1</sub> (CH <sub>2</sub> )                                                   |                                                   |                           |                                                 |
| 4.64                                                                               | d (16)    | 1    | G <sub>2</sub> (CH <sub>2</sub> )                                                   |                                                   |                           |                                                 |
| 4.86                                                                               | d (16)    | 1    | G <sub>1</sub> (CH <sub>2</sub> )                                                   |                                                   |                           |                                                 |
| 4.88                                                                               | d(16)     | 1    | G <sub>2</sub> (CH <sub>2</sub> )                                                   |                                                   |                           |                                                 |
| 5.21                                                                               | m         | 10   | L <sub>1</sub> (CH), L <sub>2</sub> (CH), L <sub>3</sub> (CH), B (CH <sub>2</sub> ) |                                                   |                           |                                                 |
| 5.92                                                                               | m         | 2    | B (CH)                                                                              |                                                   |                           |                                                 |

**LGLGL-EG-LGLGL** (485 mg, 0.63 mmol, 1 eq) was dissolved in dry DCM (10 mL, 0.05 M) in an oven dried vial under nitrogen. DPTS (84 mg, 0.28 mmol, 0.45 eq) and DCC (0.39 g, 1.89 mmol, 3 eq) were added sequentially. Butenoic acid (0.165 g, 1.89 mmol, 3 eq) was then added dropwise and allowed to stir at RT overnight. Upon consumption of starting material by TLC, the reaction mixture was diluted with hexanes, washed with sodium bicarbonate 3x, dried over MgSO<sub>4</sub> and filtered to remove DCU and drying agent and concentrated. Crude solid was purified via column chromatography (silica, EtOAc/hexanes) to yield a colorless oil (549 mg, 96% yield).

1; BLGLGL-EG-LGLGLB; CDC13; 1H; 400a; 16 Scans;

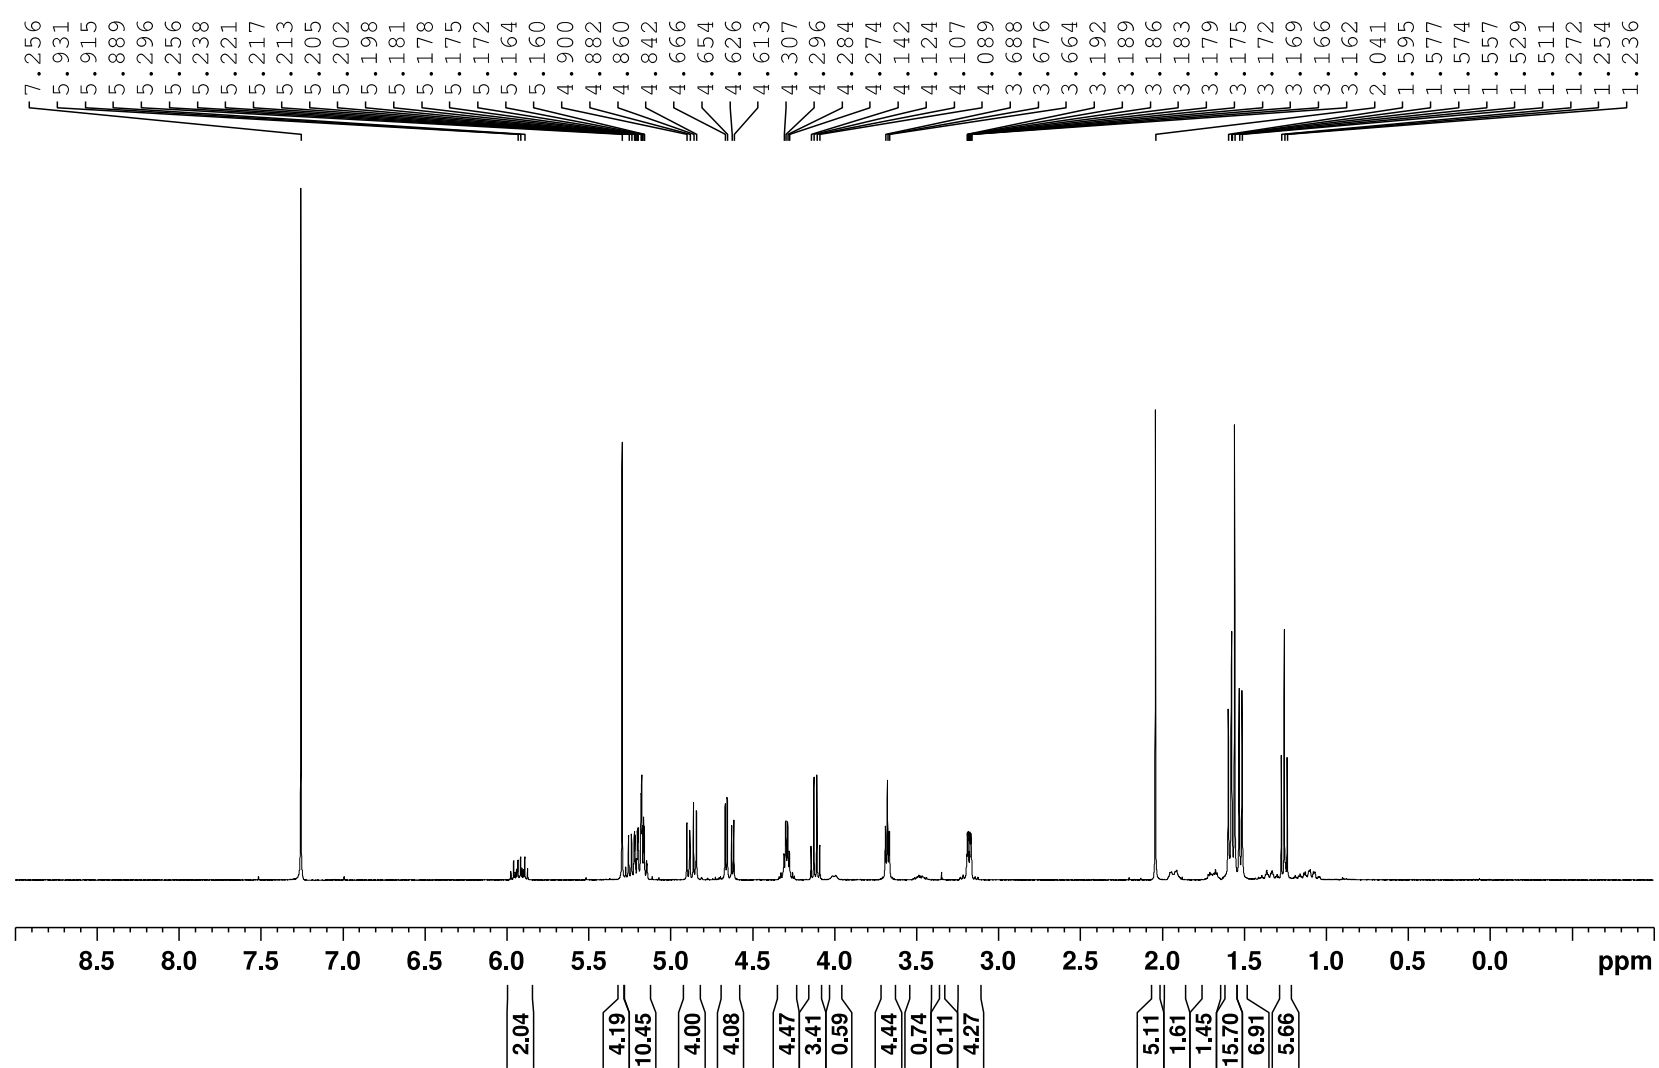

JHS-3011; BLGLGL-EG-LGLGLB; CDC13; 13C; 400 2048 Scans; 9/20/16

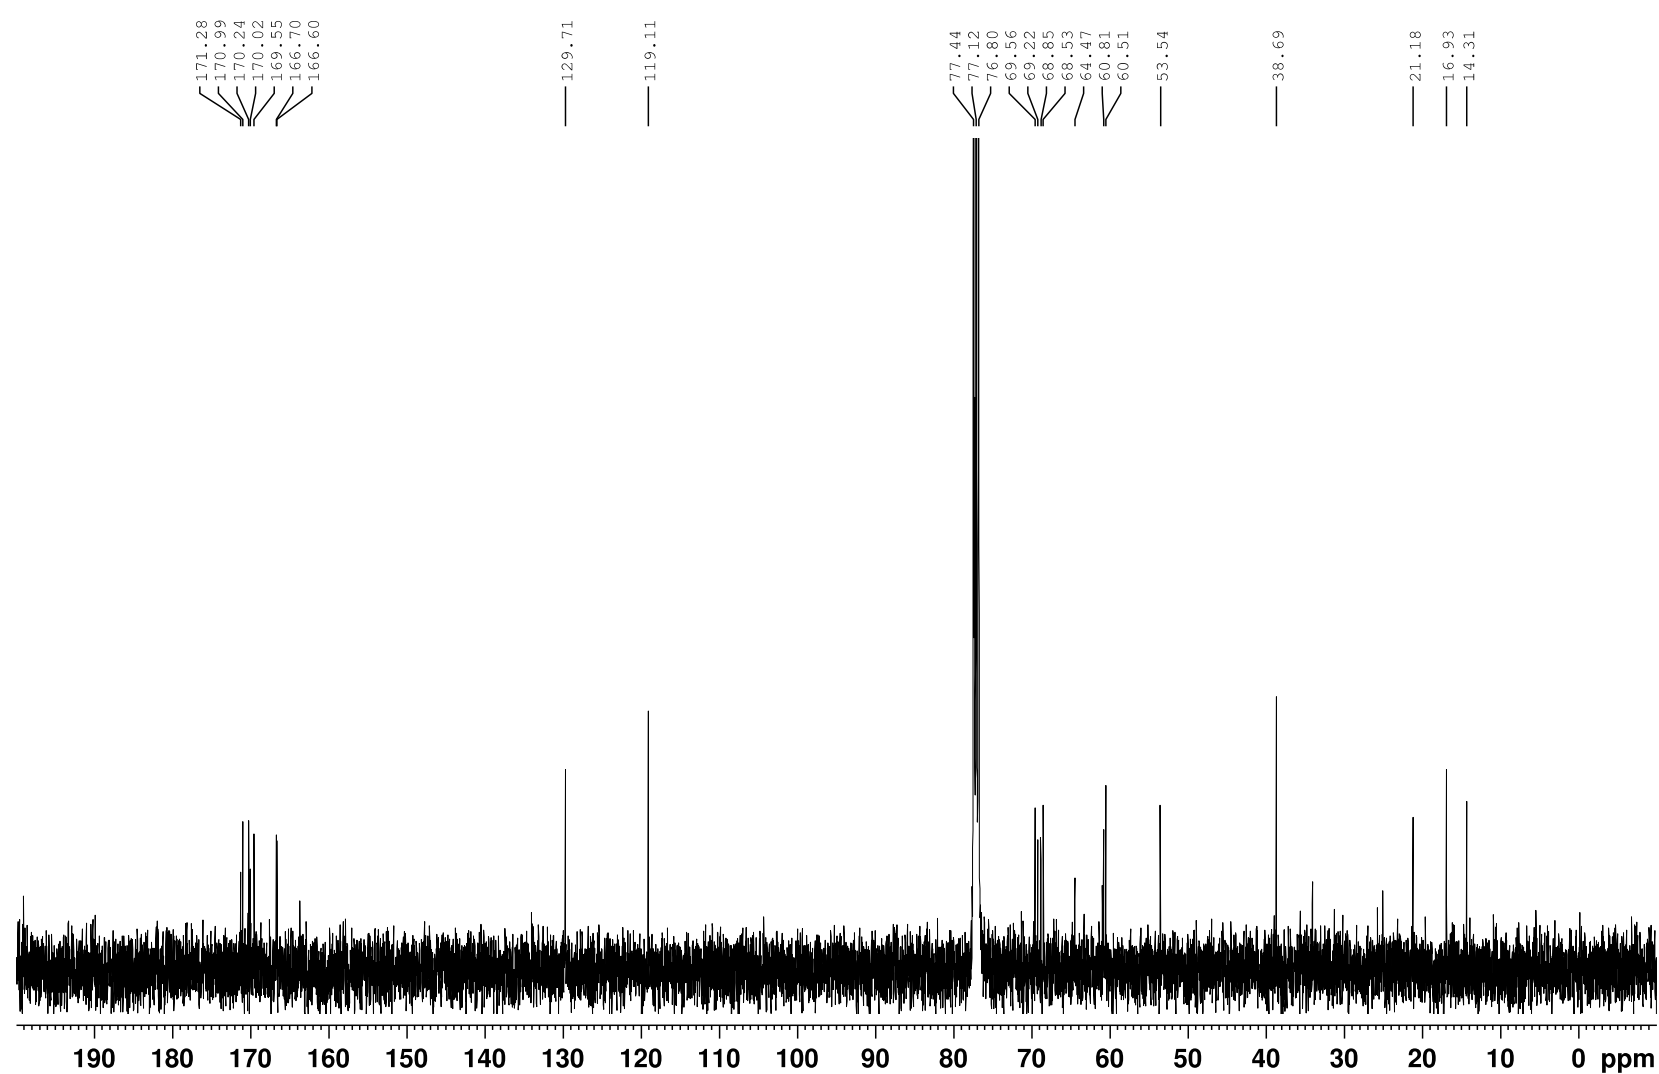

| Cyclic EEG Monomer                                                                 |           |      |                                                                      | <sup>13</sup> C-NMR (400 MHz, CDCl <sub>3</sub> ) | HRMS (ESI)                                      |
|------------------------------------------------------------------------------------|-----------|------|----------------------------------------------------------------------|---------------------------------------------------|-------------------------------------------------|
| 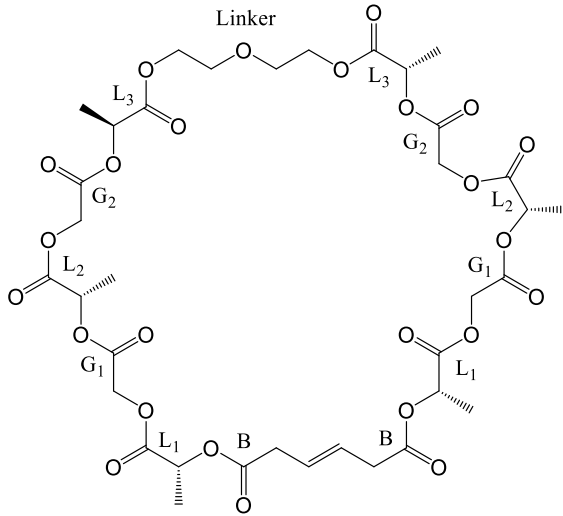 |           |      |                                                                      | δ (ppm) + Assignment                              | <u>Calc. Mass</u>                               |
|                                                                                    |           |      |                                                                      | 16.70 L (CH <sub>3</sub> )                        | 878.23 amu                                      |
|                                                                                    |           |      |                                                                      | 16.73 L (CH <sub>3</sub> ), L (CH <sub>3</sub> )  |                                                 |
|                                                                                    |           |      |                                                                      | 37.35 B (CH <sub>2</sub> )                        | <u>Calc.</u>                                    |
|                                                                                    |           |      |                                                                      | 60.79 G (CH <sub>2</sub> )                        | [M + H] <sup>+</sup>                            |
|                                                                                    |           |      |                                                                      | 60.86 G (CH <sub>2</sub> )                        | 879.23 amu                                      |
|                                                                                    |           |      |                                                                      | 64.39 Linker (CH <sub>2</sub> )                   |                                                 |
|                                                                                    |           |      |                                                                      | 68.44 Linker (CH <sub>2</sub> )                   | <u>Found</u>                                    |
|                                                                                    |           |      |                                                                      | 68.70 L (CH)                                      | [M + H] <sup>+</sup>                            |
|                                                                                    |           |      |                                                                      | 69.09 L (CH)                                      | 879.23971                                       |
|                                                                                    |           |      |                                                                      | 69.50 L (CH)                                      | amu                                             |
|                                                                                    |           |      |                                                                      | 125.67 B (CH)                                     |                                                 |
|                                                                                    |           |      |                                                                      | 166.50 CO                                         | <u>Composition</u>                              |
|                                                                                    |           |      |                                                                      | 166.51 CO                                         | C <sub>36</sub> H <sub>46</sub> O <sub>25</sub> |
|                                                                                    |           |      |                                                                      | 169.36 CO                                         |                                                 |
|                                                                                    |           |      |                                                                      | 169.89 CO                                         |                                                 |
|                                                                                    |           |      |                                                                      | 169.92 CO                                         |                                                 |
|                                                                                    |           |      |                                                                      | 170.61 CO                                         |                                                 |
| <sup>1</sup> H-NMR (400 MHz, CDCl <sub>3</sub> )                                   |           |      |                                                                      |                                                   |                                                 |
| dδ (ppm)                                                                           | Mult. (J) | Int. | Assignment                                                           |                                                   |                                                 |
| 1.52                                                                               | d (6.8)   | 3    | L <sub>1</sub> (CH <sub>3</sub> )                                    |                                                   |                                                 |
| 1.54                                                                               | d (7.2)   | 3    | L <sub>2</sub> (CH <sub>3</sub> )                                    |                                                   |                                                 |
| 1.57                                                                               | d (7.2)   | 3    | L <sub>3</sub> (CH <sub>3</sub> )                                    |                                                   |                                                 |
| 3.16                                                                               | m         | 4    | B (CH <sub>2</sub> )                                                 |                                                   |                                                 |
| 3.68                                                                               | m         | 4    | Linker (CH <sub>2</sub> )                                            |                                                   |                                                 |
| 4.30                                                                               | m         | 4    | Linker (CH <sub>2</sub> )                                            |                                                   |                                                 |
| 4.70                                                                               | m         | 4    | G <sub>1</sub> (CH <sub>2</sub> ), G <sub>1</sub> (CH <sub>2</sub> ) |                                                   |                                                 |
| 4.81                                                                               | d (16)    | 2    | G <sub>1</sub> (CH <sub>2</sub> )                                    |                                                   |                                                 |
| 4.83                                                                               | d(16)     | 2    | G <sub>2</sub> (CH <sub>2</sub> )                                    |                                                   |                                                 |
| 5.21                                                                               | m         | 6    | L <sub>1</sub> (CH), L <sub>2</sub> (CH), L <sub>3</sub> (CH)        |                                                   |                                                 |
| 5.78                                                                               | m         | 2    | B (CH)                                                               |                                                   |                                                 |

**BLGLGL-EG-LGLGLB** (500 mg, 0.55 mmol, 1 eq) was dissolved in dry DCM (550 mL, 0.001M) in a flame-dried Schlenk flask under nitrogen. A stock solution of Grubbs 2 (51 mg, 0.055 mmol, 10 mol%) in dry DCM was added and allowed to stir at RT overnight. Upon consumption of starting material by TLC, reaction mixture was quenched by addition of excess ethyl vinyl ether and stirring for 10 additional min. The reaction mixture was then concentrated and the crude solid was purified via column chromatography (silica, EtOAc/hexanes) to yield a thick brown oil (400 mg, 83% yield).

JHS-3012; Ext. EG Monomer; CDCl<sub>3</sub>; 1H; 400a;  
16 Scans; 9/21/16

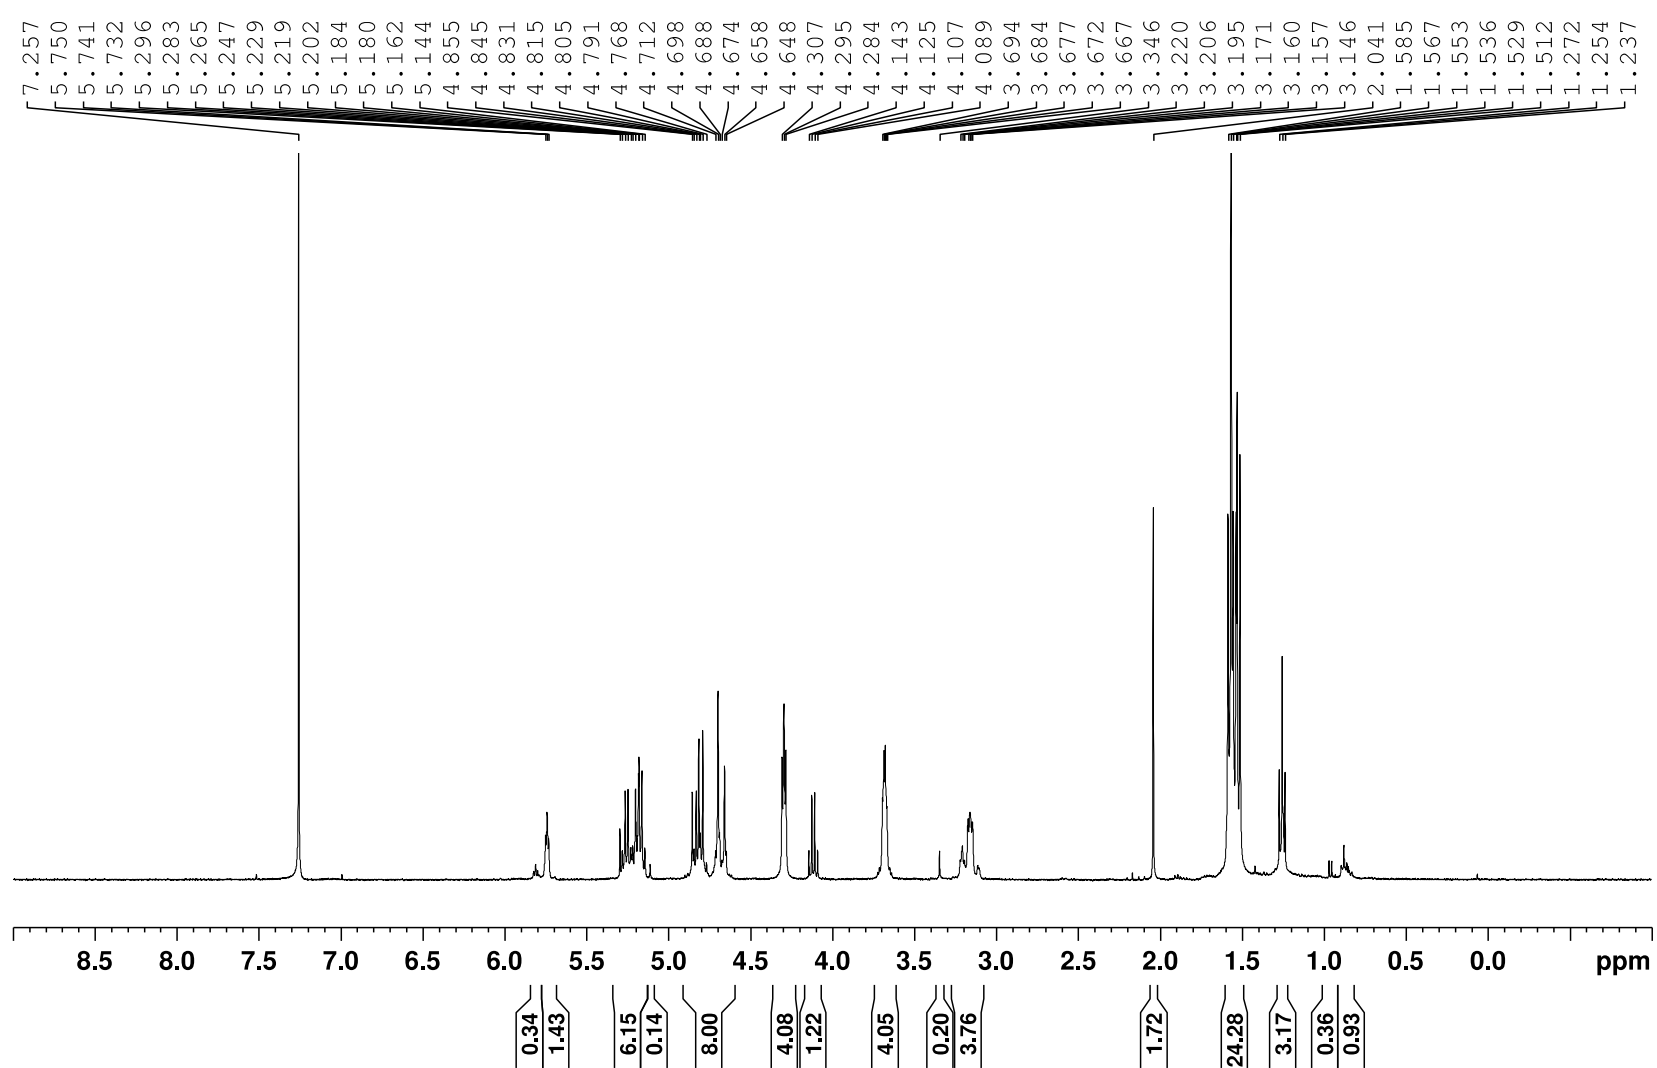

JHS-3012; EEG Monomer; CDCl<sub>3</sub>; 13C; 500;  
128 Scans; 10/12/17

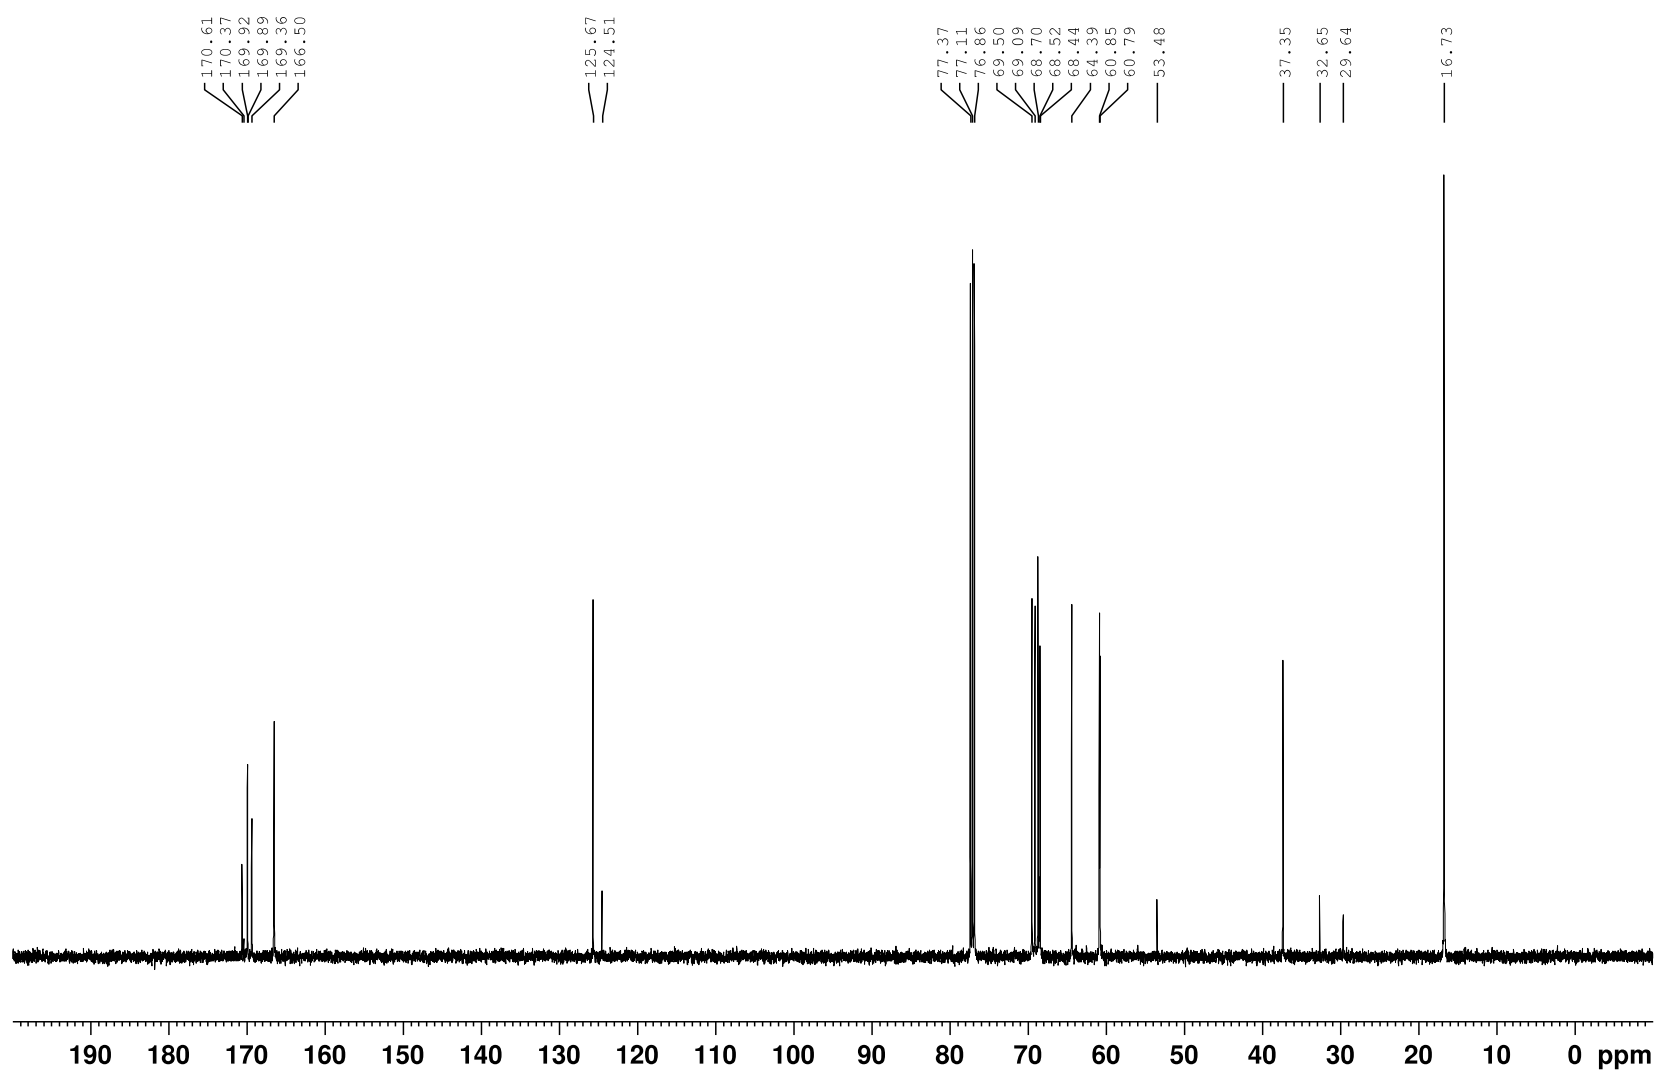

| <b>Poly(EEG)</b>                                                                   |           |      |                                       | <sup>13</sup> C-NMR (400 MHz, CDCl <sub>3</sub> ) | HRMS (ESI)              |
|------------------------------------------------------------------------------------|-----------|------|---------------------------------------|---------------------------------------------------|-------------------------|
| 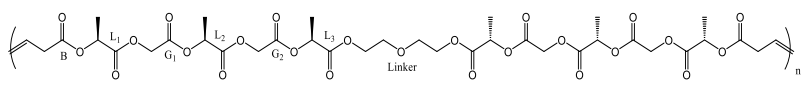 |           |      |                                       | $\delta$ (ppm) + Assignment                       | $M_n$                   |
|                                                                                    |           |      |                                       | 16.80 L (CH <sub>3</sub> )                        | 27,178 Da               |
|                                                                                    |           |      |                                       | 37.33 B (CH <sub>2</sub> )                        | $\underline{D}$<br>1.25 |
|                                                                                    |           |      |                                       | 60.74 G (CH <sub>2</sub> )                        |                         |
|                                                                                    |           |      |                                       | 60.89 G (CH <sub>2</sub> )                        |                         |
|                                                                                    |           |      |                                       | 64.39 Linker (CH <sub>2</sub> )                   |                         |
|                                                                                    |           |      |                                       | 68.51 L (CH)                                      |                         |
|                                                                                    |           |      |                                       | 68.77 L (CH)                                      |                         |
|                                                                                    |           |      |                                       | 69.14 L (CH)                                      |                         |
|                                                                                    |           |      |                                       | 69.50 Linker (CH <sub>2</sub> )                   |                         |
|                                                                                    |           |      |                                       | 124.34 B (CH Cis)                                 |                         |
|                                                                                    |           |      |                                       | 125.76 B (CH Trans)                               |                         |
|                                                                                    |           |      |                                       | 166.53 CO                                         |                         |
|                                                                                    |           |      |                                       | 166.62 CO                                         |                         |
|                                                                                    |           |      |                                       | 169.45 CO                                         |                         |
|                                                                                    |           |      |                                       | 169.92 CO                                         |                         |
|                                                                                    |           |      |                                       | 170.10 CO                                         |                         |
|                                                                                    |           |      |                                       | 170.81 CO                                         |                         |
| <sup>1</sup> H-NMR (500 MHz, CDCl <sub>3</sub> )                                   |           |      |                                       |                                                   |                         |
| d $\delta$ (ppm)                                                                   | Mult. (J) | Int. | Assignment                            |                                                   |                         |
| 1.53                                                                               | m         | 12   | CH <sub>3</sub> (L <sub>1/2/3</sub> ) |                                                   |                         |
| 3.15                                                                               | m         | 4    | CH <sub>2</sub> (B)                   |                                                   |                         |
| 3.65                                                                               | m         | 4    | CH <sub>2</sub> (Linker)              |                                                   |                         |
| 4.26                                                                               | m         | 4    | CH <sub>2</sub> (Linker)              |                                                   |                         |
| 4.61                                                                               | d (16)    | 2    | CH <sub>2</sub> (G)                   |                                                   |                         |
| 4.62                                                                               | d (16)    | 2    | CH <sub>2</sub> (G)                   |                                                   |                         |
| 4.84                                                                               | d (16)    | 2    | CH <sub>2</sub> (G)                   |                                                   |                         |
| 4.86                                                                               | d(16)     | 2    | CH <sub>2</sub> (G)                   |                                                   |                         |
| 5.17                                                                               | m         | 10   | CH (L <sub>1/2/3</sub> )              |                                                   |                         |
| 5.69                                                                               | m         | 1.5  | CH (B Trans)                          |                                                   |                         |
| 5.78                                                                               | m         | 0.5  | CH (B Cis)                            |                                                   |                         |

**Cyclic EEG Monomer** (104 mg, 0.118 mmol, 1 eq.) was weighed in a flame dried 1 mL vial under nitrogen. A stock solution of Grubbs II (1 mg, 0.0012 mmol, 3 mol%) in dry DCM (5.8 mg/mL, 0.17 mL, 0.7M) was added and the vial was shaken for 4 h. The reaction mixture was quenched by the addition of excess ethyl vinyl ether and vortexing. Solution was concentrated to yield a crude solid polymer, which was reprecipitated into a stirring solution of MeOH and filtered to collect pure polymer as a brown solid (84 mg, 81% yield).

JHS-3044-Pure; Poly(EEG); CDCl<sub>3</sub>; 1H; 400a;  
16 Scans; 2/28/17

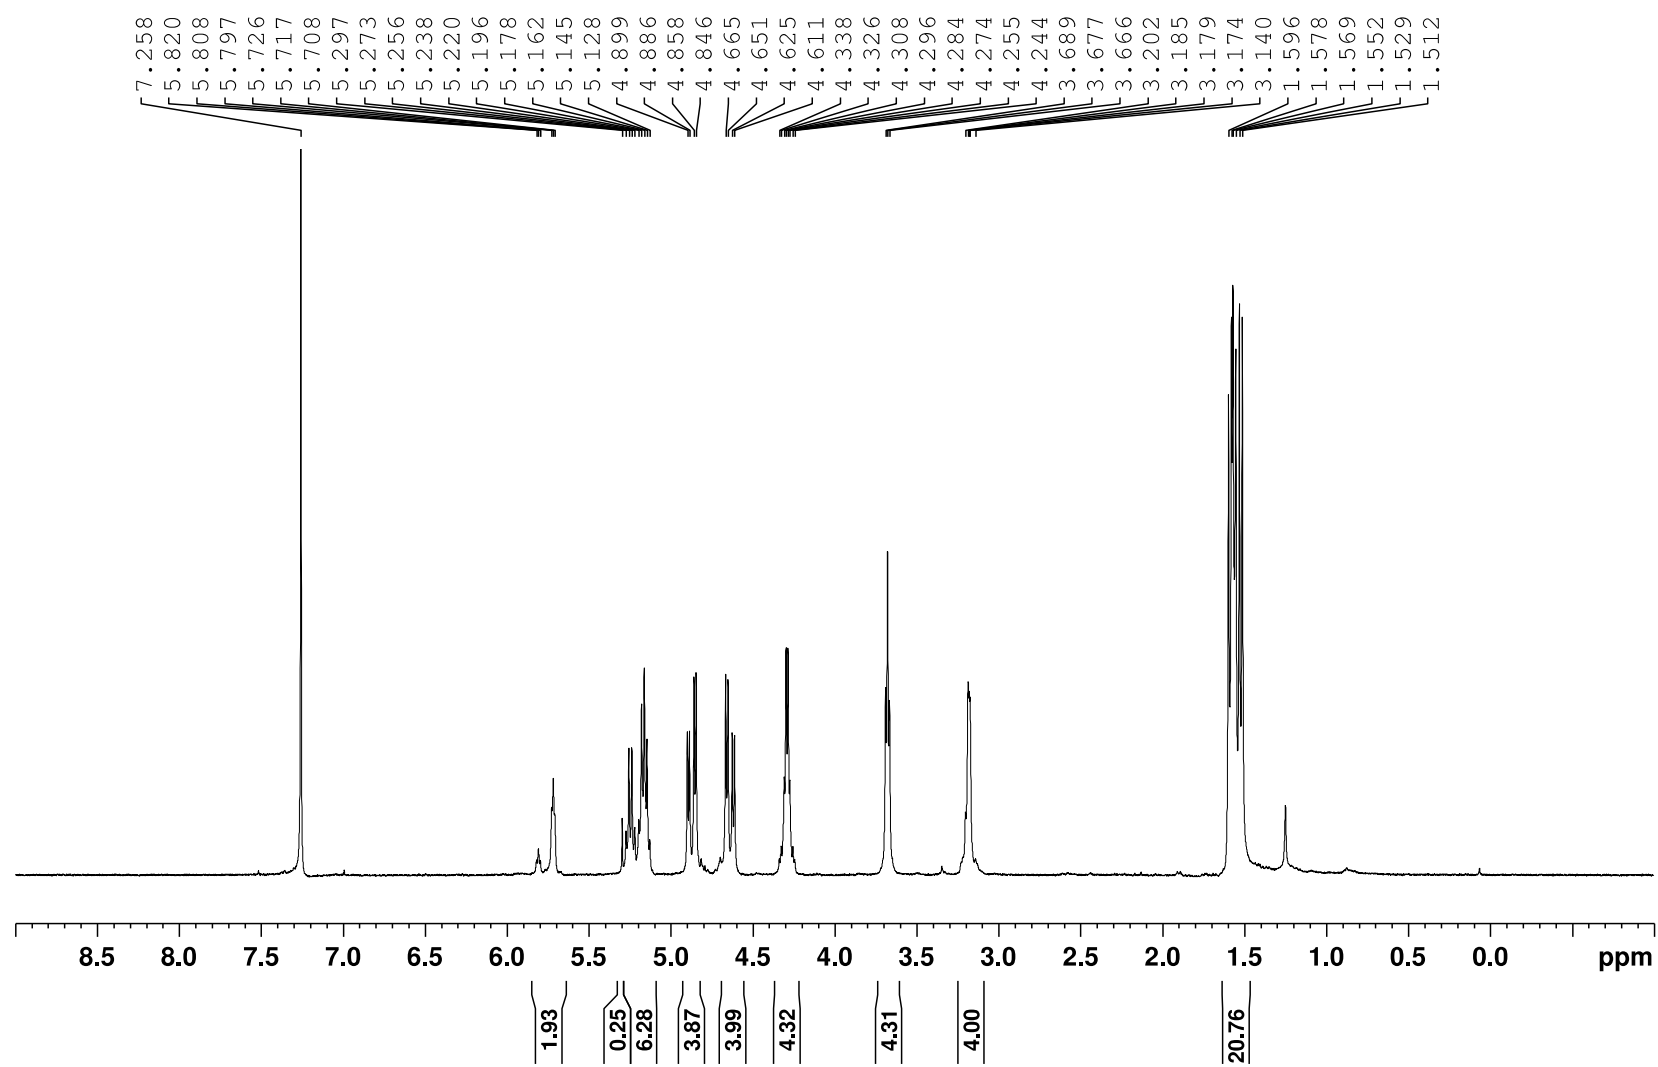

JHS-3044; Poly(EEG); CDCl<sub>3</sub>; 13C; 500; 64 Scans;  
10/27/17

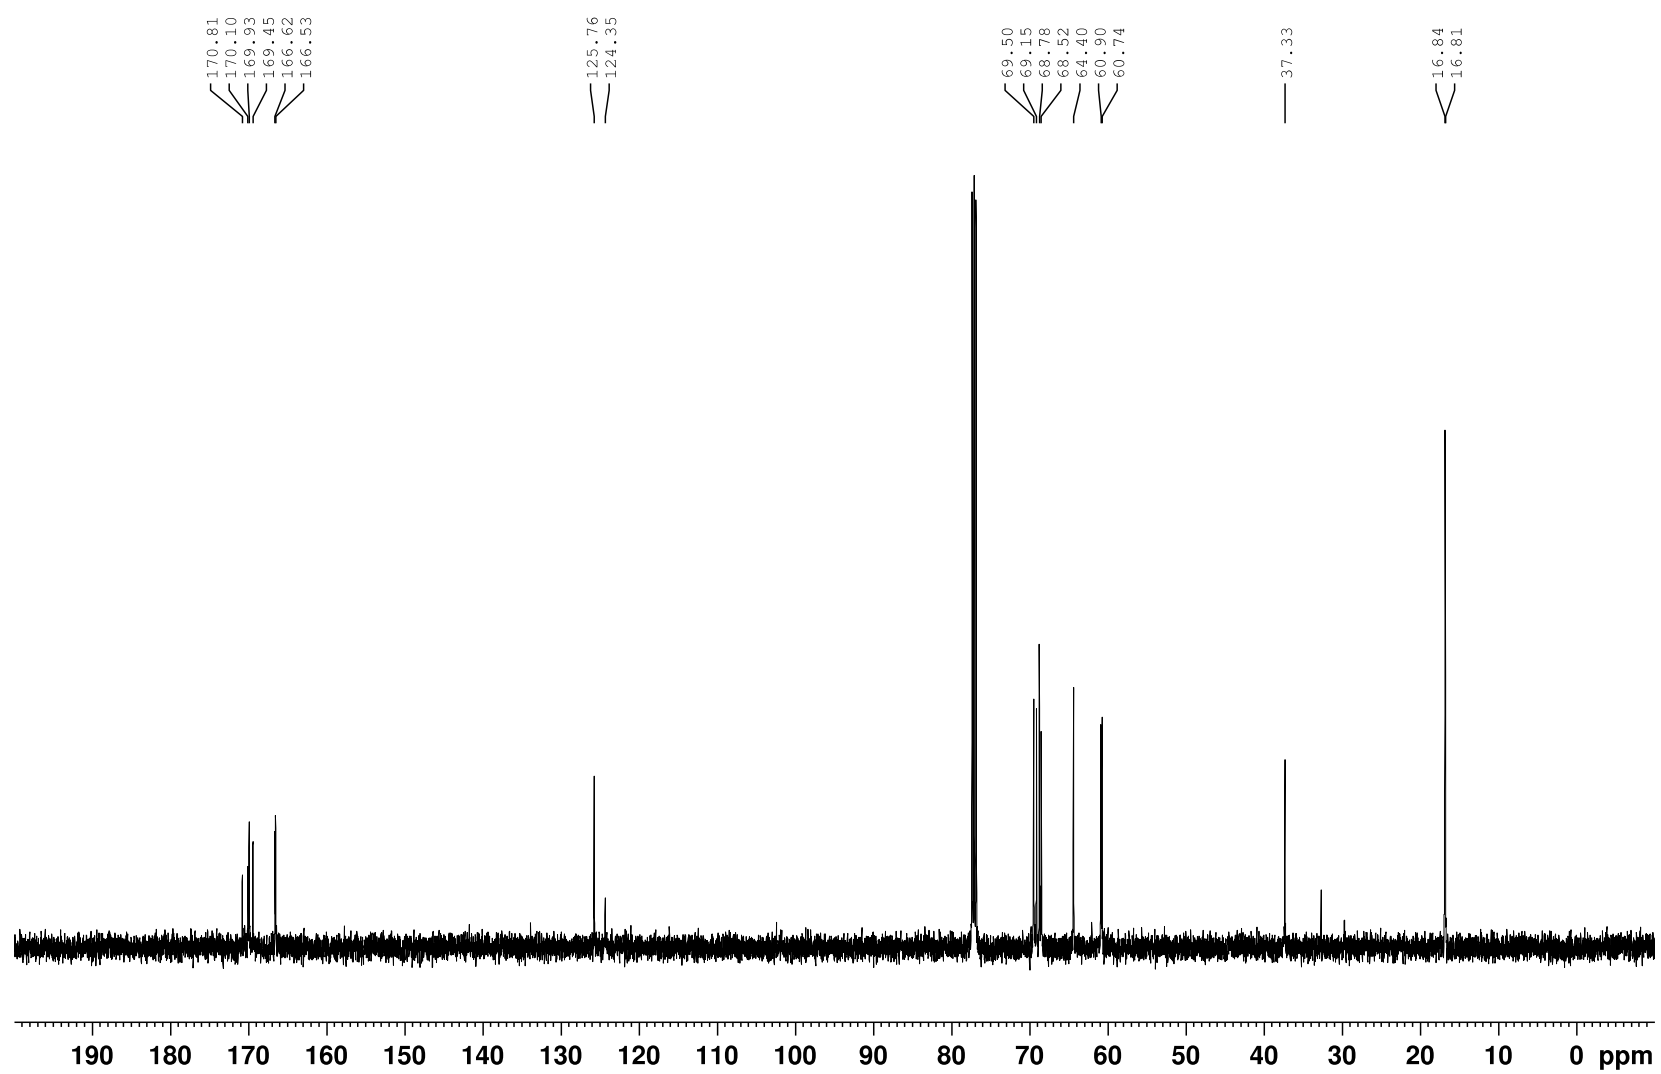

### 3.0 REFERENCES

1. Fischer-Cripps, A. C., Nanoindentation Testing. **2011**, 21-37.
2. Jha, K. K.; Suksawang, N.; Lahiri, D.; Agarwal, A., Evaluating initial unloading stiffness from elastic work-of-indentation measured in a nanoindentation experiment. *Journal of Materials Research* **2013**, *28* (6), 789-797.
3. Oyen, M. L.; Cook, R. F., A practical guide for analysis of nanoindentation data. *Journal of the Mechanical Behavior of Biomedical Materials* **2009**, *2* (4), 396-407.
4. Dokukin, M. E.; Sokolov, I., On the Measurements of Rigidity Modulus of Soft Materials in Nanoindentation Experiments at Small Depth. *Macromolecules* **2012**, *45* (10), 4277-4288.
5. Oliver, W. C.; Pharr, G. M., Measurement of hardness and elastic modulus by instrumented indentation: Advances in understanding and refinements to methodology. *Journal of Materials Research* **2011**, *19* (1), 3-20.
6. Shirazi, R. N.; Aldabbagh, F.; Erxleben, A.; Rochev, Y.; McHugh, P., Nanomechanical properties of poly(lactic-co-glycolic) acid film during degradation. *Acta Biomaterialia* **2014**, *10* (11), 4695-4703.
7. Moore, J. S.; Stupp, S. I., Room temperature polyesterification. *Macromolecules* **1990**, *23* (1), 65-70.
8. Li, J.; Rothstein, S. N.; Little, S. R.; Edenborn, H. M.; Meyer, T. Y., The Effect of Monomer Order on the Hydrolysis of Biodegradable Poly(lactic-co-glycolic acid) Repeating Sequence Copolymers. *Journal of the American Chemical Society* **2012**, *134* (39), 16352-16359.
9. Weiss, R. M.; Short, A. L.; Meyer, T. Y., Sequence-Controlled Copolymers Prepared via Entropy-Driven Ring-Opening Metathesis Polymerization. *Acs Macro Letters* **2015**, *4* (9), 1039-1043.
10. Stayshich, R. M.; Meyer, T. Y., Preparation and microstructural analysis of poly(lactic-alt-glycolic acid). *Journal of Polymer Science Part A: Polymer Chemistry* **2008**, *46* (14), 4704-4711.
